# Supplementary material
Source: publisher site journal article supplement (https://www.degruyterbrill.com/publication/isbn/9783110413779/downloadAsset/9783110413779_avlog_MacOSX.zip)
Supplement: Supplementary file 75 [file pdf_use14corefonts.pdf › Mac OS X/dist/avlog.app/Contents/Resources/lib/python2.7/matplotlib/tests/baseline_images/test_backend_pdf/pdf_use14corefonts.pdf]

Test PDF backend with option use14corefonts=True

A three-line text positioned just above a blue line  
and containing some French characters and the euro s

"Merci p  p   pour les 10   "
