# Supplementary material
Source: publisher site journal article supplement (https://www.degruyterbrill.com/publication/isbn/9783110413779/downloadAsset/9783110413779_avlog_MacOSX.zip)
Supplement: Supplementary file 124 [file mathtext_cm_00.pdf › Mac OS X/dist/avlog.app/Contents/Resources/lib/python2.7/matplotlib/tests/baseline_images/test_mathtext/mathtext_cm_00.pdf]

$$a + b + \dot{s} + \dot{s} + \dots$$
