# Supplementary material
Source: publisher site journal article supplement (https://www.degruyterbrill.com/publication/isbn/9783110413779/downloadAsset/9783110413779_avlog_MacOSX.zip)
Supplement: Supplementary file 146 [file mathtext_cm_22.pdf › Mac OS X/dist/avlog.app/Contents/Resources/lib/python2.7/matplotlib/tests/baseline_images/test_mathtext/mathtext_cm_22.pdf]

$$\mathcal{R} \prod_{i=\alpha_i+1}^{\infty} a_i \sin(2\pi f x_i)$$
