# Supplementary material
Source: publisher site journal article supplement (https://www.degruyterbrill.com/publication/isbn/9783110413779/downloadAsset/9783110413779_avlog_MacOSX.zip)
Supplement: Supplementary file 212 [file mathtext_stix_21.pdf › Mac OS X/dist/avlog.app/Contents/Resources/lib/python2.7/matplotlib/tests/baseline_images/test_mathtext/mathtext_stix_21.pdf]

$$\text{Foo: } a_{i+1}^j = \sin(2\pi f_j t_i) e^{-5t_i/\tau}$$
