# Supplementary material
Source: publisher site journal article supplement (https://www.degruyterbrill.com/publication/isbn/9783110413779/downloadAsset/9783110413779_avlog_MacOSX.zip)
Supplement: Supplementary file 228 [file mathtext_stix_37.pdf › Mac OS X/dist/avlog.app/Contents/Resources/lib/python2.7/matplotlib/tests/baseline_images/test_mathtext/mathtext_stix_37.pdf]

$$W_{\delta_1 \rho_1 \sigma_2}^{3\beta} = U_{\delta_1 \rho_1}^{3\beta} + \frac{1}{8\pi^2} \int_{\alpha_2}^{\alpha_2'} d\alpha_2' \left[ \frac{U_{\delta_1 \rho_1}^{2\beta} - \alpha_2' U_{\rho_1 \sigma_2}^{1\beta}}{U_{\rho_1 \sigma_2}^{0\beta}} \right]$$
