# Supplementary material
Source: publisher site journal article supplement (https://www.degruyterbrill.com/publication/isbn/9783110413779/downloadAsset/9783110413779_avlog_MacOSX.zip)
Supplement: Supplementary file 308 [file mathtext_stixsans_50.pdf › Mac OS X/dist/avlog.app/Contents/Resources/lib/python2.7/matplotlib/tests/baseline_images/test_mathtext/mathtext_stixsans_50.pdf]

$$\binom{p}{2} x^2 y^{p-2} = \frac{1}{1-x} \frac{1}{1-x^2}$$
