# Supplementary material
Source: publisher site journal article supplement (https://www.degruyterbrill.com/publication/isbn/9783110413779/downloadAsset/9783110413779_avlog_MacOSX.zip)
Supplement: Supplementary file 355 [file multiline.pdf › Mac OS X/dist/avlog.app/Contents/Resources/lib/python2.7/matplotlib/tests/baseline_images/test_text/multiline.pdf]

multiline  
text alignment

TpTpTp  
*M*  
TpTpTp

TpTpTp  
*M*<sup>*M*<sup>*M*</sup></sup>  
TpTpTp

TpTpTp  
*M*<sub>*q*<sub>*q*</sub></sub>  
TpTpTp
