# Supplementary material (part 1 of 2)
Source: publisher site journal article supplement (https://www.degruyterbrill.com/publication/isbn/9783110413779/downloadAsset/9783110413779_avlog_MacOSX.zip)

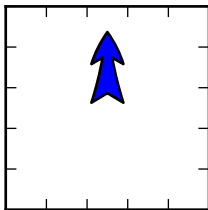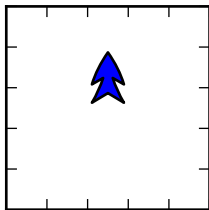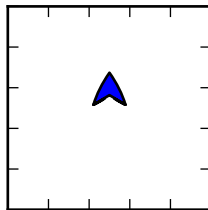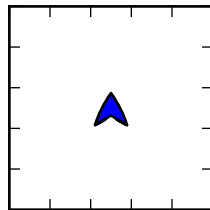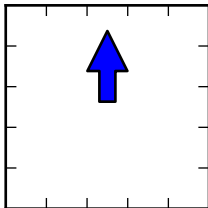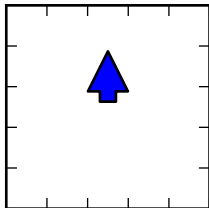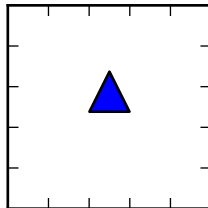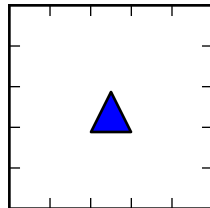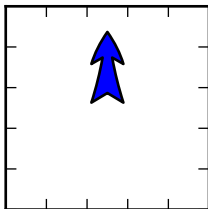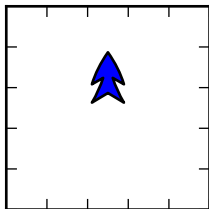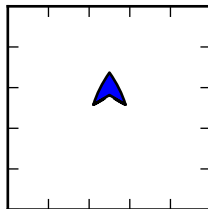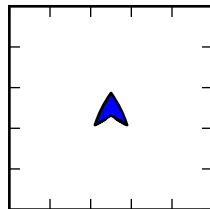

Supplement: Supplementary file 1 [file fancyarrow_test_image.pdf › Mac OS X/dist/avlog.app/Contents/Resources/lib/python2.7/matplotlib/tests/baseline_images/test_arrow_patches/fancyarrow_test_image.pdf]

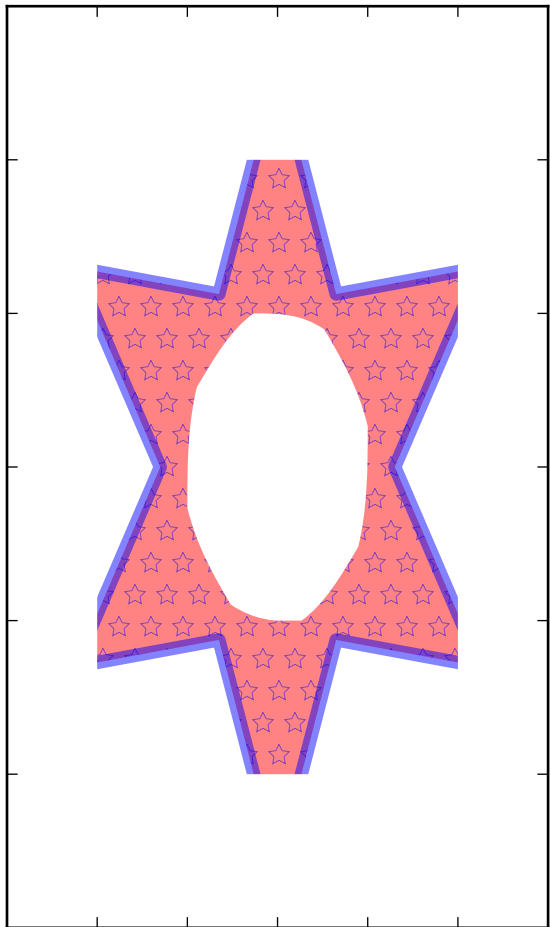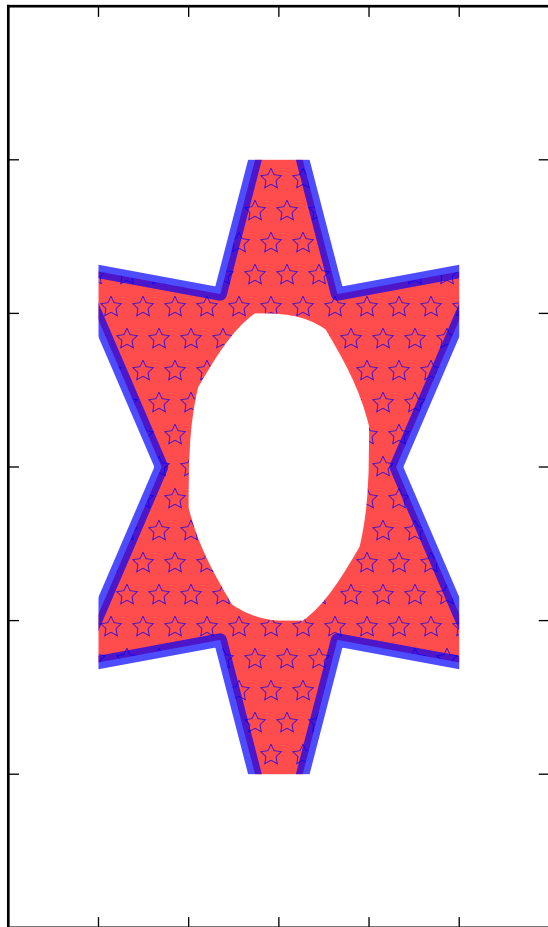

Supplement: Supplementary file 2 [file clip_path_clipping.pdf › Mac OS X/dist/avlog.app/Contents/Resources/lib/python2.7/matplotlib/tests/baseline_images/test_artist/clip_path_clipping.pdf]

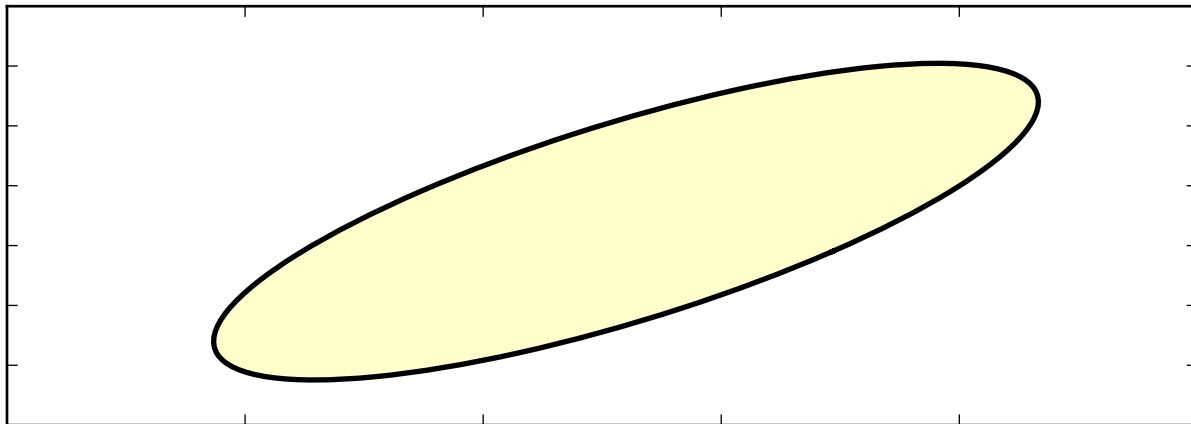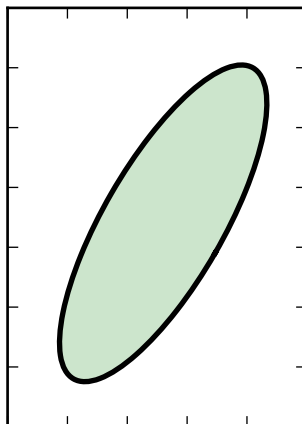

Supplement: Supplementary file 3 [file arc_ellipse.pdf › Mac OS X/dist/avlog.app/Contents/Resources/lib/python2.7/matplotlib/tests/baseline_images/test_axes/arc_ellipse.pdf]

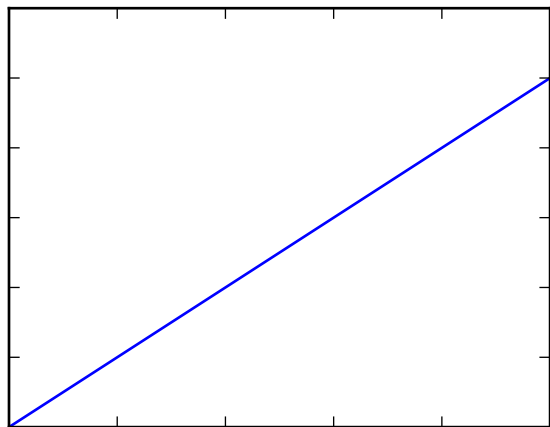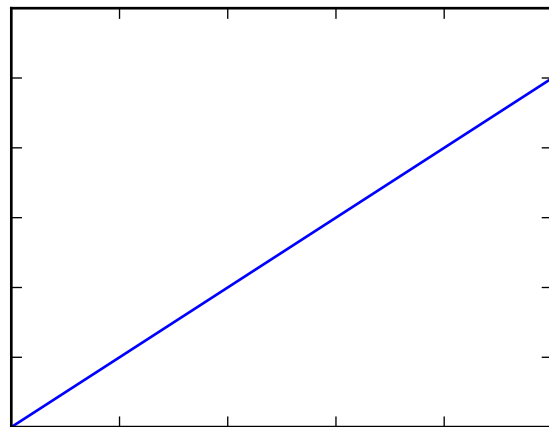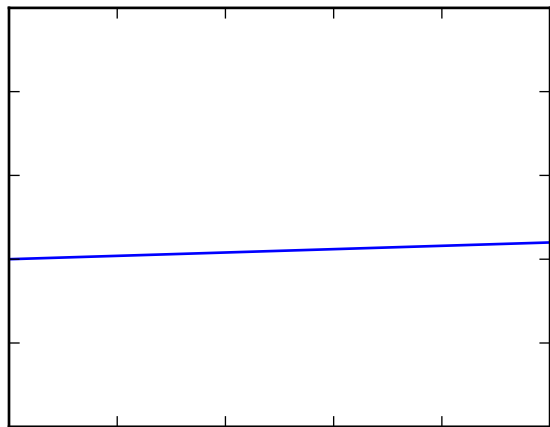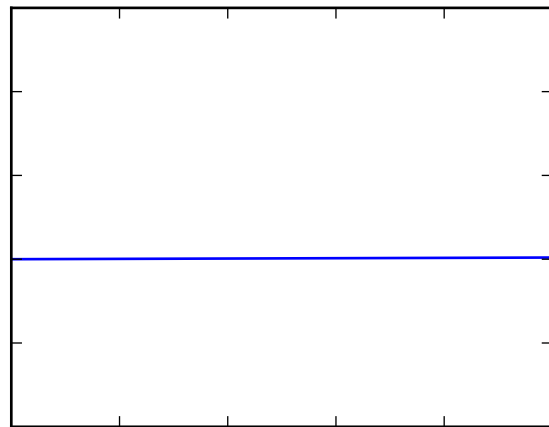

Supplement: Supplementary file 4 [file autoscale_tiny_range.pdf › Mac OS X/dist/avlog.app/Contents/Resources/lib/python2.7/matplotlib/tests/baseline_images/test_axes/autoscale_tiny_range.pdf]

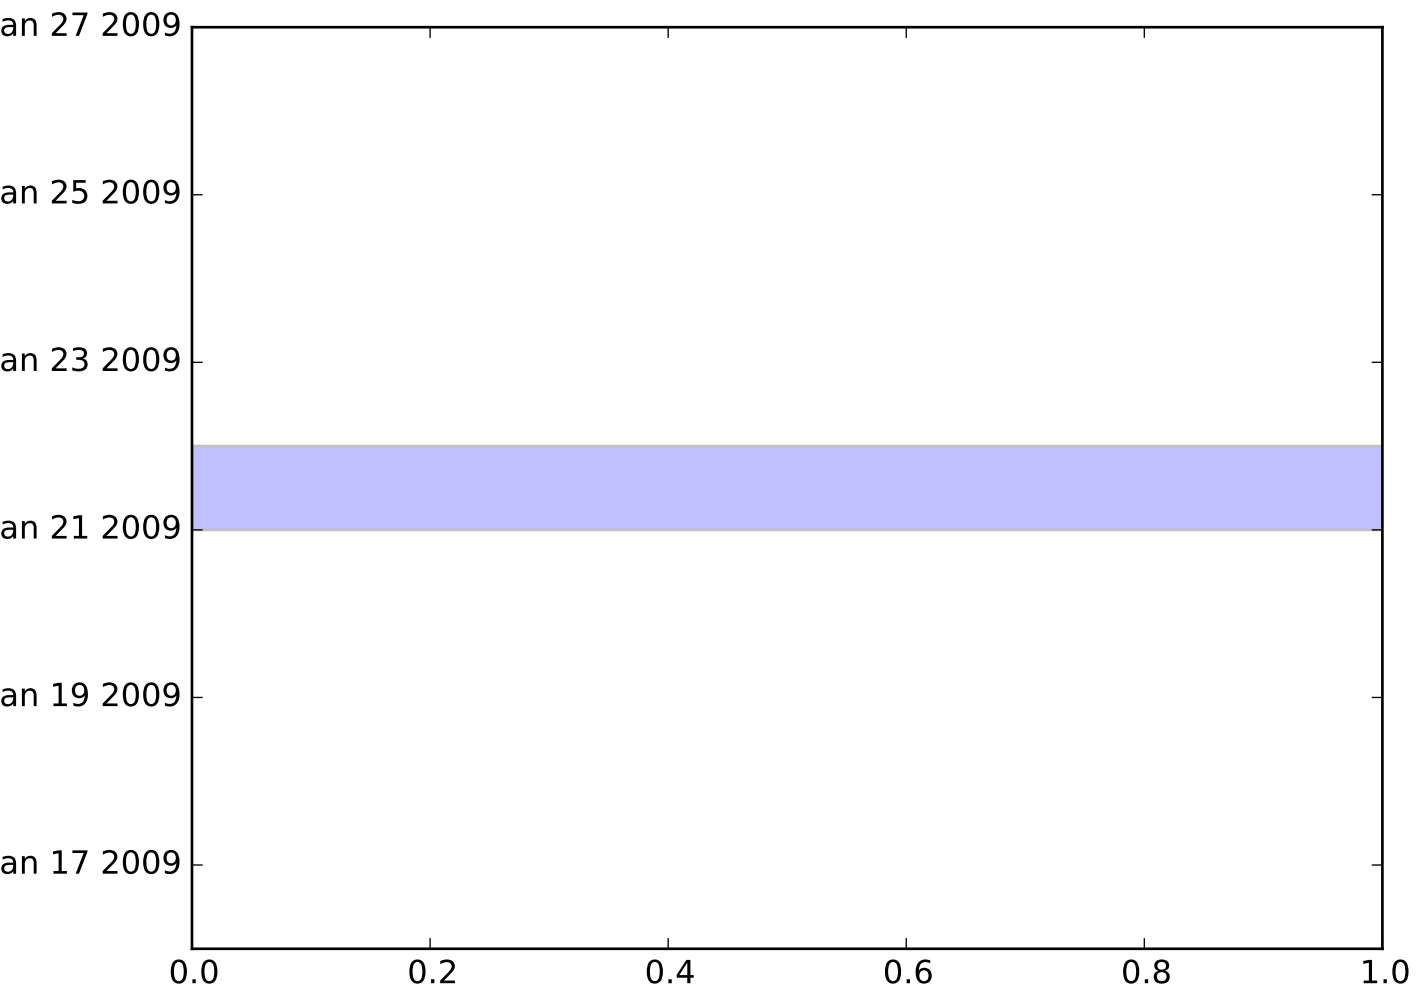

Supplement: Supplementary file 5 [file axhspan_epoch.pdf › Mac OS X/dist/avlog.app/Contents/Resources/lib/python2.7/matplotlib/tests/baseline_images/test_axes/axhspan_epoch.pdf]

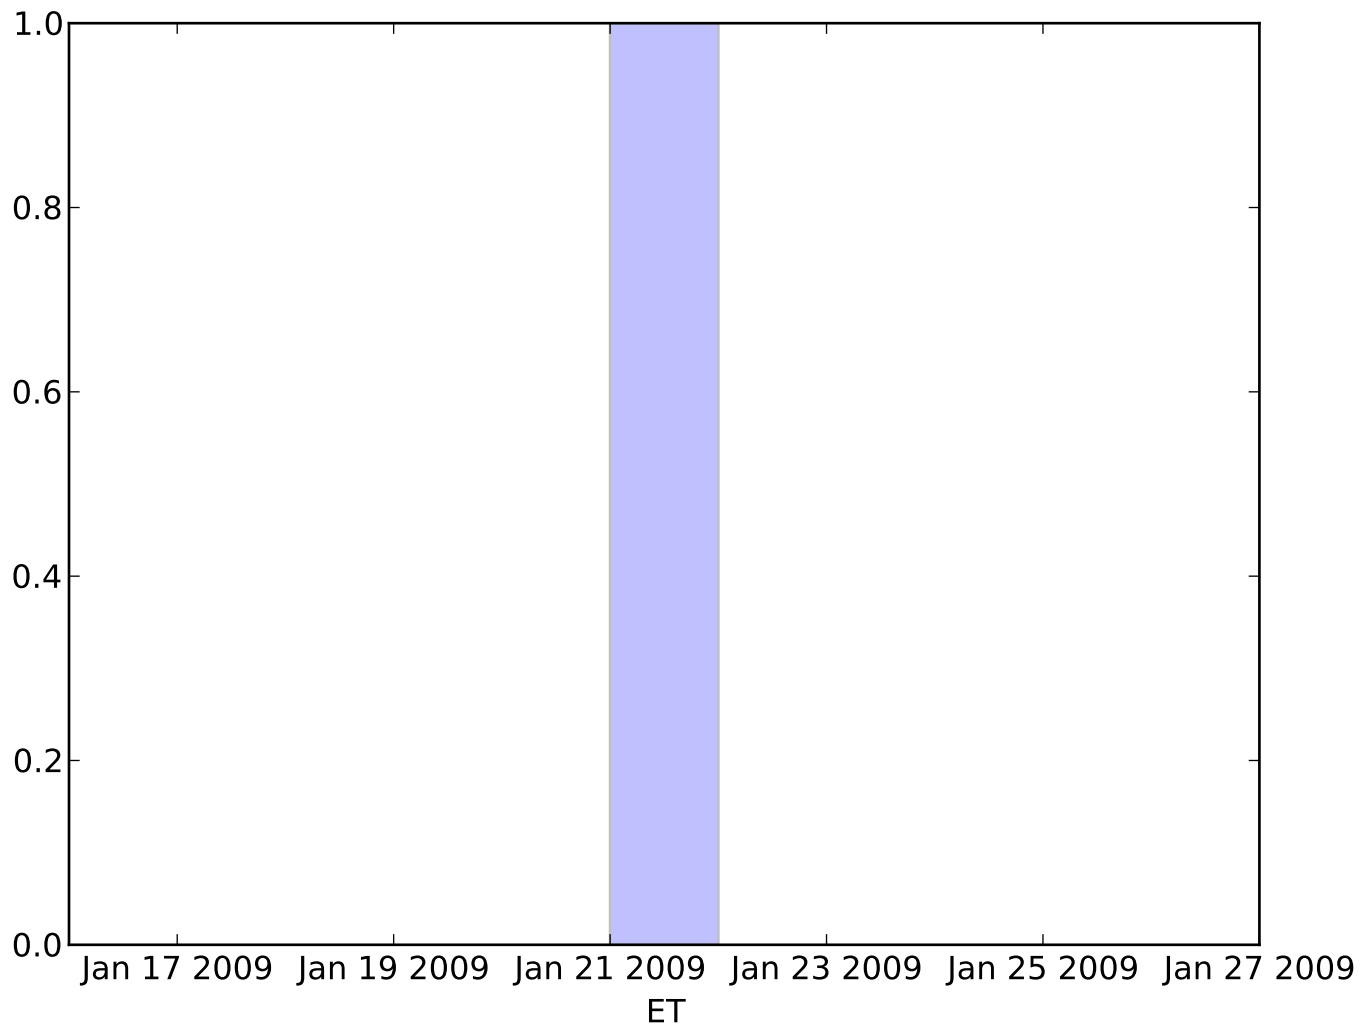

Supplement: Supplementary file 6 [file axvspan_epoch.pdf › Mac OS X/dist/avlog.app/Contents/Resources/lib/python2.7/matplotlib/tests/baseline_images/test_axes/axvspan_epoch.pdf]

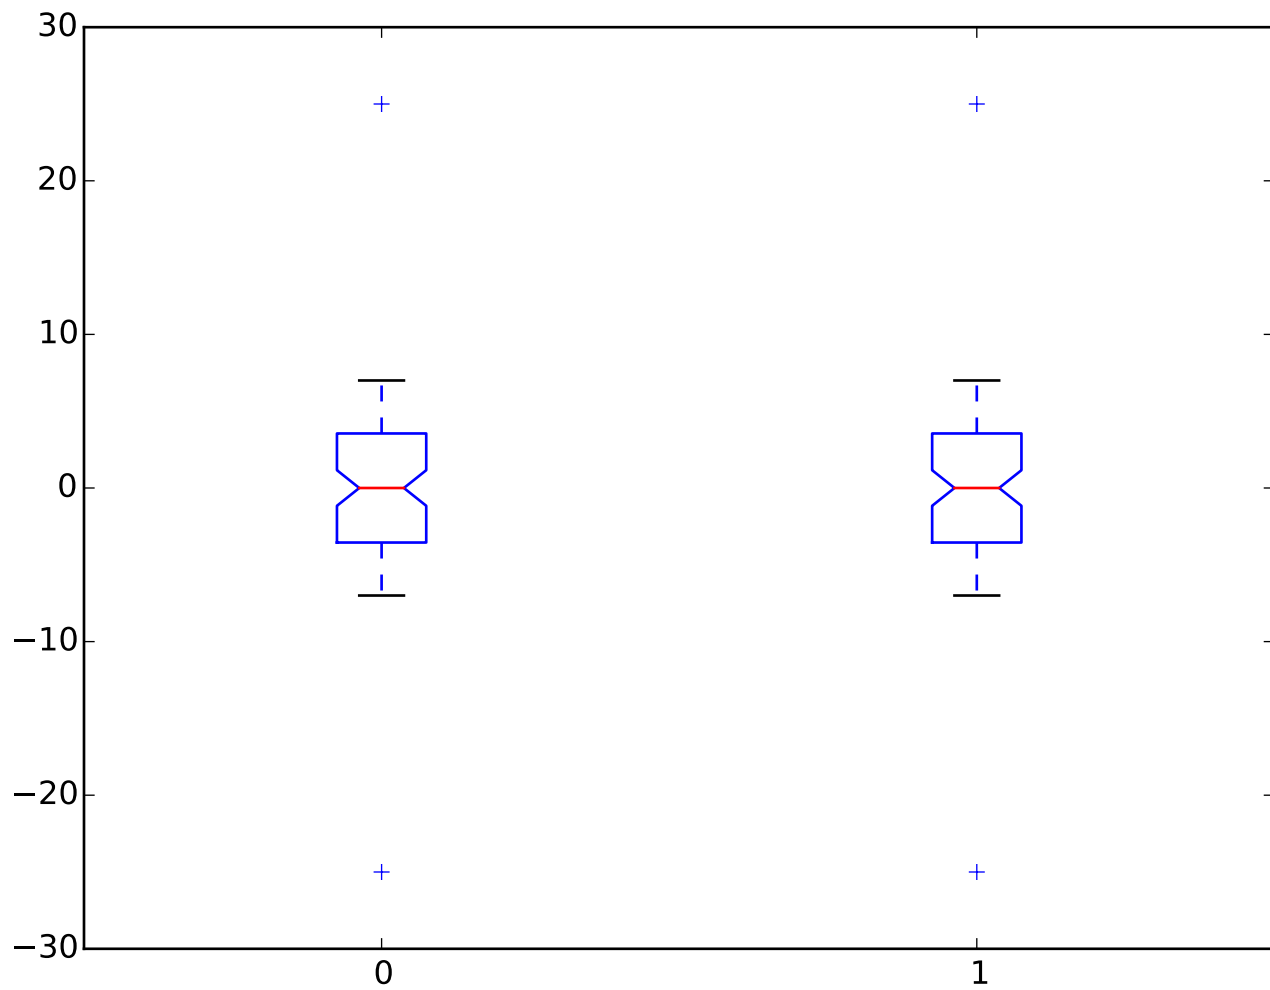

Supplement: Supplementary file 7 [file boxplot.pdf › Mac OS X/dist/avlog.app/Contents/Resources/lib/python2.7/matplotlib/tests/baseline_images/test_axes/boxplot.pdf]

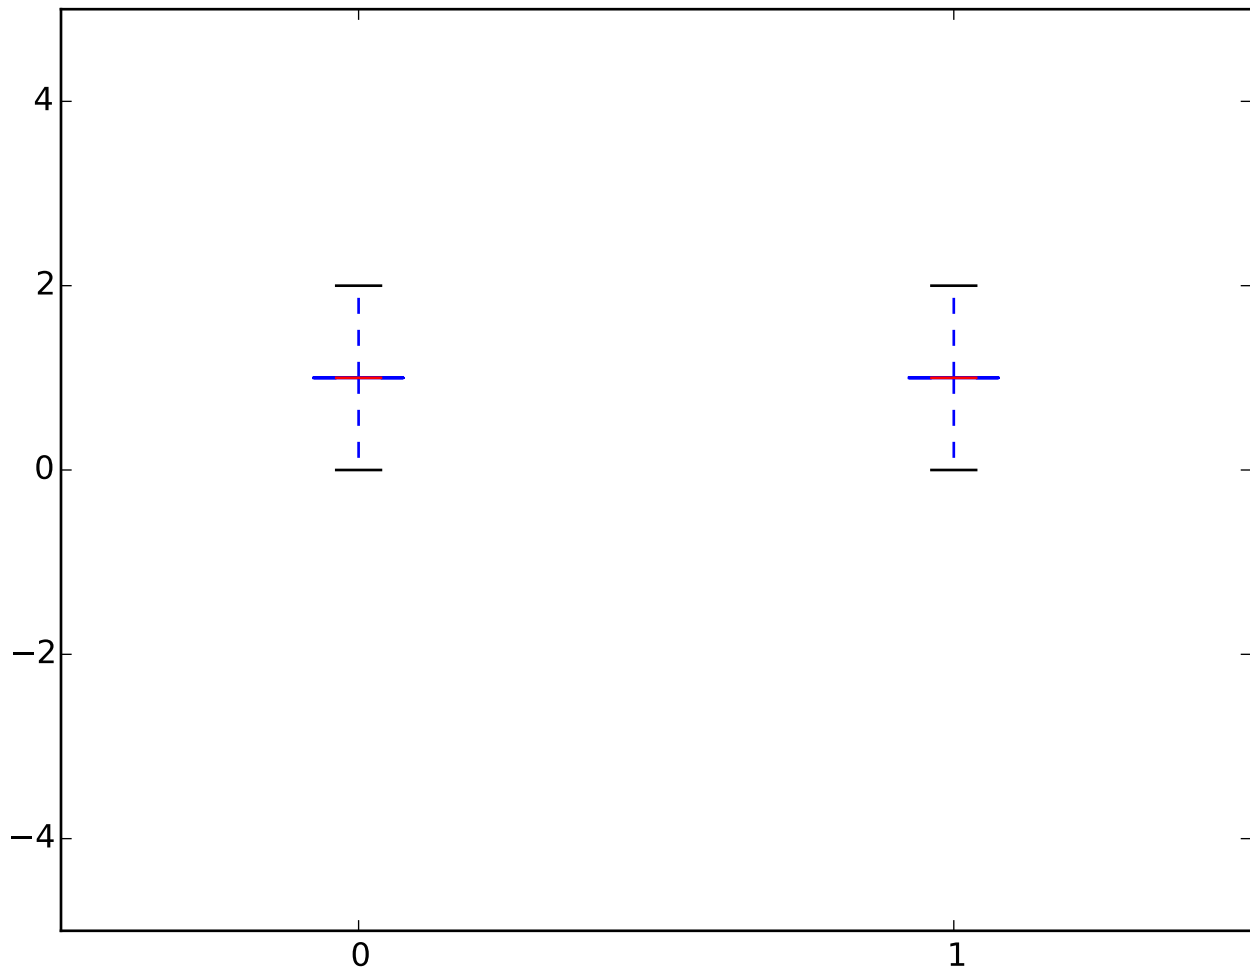

Supplement: Supplementary file 8 [file boxplot_autorange_whiskers.pdf › Mac OS X/dist/avlog.app/Contents/Resources/lib/python2.7/matplotlib/tests/baseline_images/test_axes/boxplot_autorange_whiskers.pdf]

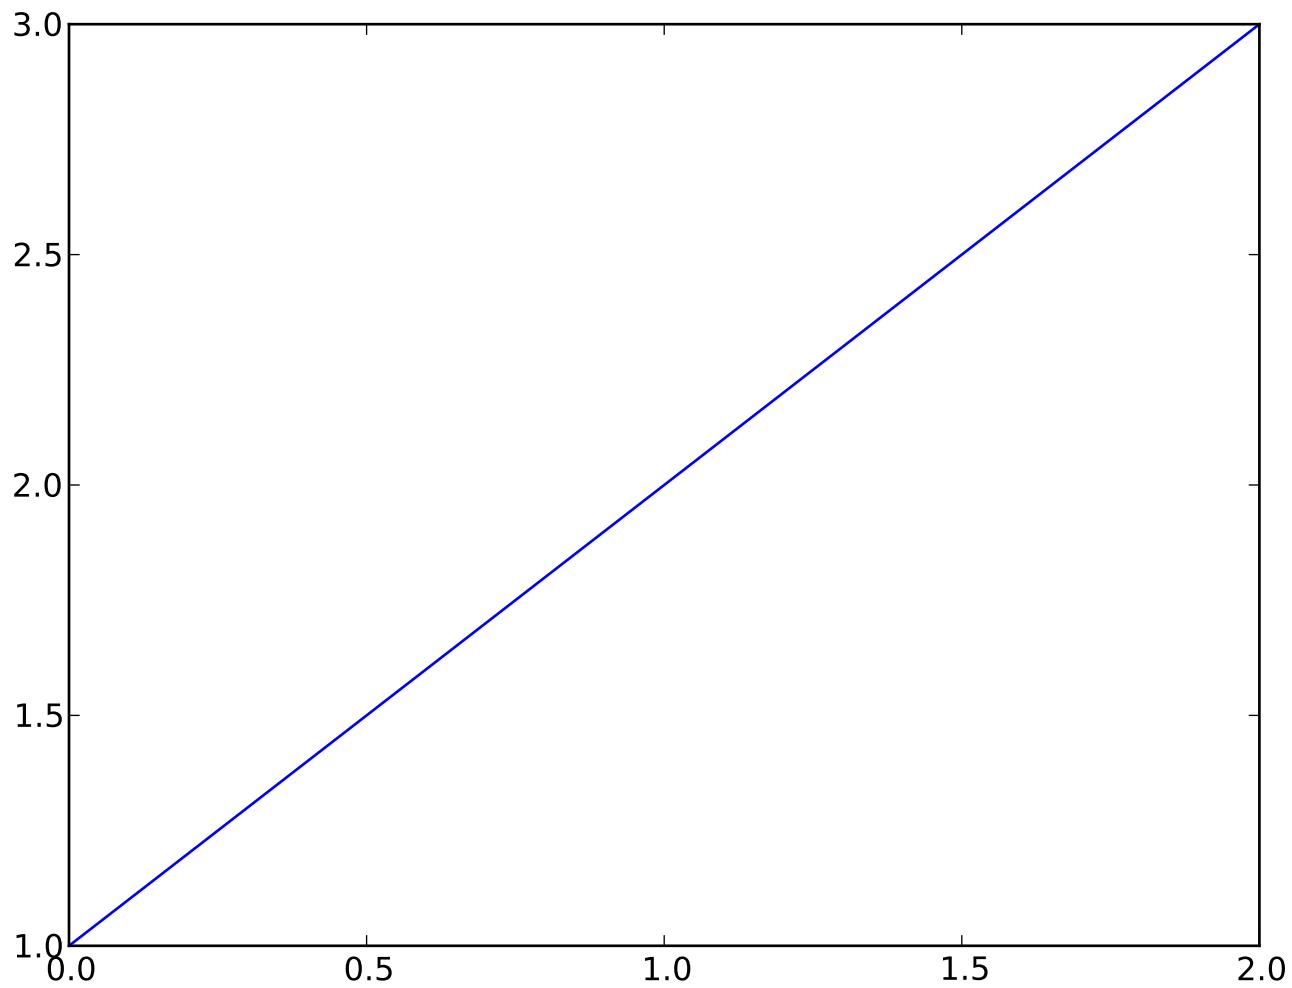

Supplement: Supplementary file 9 [file canonical.pdf › Mac OS X/dist/avlog.app/Contents/Resources/lib/python2.7/matplotlib/tests/baseline_images/test_axes/canonical.pdf]

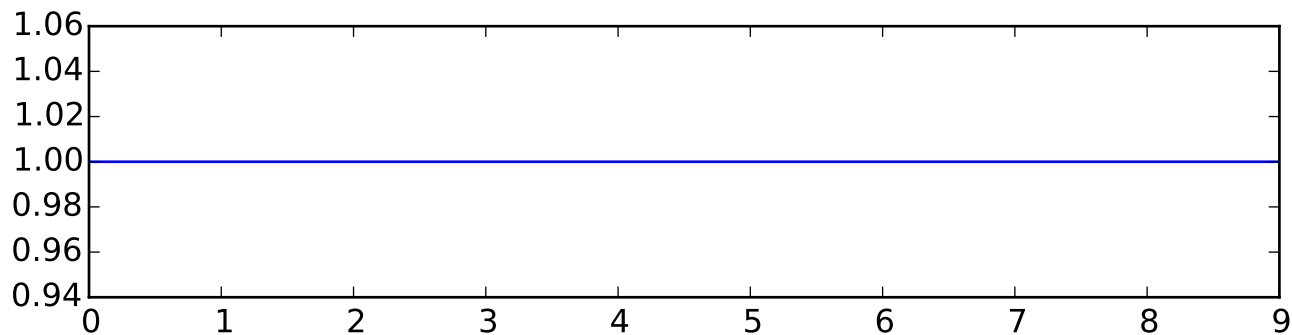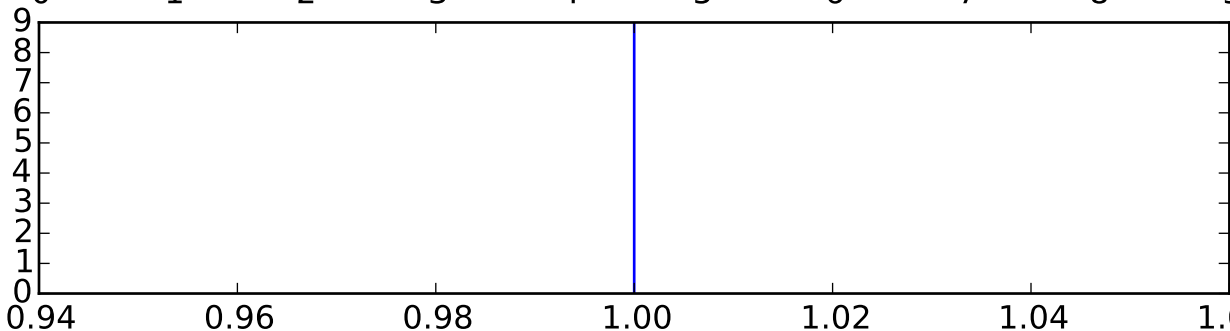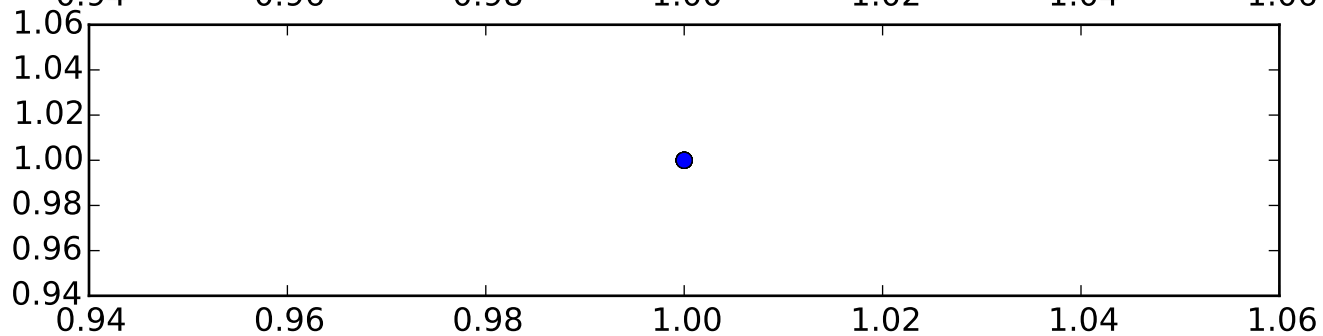

Supplement: Supplementary file 10 [file const_xy.pdf › Mac OS X/dist/avlog.app/Contents/Resources/lib/python2.7/matplotlib/tests/baseline_images/test_axes/const_xy.pdf]

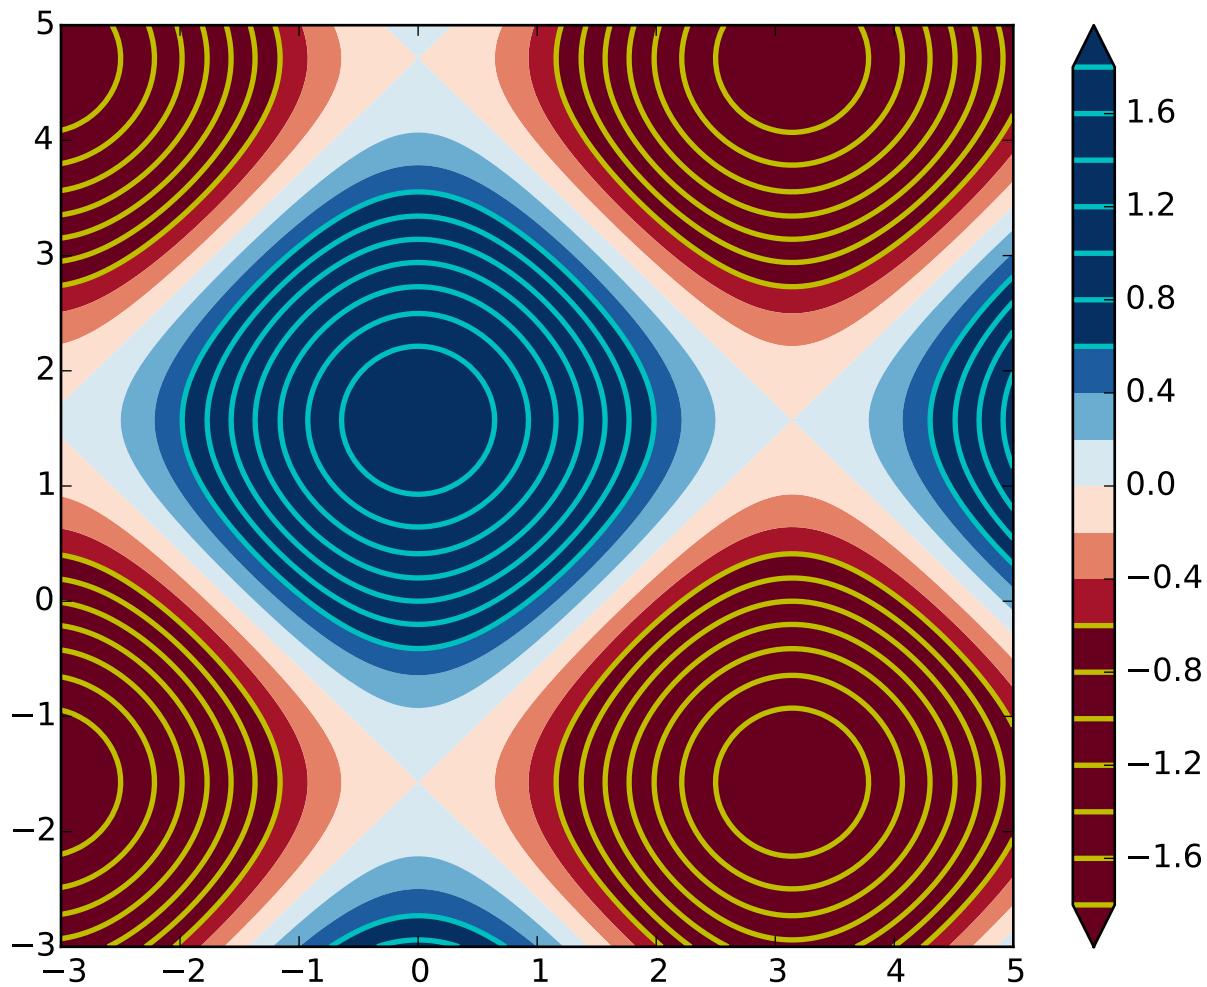

Supplement: Supplementary file 11 [file contour_colorbar.pdf › Mac OS X/dist/avlog.app/Contents/Resources/lib/python2.7/matplotlib/tests/baseline_images/test_axes/contour_colorbar.pdf]

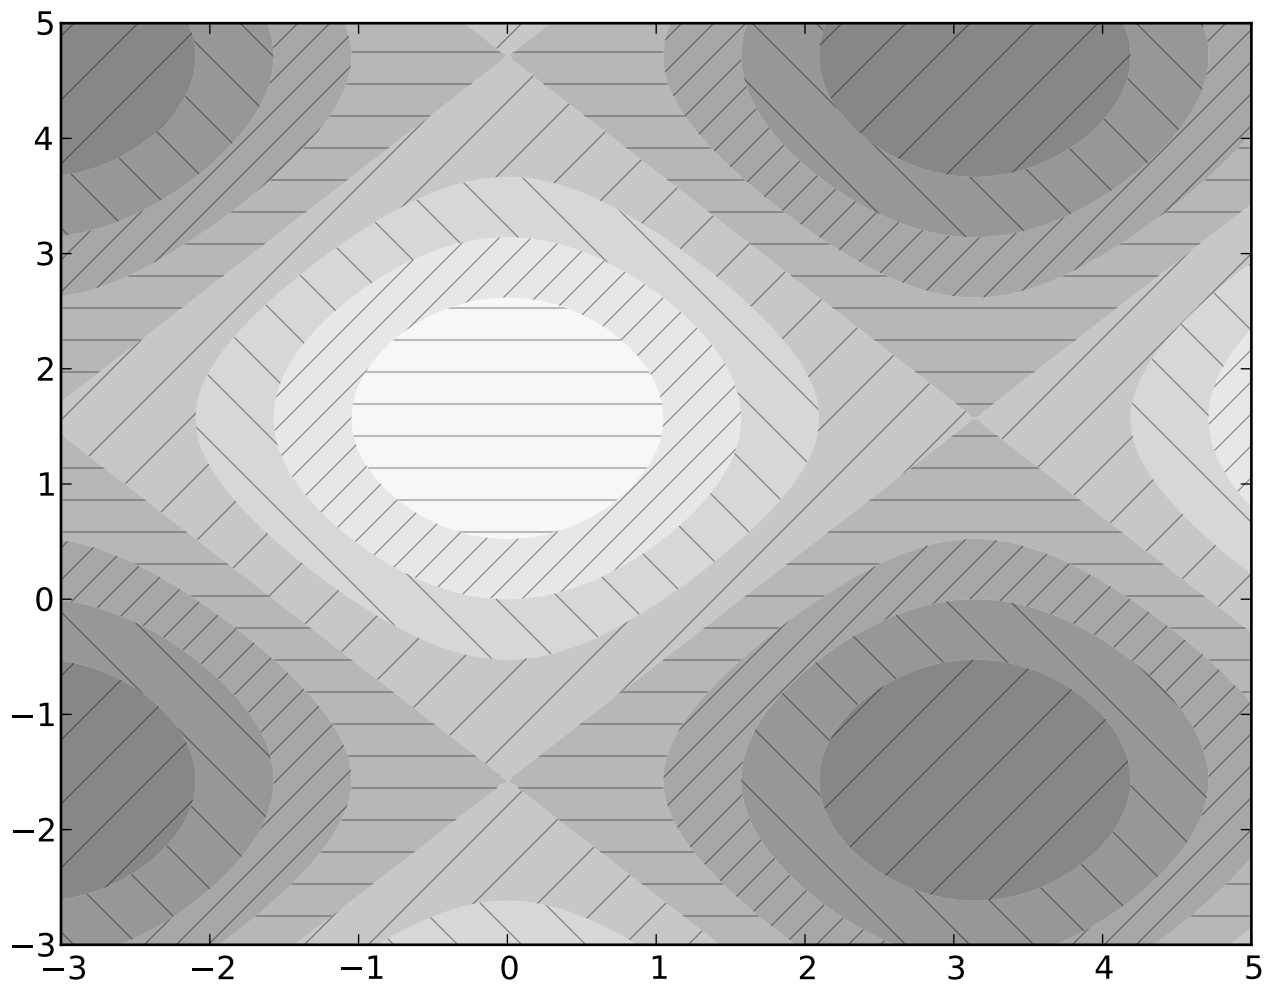

Supplement: Supplementary file 12 [file contour_hatching.pdf › Mac OS X/dist/avlog.app/Contents/Resources/lib/python2.7/matplotlib/tests/baseline_images/test_axes/contour_hatching.pdf]

Simplest errorbars, 0.2 in x, 0.4 in y

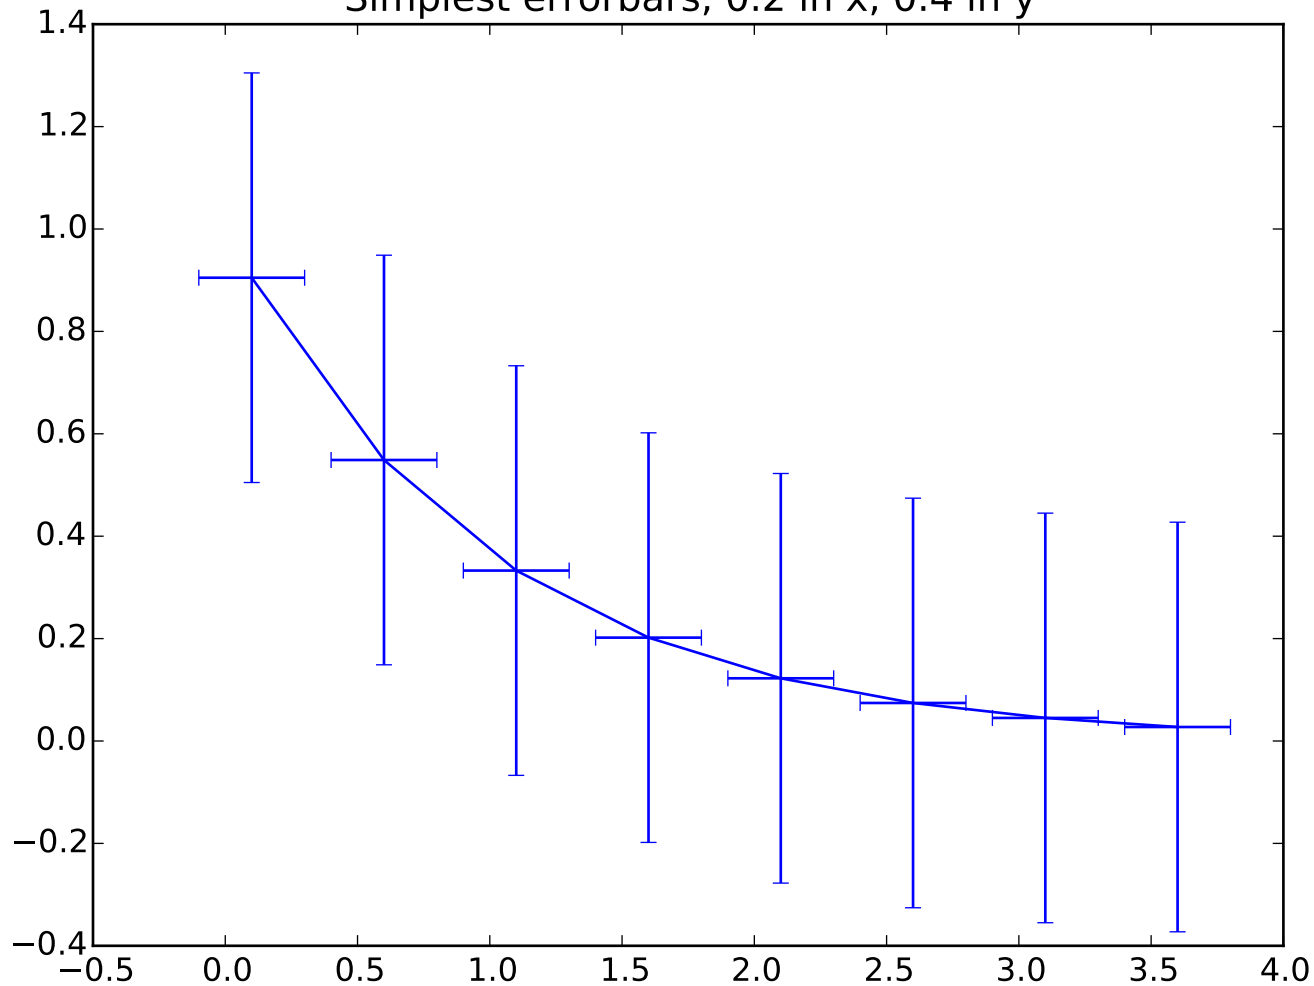

Supplement: Supplementary file 13 [file errorbar_basic.pdf › Mac OS X/dist/avlog.app/Contents/Resources/lib/python2.7/matplotlib/tests/baseline_images/test_axes/errorbar_basic.pdf]

Errorbar upper and lower limits

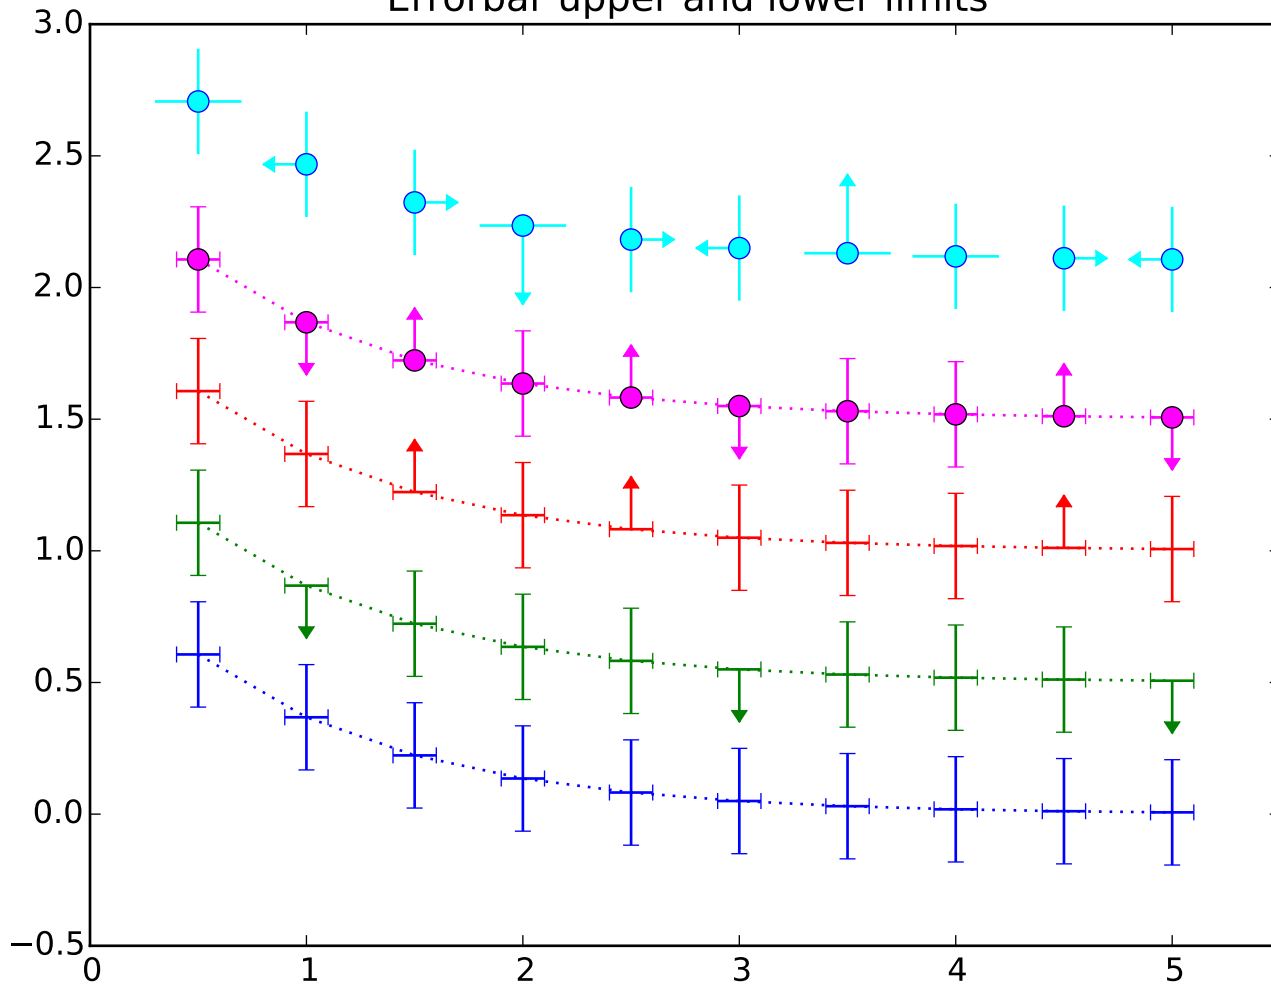

Supplement: Supplementary file 14 [file errorbar_limits.pdf › Mac OS X/dist/avlog.app/Contents/Resources/lib/python2.7/matplotlib/tests/baseline_images/test_axes/errorbar_limits.pdf]

# Variable errorbars

## Vert. symmetric

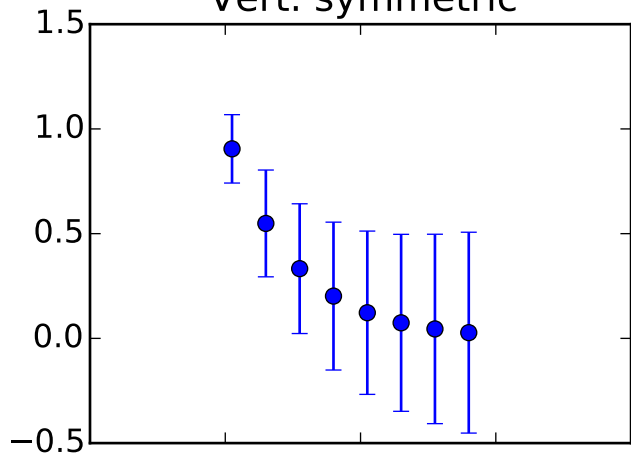

## Hor. symmetric w/ alpha

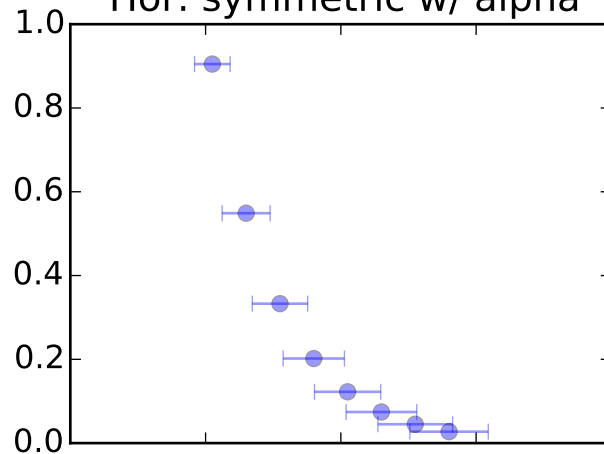

## H, V asymmetric

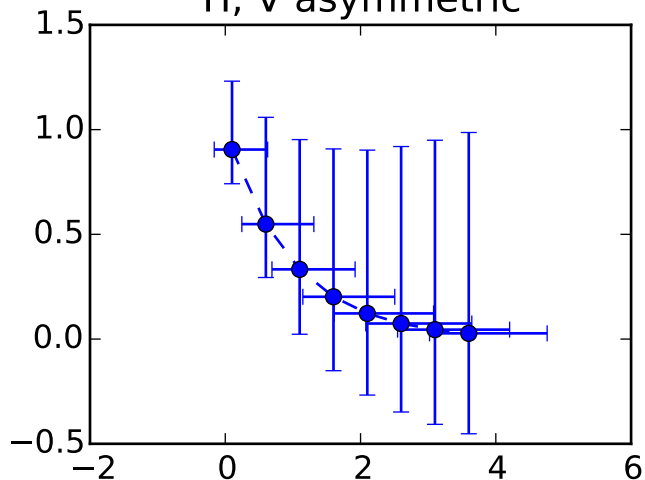

## Mixed sym., log y

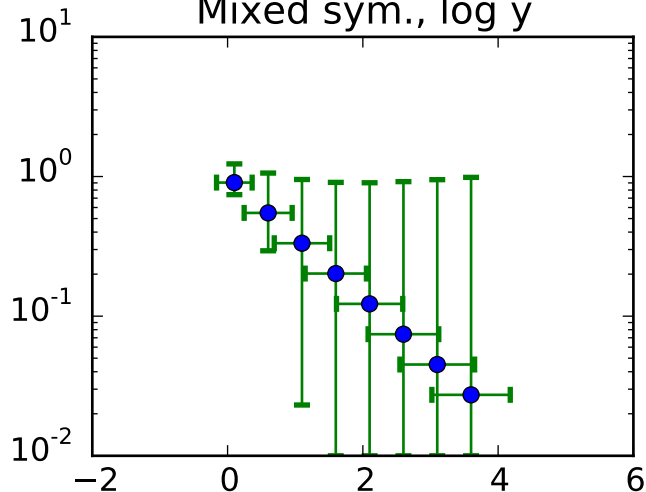

Supplement: Supplementary file 15 [file errorbar_mixed.pdf › Mac OS X/dist/avlog.app/Contents/Resources/lib/python2.7/matplotlib/tests/baseline_images/test_axes/errorbar_mixed.pdf]

errorbar zorder test

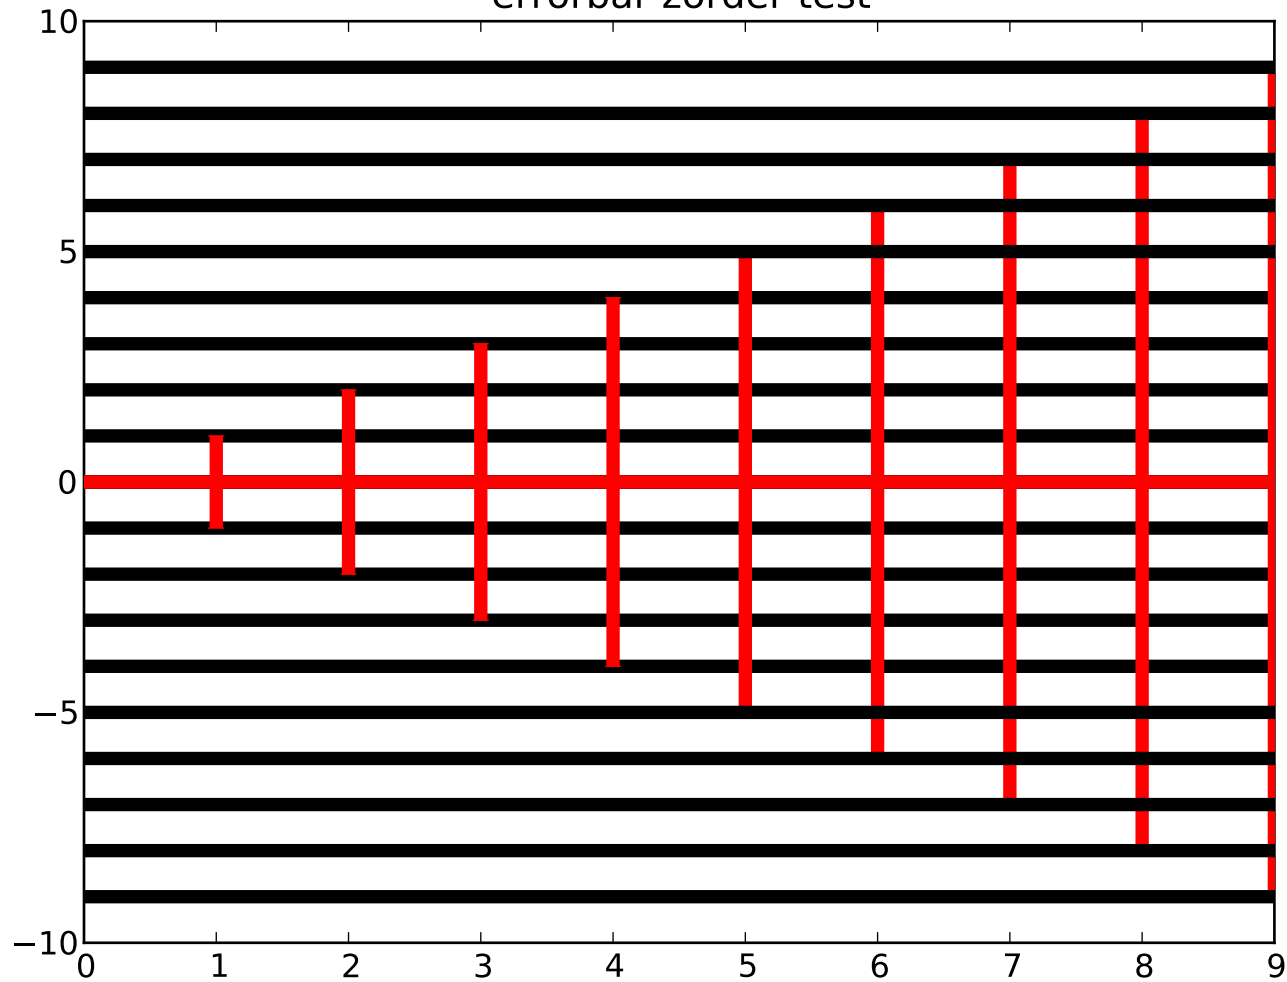

Supplement: Supplementary file 16 [file errorbar_zorder.pdf › Mac OS X/dist/avlog.app/Contents/Resources/lib/python2.7/matplotlib/tests/baseline_images/test_axes/errorbar_zorder.pdf]

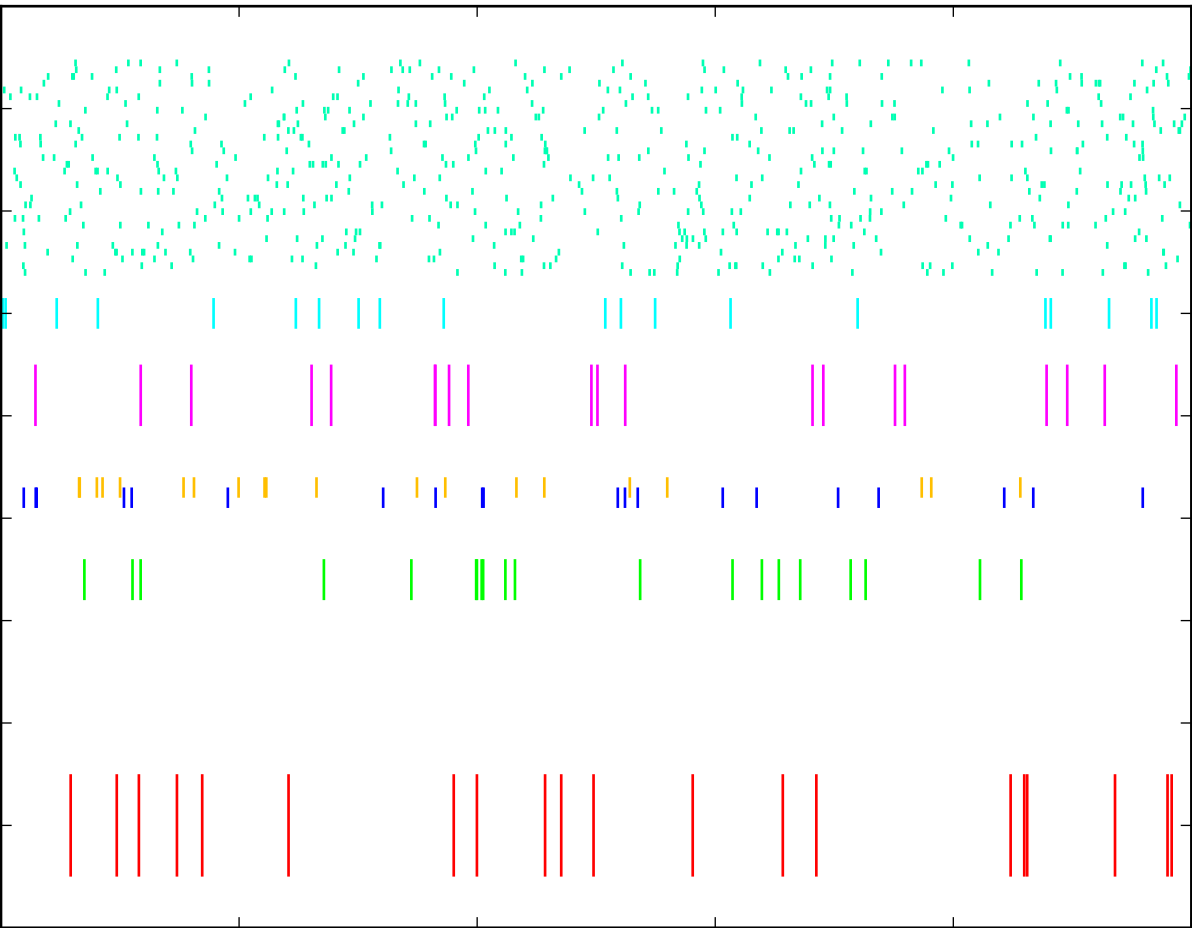

Supplement: Supplementary file 17 [file eventplot.pdf › Mac OS X/dist/avlog.app/Contents/Resources/lib/python2.7/matplotlib/tests/baseline_images/test_axes/eventplot.pdf]

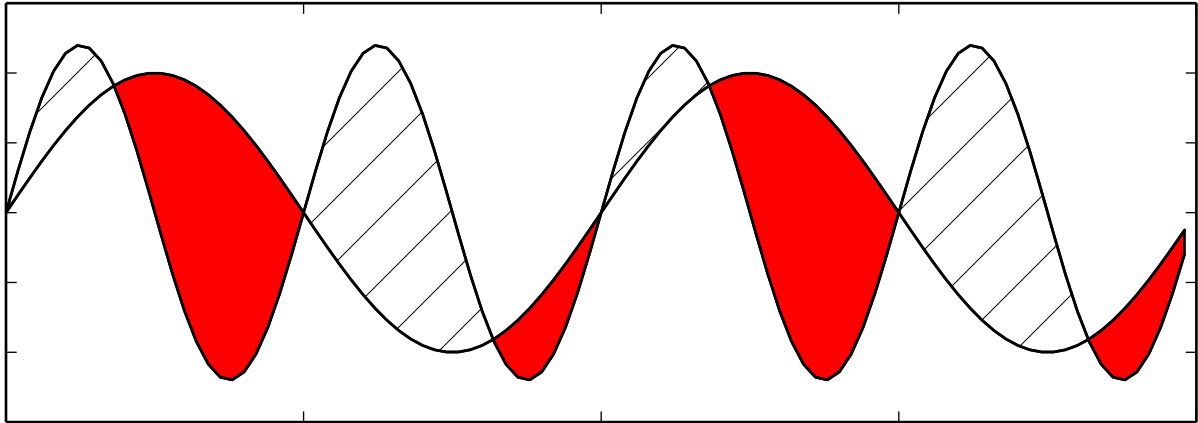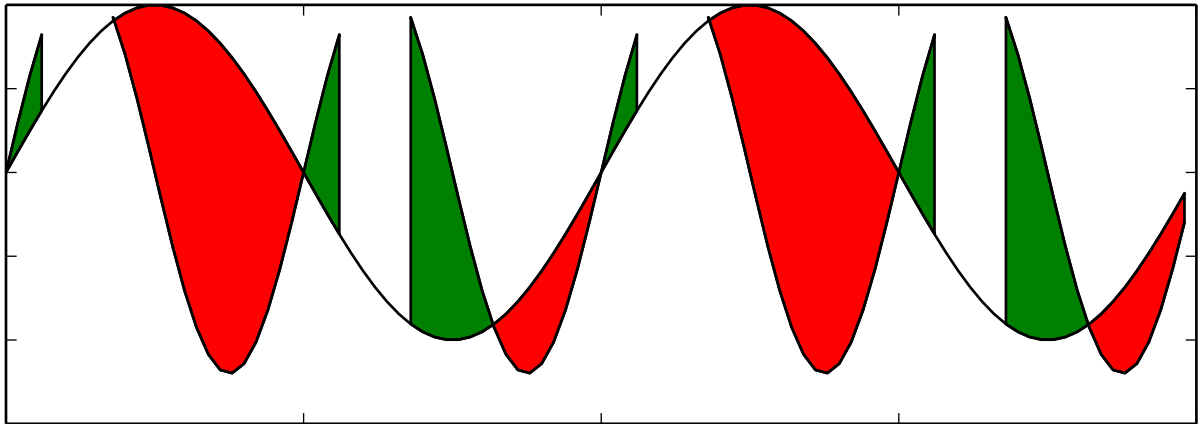

Supplement: Supplementary file 18 [file fill_between_interpolate.pdf › Mac OS X/dist/avlog.app/Contents/Resources/lib/python2.7/matplotlib/tests/baseline_images/test_axes/fill_between_interpolate.pdf]

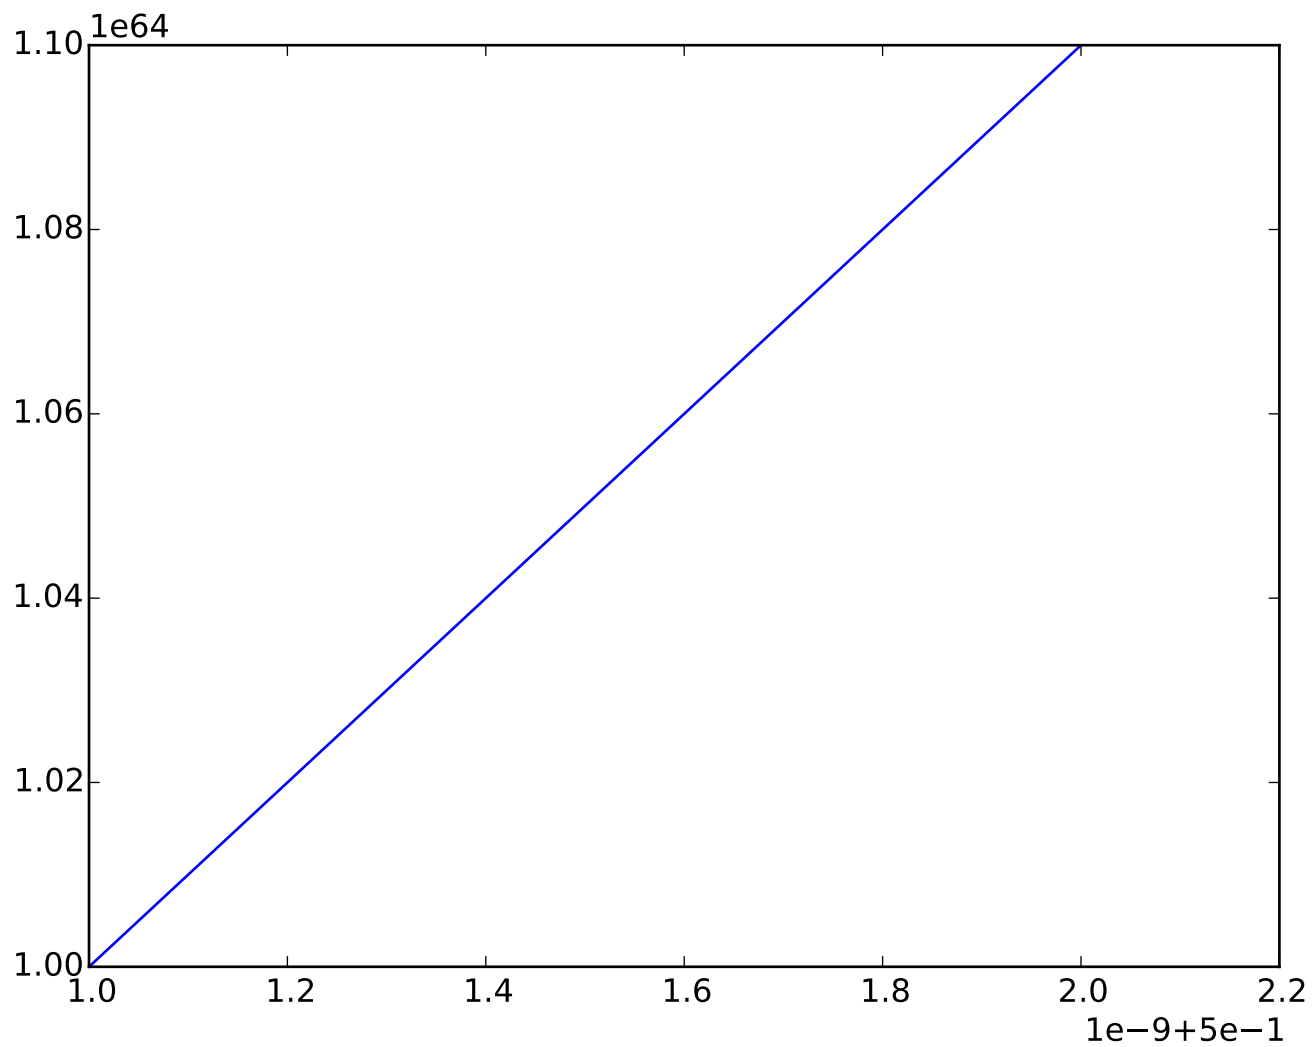

Supplement: Supplementary file 19 [file formatter_large_small.pdf › Mac OS X/dist/avlog.app/Contents/Resources/lib/python2.7/matplotlib/tests/baseline_images/test_axes/formatter_large_small.pdf]

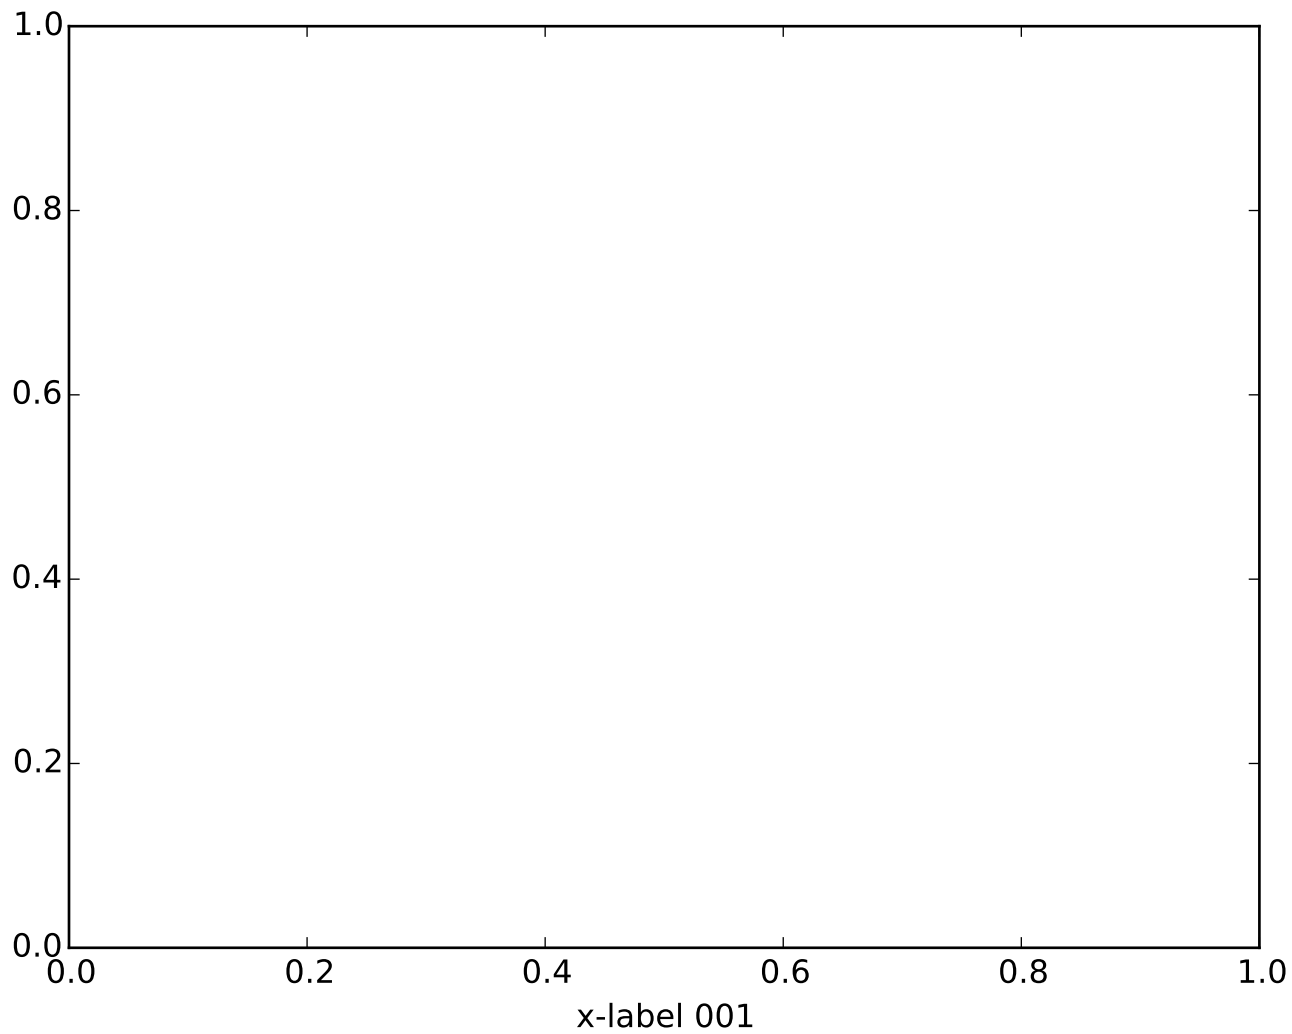

Supplement: Supplementary file 20 [file formatter_ticker_001.pdf › Mac OS X/dist/avlog.app/Contents/Resources/lib/python2.7/matplotlib/tests/baseline_images/test_axes/formatter_ticker_001.pdf]

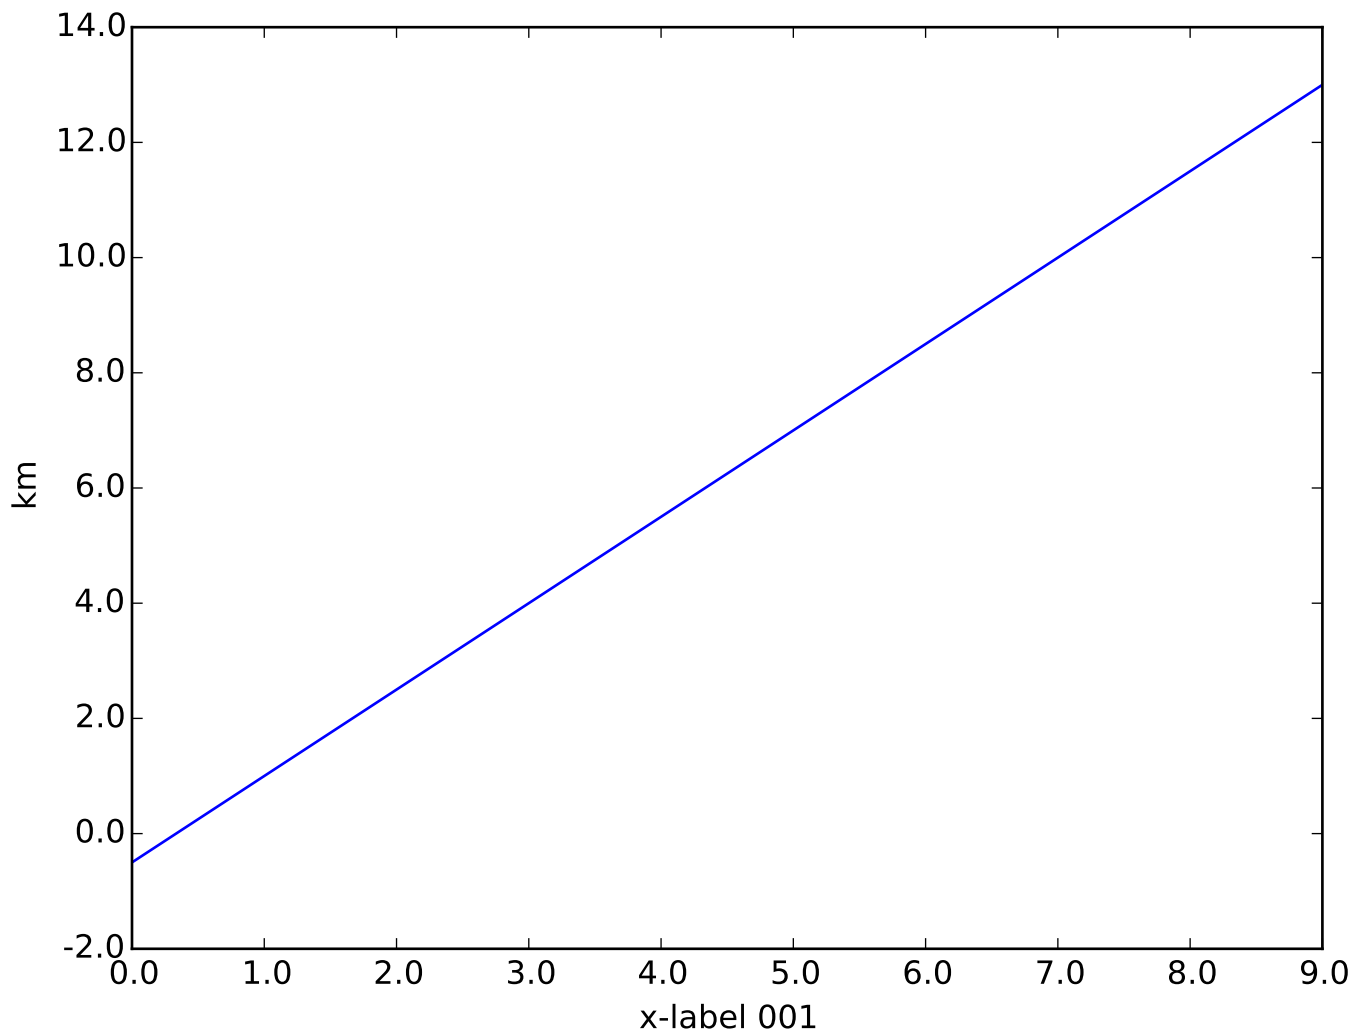

Supplement: Supplementary file 21 [file formatter_ticker_002.pdf › Mac OS X/dist/avlog.app/Contents/Resources/lib/python2.7/matplotlib/tests/baseline_images/test_axes/formatter_ticker_002.pdf]

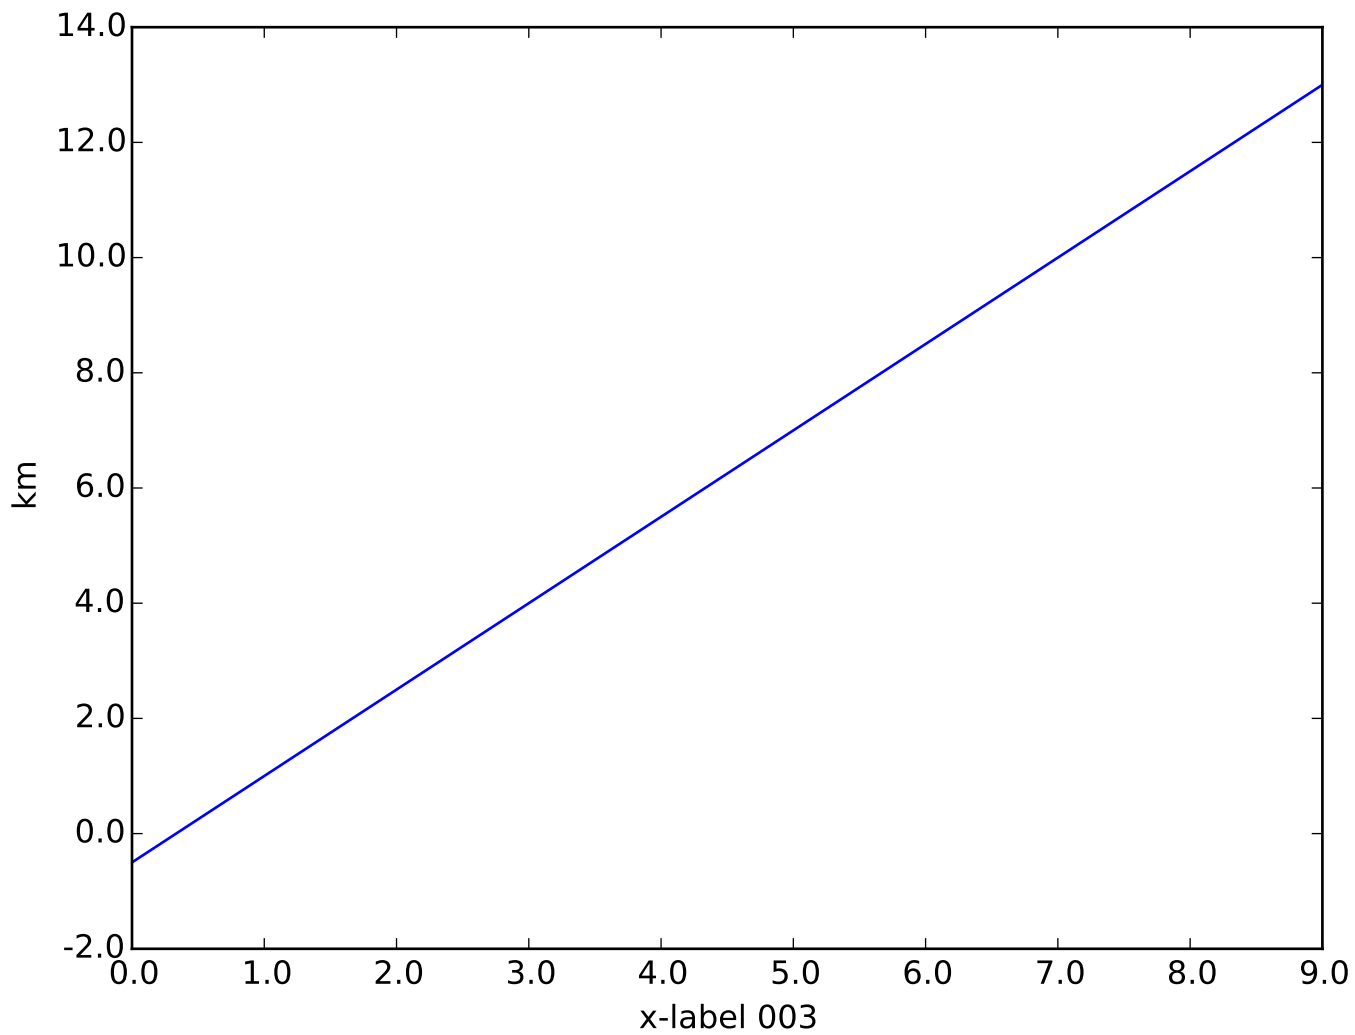

Supplement: Supplementary file 22 [file formatter_ticker_003.pdf › Mac OS X/dist/avlog.app/Contents/Resources/lib/python2.7/matplotlib/tests/baseline_images/test_axes/formatter_ticker_003.pdf]

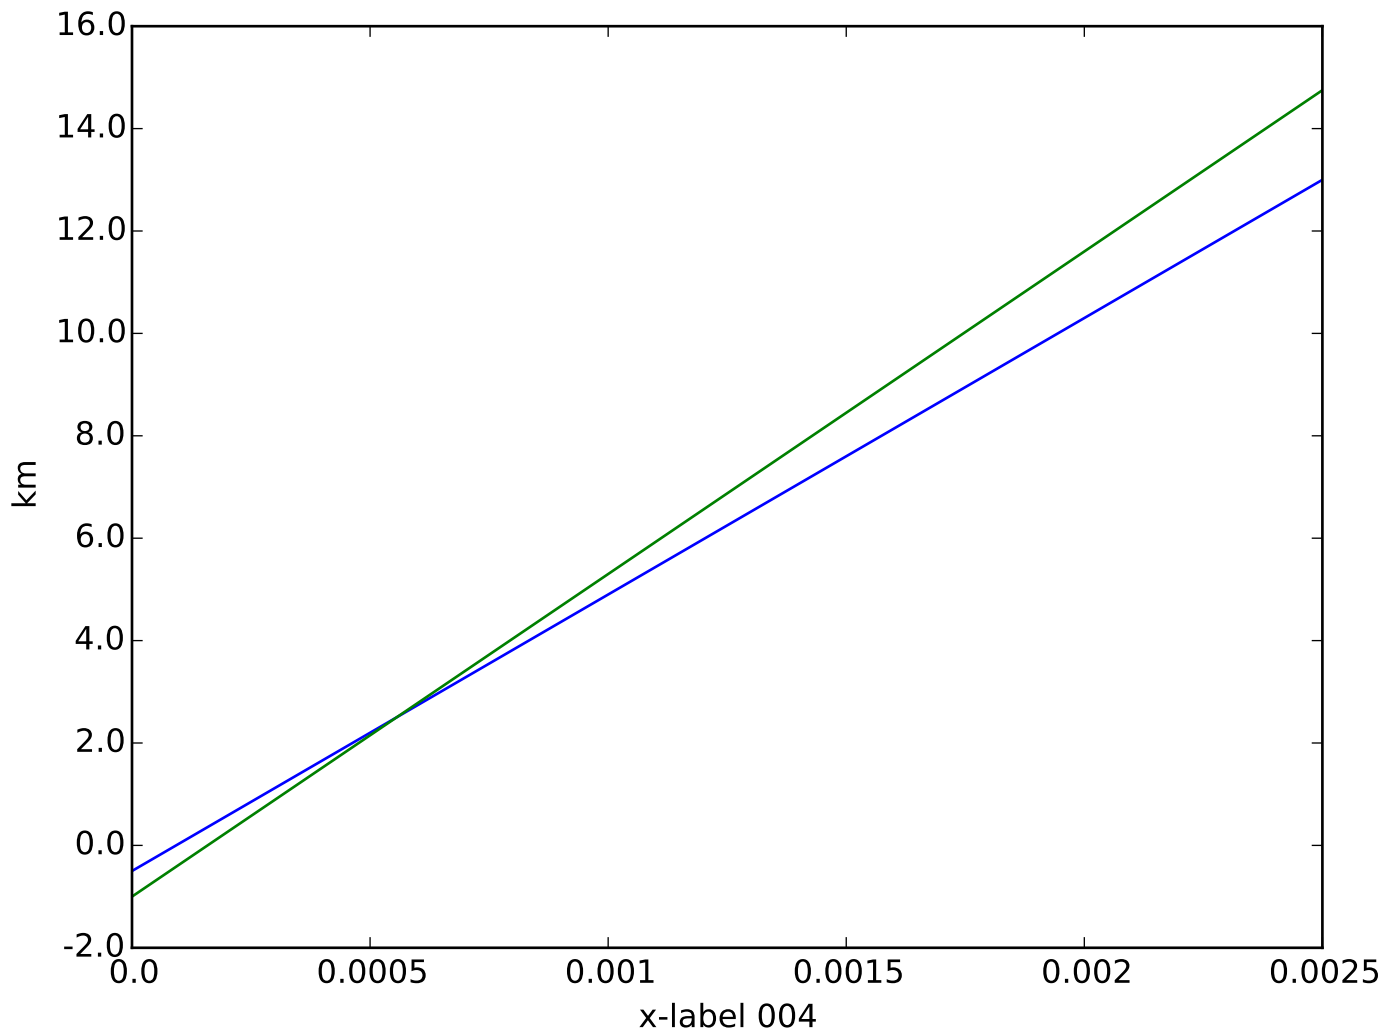

Supplement: Supplementary file 23 [file formatter_ticker_004.pdf › Mac OS X/dist/avlog.app/Contents/Resources/lib/python2.7/matplotlib/tests/baseline_images/test_axes/formatter_ticker_004.pdf]

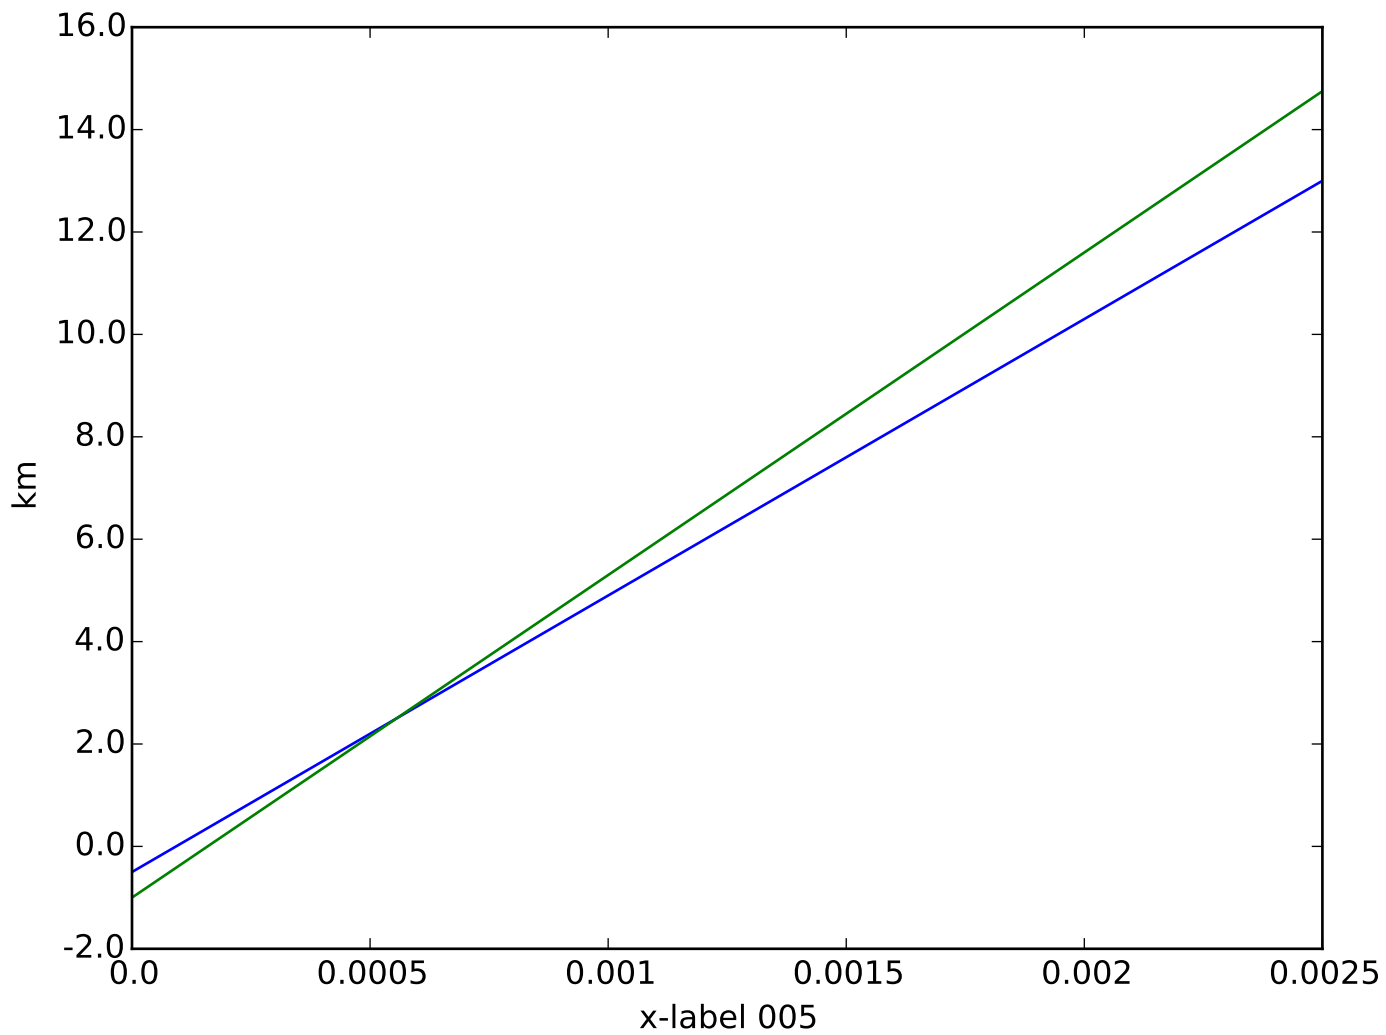

Supplement: Supplementary file 24 [file formatter_ticker_005.pdf › Mac OS X/dist/avlog.app/Contents/Resources/lib/python2.7/matplotlib/tests/baseline_images/test_axes/formatter_ticker_005.pdf]

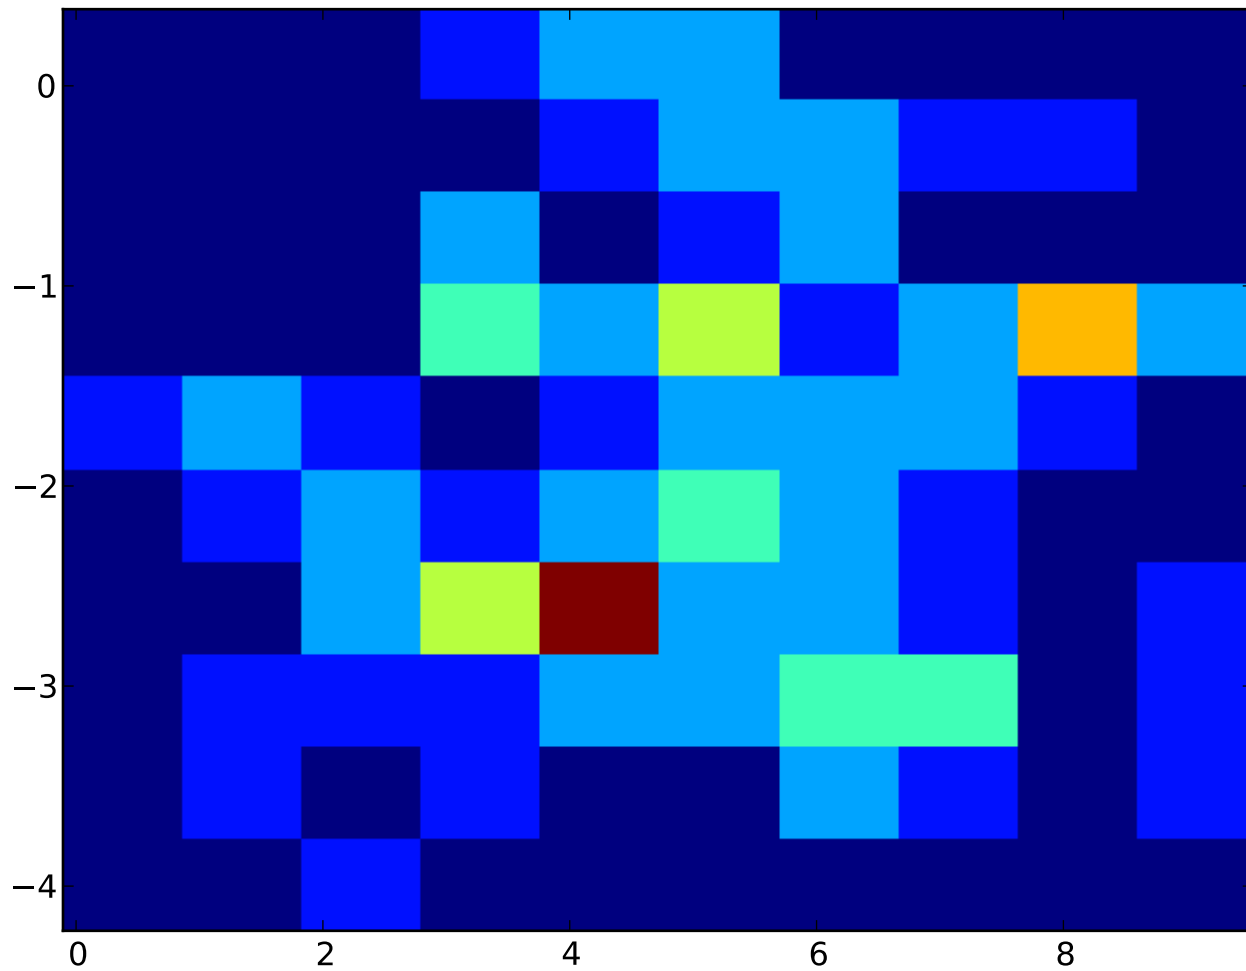

Supplement: Supplementary file 25 [file hist2d.pdf › Mac OS X/dist/avlog.app/Contents/Resources/lib/python2.7/matplotlib/tests/baseline_images/test_axes/hist2d.pdf]

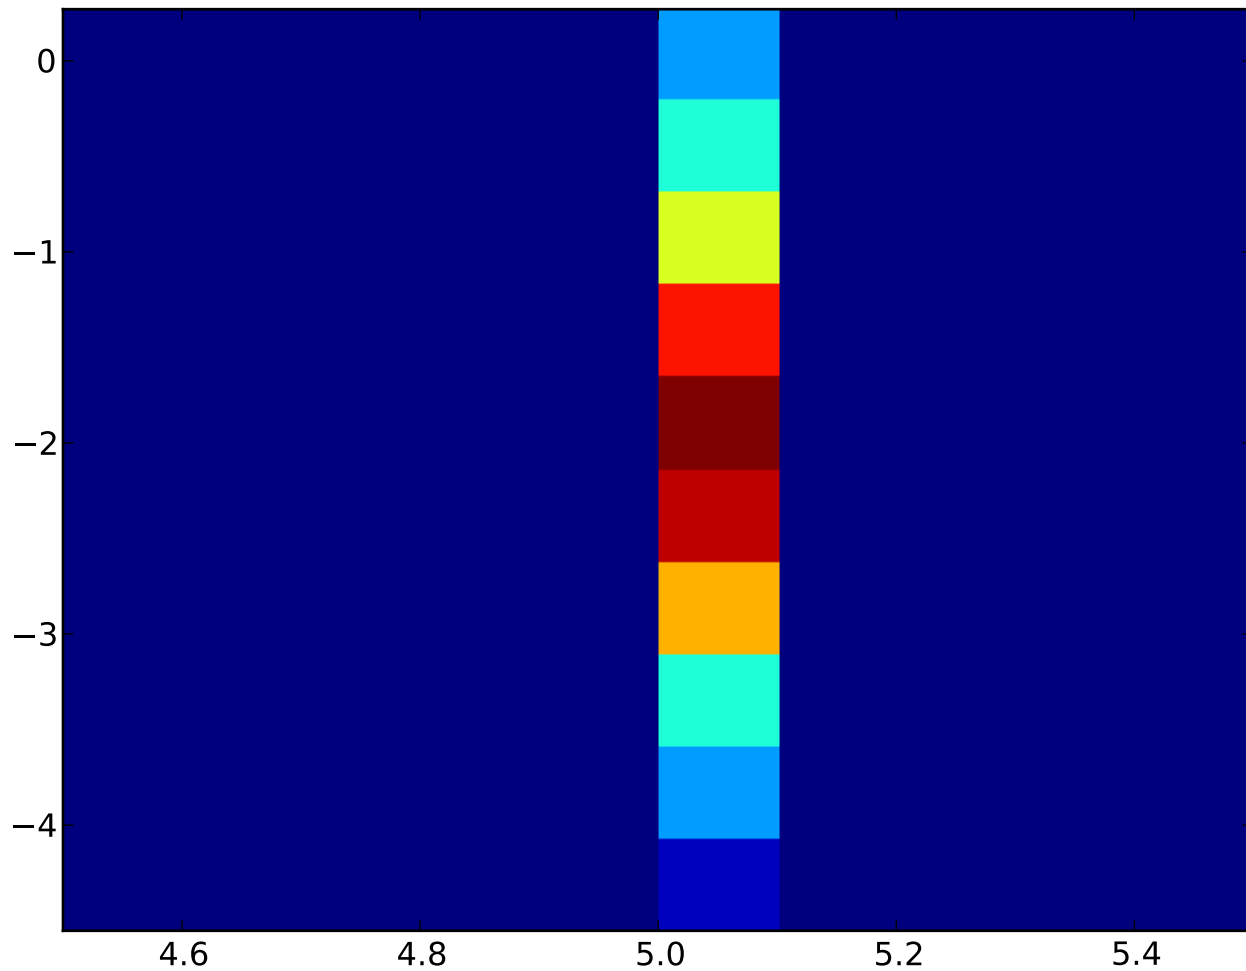

Supplement: Supplementary file 26 [file hist2d_transpose.pdf › Mac OS X/dist/avlog.app/Contents/Resources/lib/python2.7/matplotlib/tests/baseline_images/test_axes/hist2d_transpose.pdf]

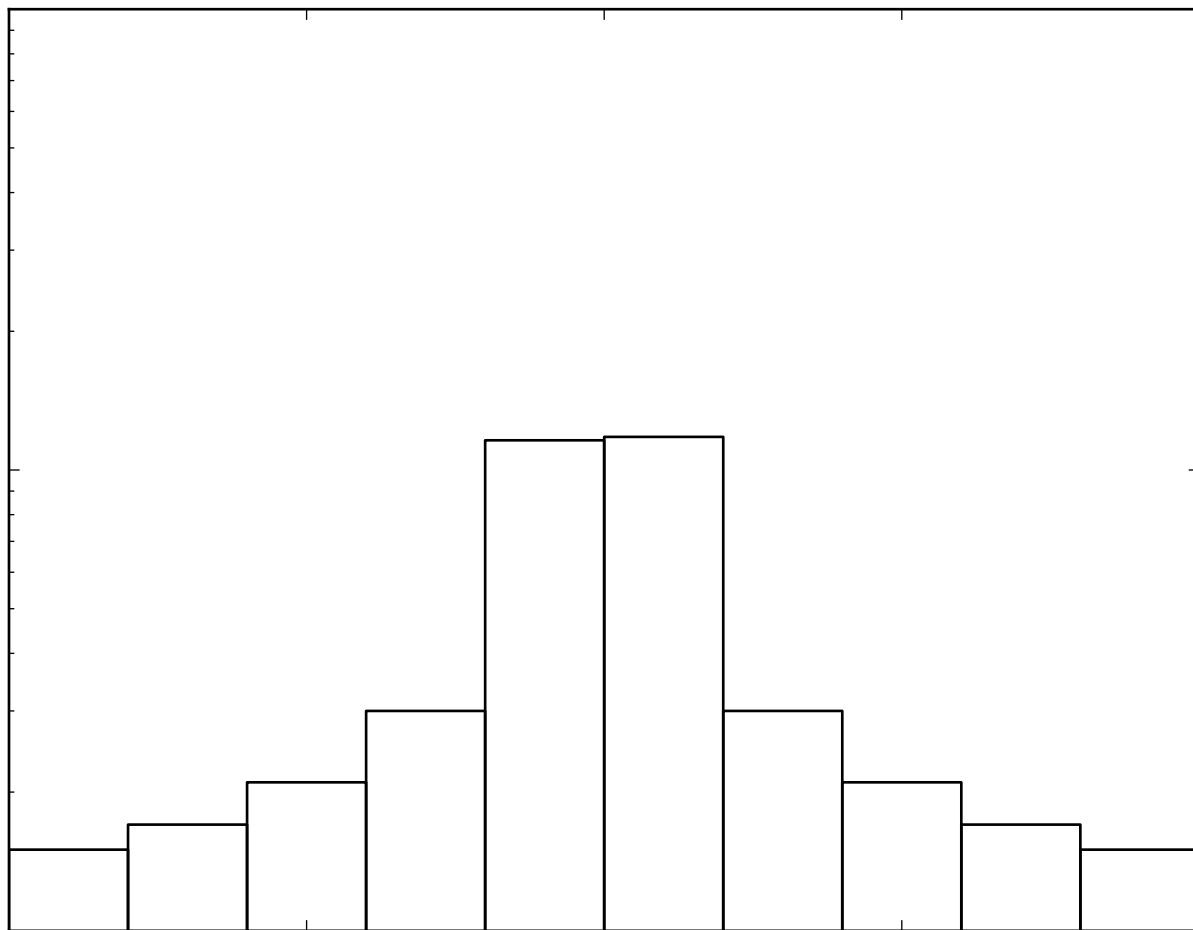

Supplement: Supplementary file 27 [file hist_log.pdf › Mac OS X/dist/avlog.app/Contents/Resources/lib/python2.7/matplotlib/tests/baseline_images/test_axes/hist_log.pdf]

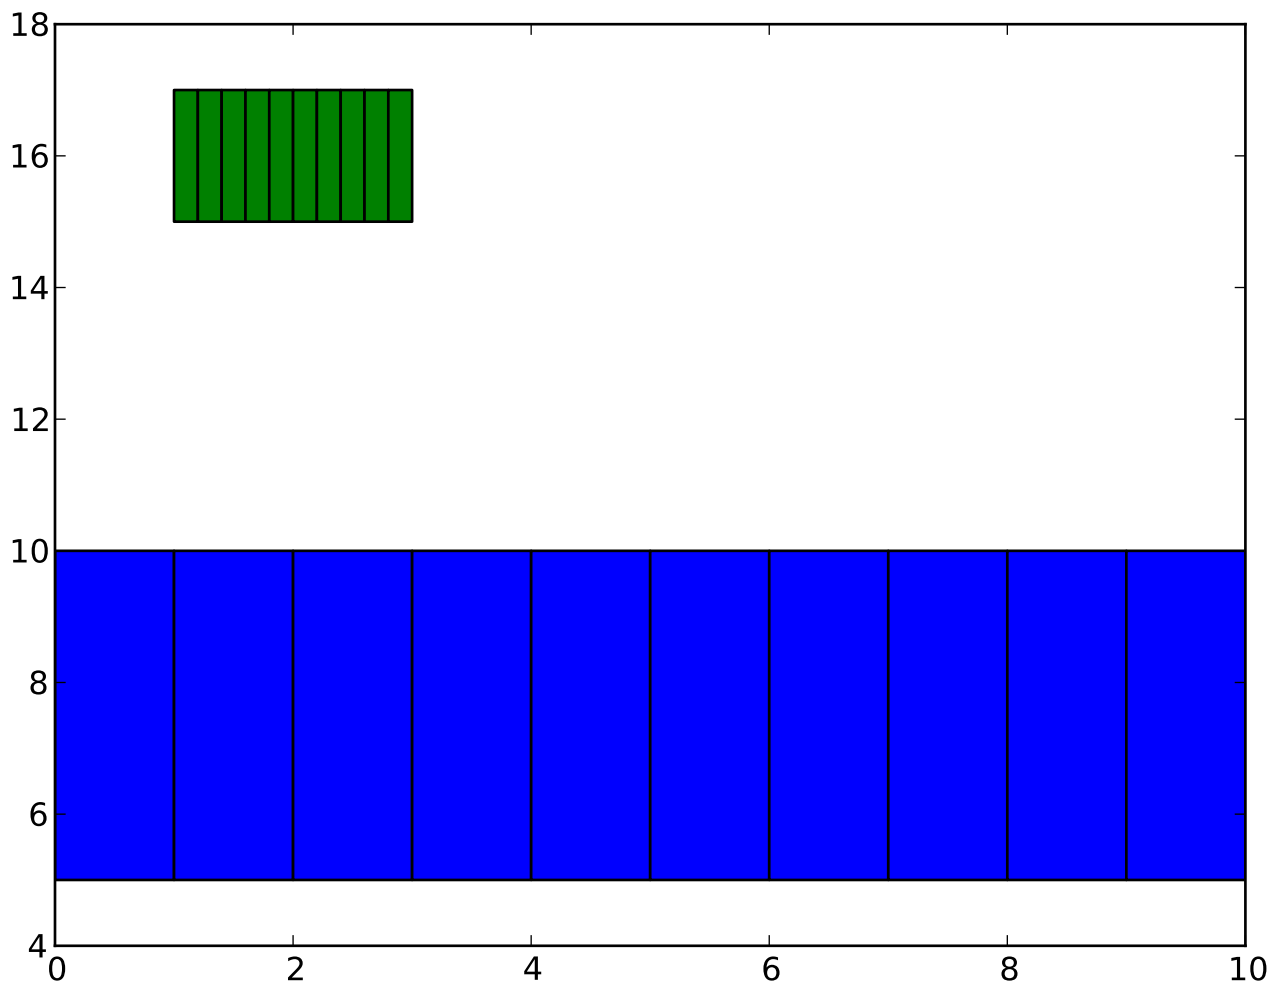

Supplement: Supplementary file 28 [file hist_offset.pdf › Mac OS X/dist/avlog.app/Contents/Resources/lib/python2.7/matplotlib/tests/baseline_images/test_axes/hist_offset.pdf]

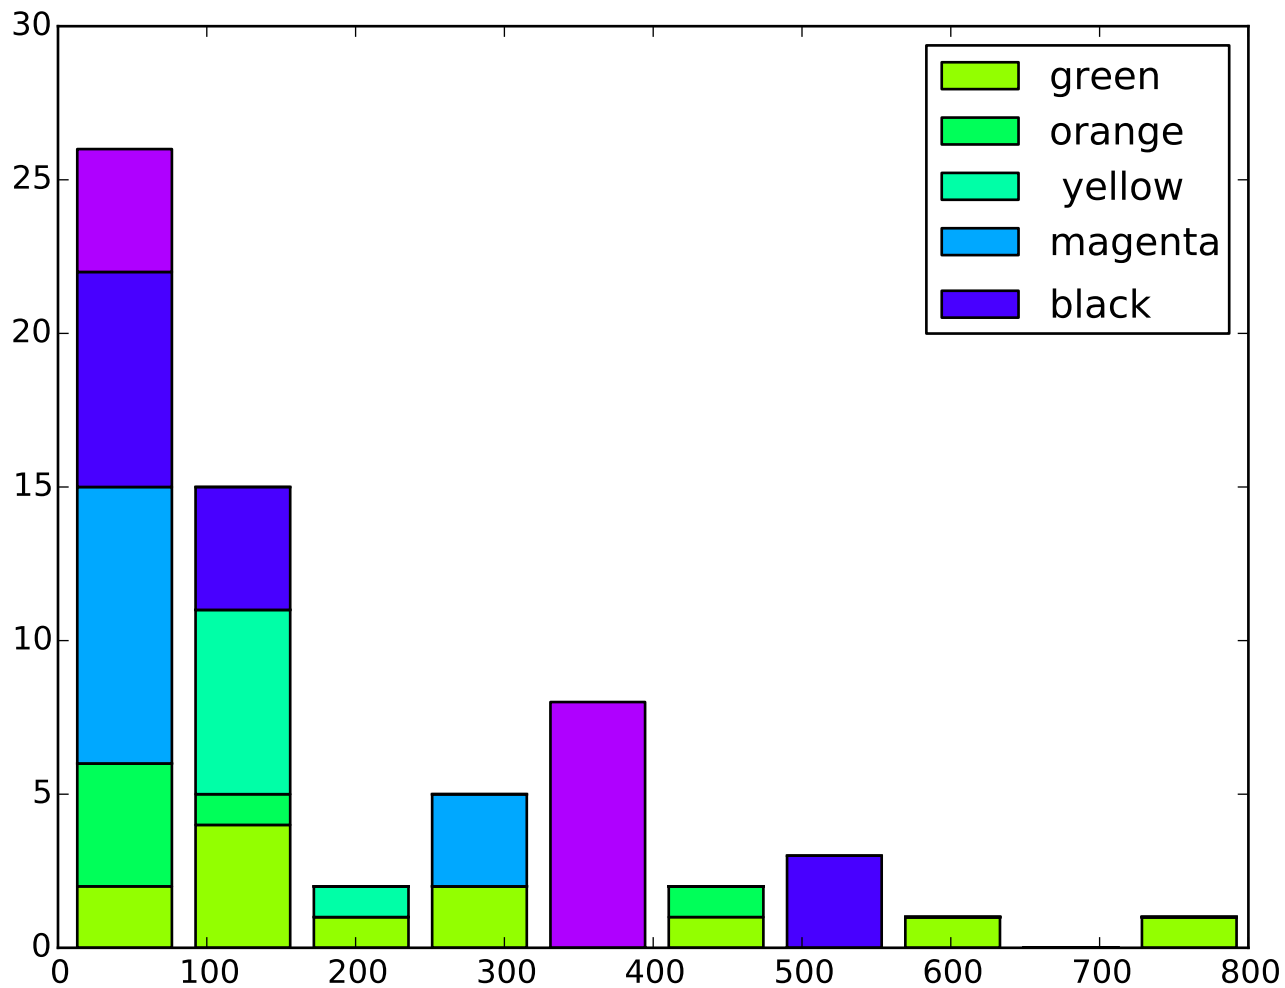

Supplement: Supplementary file 29 [file hist_stacked_bar.pdf › Mac OS X/dist/avlog.app/Contents/Resources/lib/python2.7/matplotlib/tests/baseline_images/test_axes/hist_stacked_bar.pdf]

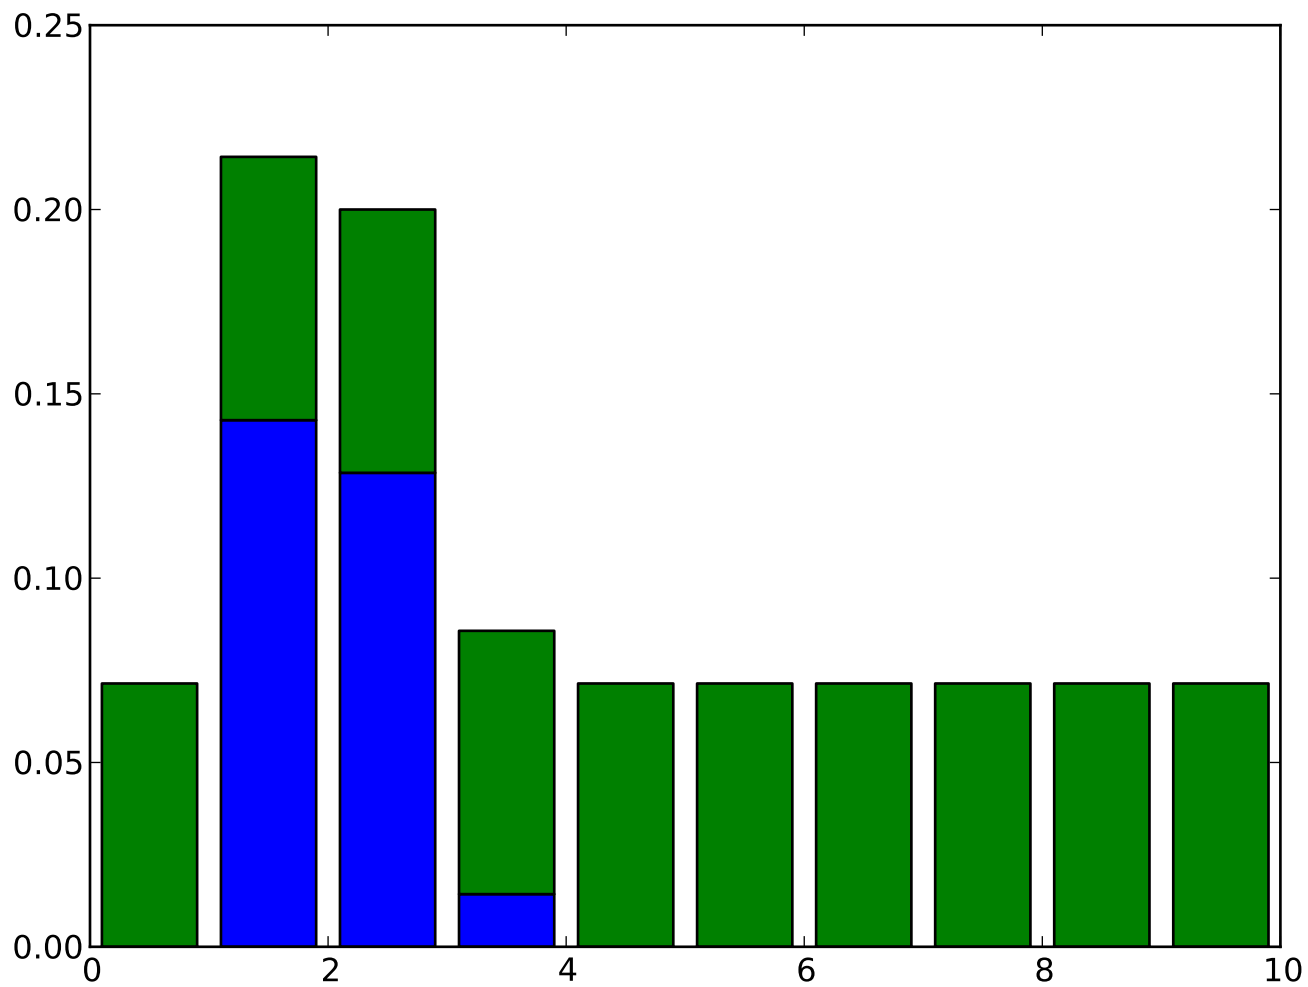

Supplement: Supplementary file 30 [file hist_stacked_normed.pdf › Mac OS X/dist/avlog.app/Contents/Resources/lib/python2.7/matplotlib/tests/baseline_images/test_axes/hist_stacked_normed.pdf]

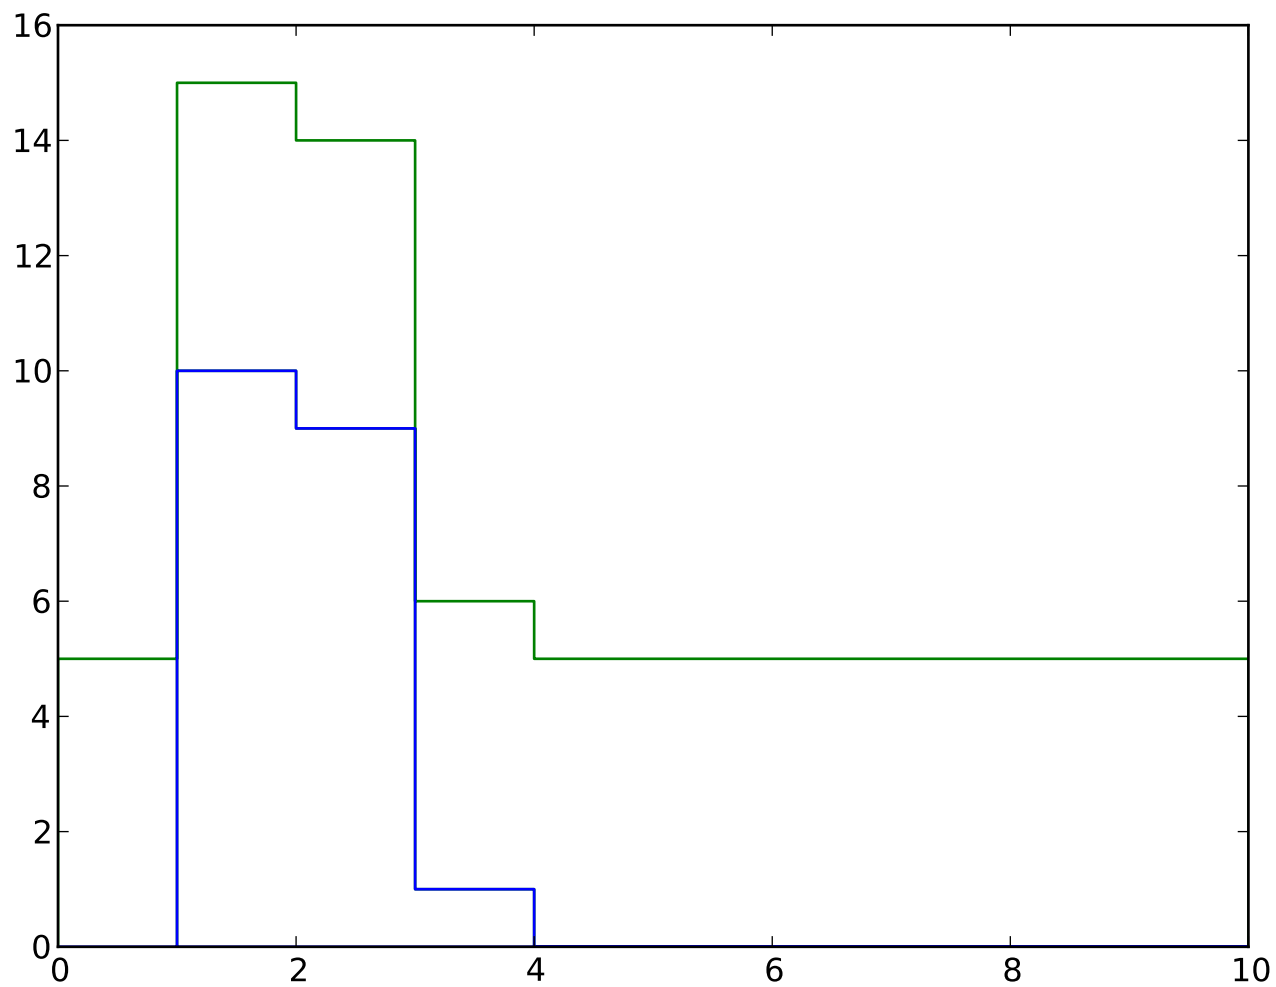

Supplement: Supplementary file 31 [file hist_stacked_step.pdf › Mac OS X/dist/avlog.app/Contents/Resources/lib/python2.7/matplotlib/tests/baseline_images/test_axes/hist_stacked_step.pdf]

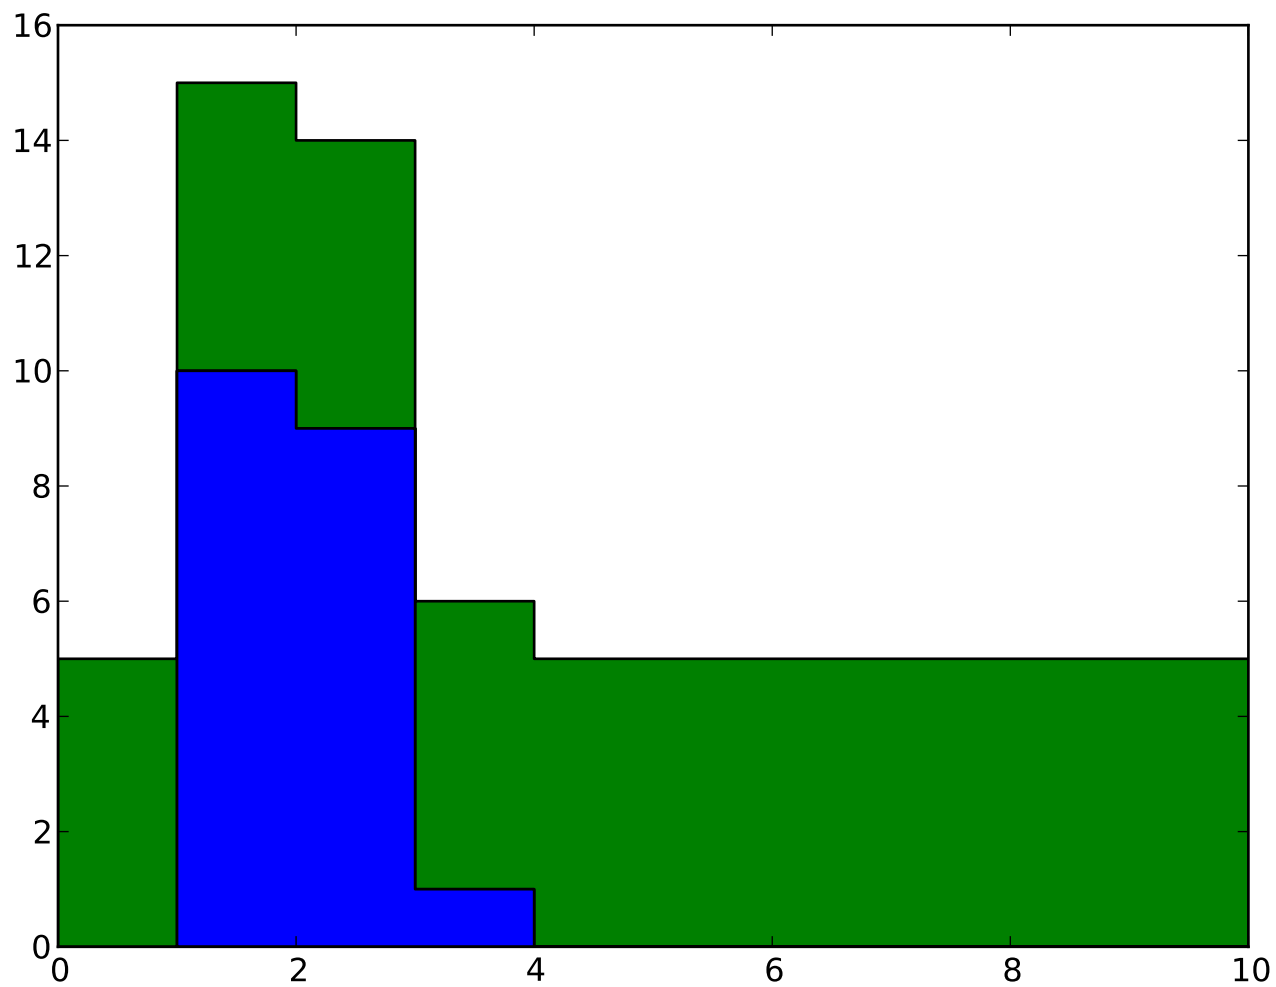

Supplement: Supplementary file 32 [file hist_stacked_stepfilled.pdf › Mac OS X/dist/avlog.app/Contents/Resources/lib/python2.7/matplotlib/tests/baseline_images/test_axes/hist_stacked_stepfilled.pdf]

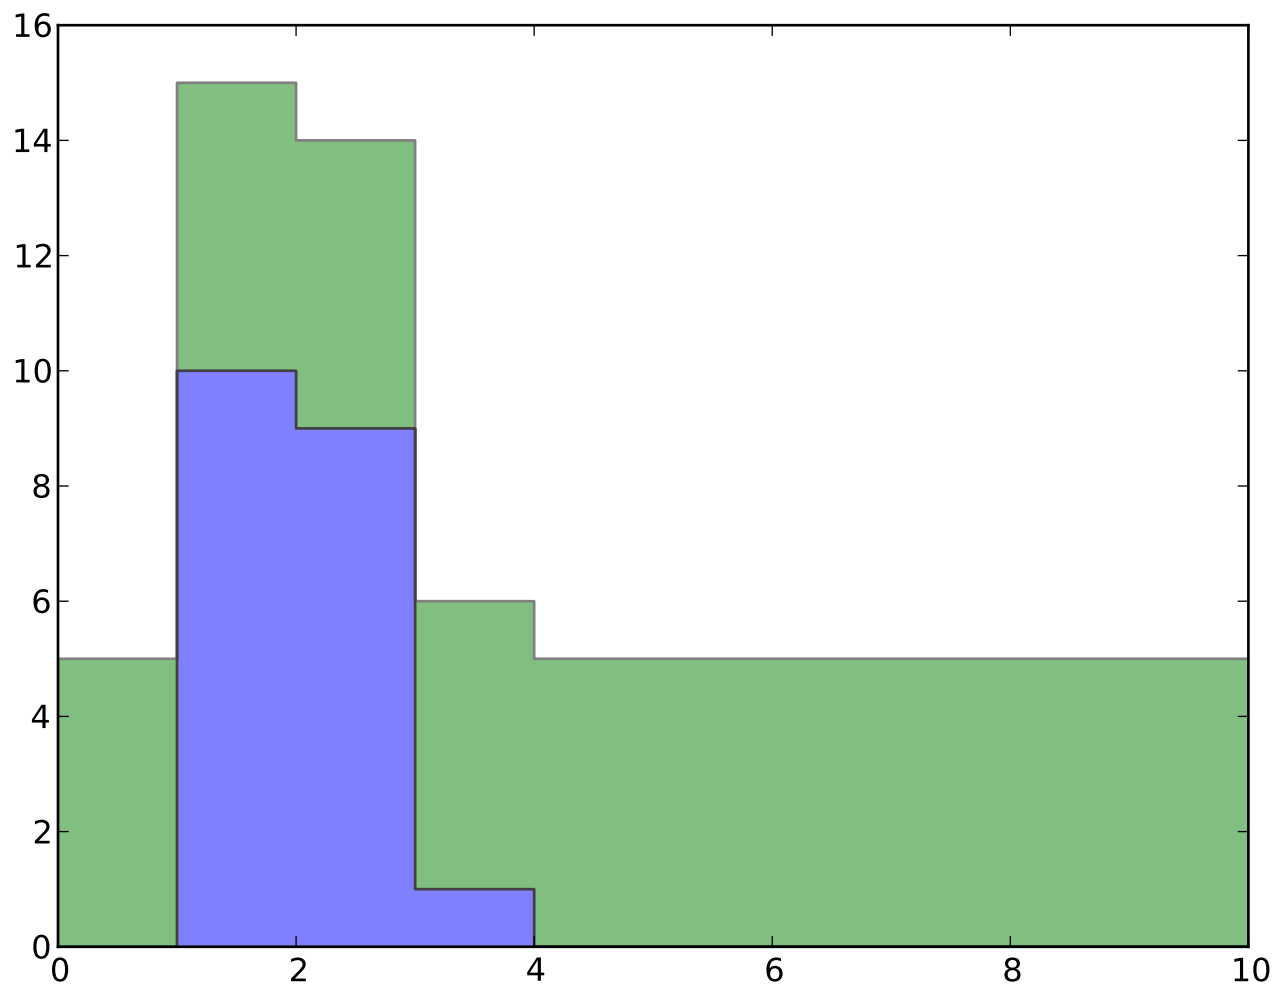

Supplement: Supplementary file 33 [file hist_stacked_stepfilled_alpha.pdf › Mac OS X/dist/avlog.app/Contents/Resources/lib/python2.7/matplotlib/tests/baseline_images/test_axes/hist_stacked_stepfilled_alpha.pdf]

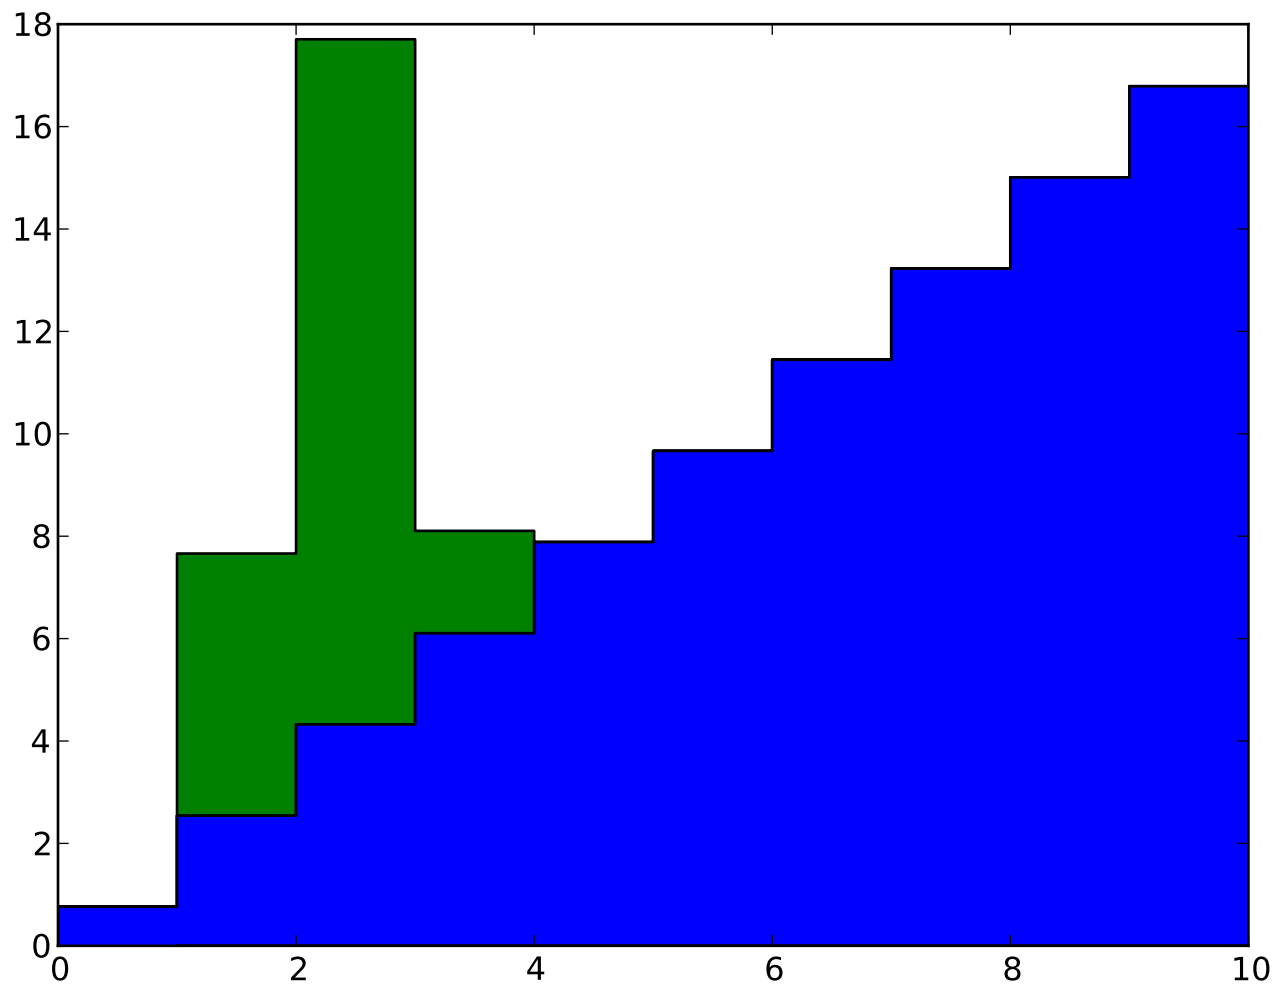

Supplement: Supplementary file 34 [file hist_stacked_weights.pdf › Mac OS X/dist/avlog.app/Contents/Resources/lib/python2.7/matplotlib/tests/baseline_images/test_axes/hist_stacked_weights.pdf]

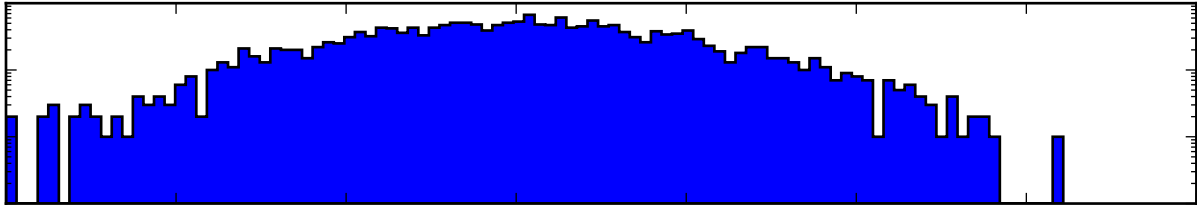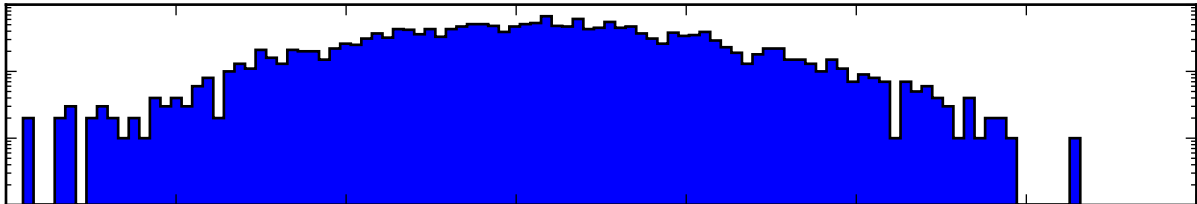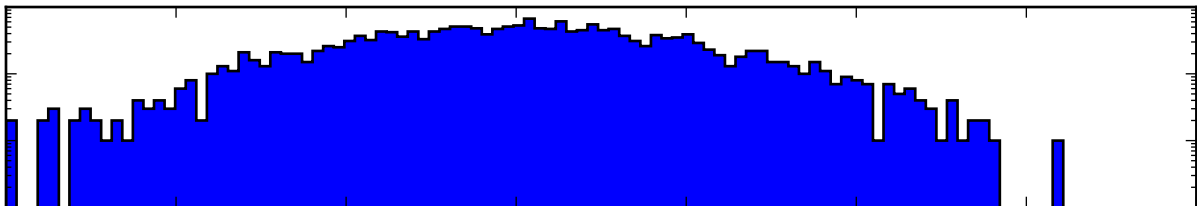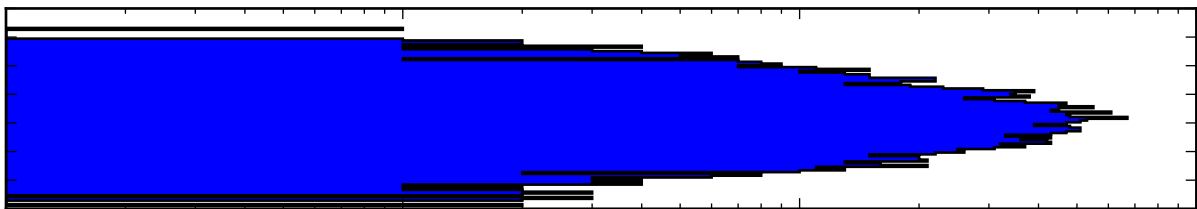

Supplement: Supplementary file 35 [file hist_steplog.pdf › Mac OS X/dist/avlog.app/Contents/Resources/lib/python2.7/matplotlib/tests/baseline_images/test_axes/hist_steplog.pdf]

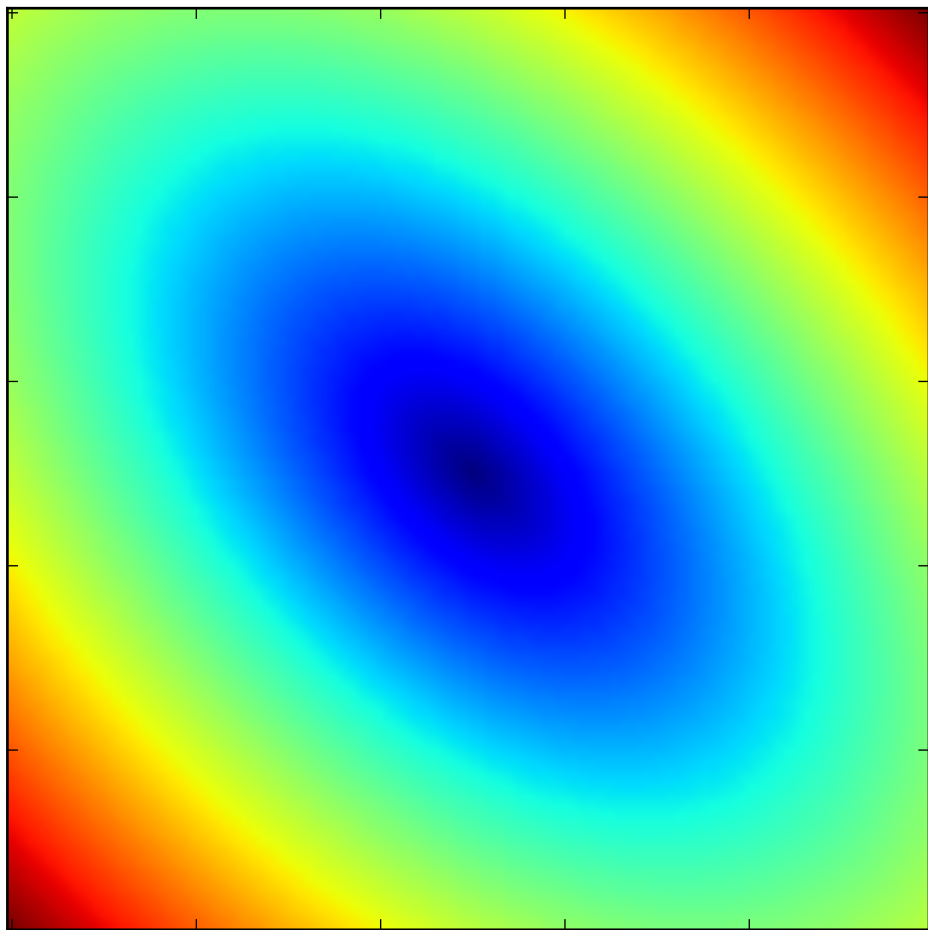

Supplement: Supplementary file 36 [file imshow.pdf › Mac OS X/dist/avlog.app/Contents/Resources/lib/python2.7/matplotlib/tests/baseline_images/test_axes/imshow.pdf]

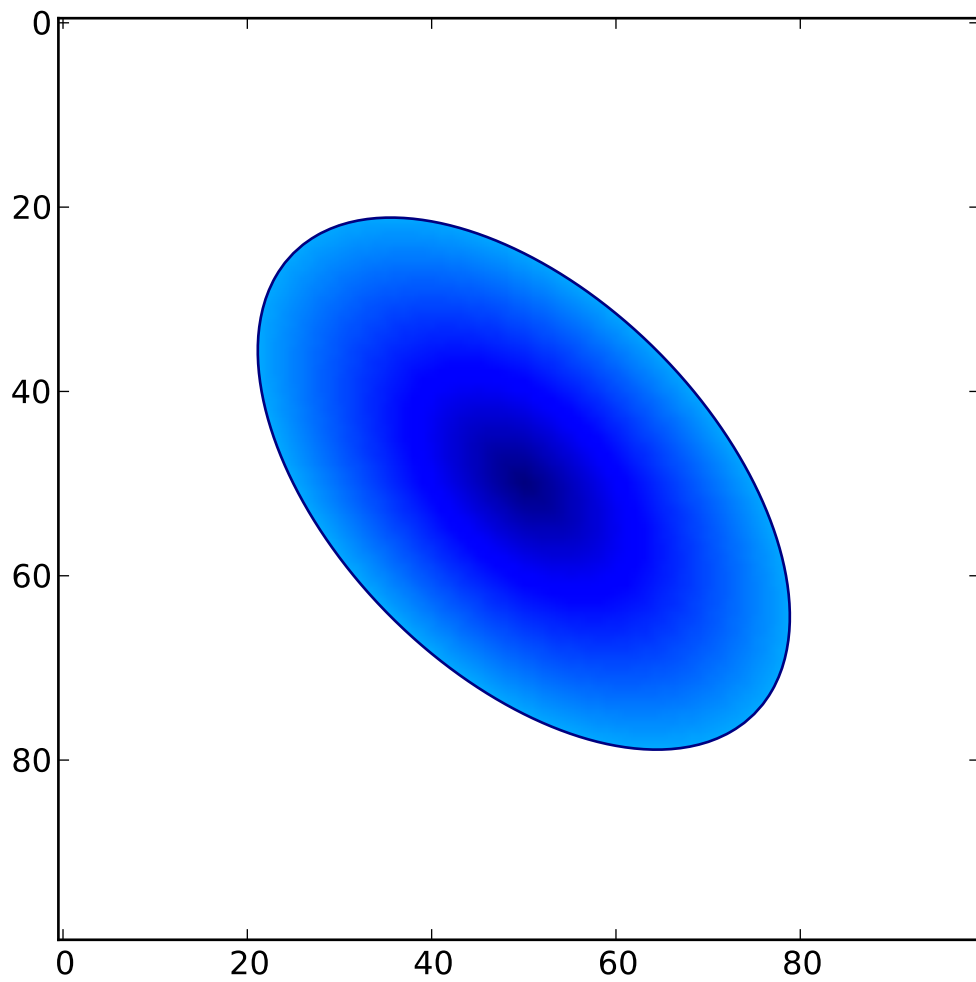

Supplement: Supplementary file 37 [file imshow_clip.pdf › Mac OS X/dist/avlog.app/Contents/Resources/lib/python2.7/matplotlib/tests/baseline_images/test_axes/imshow_clip.pdf]

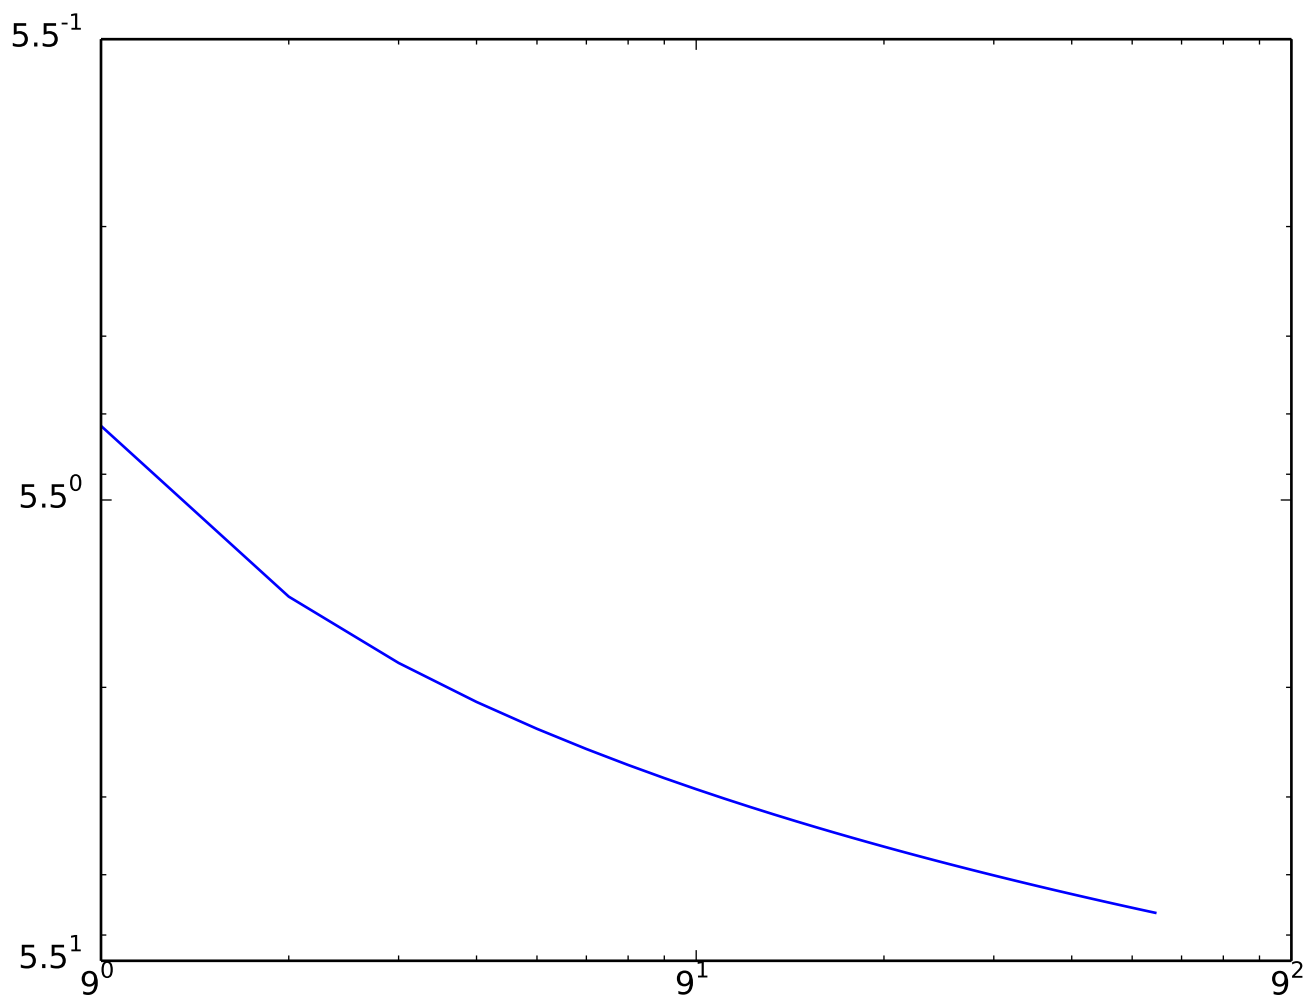

Supplement: Supplementary file 38 [file log_scales.pdf › Mac OS X/dist/avlog.app/Contents/Resources/lib/python2.7/matplotlib/tests/baseline_images/test_axes/log_scales.pdf]

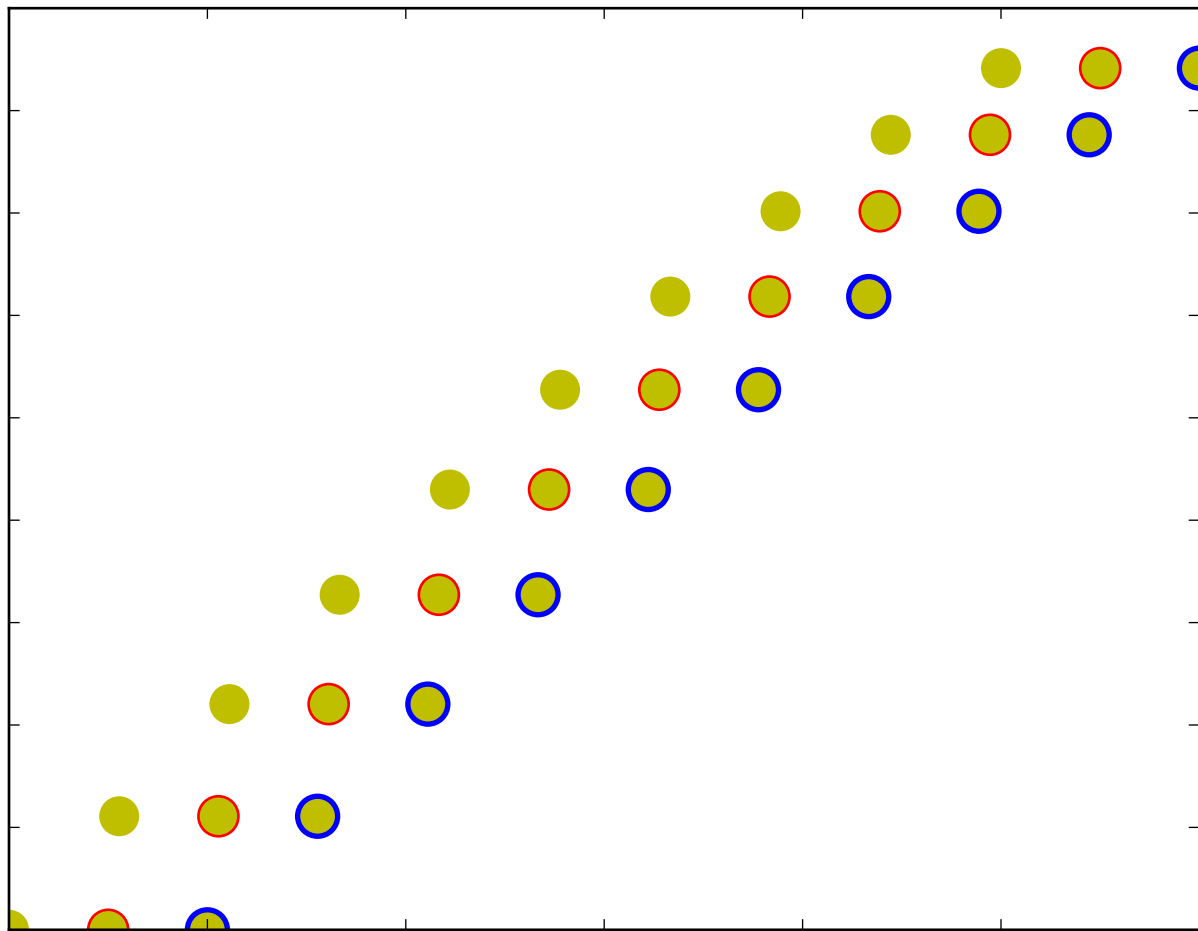

Supplement: Supplementary file 39 [file marker_edges.pdf › Mac OS X/dist/avlog.app/Contents/Resources/lib/python2.7/matplotlib/tests/baseline_images/test_axes/marker_edges.pdf]

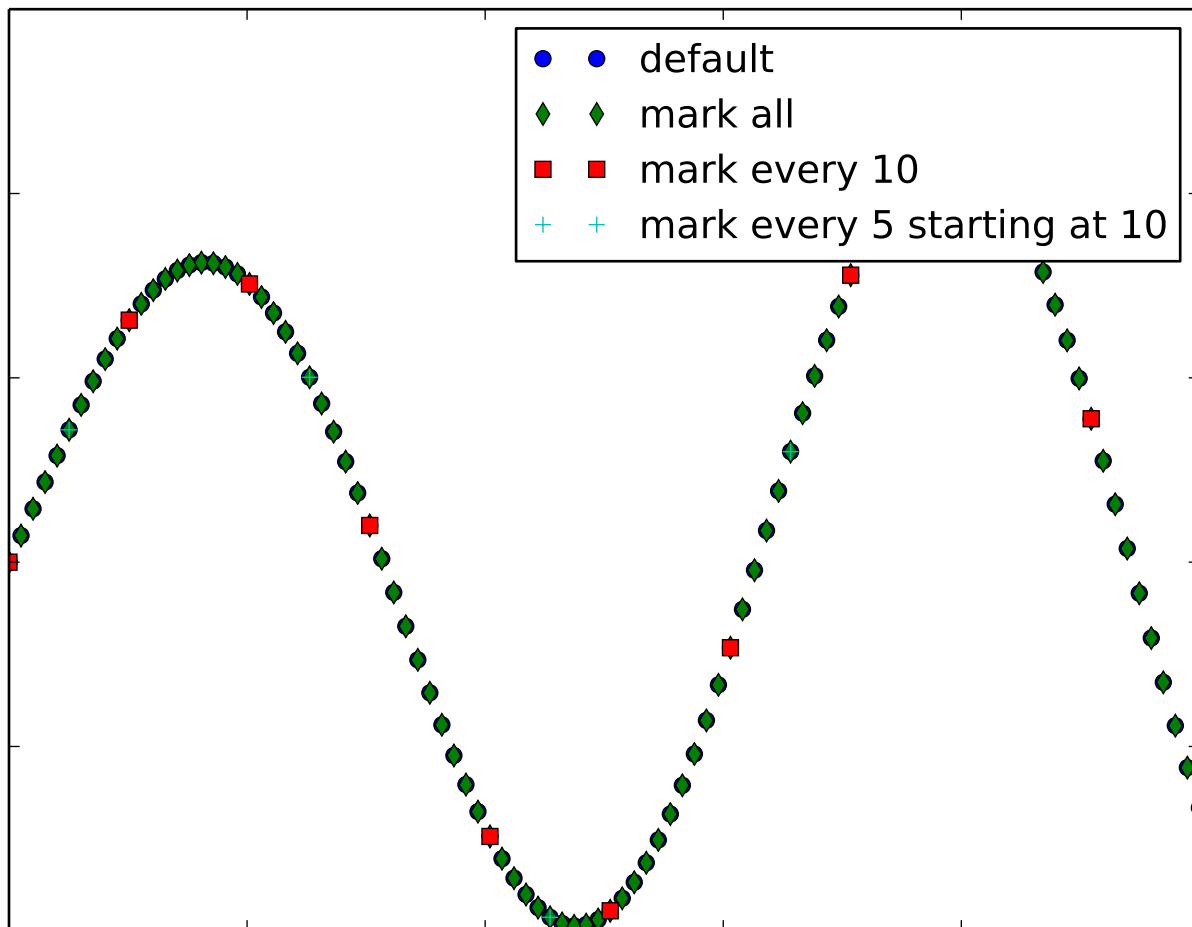

Supplement: Supplementary file 40 [file markevery.pdf › Mac OS X/dist/avlog.app/Contents/Resources/lib/python2.7/matplotlib/tests/baseline_images/test_axes/markevery.pdf]

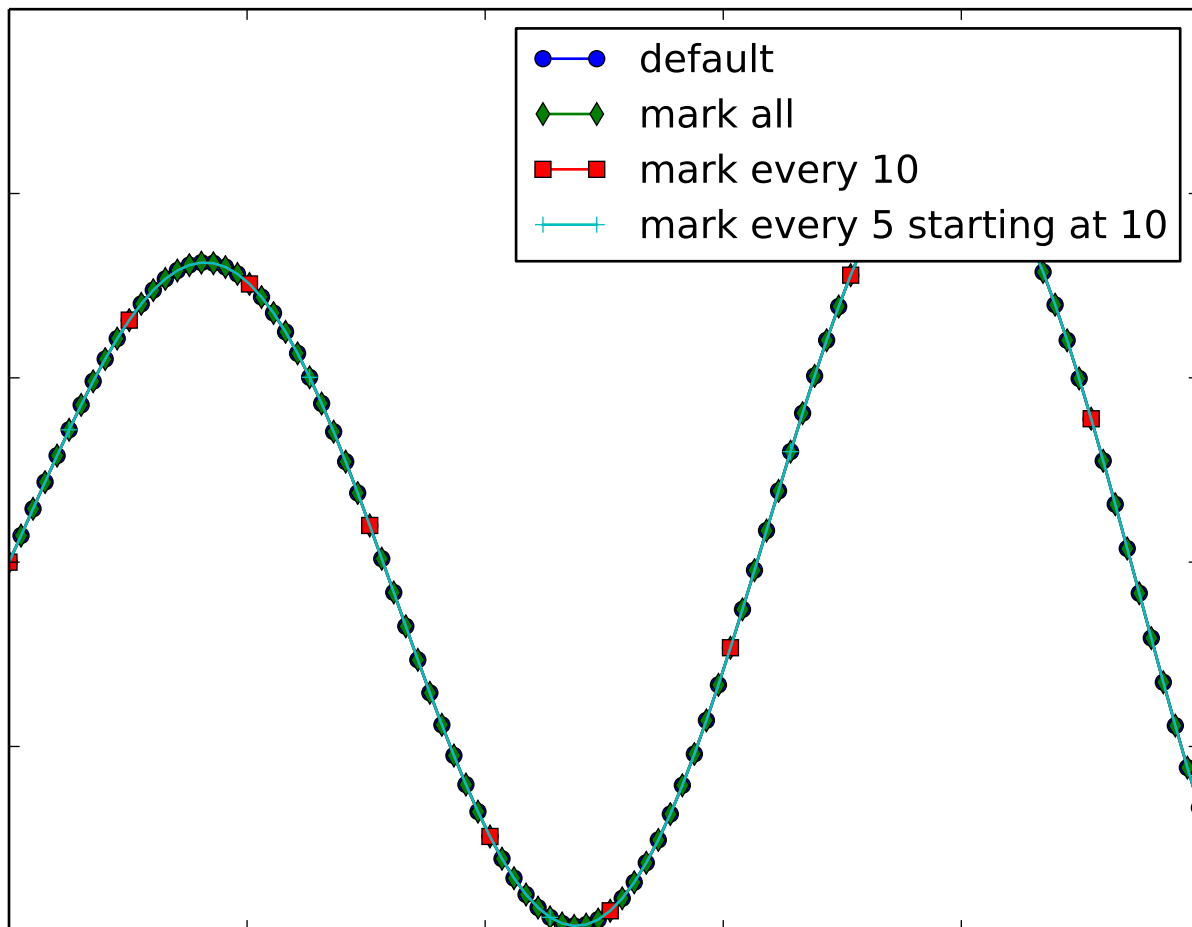

Supplement: Supplementary file 41 [file markevery_line.pdf › Mac OS X/dist/avlog.app/Contents/Resources/lib/python2.7/matplotlib/tests/baseline_images/test_axes/markevery_line.pdf]

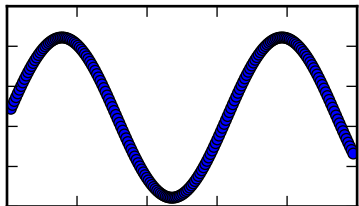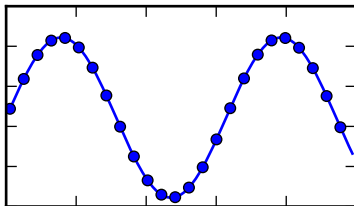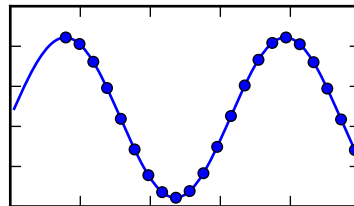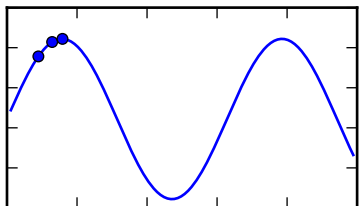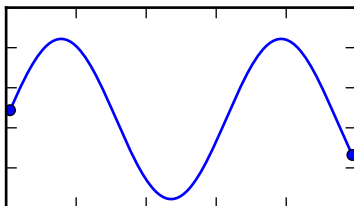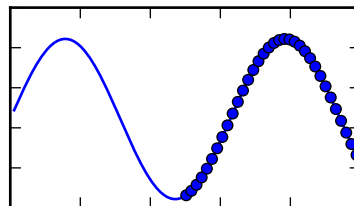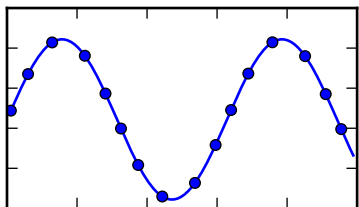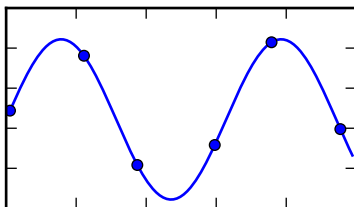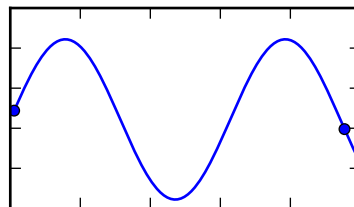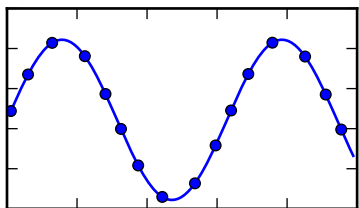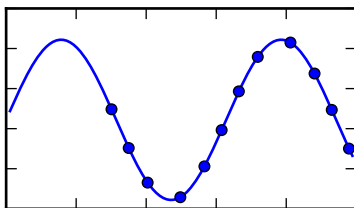

Supplement: Supplementary file 42 [file markevery_linear_scales.pdf › Mac OS X/dist/avlog.app/Contents/Resources/lib/python2.7/matplotlib/tests/baseline_images/test_axes/markevery_linear_scales.pdf]

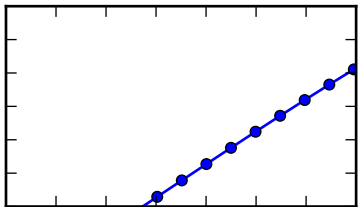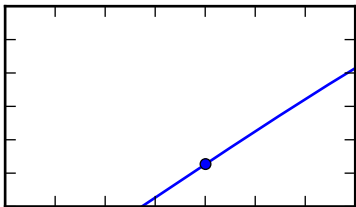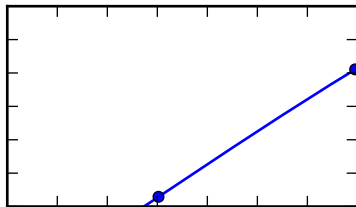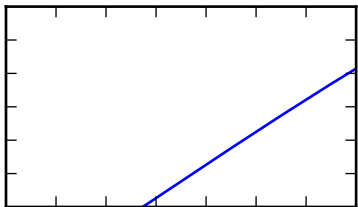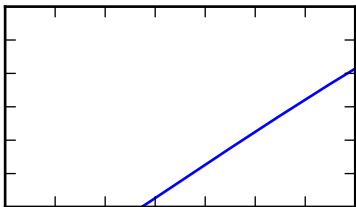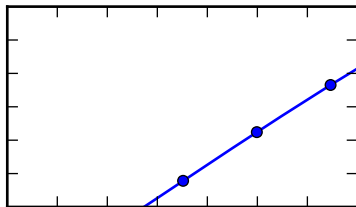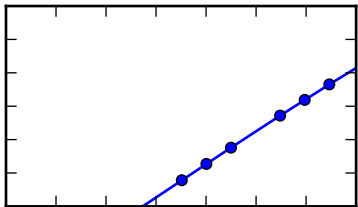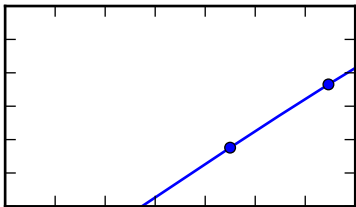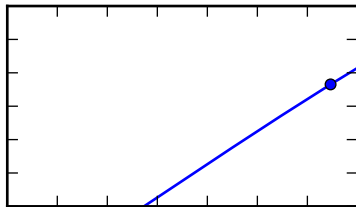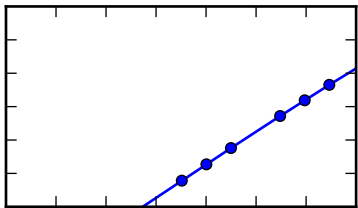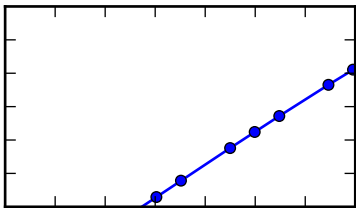

Supplement: Supplementary file 43 [file markevery_linear_scales_zoomed.pdf › Mac OS X/dist/avlog.app/Contents/Resources/lib/python2.7/matplotlib/tests/baseline_images/test_axes/markevery_linear_scales_zoomed.pdf]

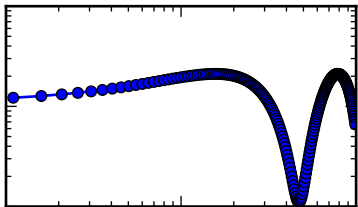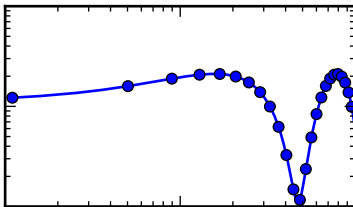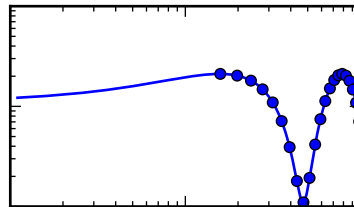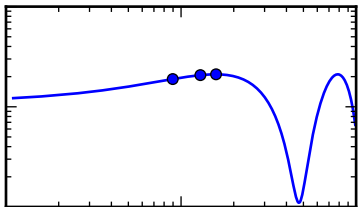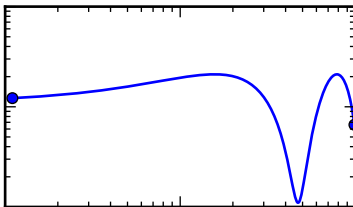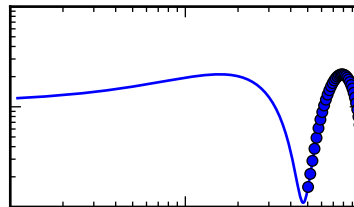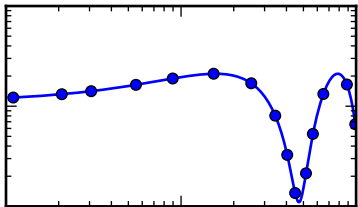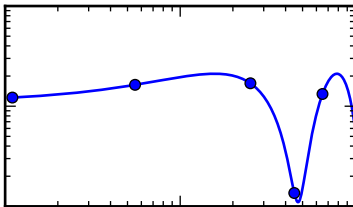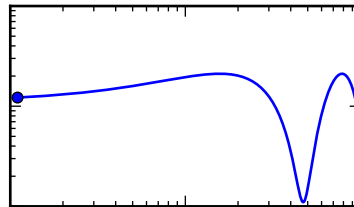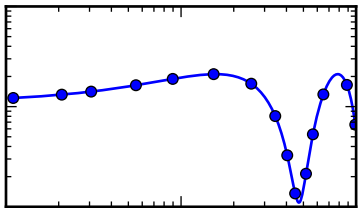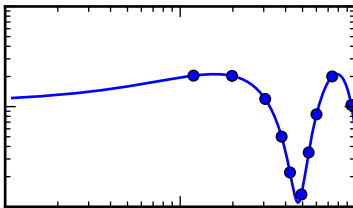

Supplement: Supplementary file 44 [file markevery_log_scales.pdf › Mac OS X/dist/avlog.app/Contents/Resources/lib/python2.7/matplotlib/tests/baseline_images/test_axes/markevery_log_scales.pdf]

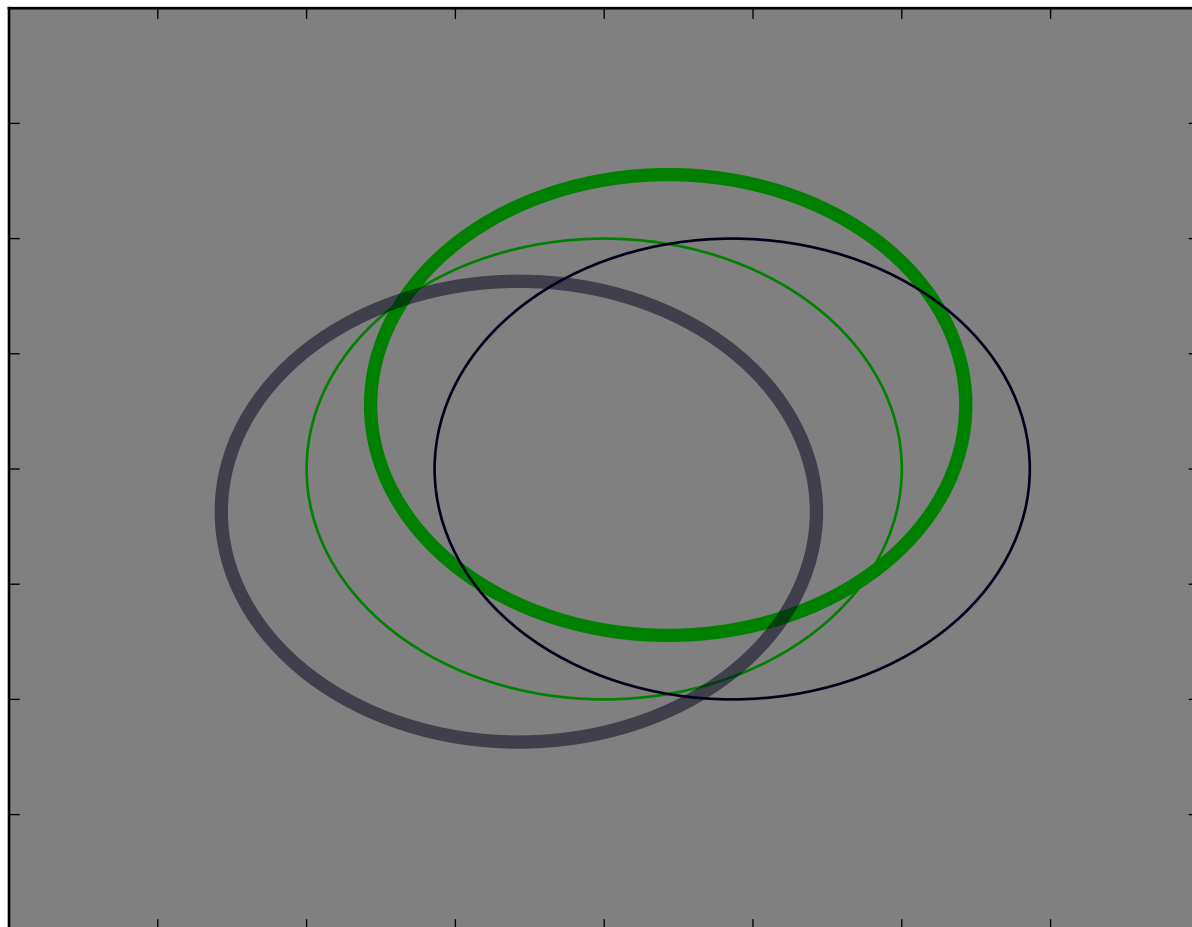

Supplement: Supplementary file 46 [file mixed_collection.pdf › Mac OS X/dist/avlog.app/Contents/Resources/lib/python2.7/matplotlib/tests/baseline_images/test_axes/mixed_collection.pdf]

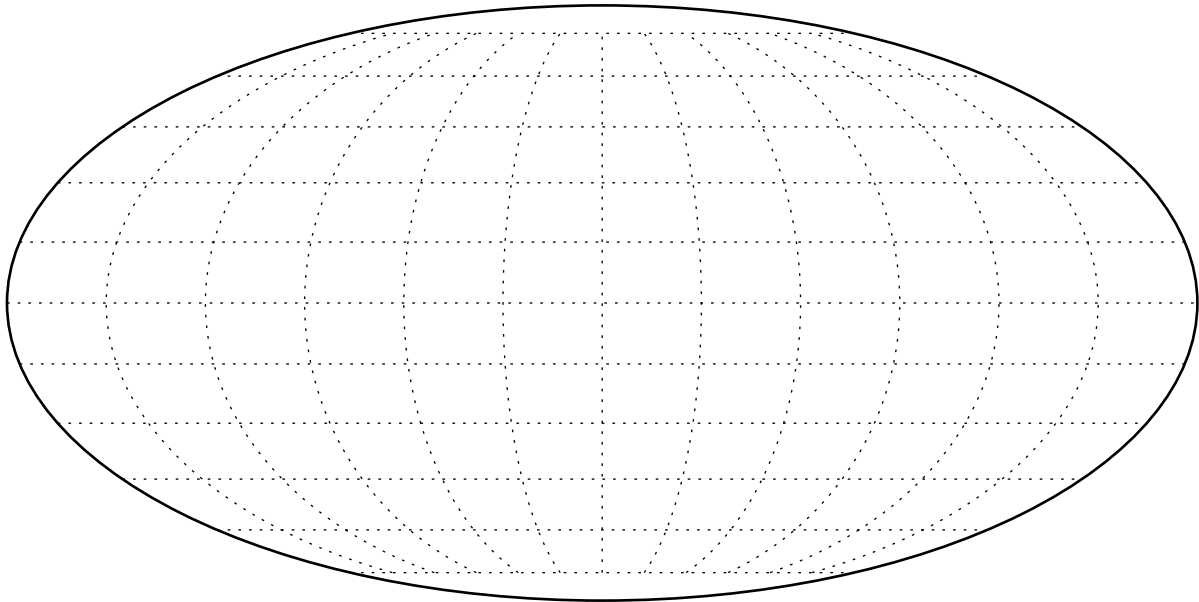

Supplement: Supplementary file 47 [file mollweide_grid.pdf › Mac OS X/dist/avlog.app/Contents/Resources/lib/python2.7/matplotlib/tests/baseline_images/test_axes/mollweide_grid.pdf]

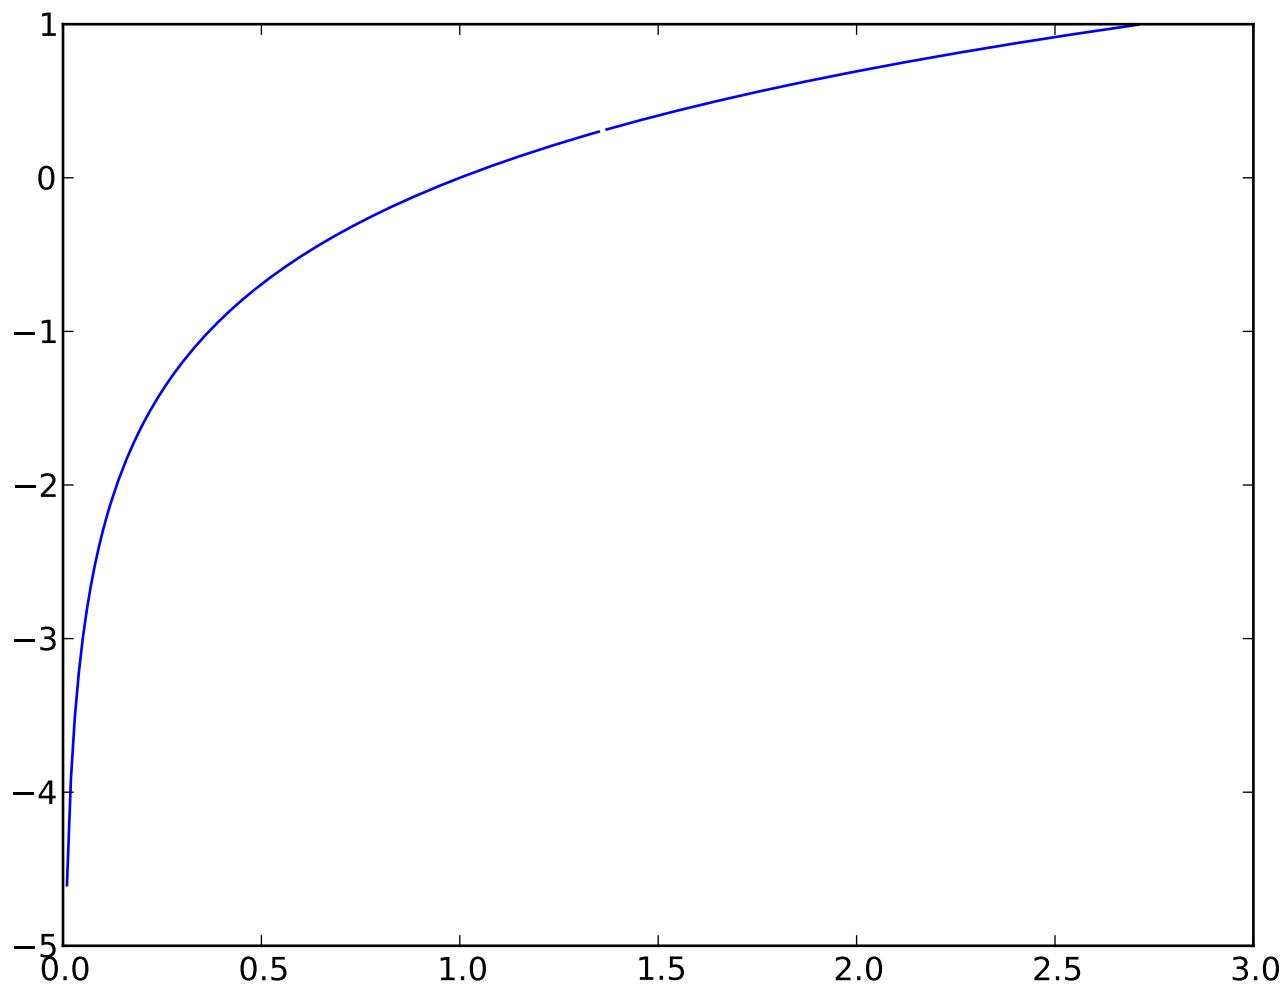

Supplement: Supplementary file 48 [file nonfinite_limits.pdf › Mac OS X/dist/avlog.app/Contents/Resources/lib/python2.7/matplotlib/tests/baseline_images/test_axes/nonfinite_limits.pdf]

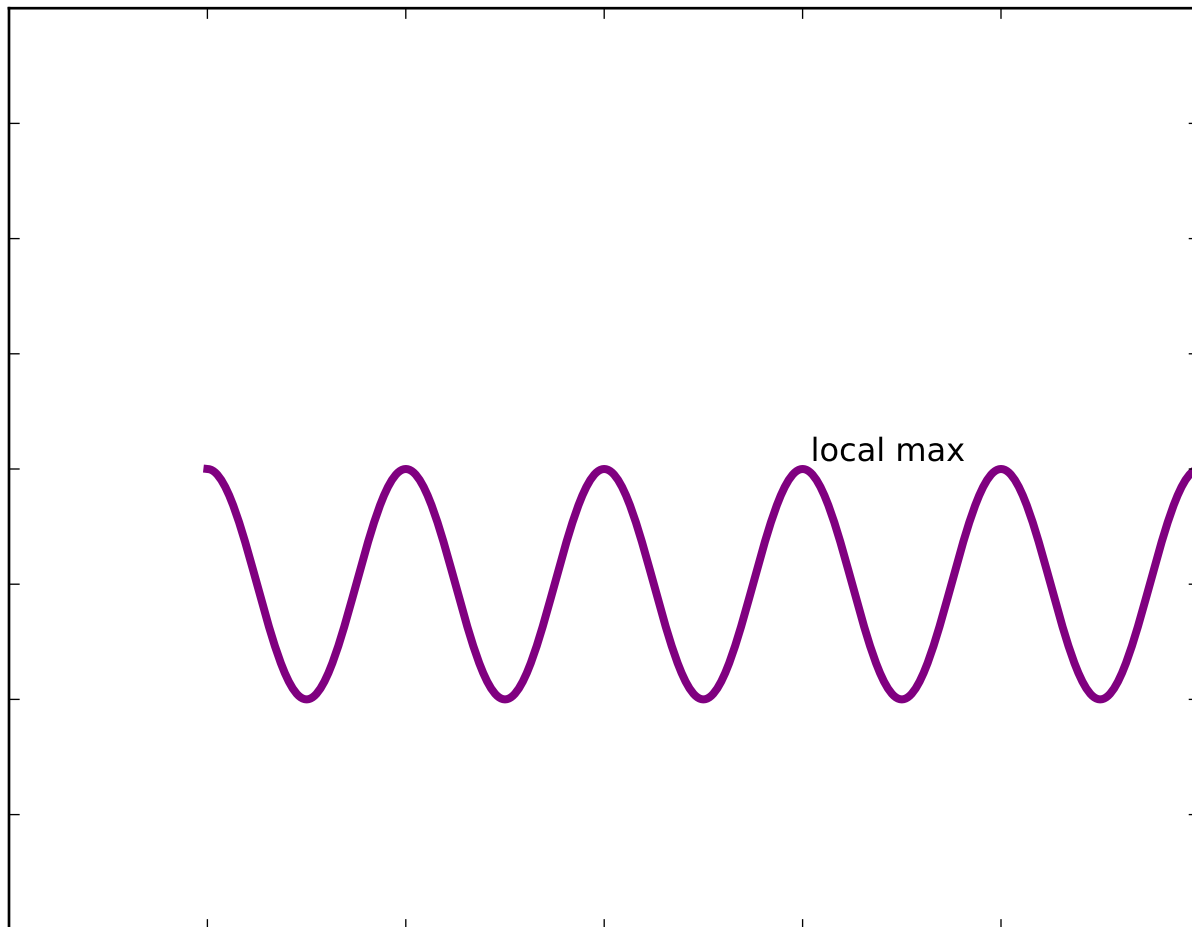

Supplement: Supplementary file 49 [file offset_points.pdf › Mac OS X/dist/avlog.app/Contents/Resources/lib/python2.7/matplotlib/tests/baseline_images/test_axes/offset_points.pdf]

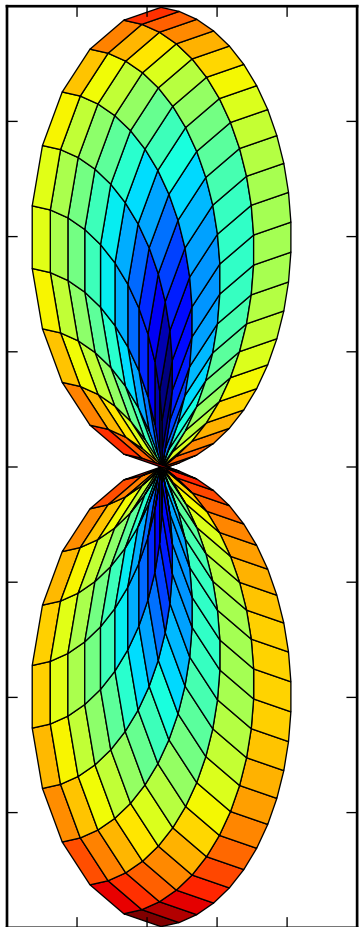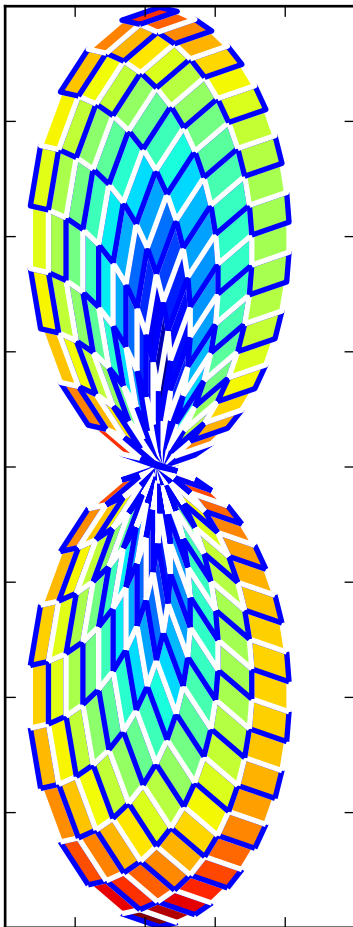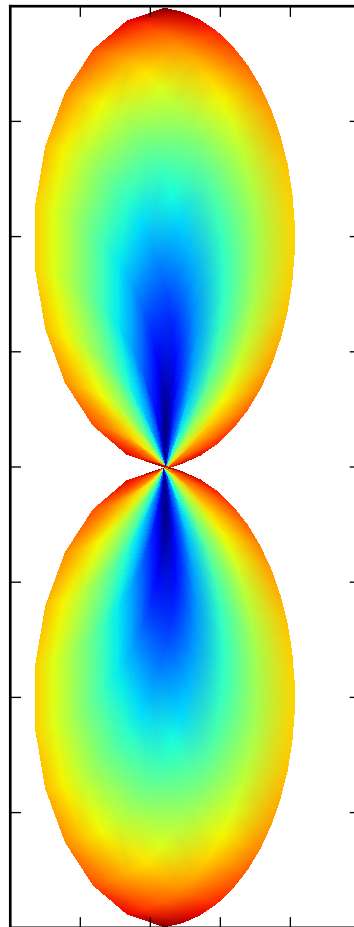

Supplement: Supplementary file 50 [file pcolormesh.pdf › Mac OS X/dist/avlog.app/Contents/Resources/lib/python2.7/matplotlib/tests/baseline_images/test_axes/pcolormesh.pdf]

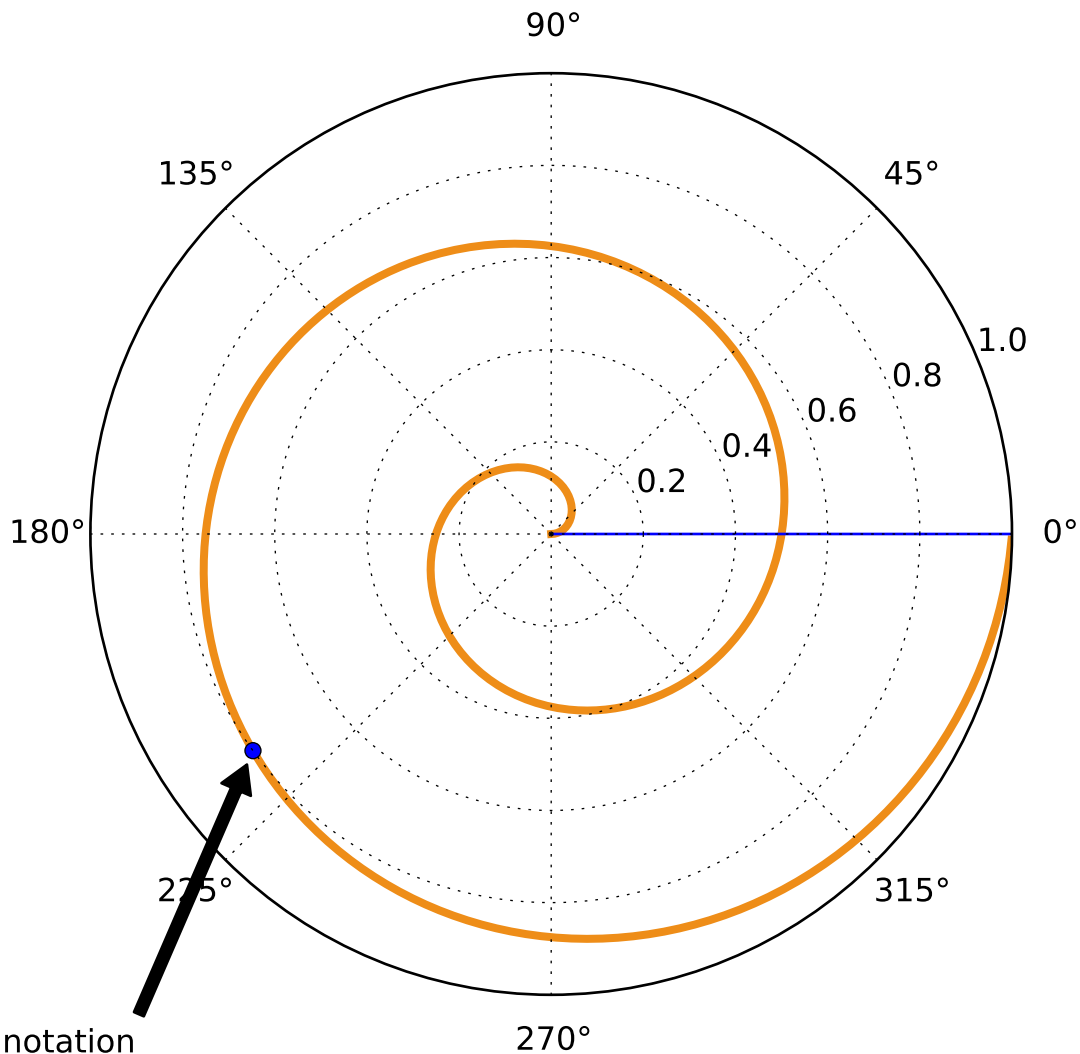

a polar annotation

Supplement: Supplementary file 51 [file polar_axes.pdf › Mac OS X/dist/avlog.app/Contents/Resources/lib/python2.7/matplotlib/tests/baseline_images/test_axes/polar_axes.pdf]

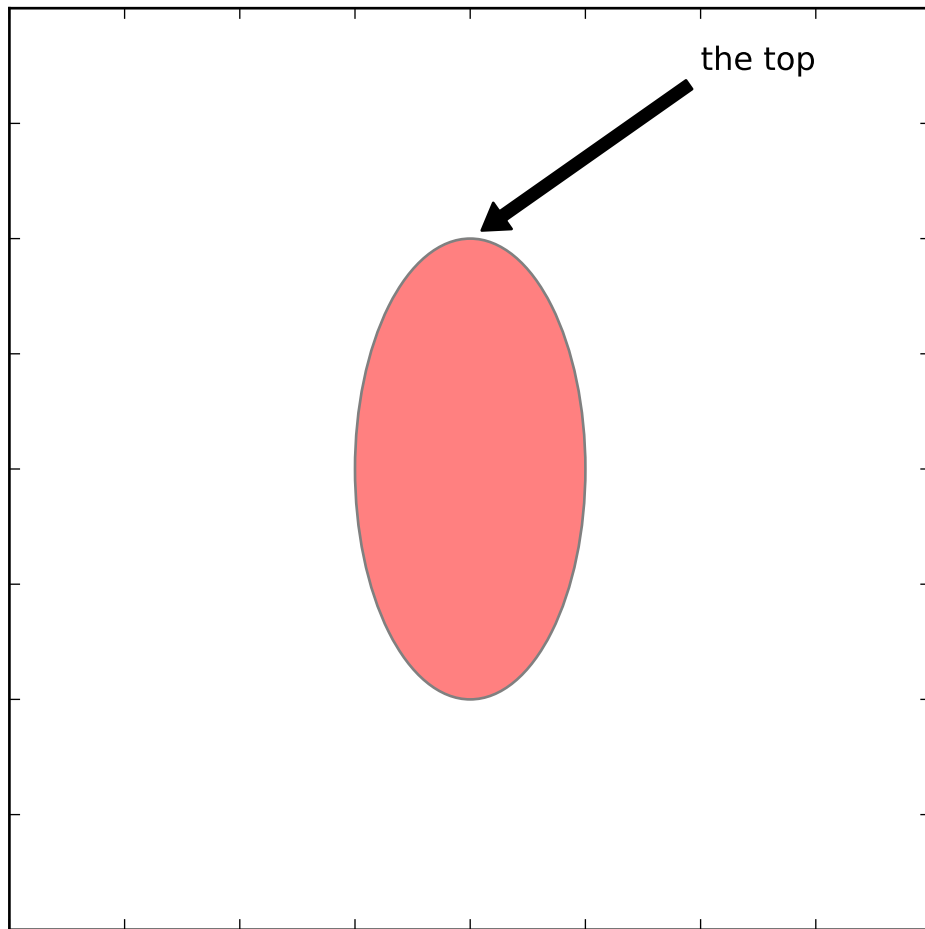

Supplement: Supplementary file 52 [file polar_coords.pdf › Mac OS X/dist/avlog.app/Contents/Resources/lib/python2.7/matplotlib/tests/baseline_images/test_axes/polar_coords.pdf]

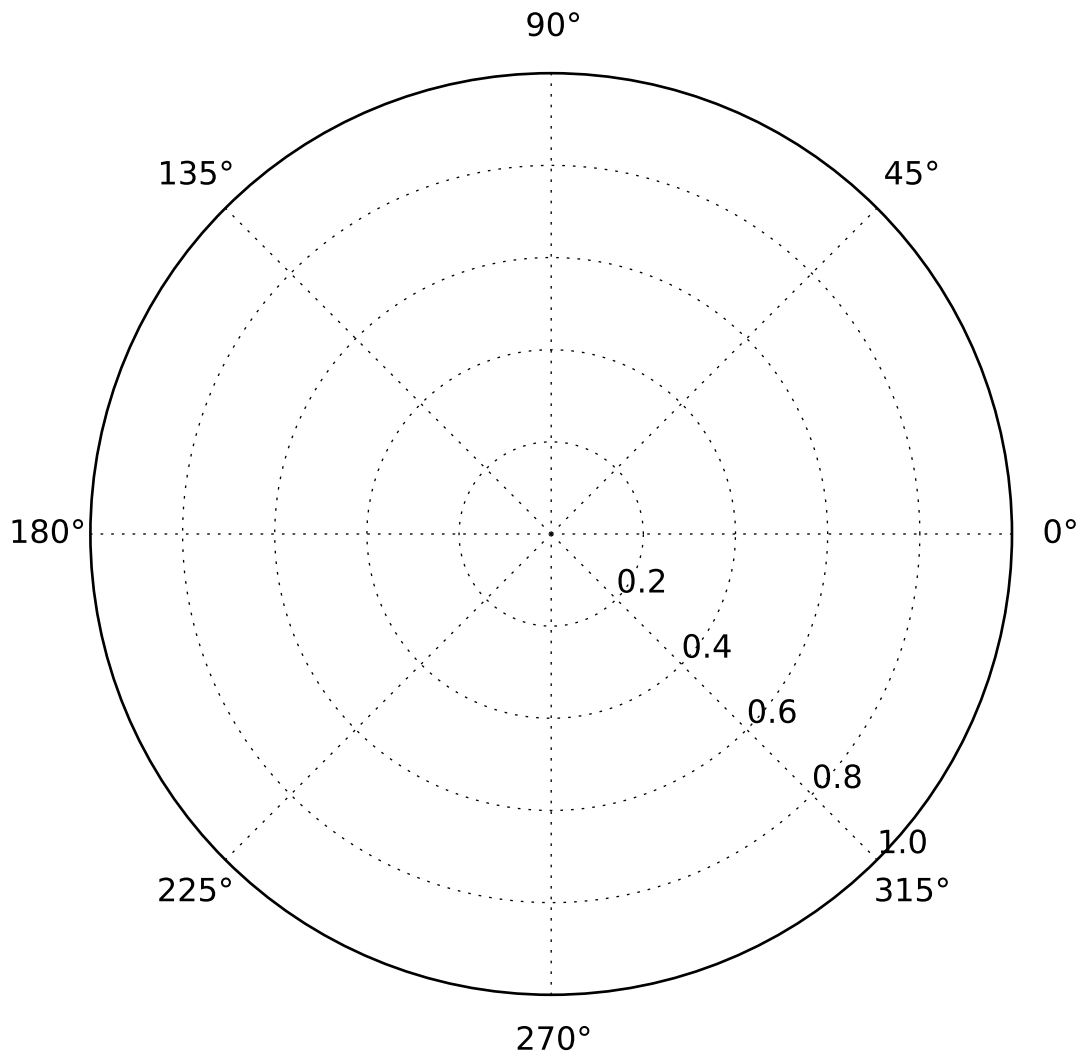

Supplement: Supplementary file 53 [file polar_rlabel_position.pdf › Mac OS X/dist/avlog.app/Contents/Resources/lib/python2.7/matplotlib/tests/baseline_images/test_axes/polar_rlabel_position.pdf]

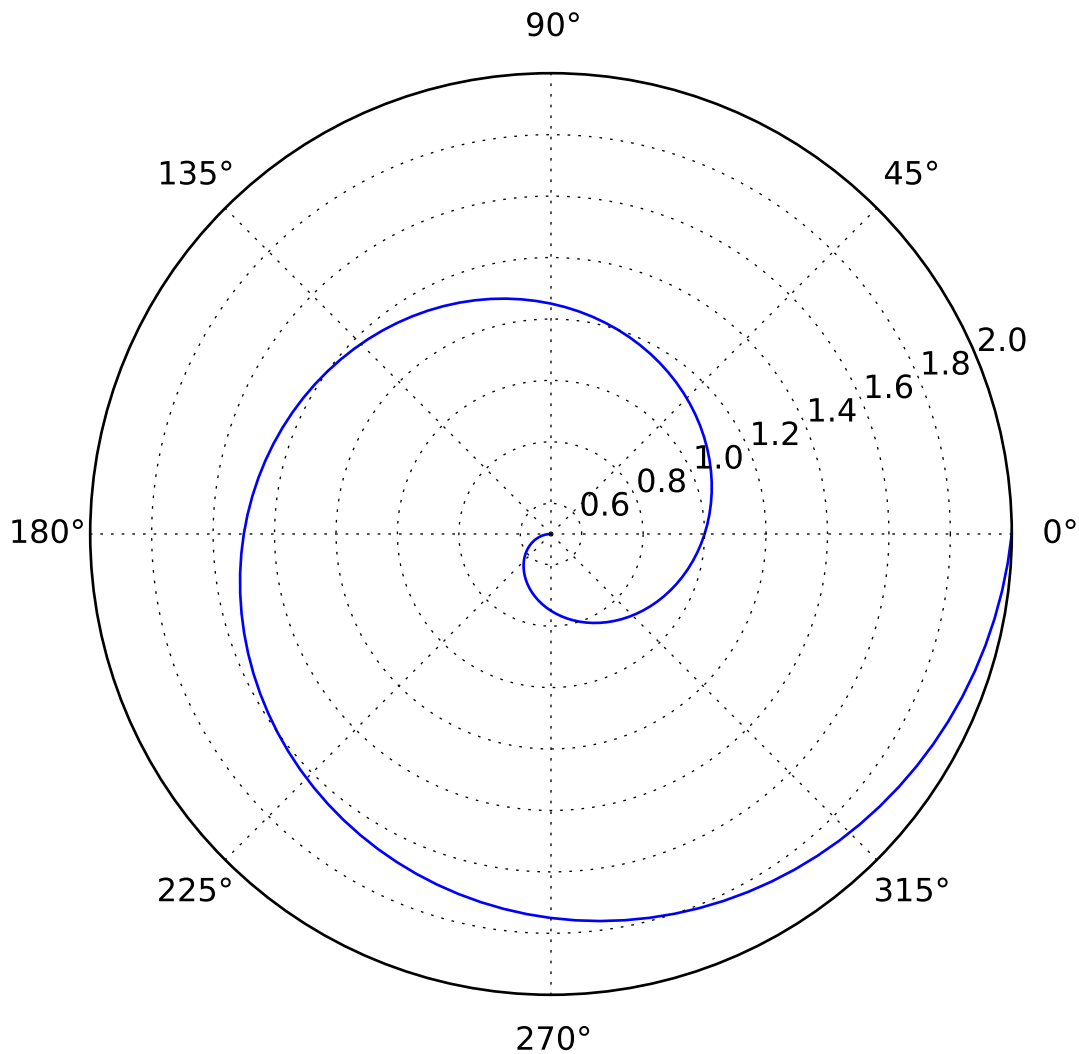

Supplement: Supplementary file 54 [file polar_rmin.pdf › Mac OS X/dist/avlog.app/Contents/Resources/lib/python2.7/matplotlib/tests/baseline_images/test_axes/polar_rmin.pdf]

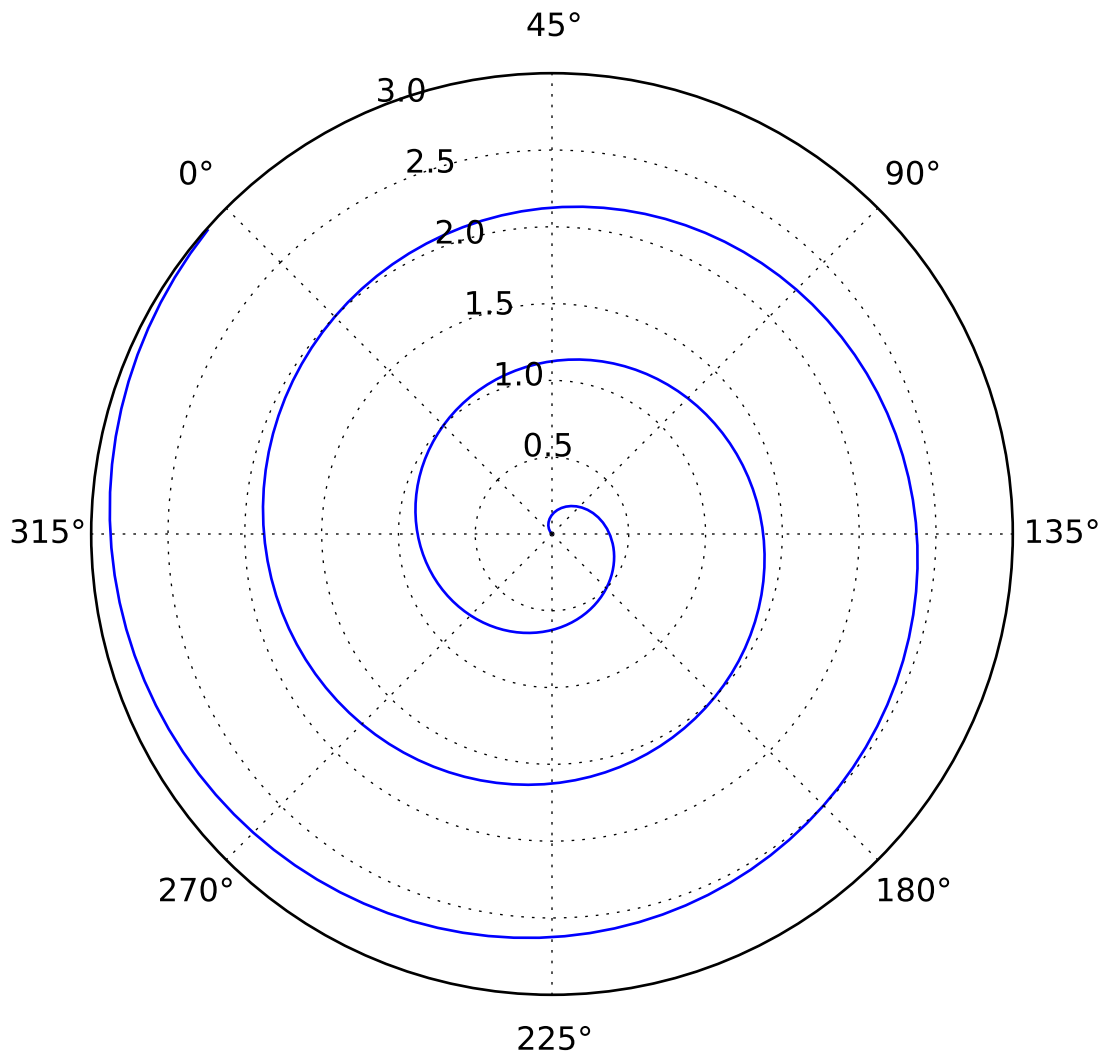

Supplement: Supplementary file 55 [file polar_theta_position.pdf › Mac OS X/dist/avlog.app/Contents/Resources/lib/python2.7/matplotlib/tests/baseline_images/test_axes/polar_theta_position.pdf]

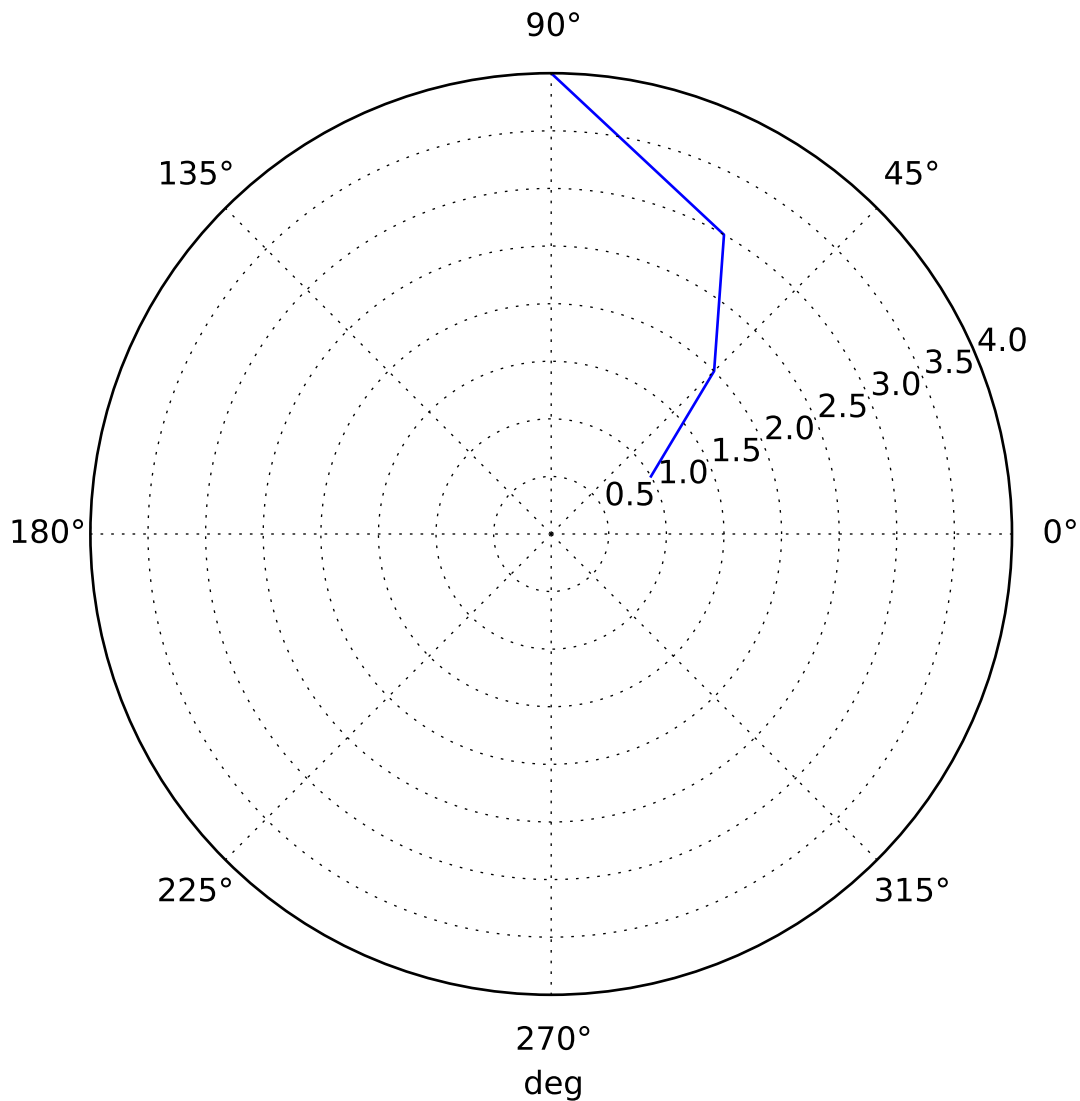

Supplement: Supplementary file 56 [file polar_units.pdf › Mac OS X/dist/avlog.app/Contents/Resources/lib/python2.7/matplotlib/tests/baseline_images/test_axes/polar_units.pdf]

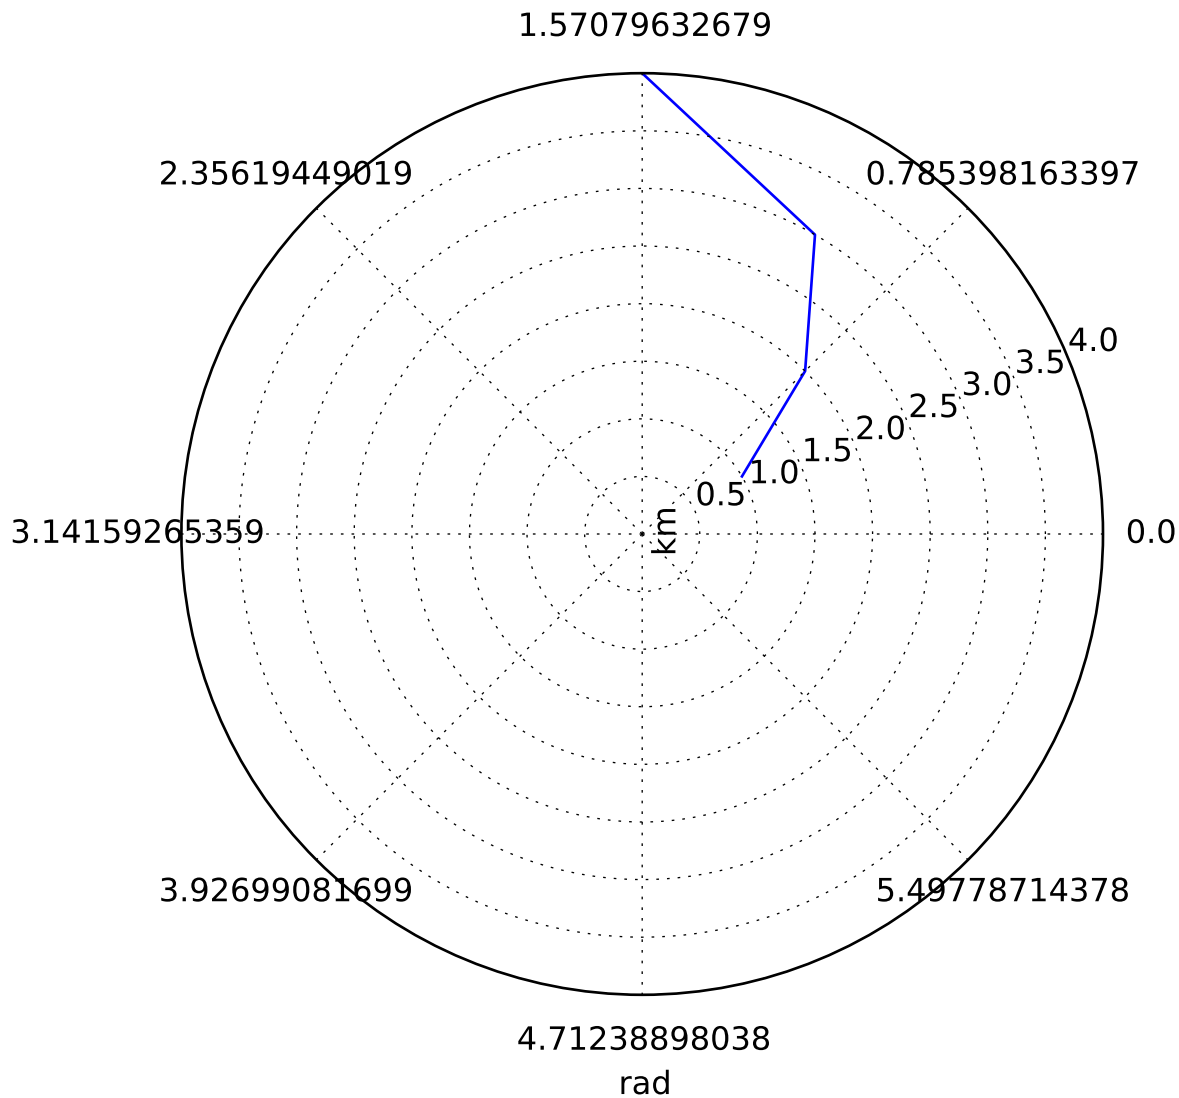

Supplement: Supplementary file 57 [file polar_units_2.pdf › Mac OS X/dist/avlog.app/Contents/Resources/lib/python2.7/matplotlib/tests/baseline_images/test_axes/polar_units_2.pdf]

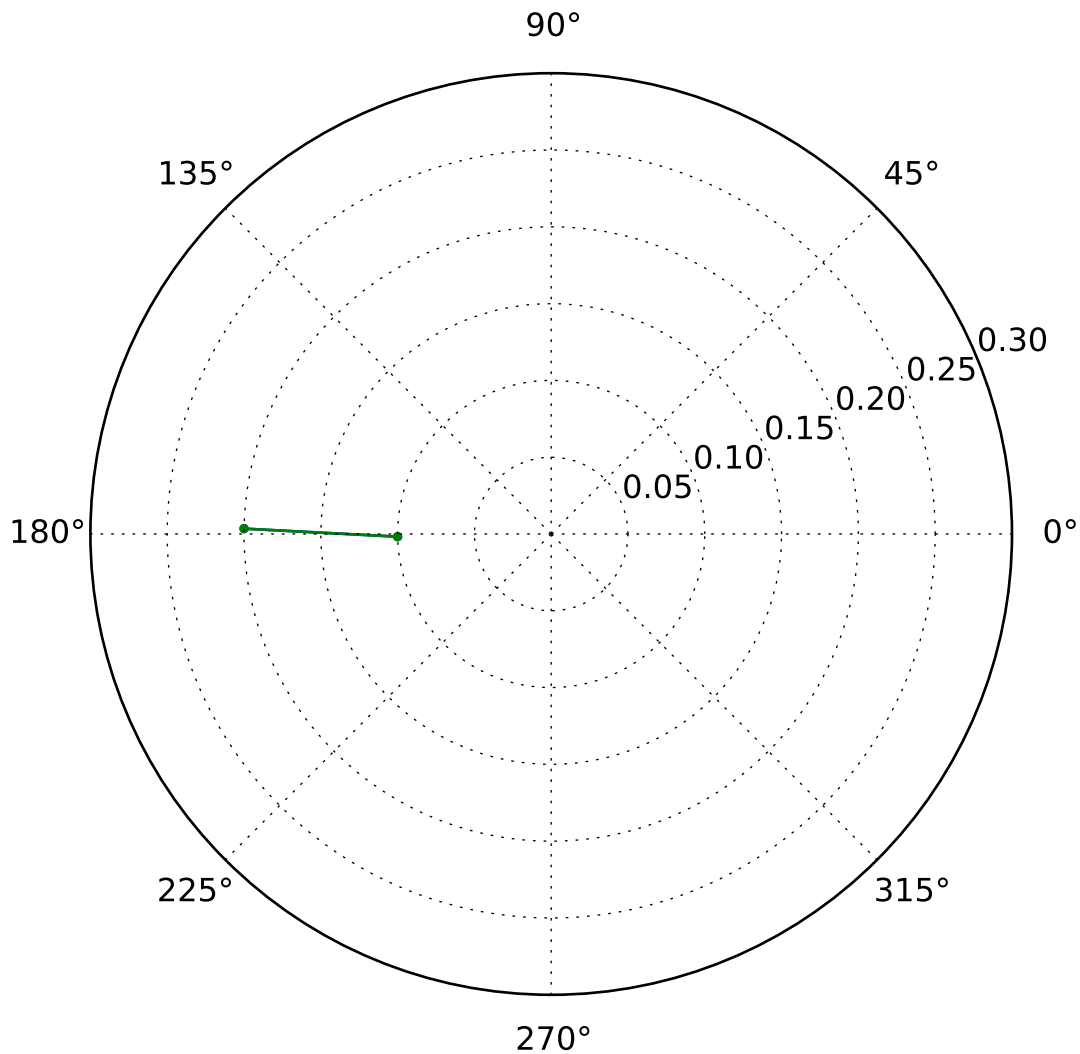

Supplement: Supplementary file 58 [file polar_wrap_180.pdf › Mac OS X/dist/avlog.app/Contents/Resources/lib/python2.7/matplotlib/tests/baseline_images/test_axes/polar_wrap_180.pdf]

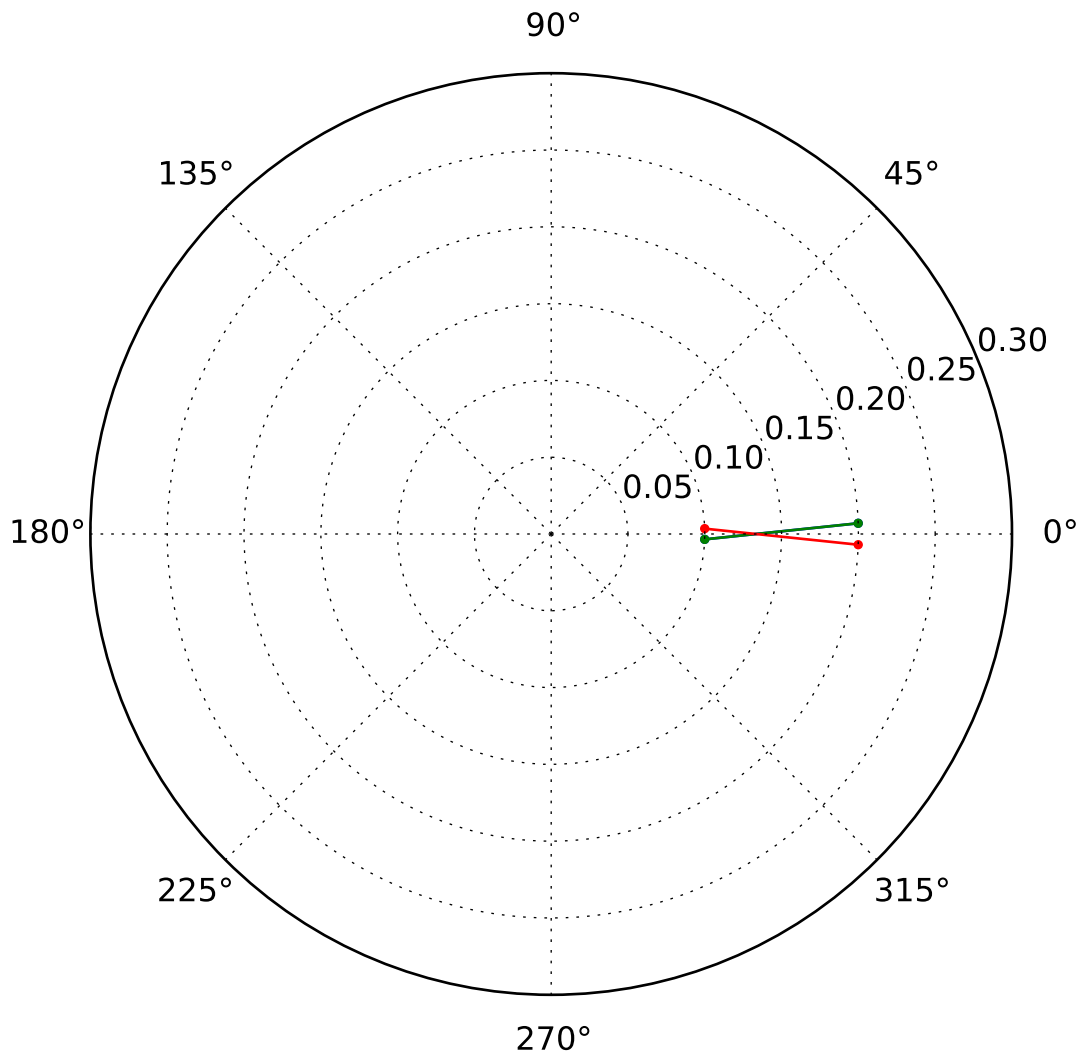

Supplement: Supplementary file 59 [file polar_wrap_360.pdf › Mac OS X/dist/avlog.app/Contents/Resources/lib/python2.7/matplotlib/tests/baseline_images/test_axes/polar_wrap_360.pdf]

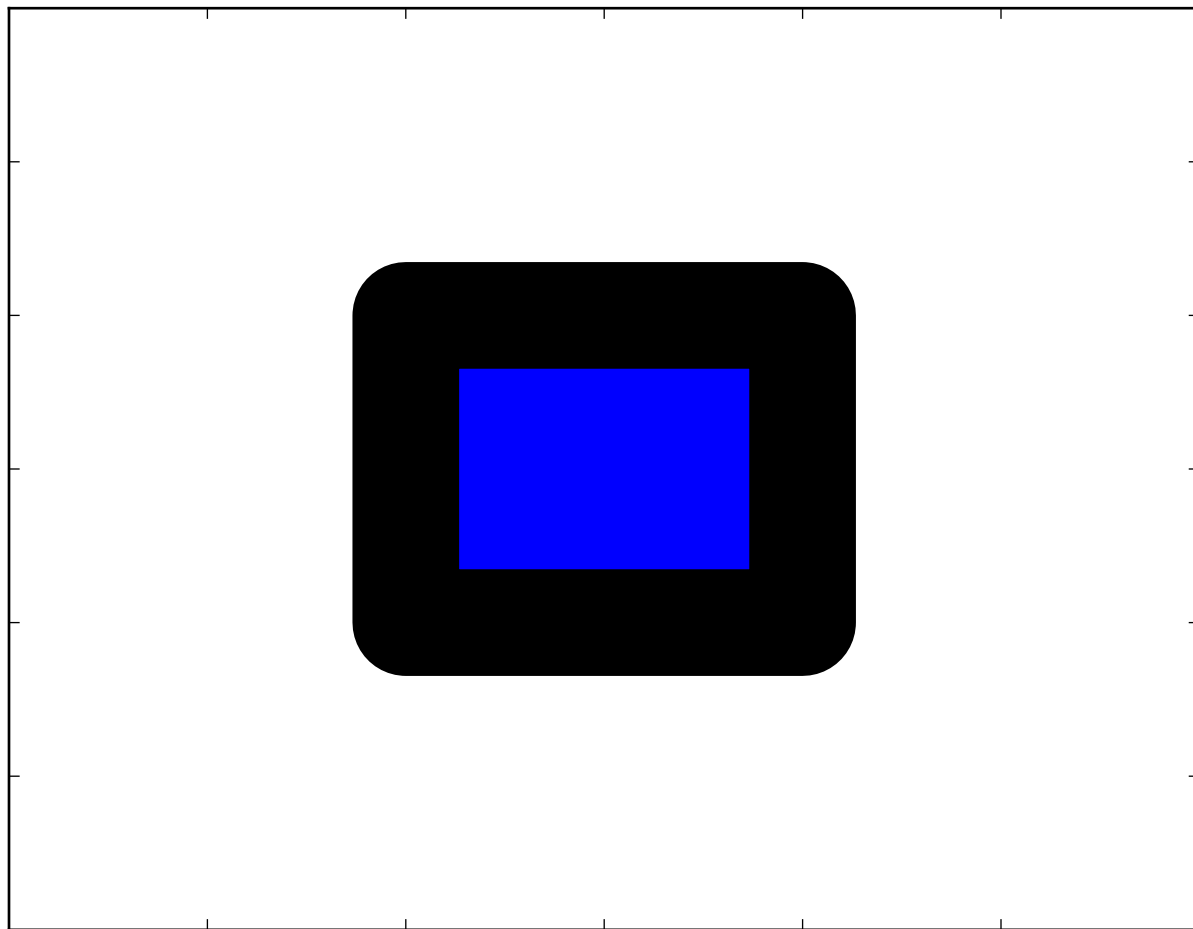

Supplement: Supplementary file 60 [file polycollection_joinstyle.pdf › Mac OS X/dist/avlog.app/Contents/Resources/lib/python2.7/matplotlib/tests/baseline_images/test_axes/polycollection_joinstyle.pdf]

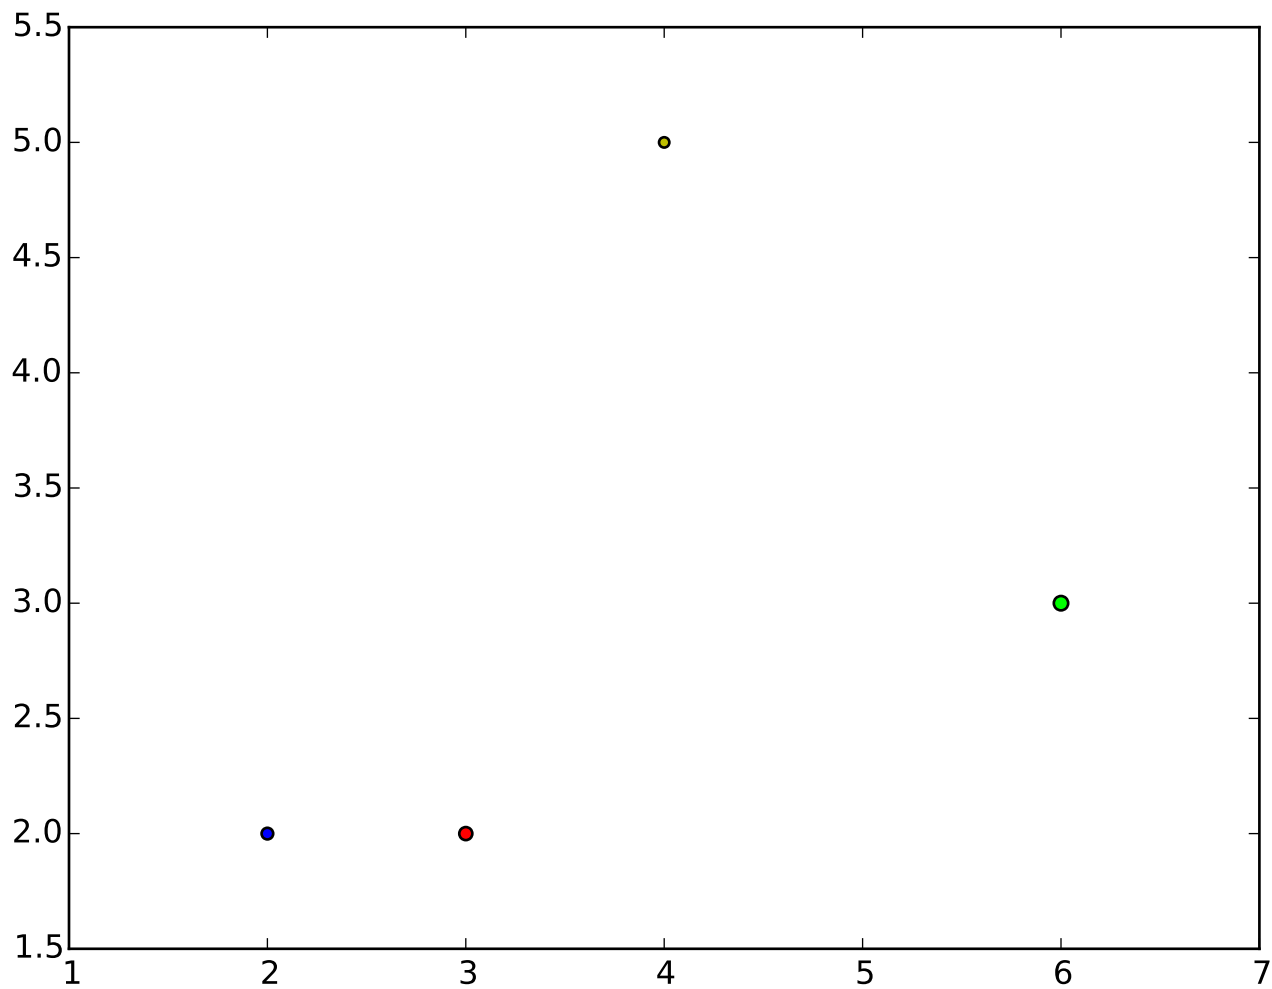

Supplement: Supplementary file 61 [file scatter.pdf › Mac OS X/dist/avlog.app/Contents/Resources/lib/python2.7/matplotlib/tests/baseline_images/test_axes/scatter.pdf]

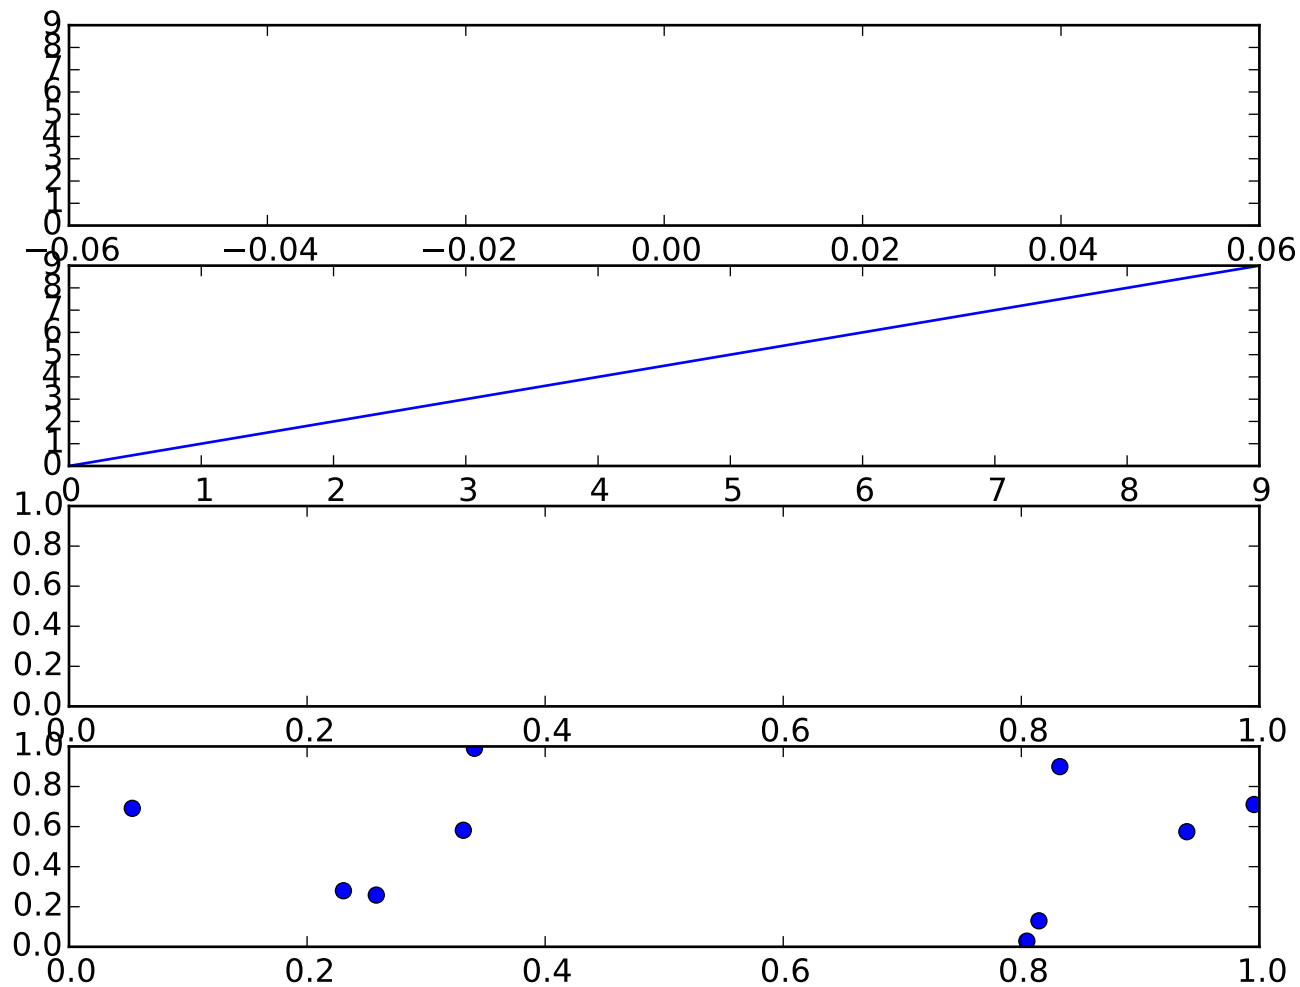

Supplement: Supplementary file 62 [file shaped_data.pdf › Mac OS X/dist/avlog.app/Contents/Resources/lib/python2.7/matplotlib/tests/baseline_images/test_axes/shaped_data.pdf]

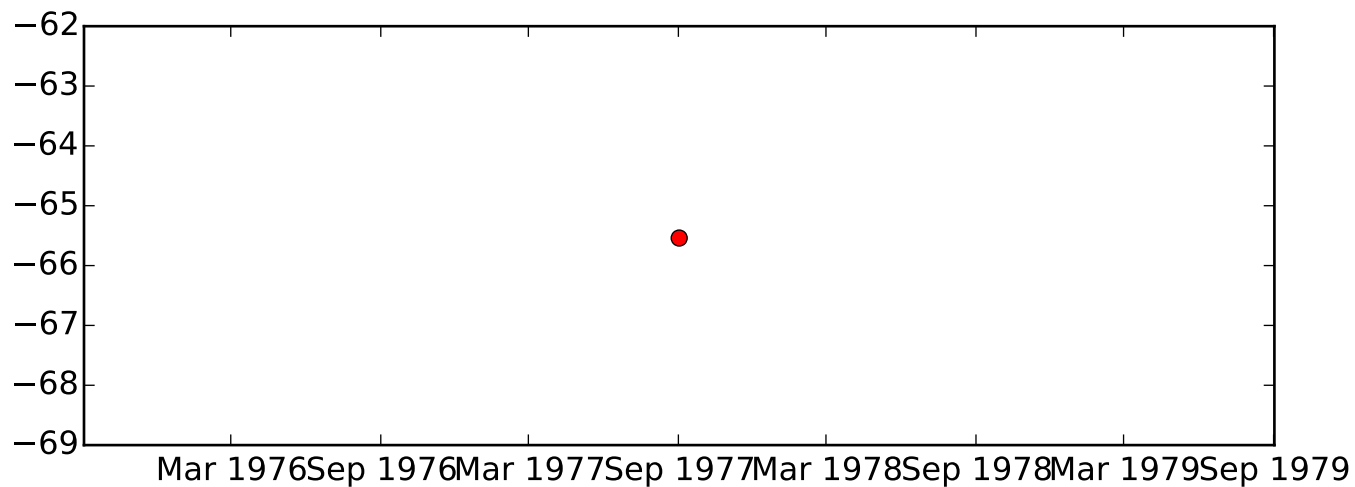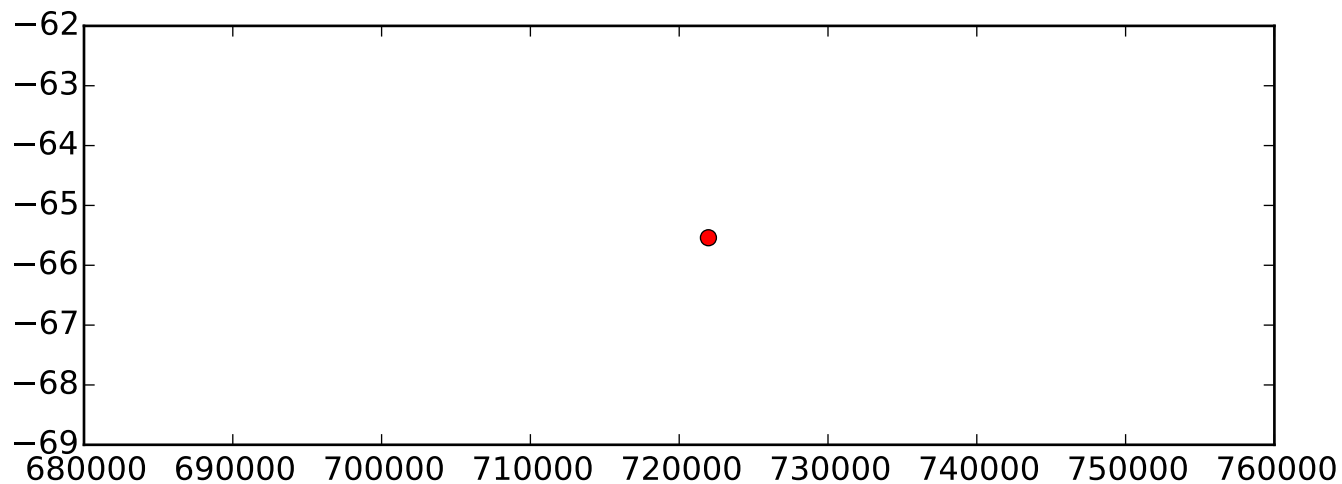

Supplement: Supplementary file 63 [file single_date.pdf › Mac OS X/dist/avlog.app/Contents/Resources/lib/python2.7/matplotlib/tests/baseline_images/test_axes/single_date.pdf]

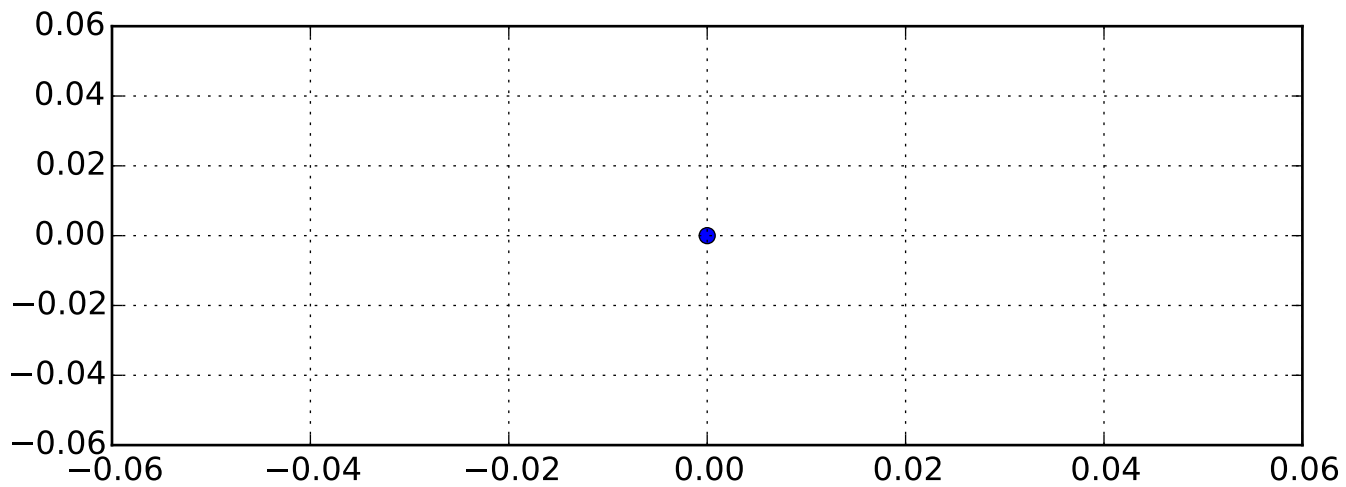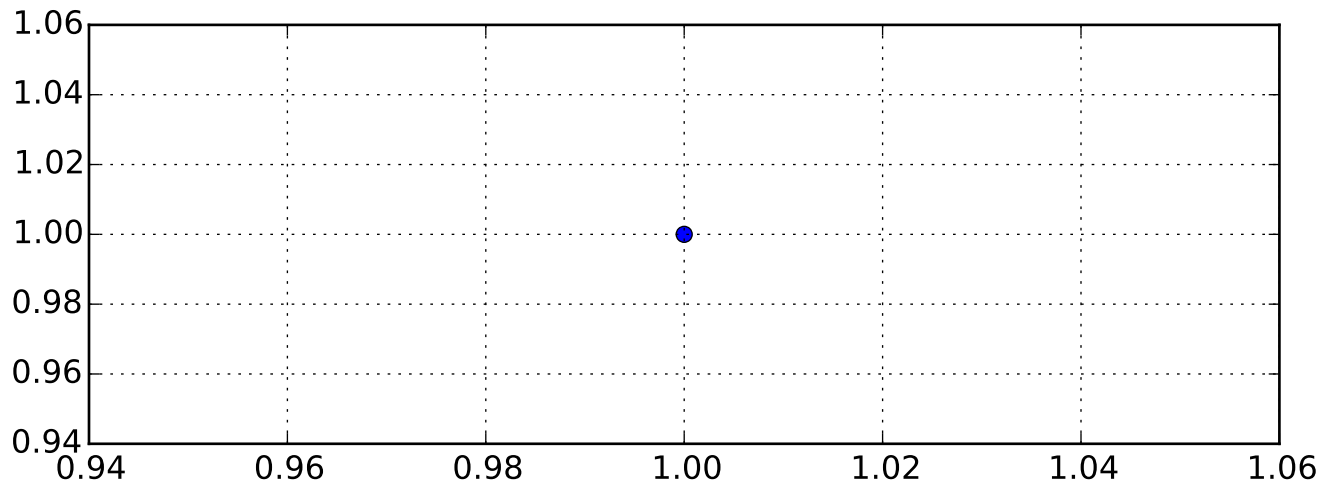

Supplement: Supplementary file 64 [file single_point.pdf › Mac OS X/dist/avlog.app/Contents/Resources/lib/python2.7/matplotlib/tests/baseline_images/test_axes/single_point.pdf]

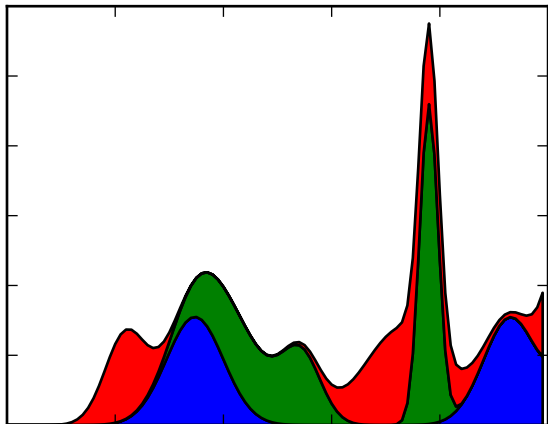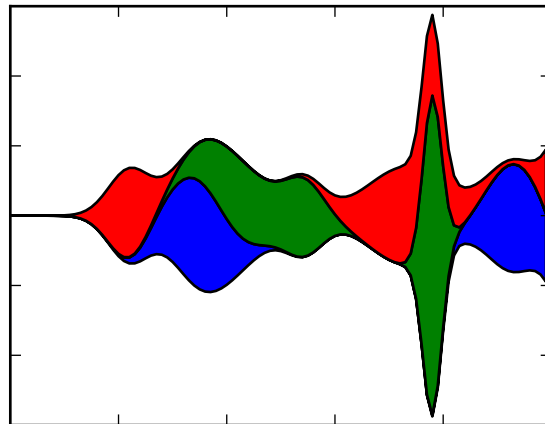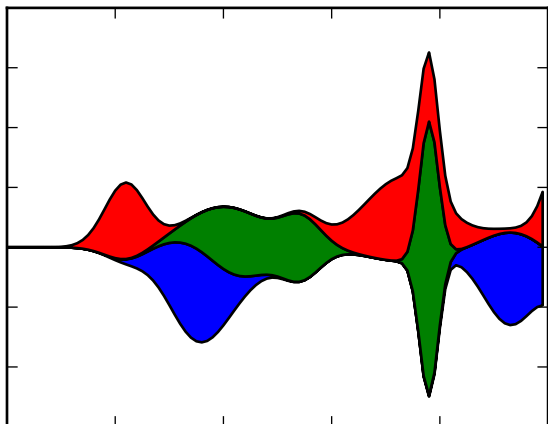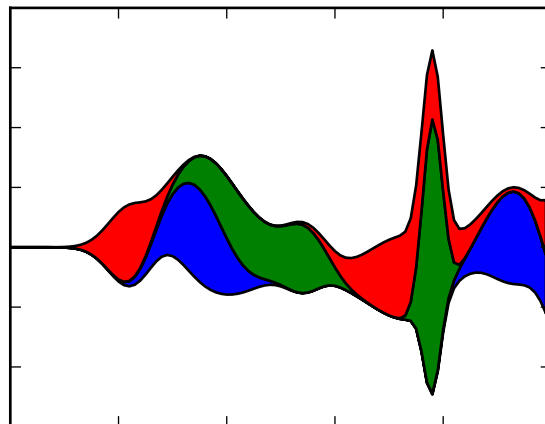

Supplement: Supplementary file 65 [file stackplot_test_baseline.pdf › Mac OS X/dist/avlog.app/Contents/Resources/lib/python2.7/matplotlib/tests/baseline_images/test_axes/stackplot_test_baseline.pdf]

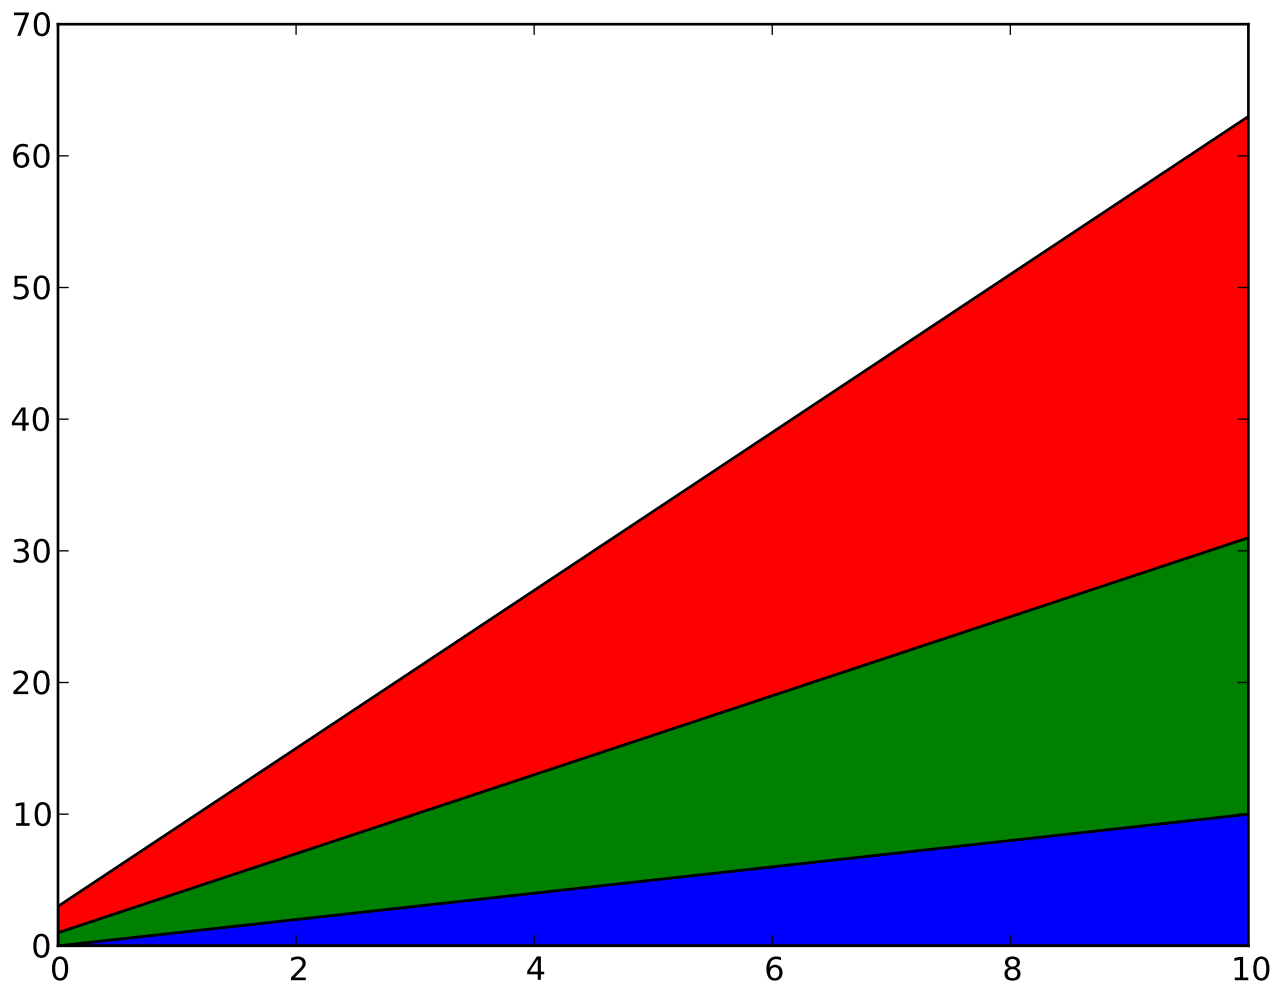

Supplement: Supplementary file 66 [file stackplot_test_image.pdf › Mac OS X/dist/avlog.app/Contents/Resources/lib/python2.7/matplotlib/tests/baseline_images/test_axes/stackplot_test_image.pdf]

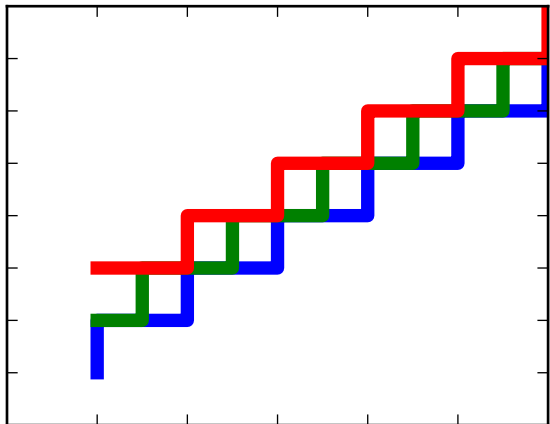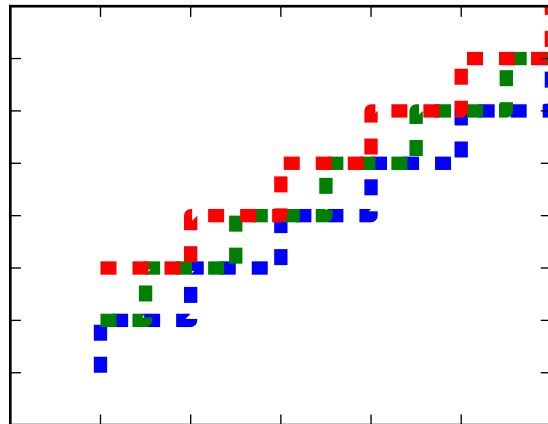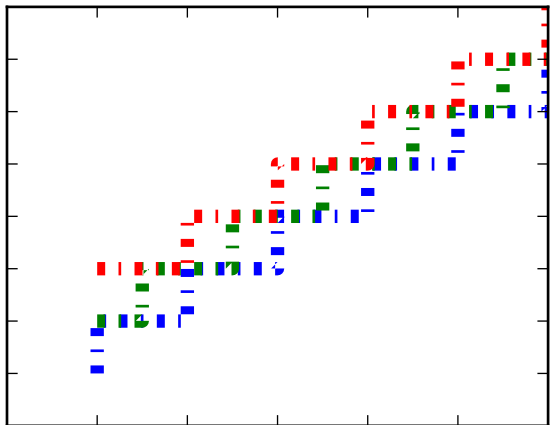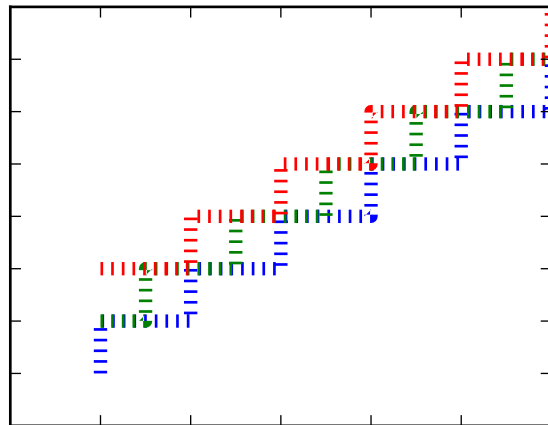

Supplement: Supplementary file 67 [file step_linestyle.pdf › Mac OS X/dist/avlog.app/Contents/Resources/lib/python2.7/matplotlib/tests/baseline_images/test_axes/step_linestyle.pdf]

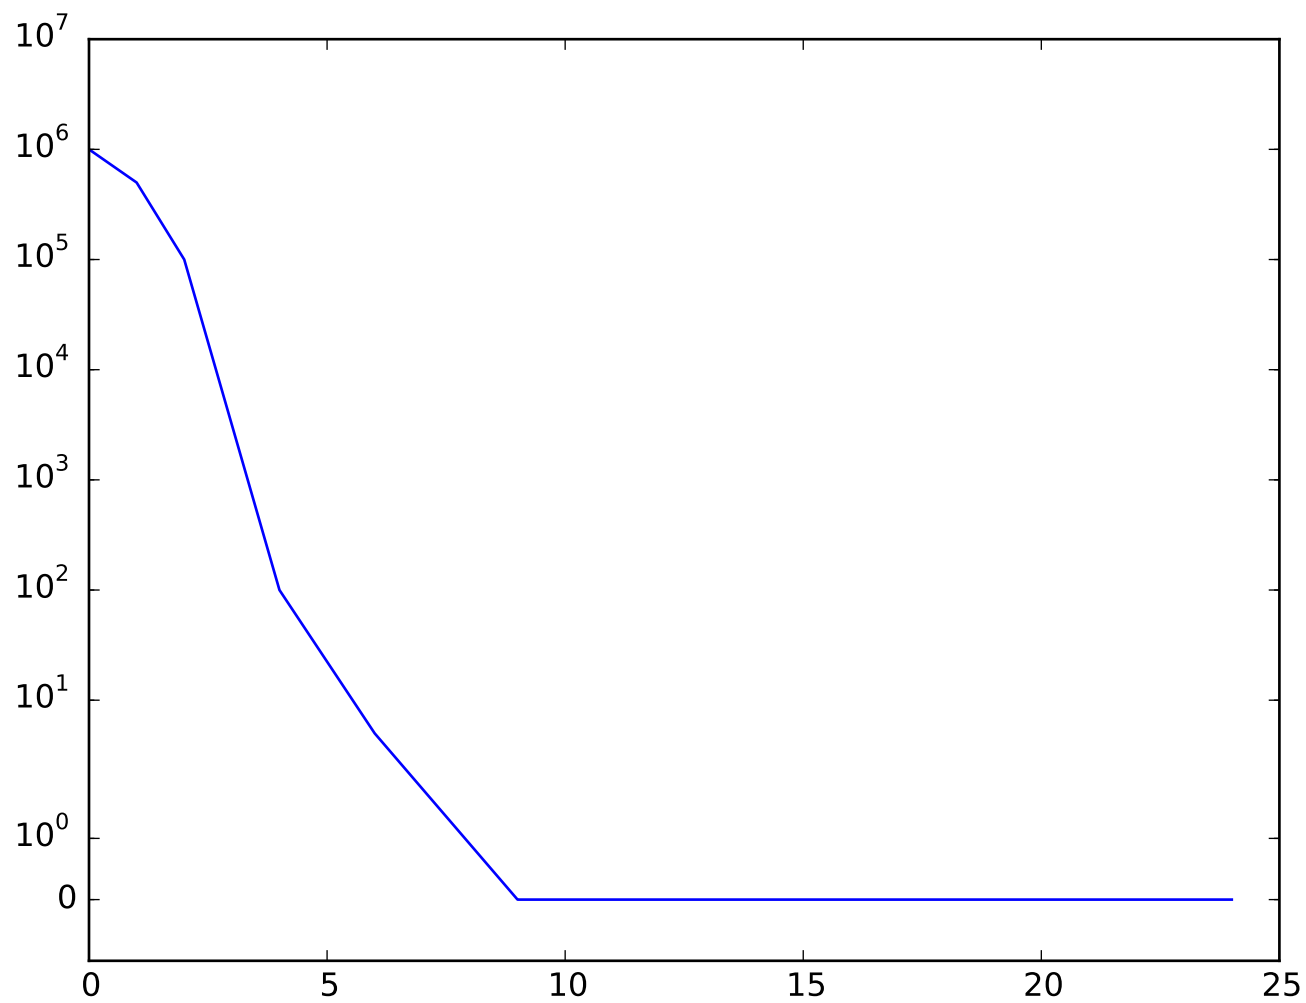

Supplement: Supplementary file 68 [file symlog.pdf › Mac OS X/dist/avlog.app/Contents/Resources/lib/python2.7/matplotlib/tests/baseline_images/test_axes/symlog.pdf]

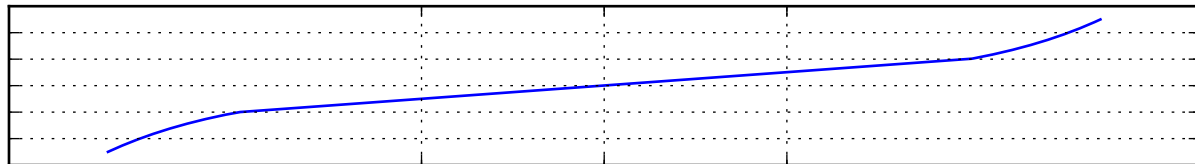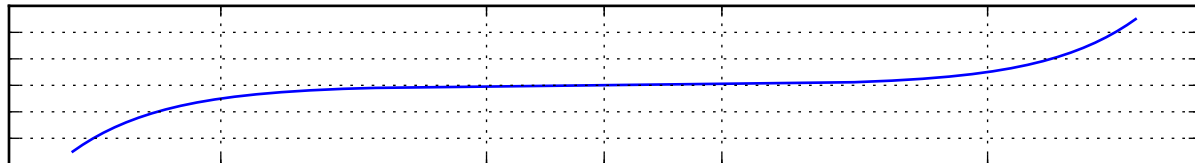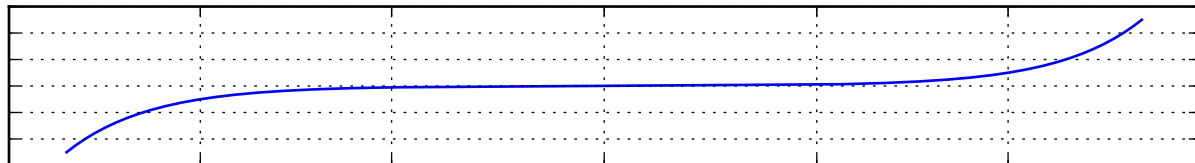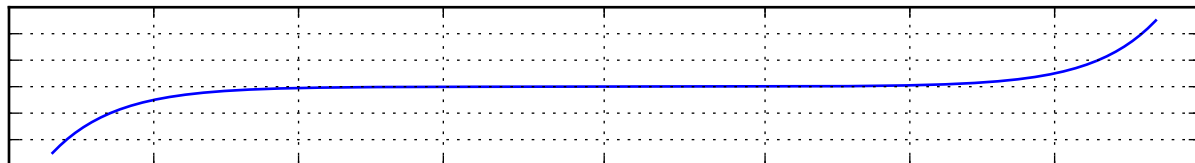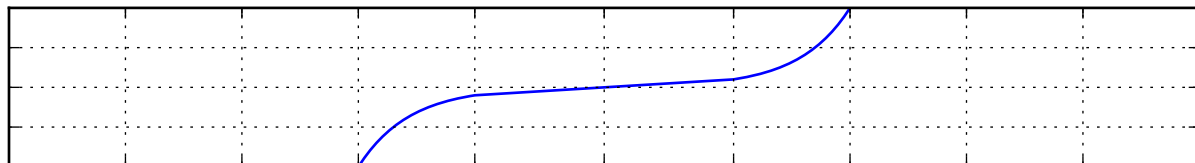

Supplement: Supplementary file 69 [file symlog2.pdf › Mac OS X/dist/avlog.app/Contents/Resources/lib/python2.7/matplotlib/tests/baseline_images/test_axes/symlog2.pdf]

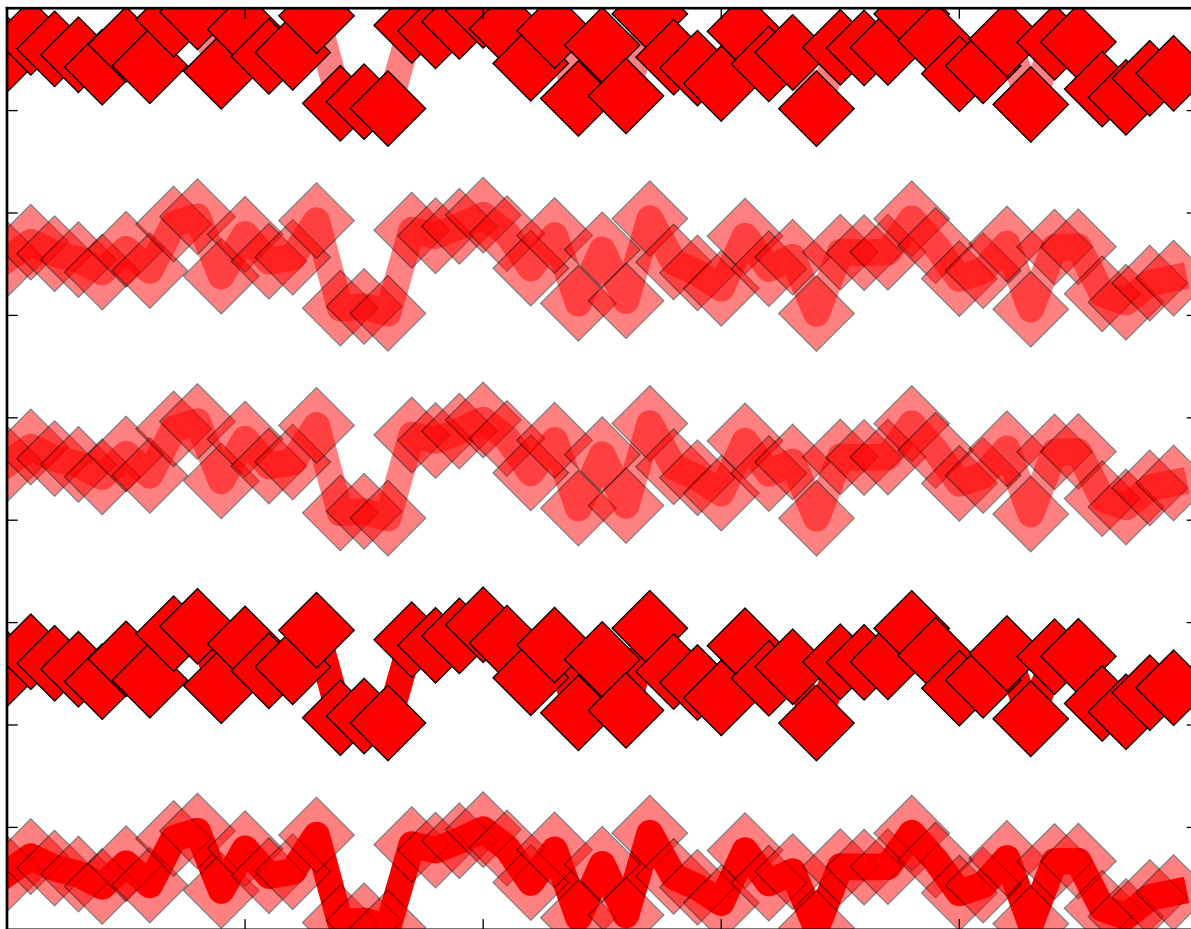

Supplement: Supplementary file 70 [file test_alpha.pdf › Mac OS X/dist/avlog.app/Contents/Resources/lib/python2.7/matplotlib/tests/baseline_images/test_axes/test_alpha.pdf]

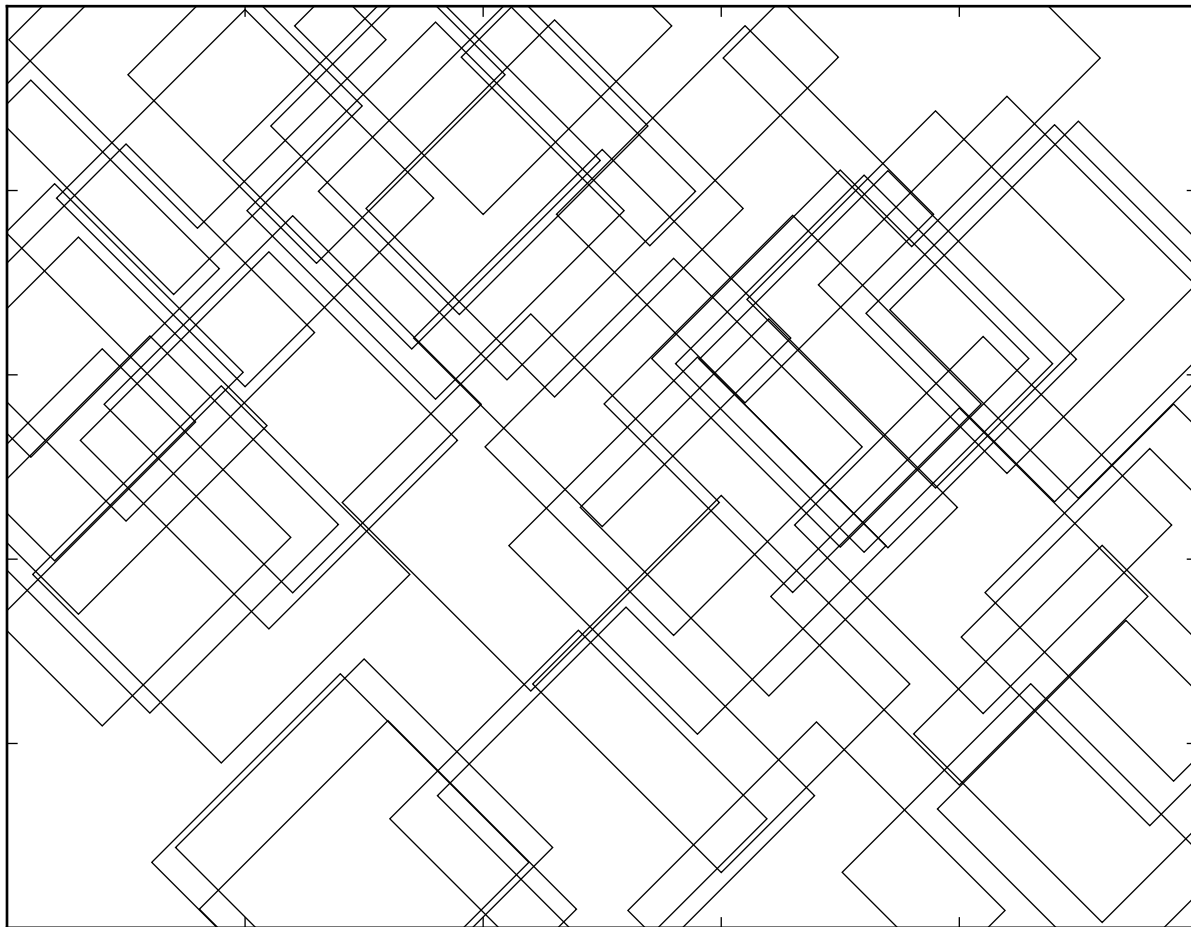

Supplement: Supplementary file 71 [file transparent_markers.pdf › Mac OS X/dist/avlog.app/Contents/Resources/lib/python2.7/matplotlib/tests/baseline_images/test_axes/transparent_markers.pdf]

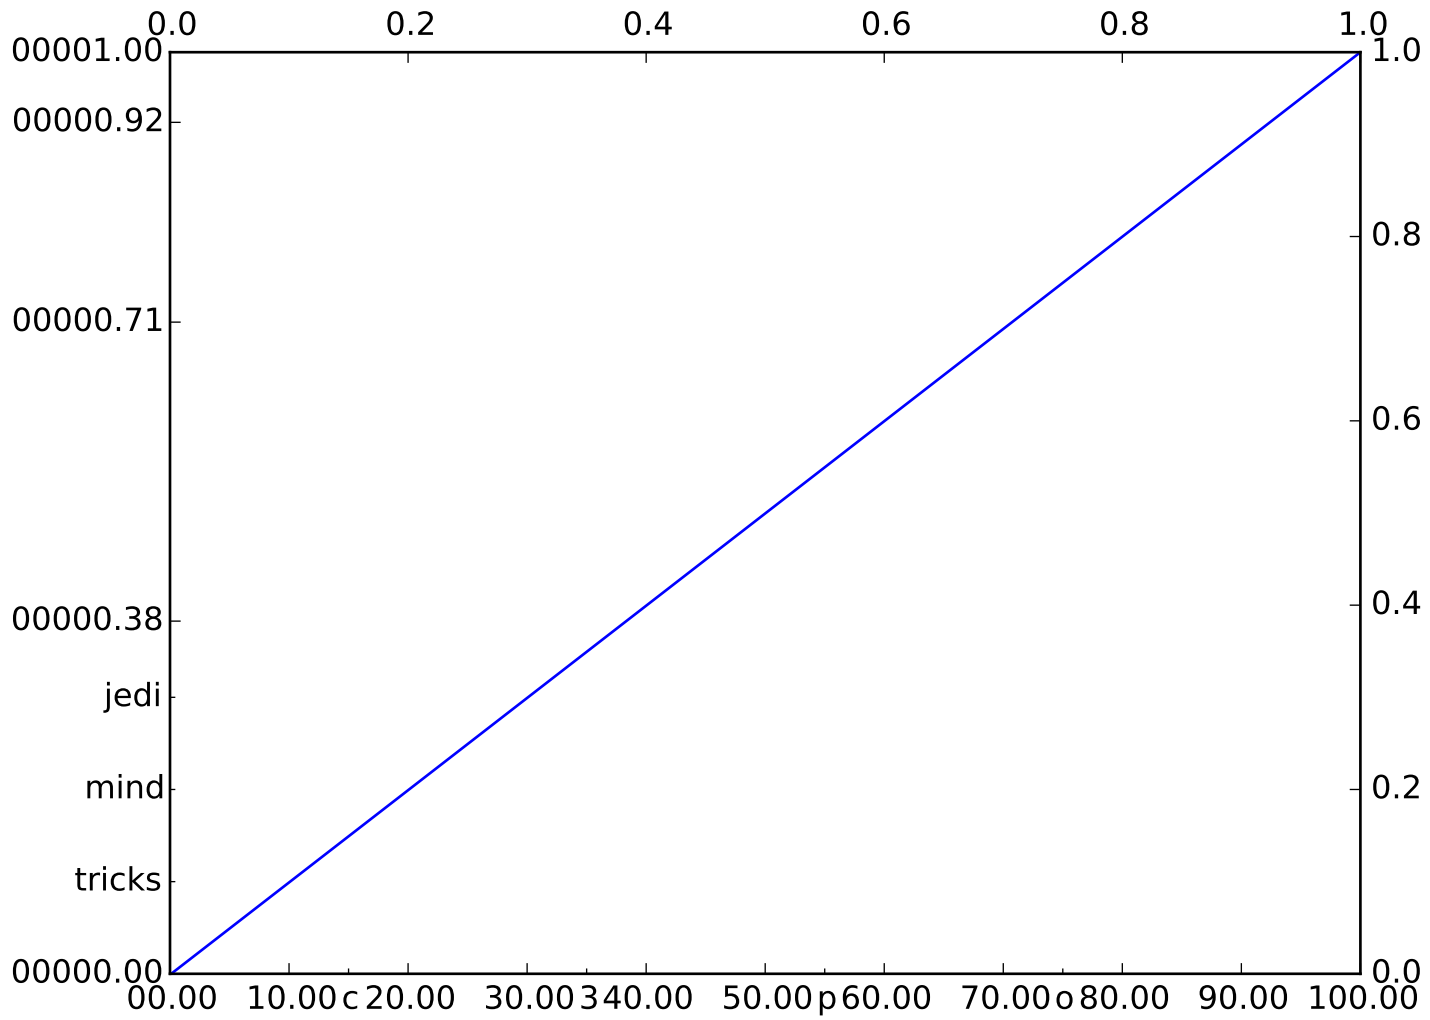

Supplement: Supplementary file 72 [file twin_axis_locaters_formatters.pdf › Mac OS X/dist/avlog.app/Contents/Resources/lib/python2.7/matplotlib/tests/baseline_images/test_axes/twin_axis_locaters_formatters.pdf]

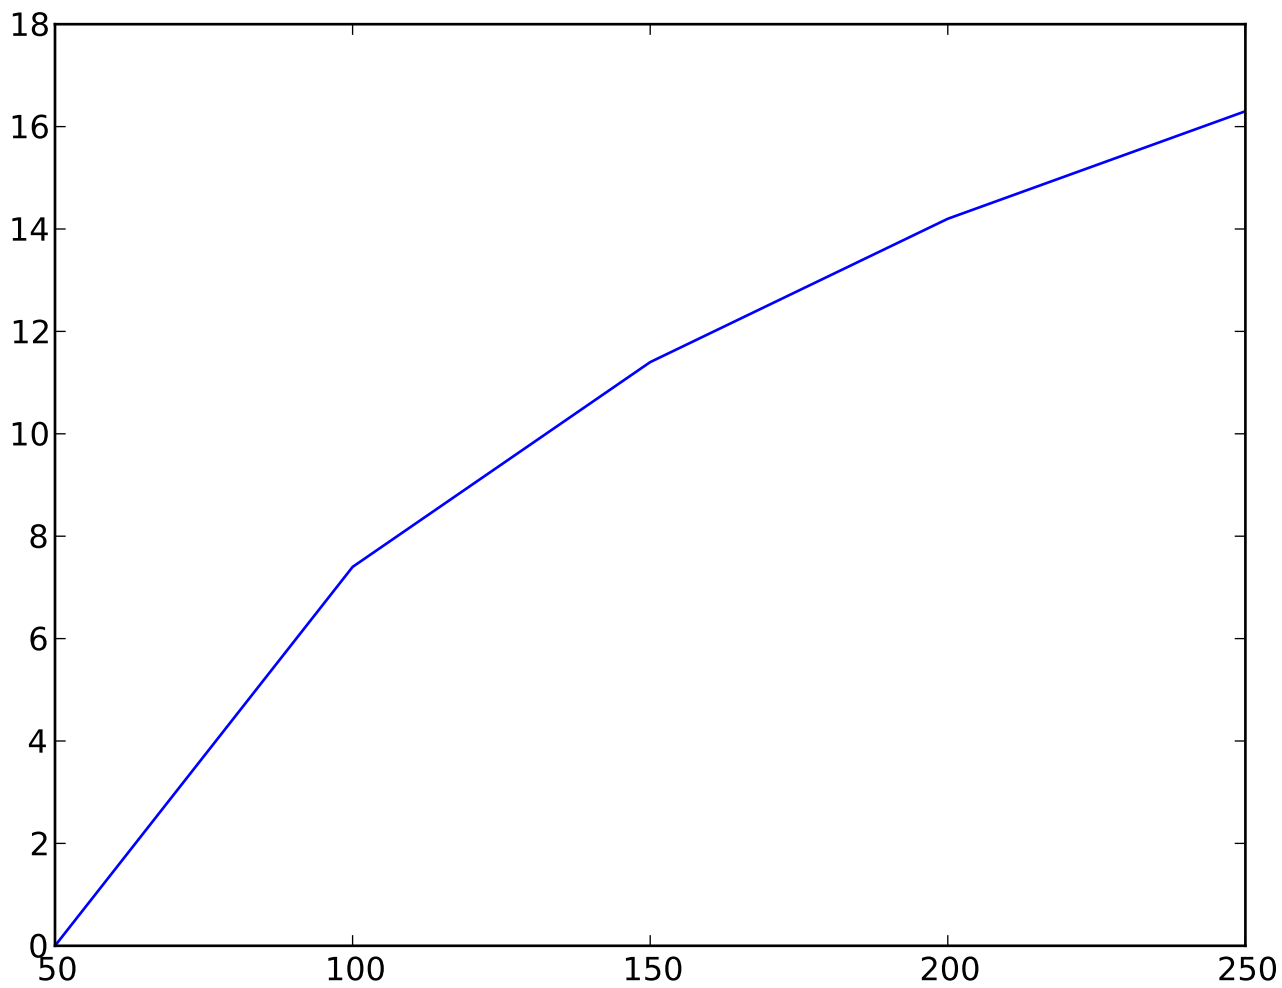

Supplement: Supplementary file 73 [file units_strings.pdf › Mac OS X/dist/avlog.app/Contents/Resources/lib/python2.7/matplotlib/tests/baseline_images/test_axes/units_strings.pdf]

axvline and axhline zorder test

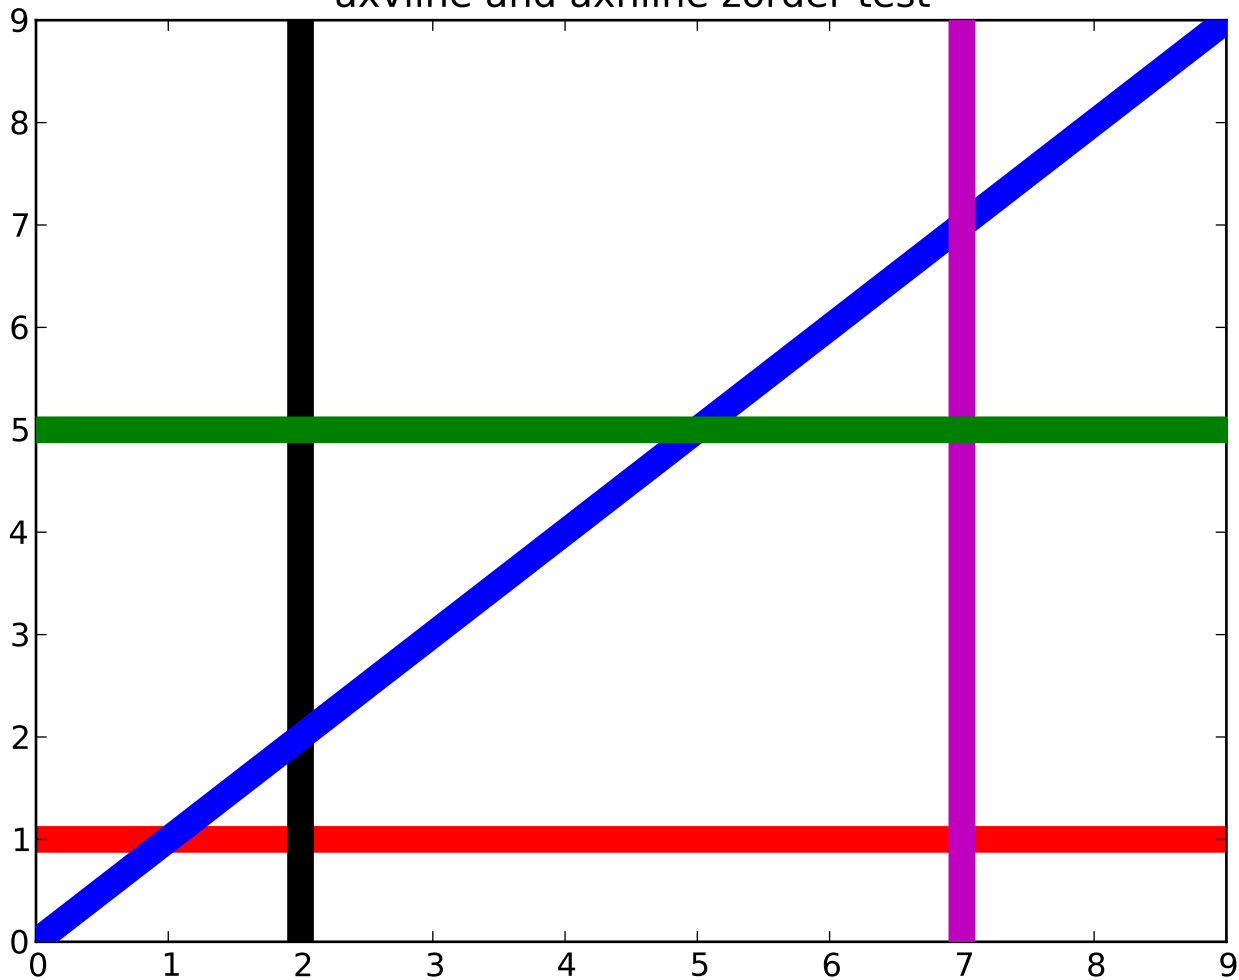

Supplement: Supplementary file 74 [file vline_hline_zorder.pdf › Mac OS X/dist/avlog.app/Contents/Resources/lib/python2.7/matplotlib/tests/baseline_images/test_axes/vline_hline_zorder.pdf]

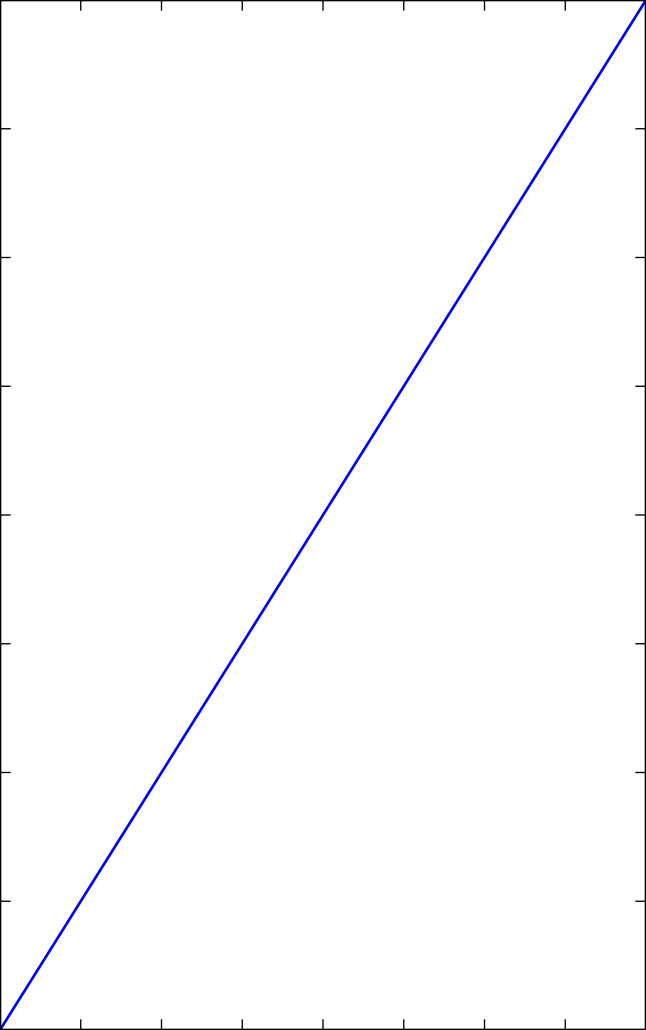

Supplement: Supplementary file 76 [file pgf_bbox_inches.pdf › Mac OS X/dist/avlog.app/Contents/Resources/lib/python2.7/matplotlib/tests/baseline_images/test_backend_pgf/pgf_bbox_inches.pdf]

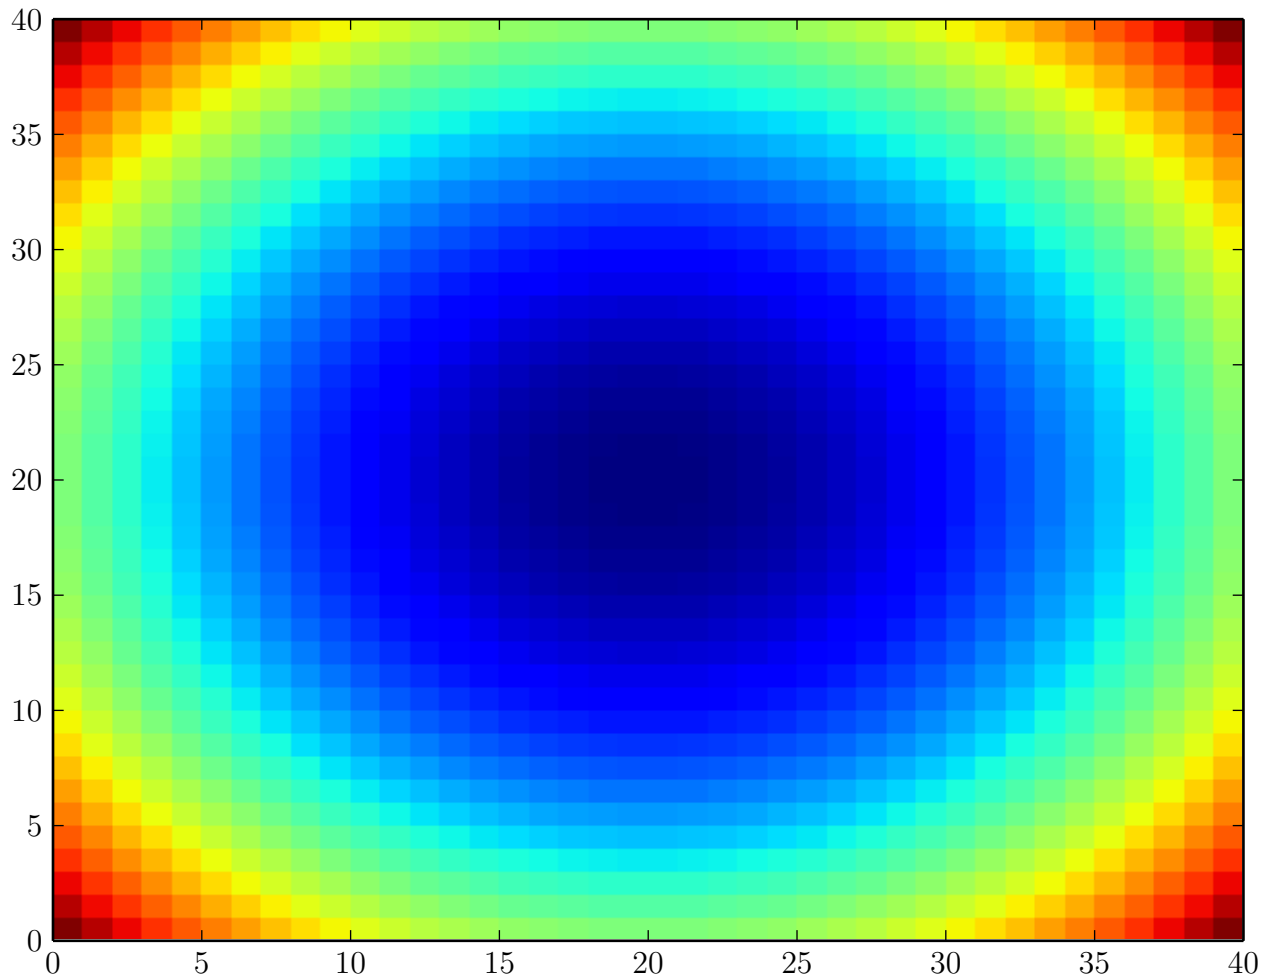

Supplement: Supplementary file 77 [file pgf_mixedmode.pdf › Mac OS X/dist/avlog.app/Contents/Resources/lib/python2.7/matplotlib/tests/baseline_images/test_backend_pgf/pgf_mixedmode.pdf]

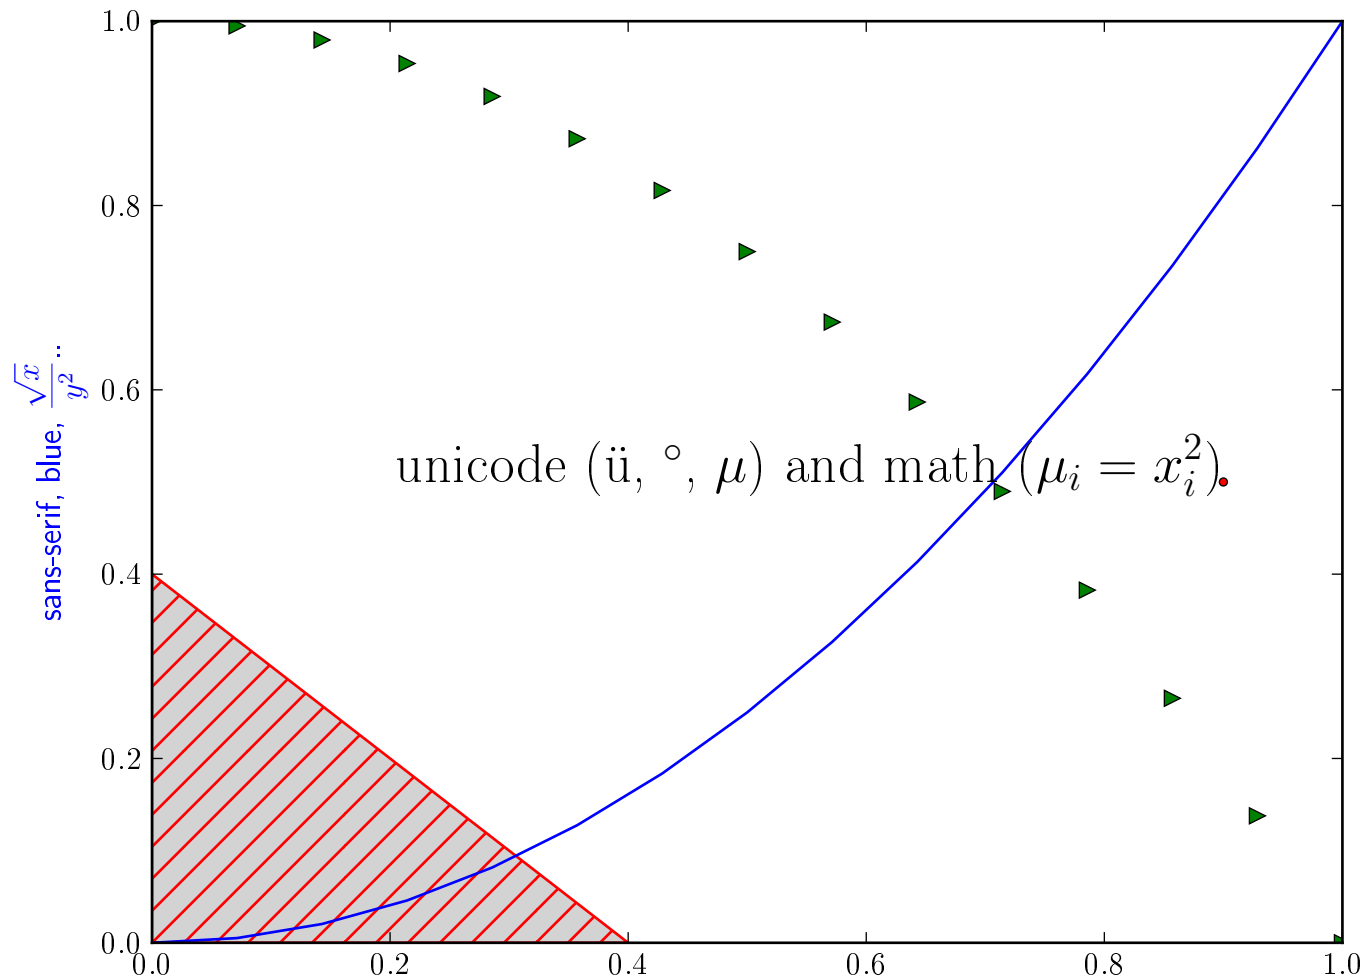

Supplement: Supplementary file 78 [file pgf_pdflatex.pdf › Mac OS X/dist/avlog.app/Contents/Resources/lib/python2.7/matplotlib/tests/baseline_images/test_backend_pgf/pgf_pdflatex.pdf]

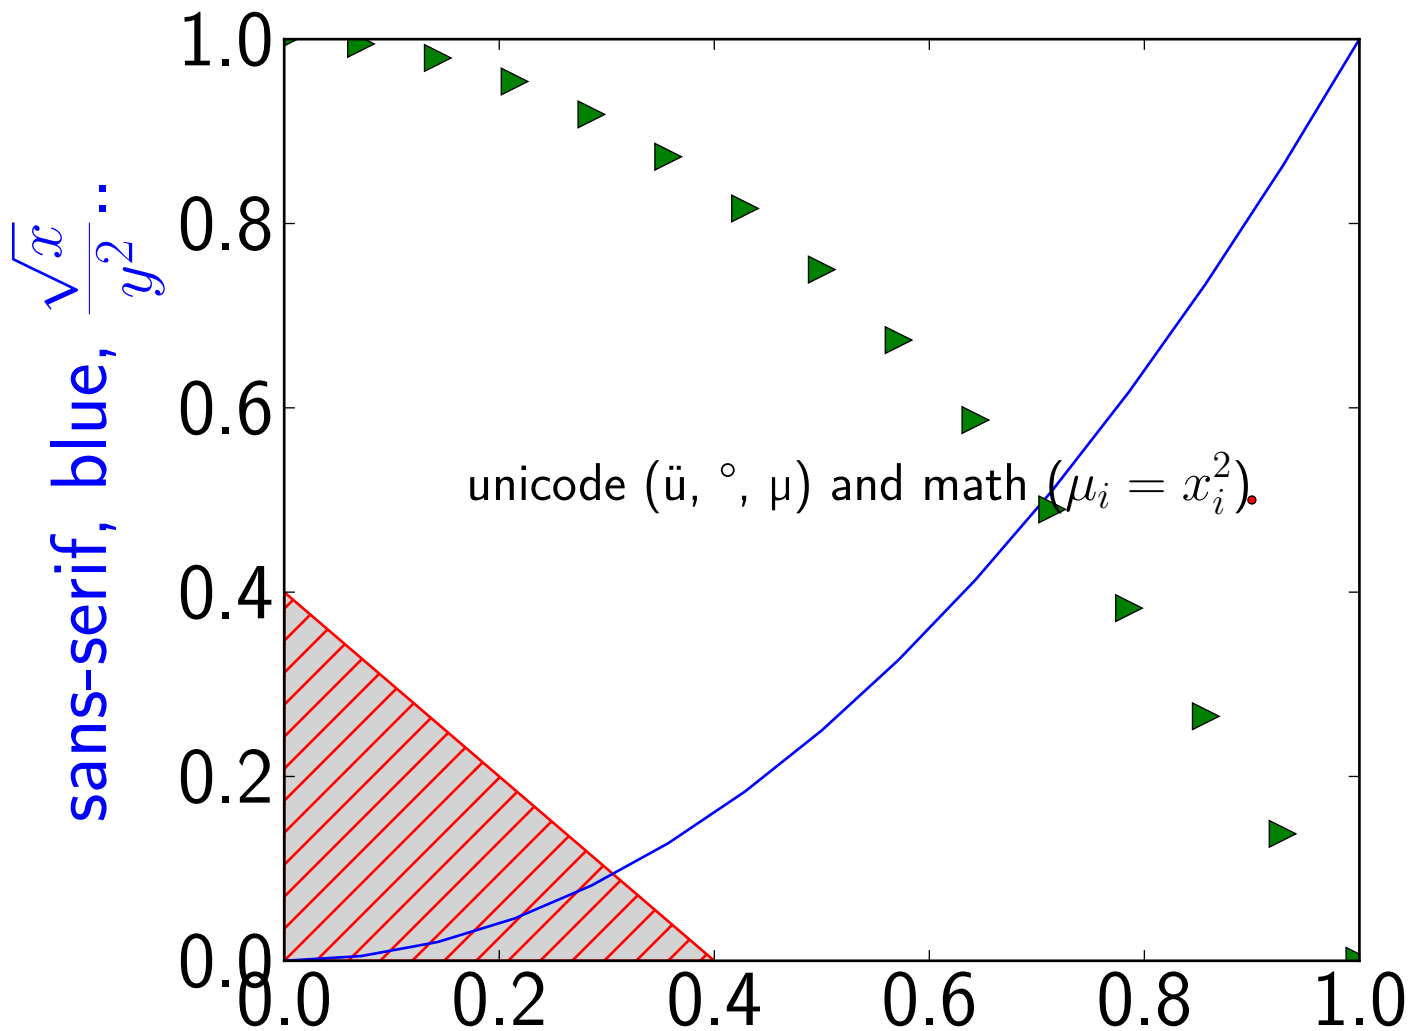

Supplement: Supplementary file 79 [file pgf_rcupdate1.pdf › Mac OS X/dist/avlog.app/Contents/Resources/lib/python2.7/matplotlib/tests/baseline_images/test_backend_pgf/pgf_rcupdate1.pdf]

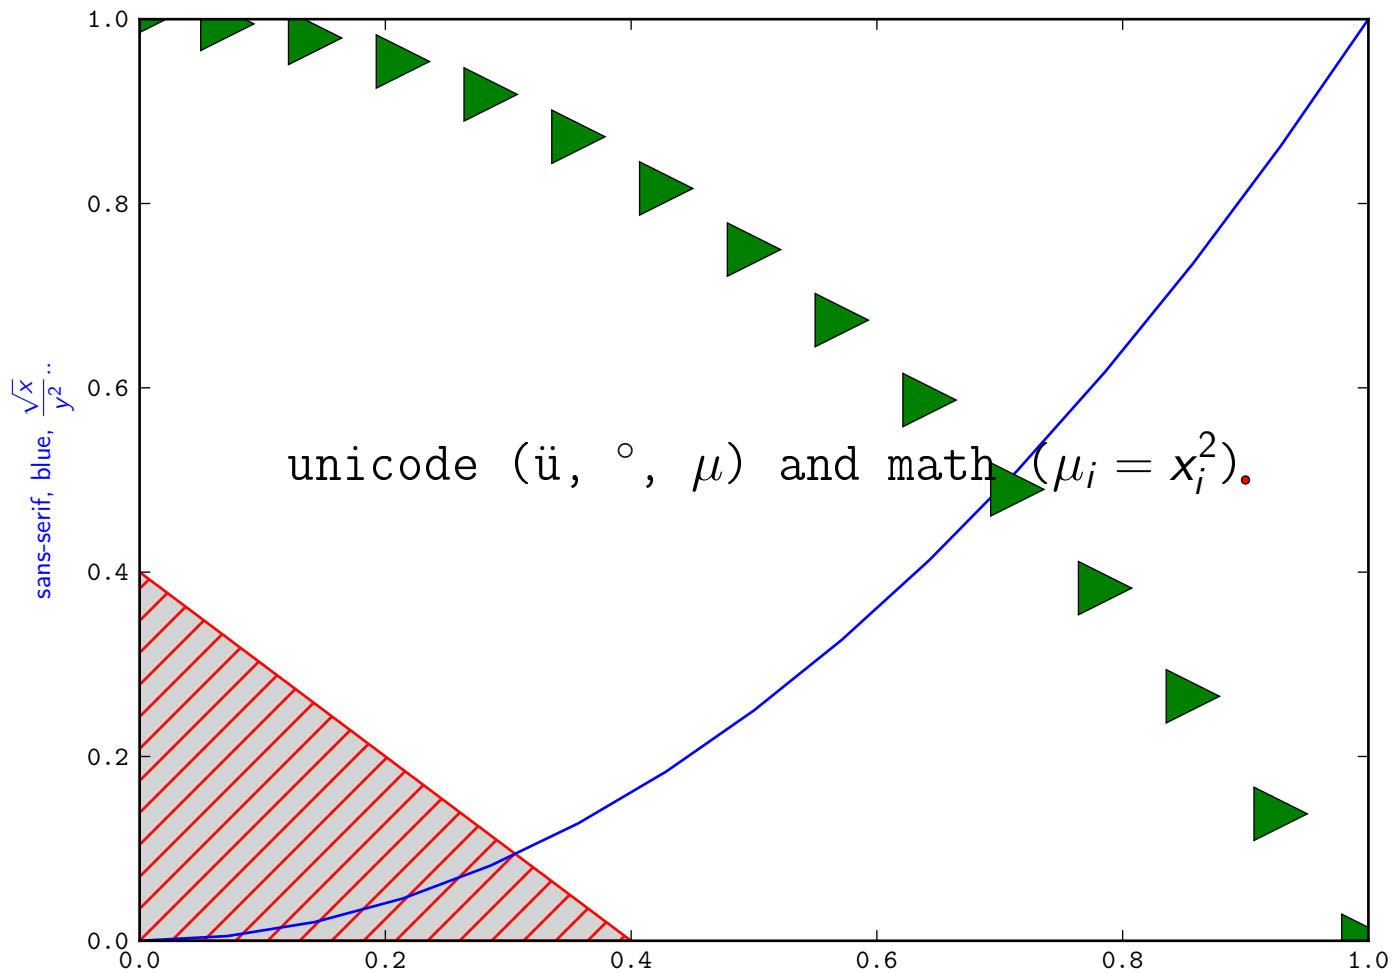

Supplement: Supplementary file 80 [file pgf_rcupdate2.pdf › Mac OS X/dist/avlog.app/Contents/Resources/lib/python2.7/matplotlib/tests/baseline_images/test_backend_pgf/pgf_rcupdate2.pdf]

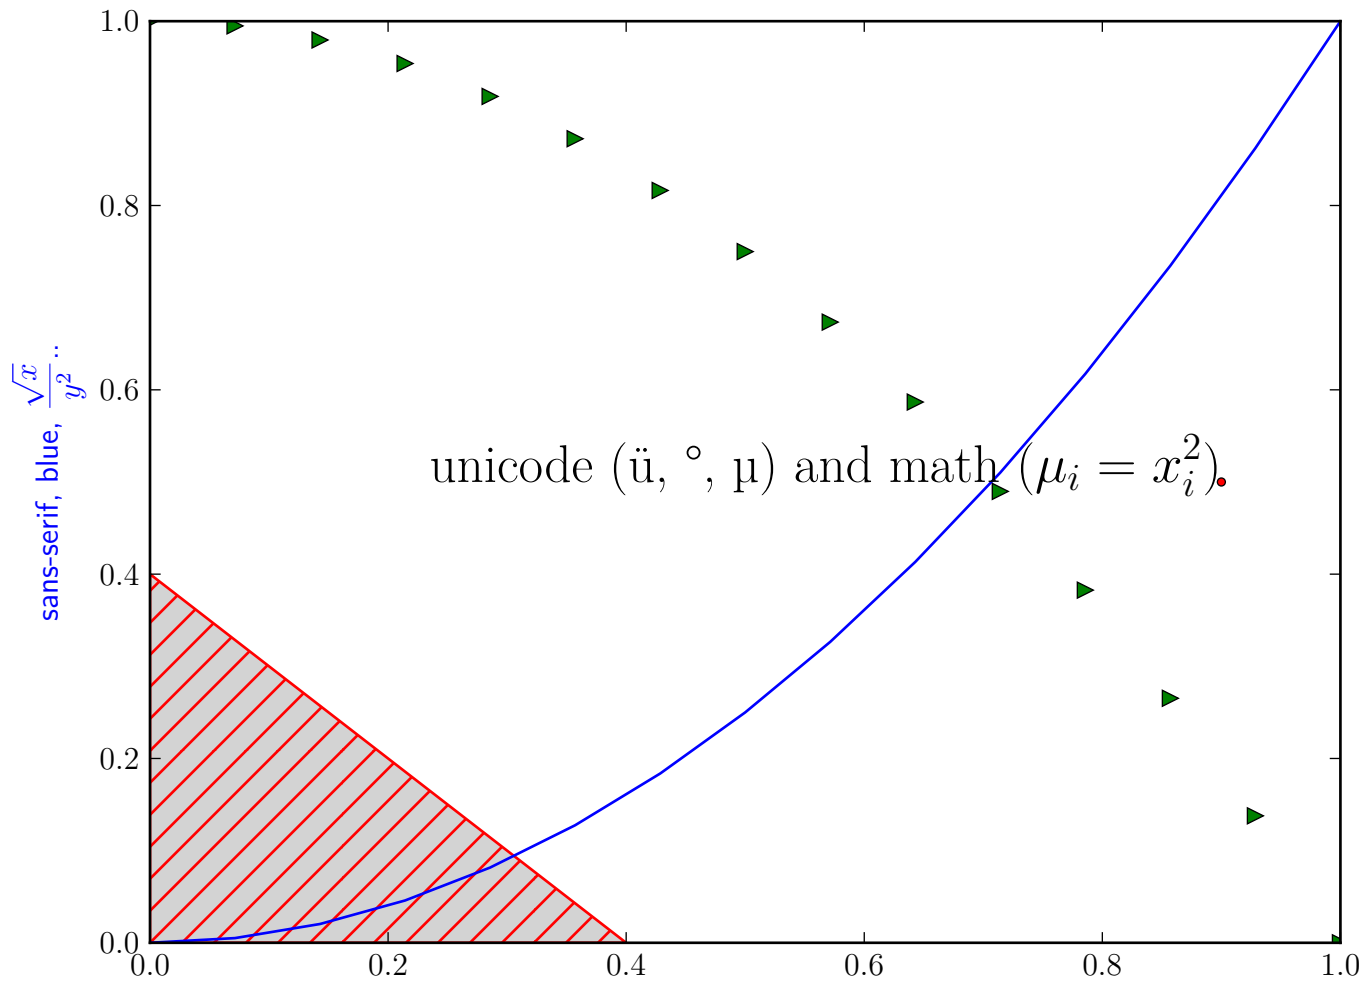

Supplement: Supplementary file 81 [file pgf_xelatex.pdf › Mac OS X/dist/avlog.app/Contents/Resources/lib/python2.7/matplotlib/tests/baseline_images/test_backend_pgf/pgf_xelatex.pdf]

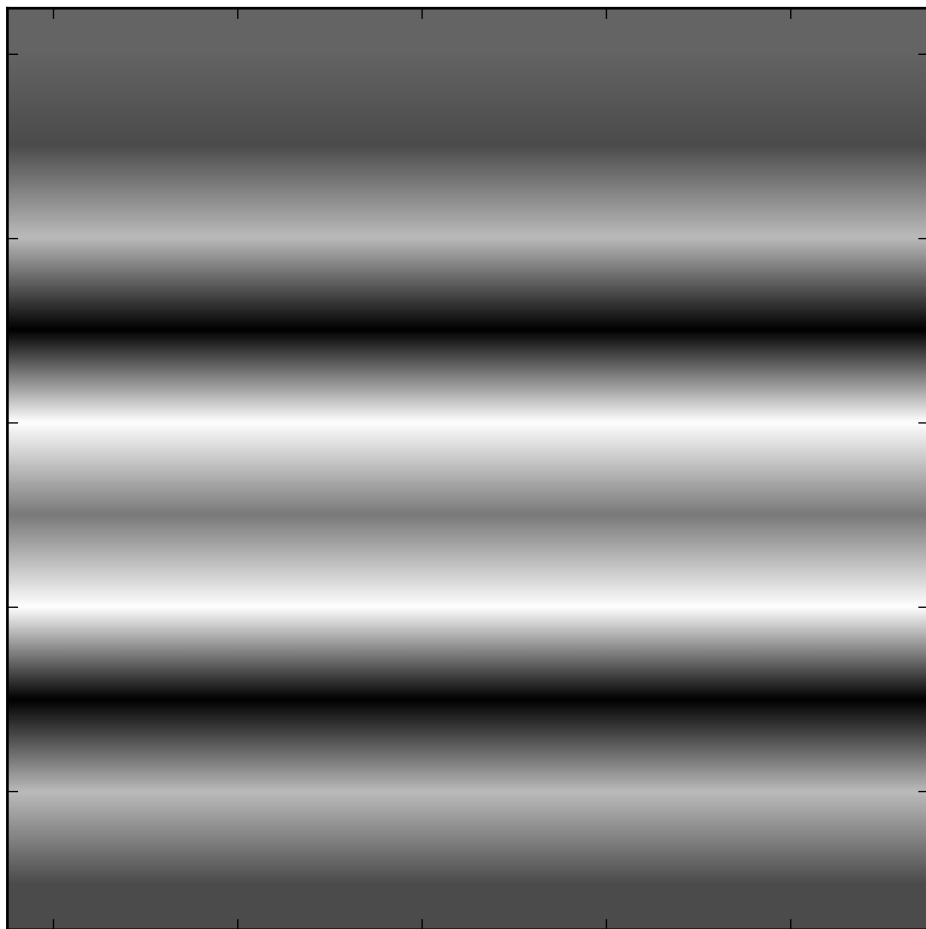

Supplement: Supplementary file 82 [file noscale.pdf › Mac OS X/dist/avlog.app/Contents/Resources/lib/python2.7/matplotlib/tests/baseline_images/test_backend_svg/noscale.pdf]

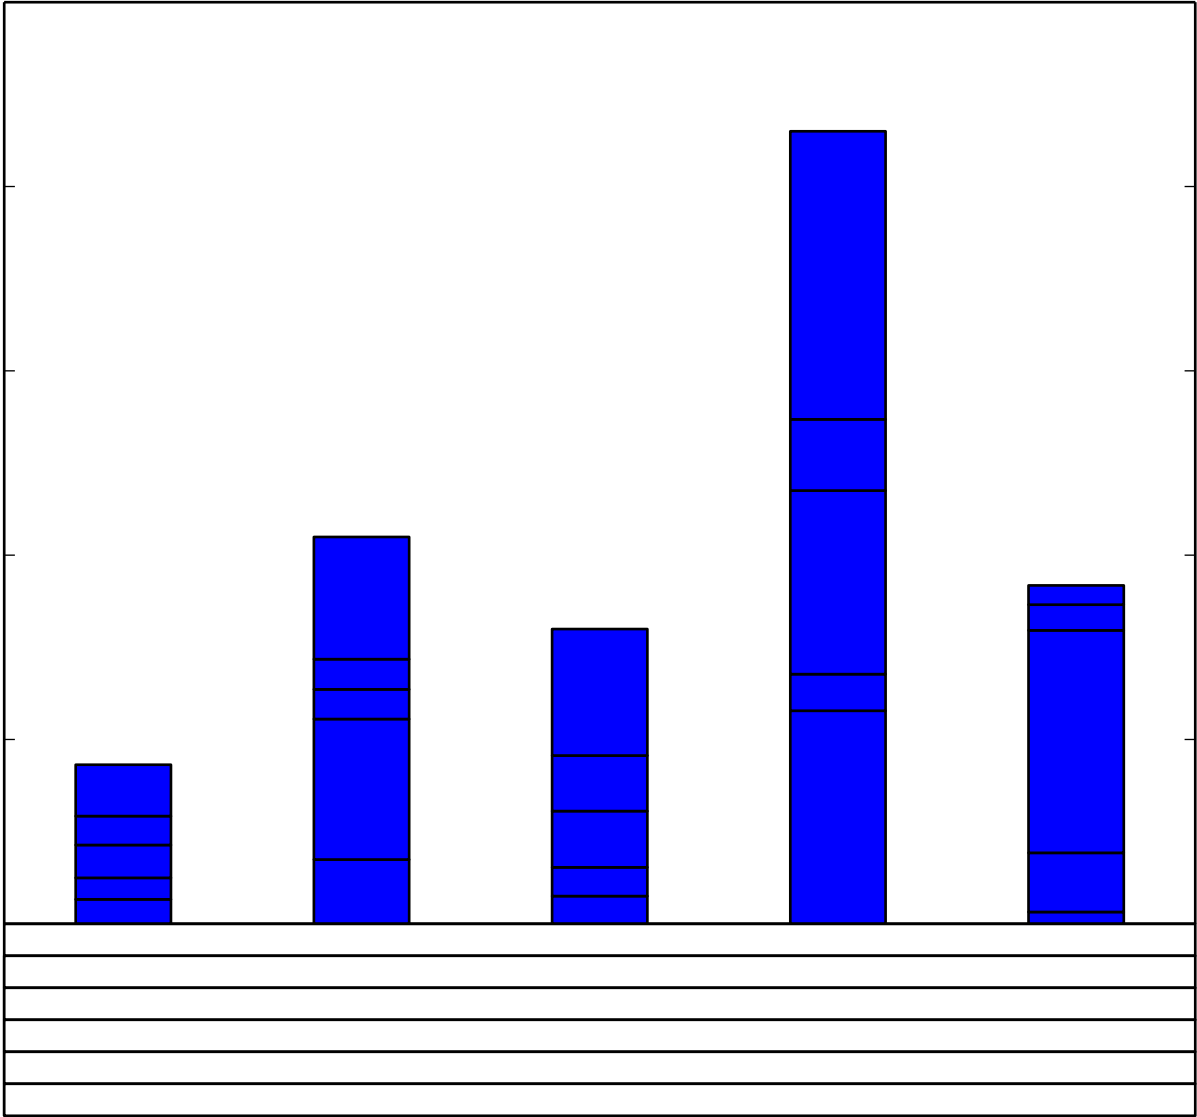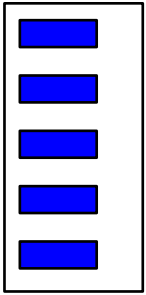

Supplement: Supplementary file 83 [file bbox_inches_tight.pdf › Mac OS X/dist/avlog.app/Contents/Resources/lib/python2.7/matplotlib/tests/baseline_images/test_bbox_tight/bbox_inches_tight.pdf]

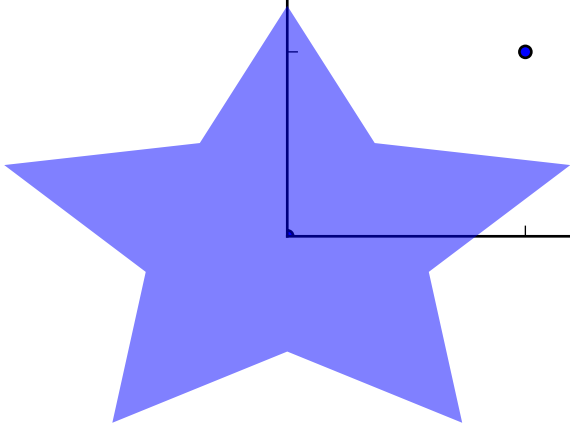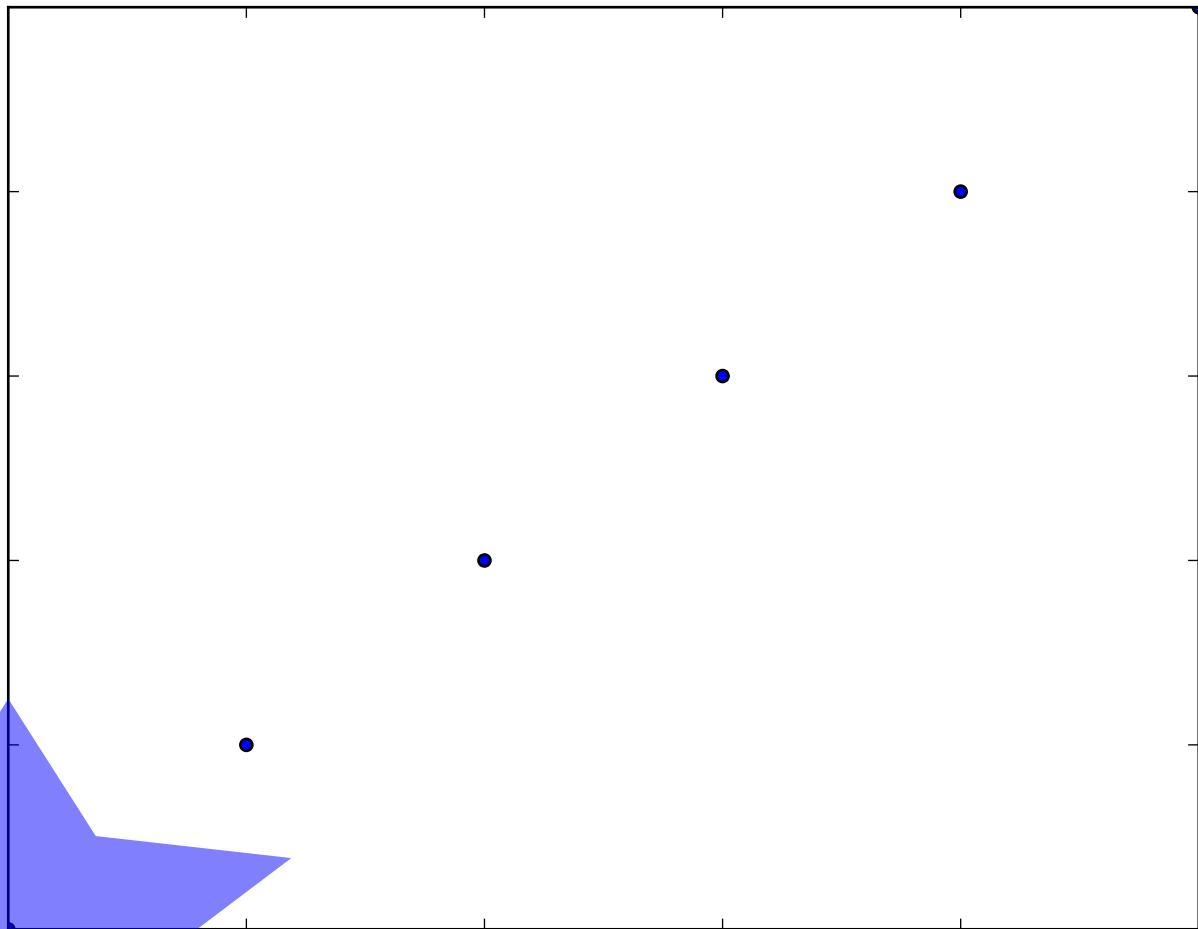

Supplement: Supplementary file 84 [file bbox_inches_tight_clipping.pdf › Mac OS X/dist/avlog.app/Contents/Resources/lib/python2.7/matplotlib/tests/baseline_images/test_bbox_tight/bbox_inches_tight_clipping.pdf]

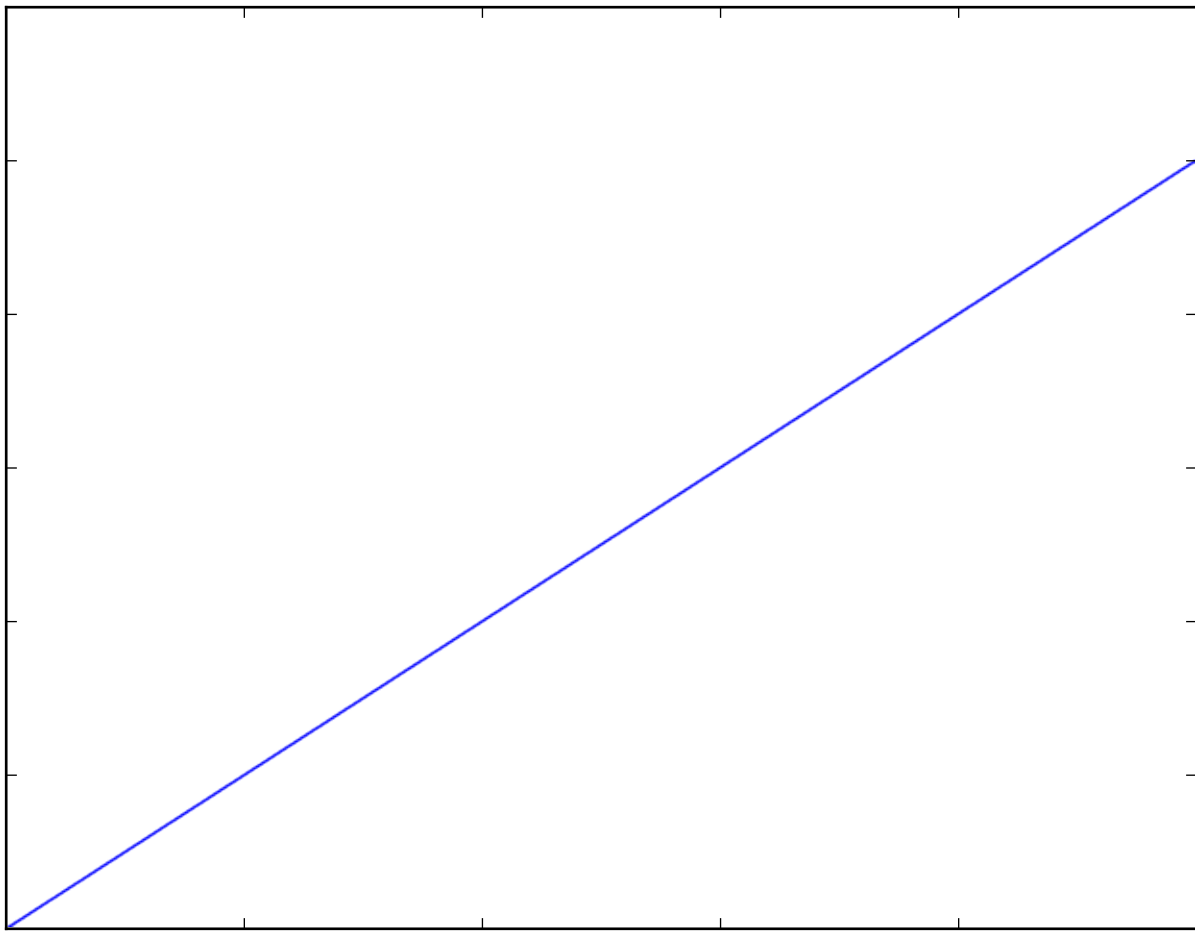

Supplement: Supplementary file 85 [file bbox_inches_tight_raster.pdf › Mac OS X/dist/avlog.app/Contents/Resources/lib/python2.7/matplotlib/tests/baseline_images/test_bbox_tight/bbox_inches_tight_raster.pdf]

Figure title

Axis title

The number 4

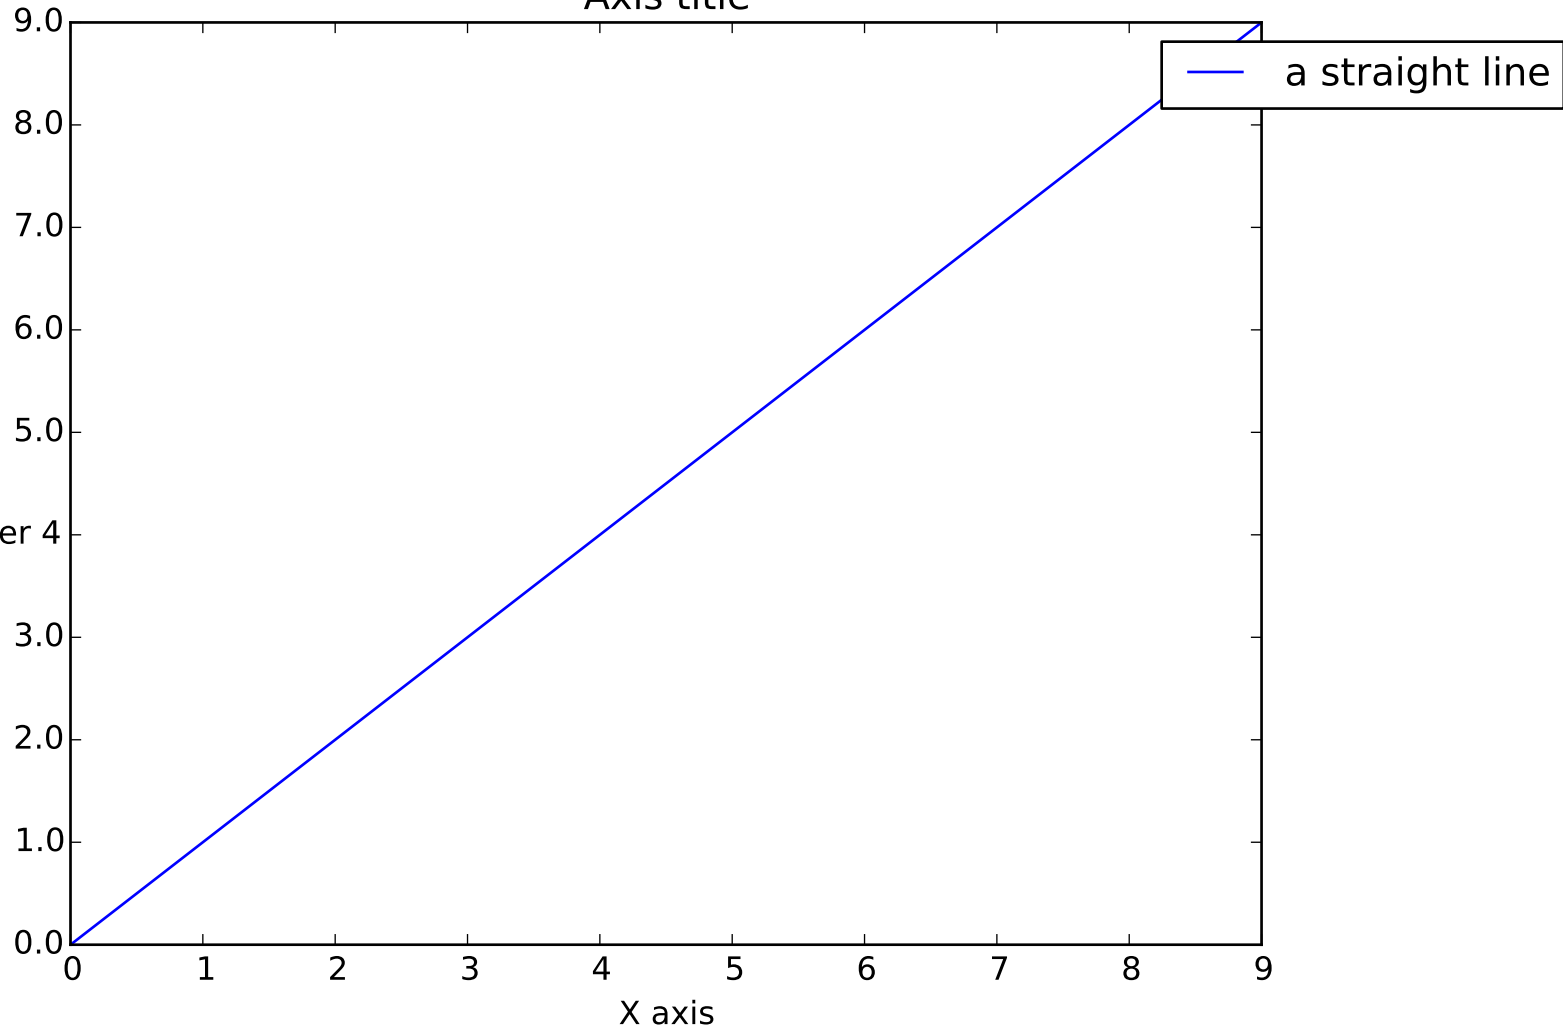

Supplement: Supplementary file 86 [file bbox_inches_tight_suptile_legend.pdf › Mac OS X/dist/avlog.app/Contents/Resources/lib/python2.7/matplotlib/tests/baseline_images/test_bbox_tight/bbox_inches_tight_suptile_legend.pdf]

EventCollection: add\_positions

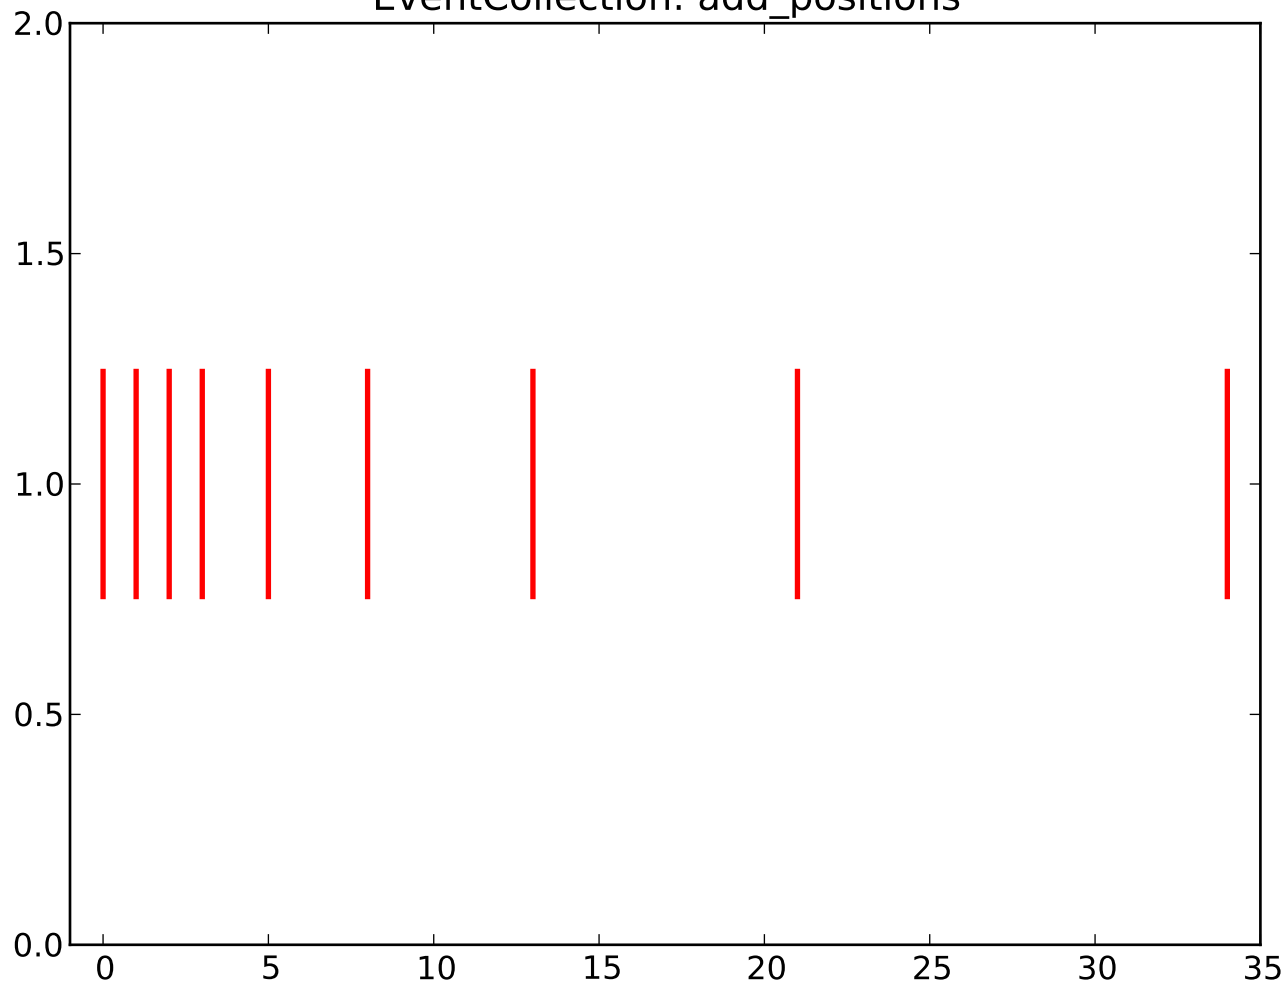

Supplement: Supplementary file 87 [file EventCollection_plot__add_positions.pdf › Mac OS X/dist/avlog.app/Contents/Resources/lib/python2.7/matplotlib/tests/baseline_images/test_collections/EventCollection_plot__add_positions.pdf]

EventCollection: append\_positions

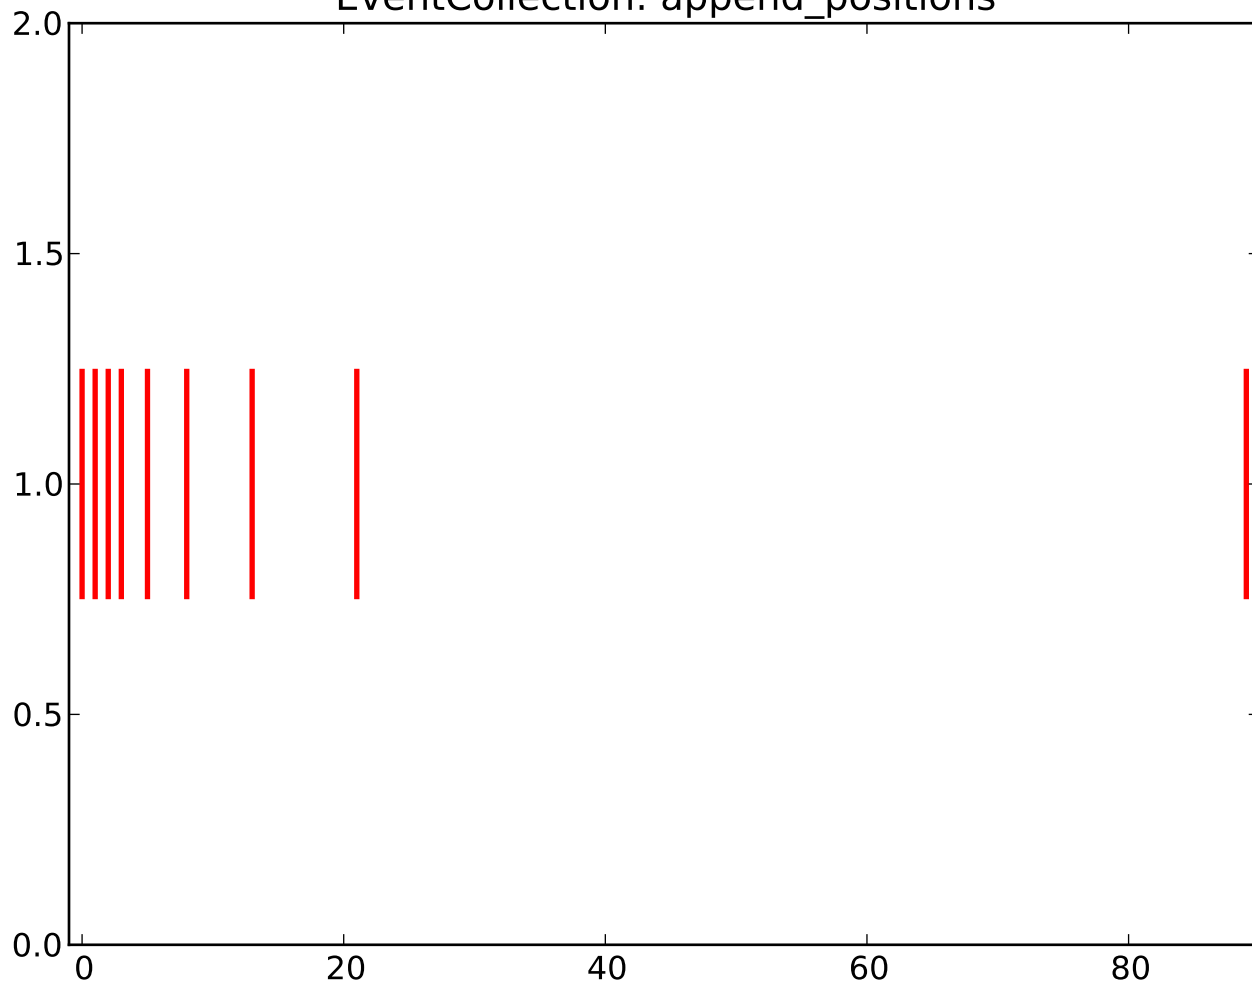

Supplement: Supplementary file 88 [file EventCollection_plot__append_positions.pdf › Mac OS X/dist/avlog.app/Contents/Resources/lib/python2.7/matplotlib/tests/baseline_images/test_collections/EventCollection_plot__append_positions.pdf]

EventCollection: default

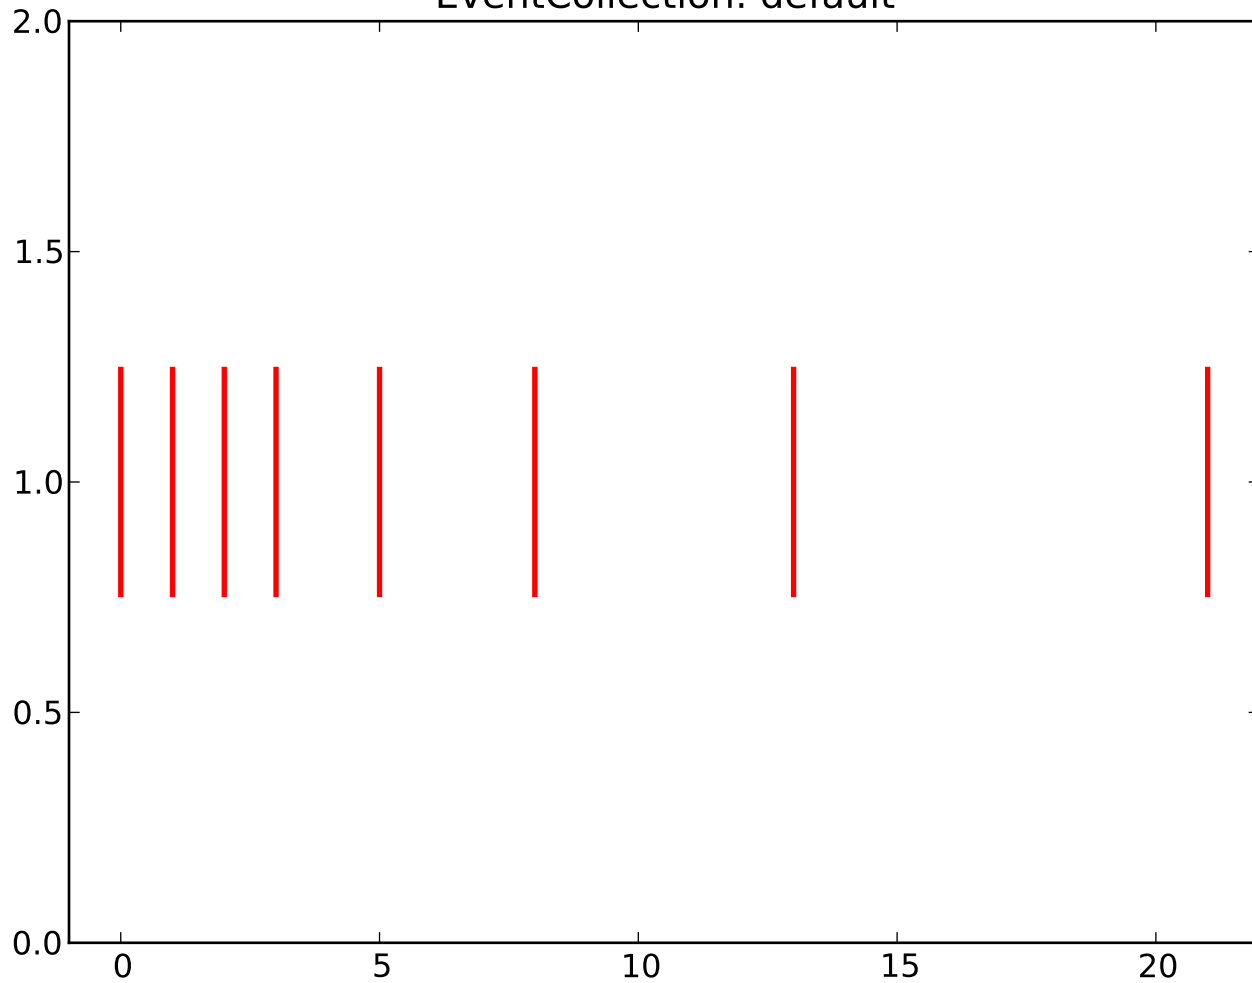

Supplement: Supplementary file 89 [file EventCollection_plot__default.pdf › Mac OS X/dist/avlog.app/Contents/Resources/lib/python2.7/matplotlib/tests/baseline_images/test_collections/EventCollection_plot__default.pdf]

EventCollection: extend\_positions

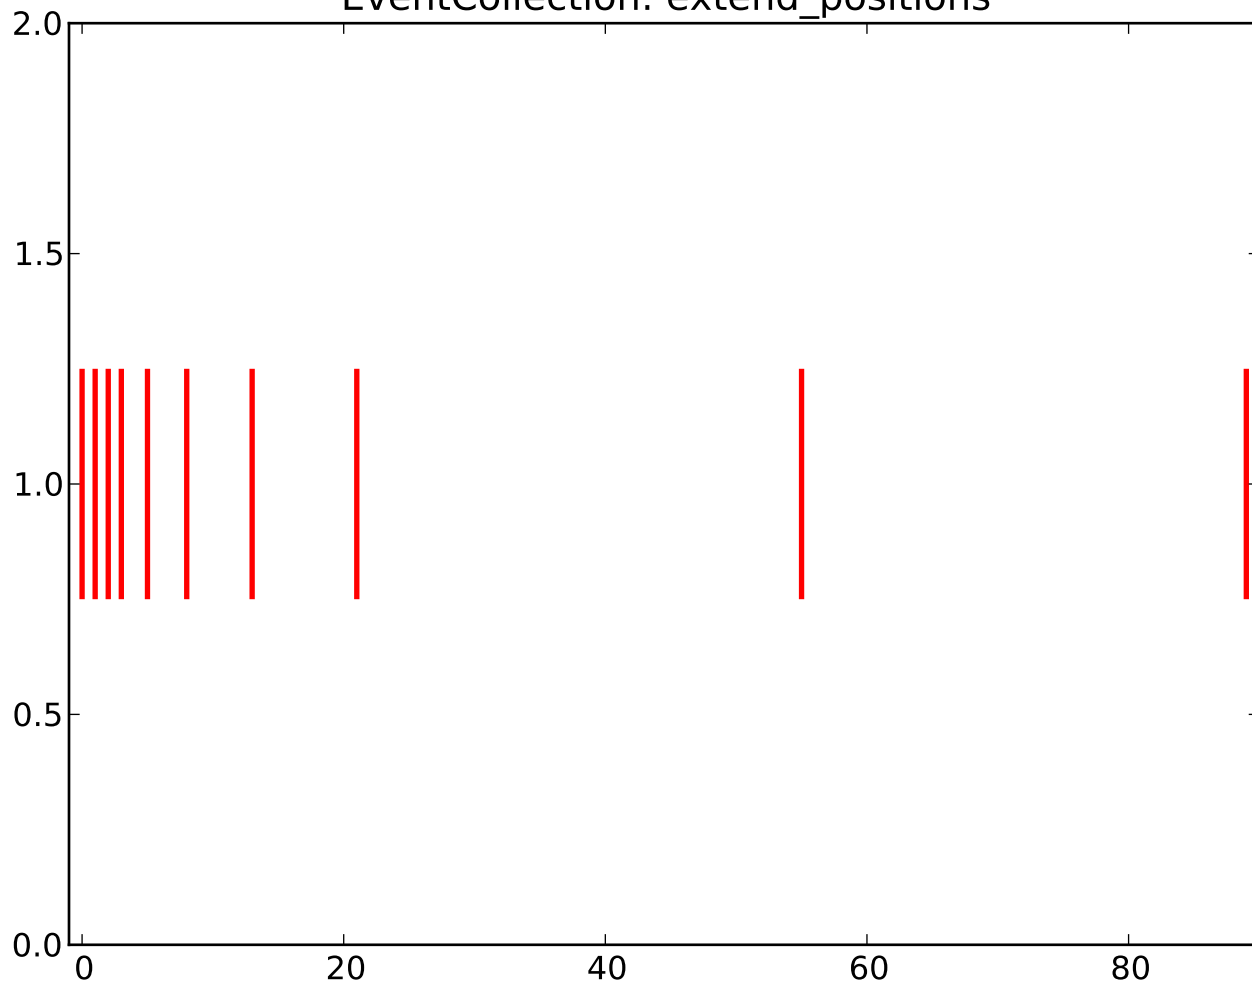

Supplement: Supplementary file 90 [file EventCollection_plot__extend_positions.pdf › Mac OS X/dist/avlog.app/Contents/Resources/lib/python2.7/matplotlib/tests/baseline_images/test_collections/EventCollection_plot__extend_positions.pdf]

EventCollection: set\_color

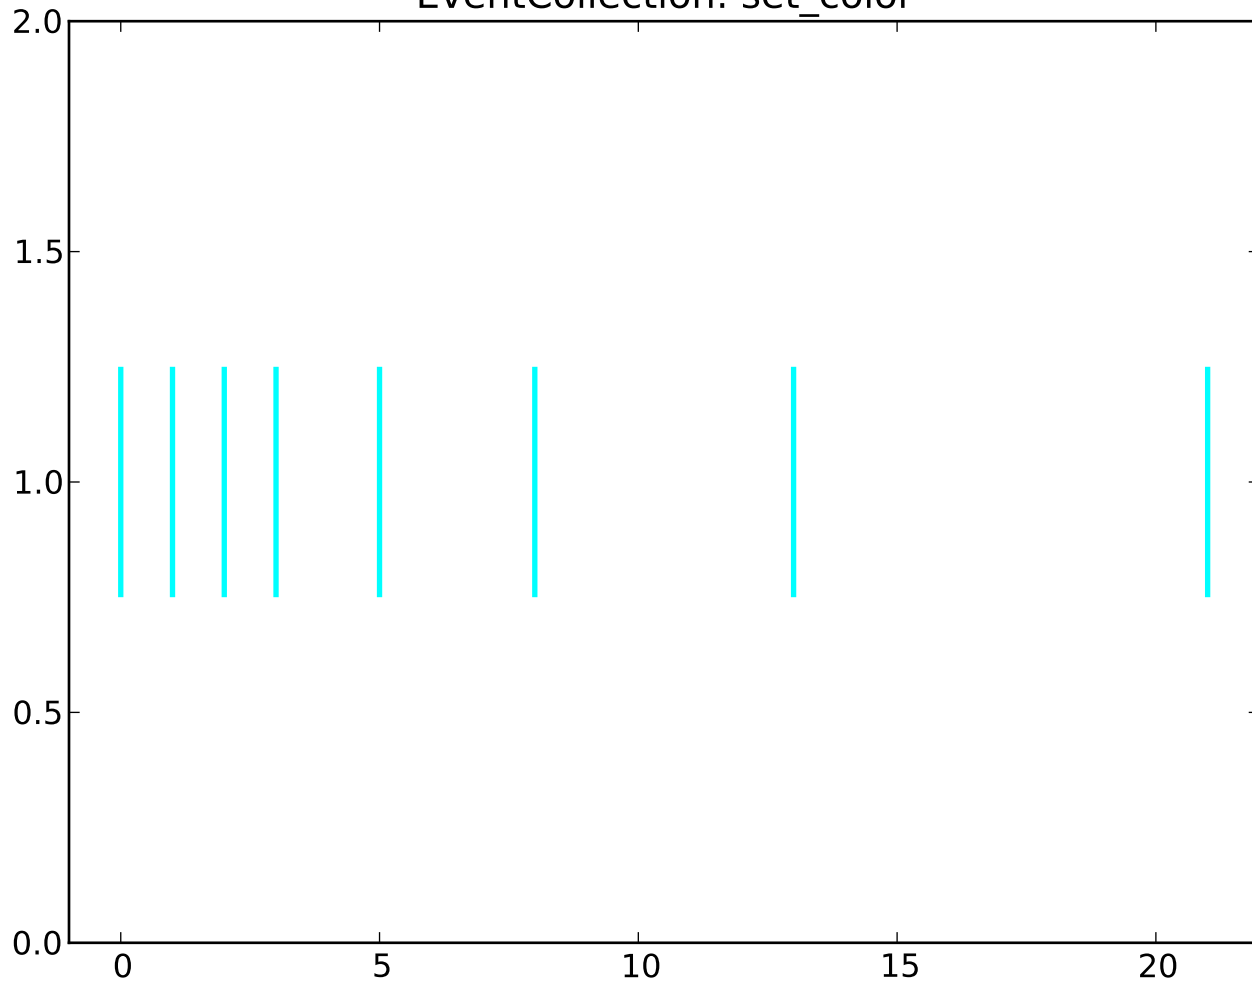

Supplement: Supplementary file 91 [file EventCollection_plot__set_color.pdf › Mac OS X/dist/avlog.app/Contents/Resources/lib/python2.7/matplotlib/tests/baseline_images/test_collections/EventCollection_plot__set_color.pdf]

EventCollection: set\_linelength

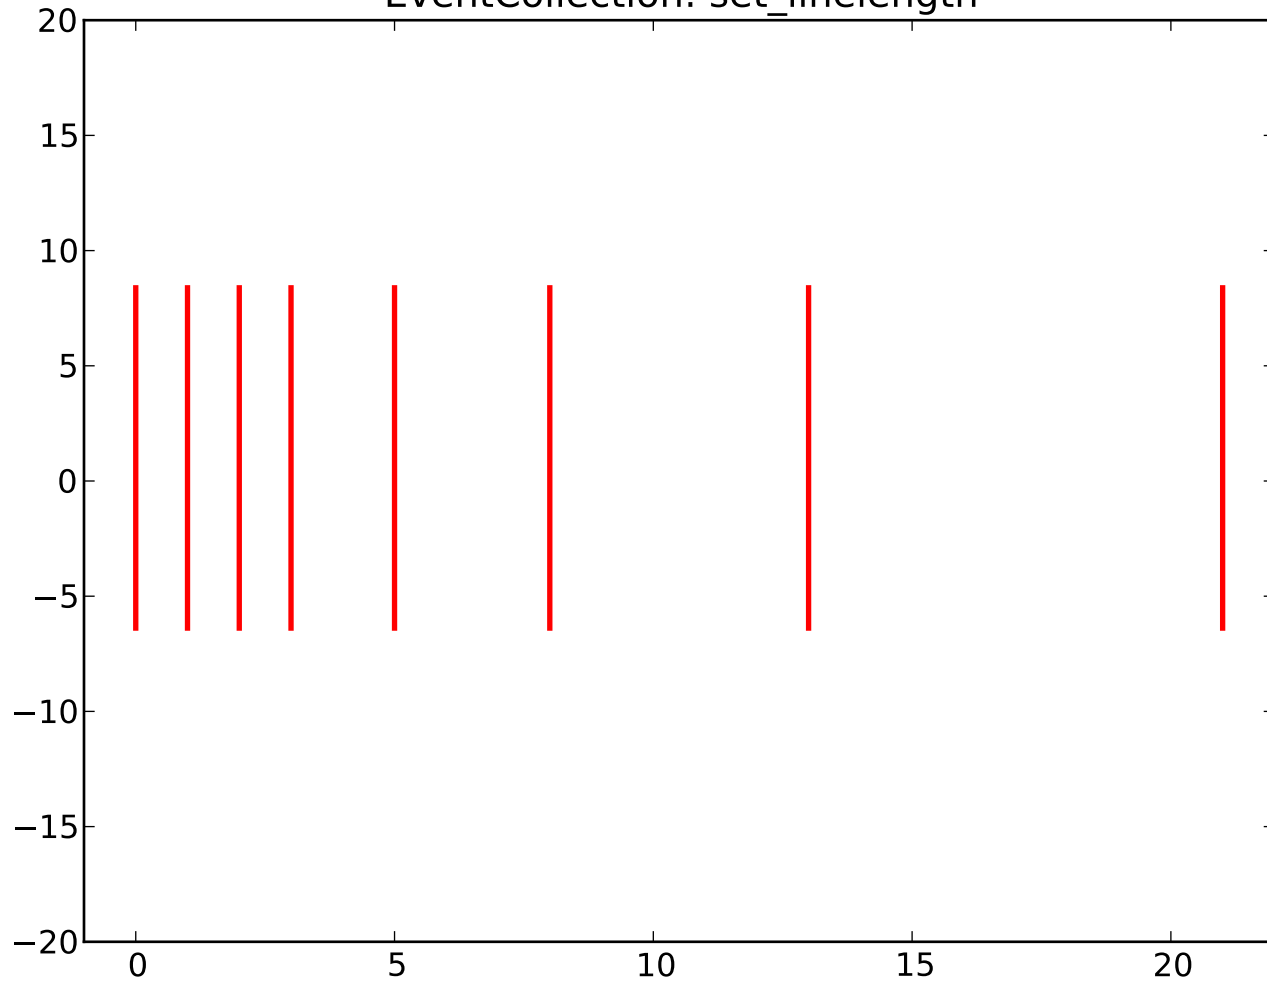

Supplement: Supplementary file 92 [file EventCollection_plot__set_linelength.pdf › Mac OS X/dist/avlog.app/Contents/Resources/lib/python2.7/matplotlib/tests/baseline_images/test_collections/EventCollection_plot__set_linelength.pdf]

EventCollection: set\_lineoffset

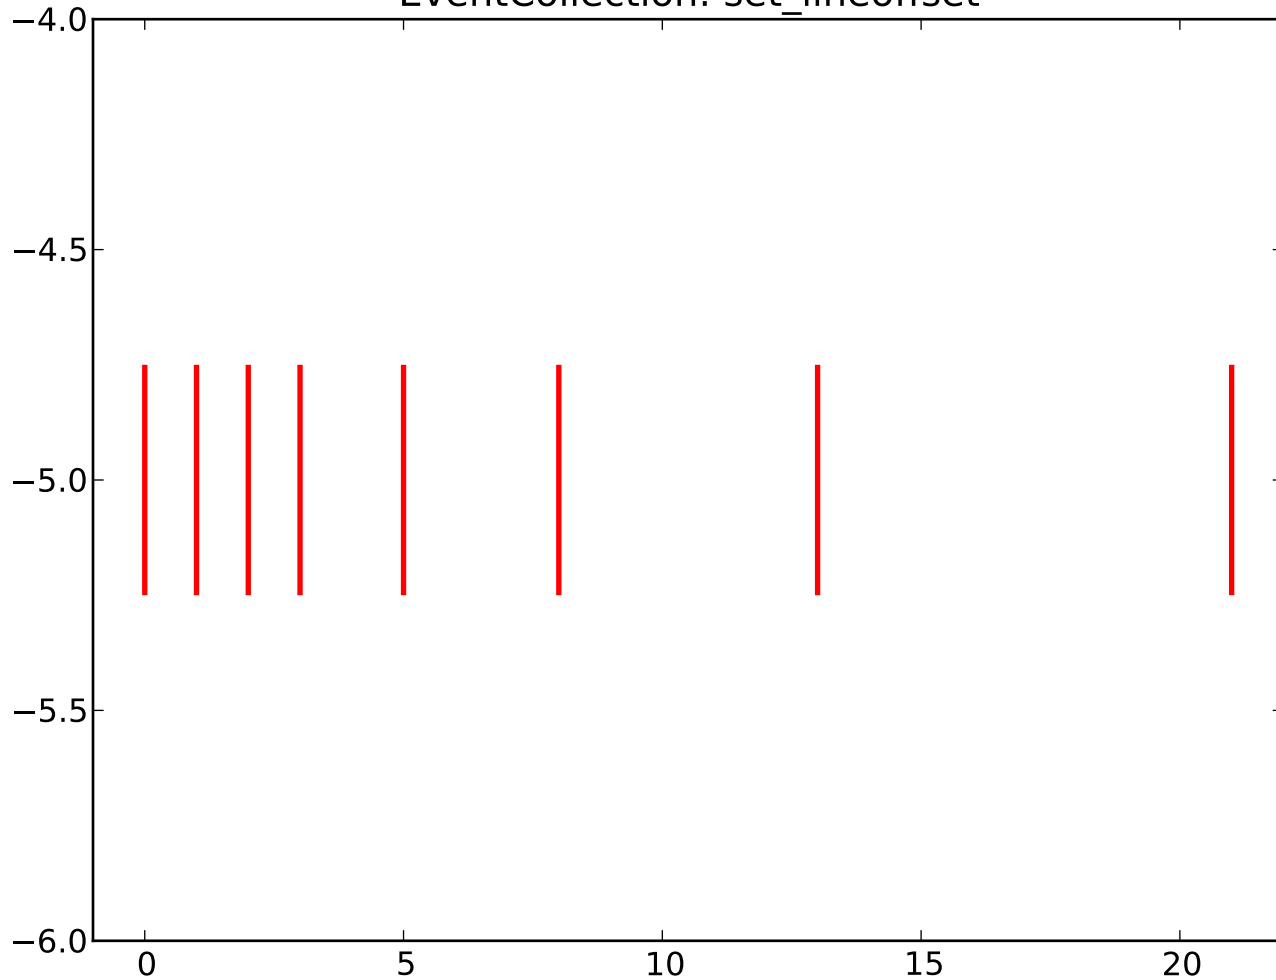

Supplement: Supplementary file 93 [file EventCollection_plot__set_lineoffset.pdf › Mac OS X/dist/avlog.app/Contents/Resources/lib/python2.7/matplotlib/tests/baseline_images/test_collections/EventCollection_plot__set_lineoffset.pdf]

EventCollection: set\_linestyle

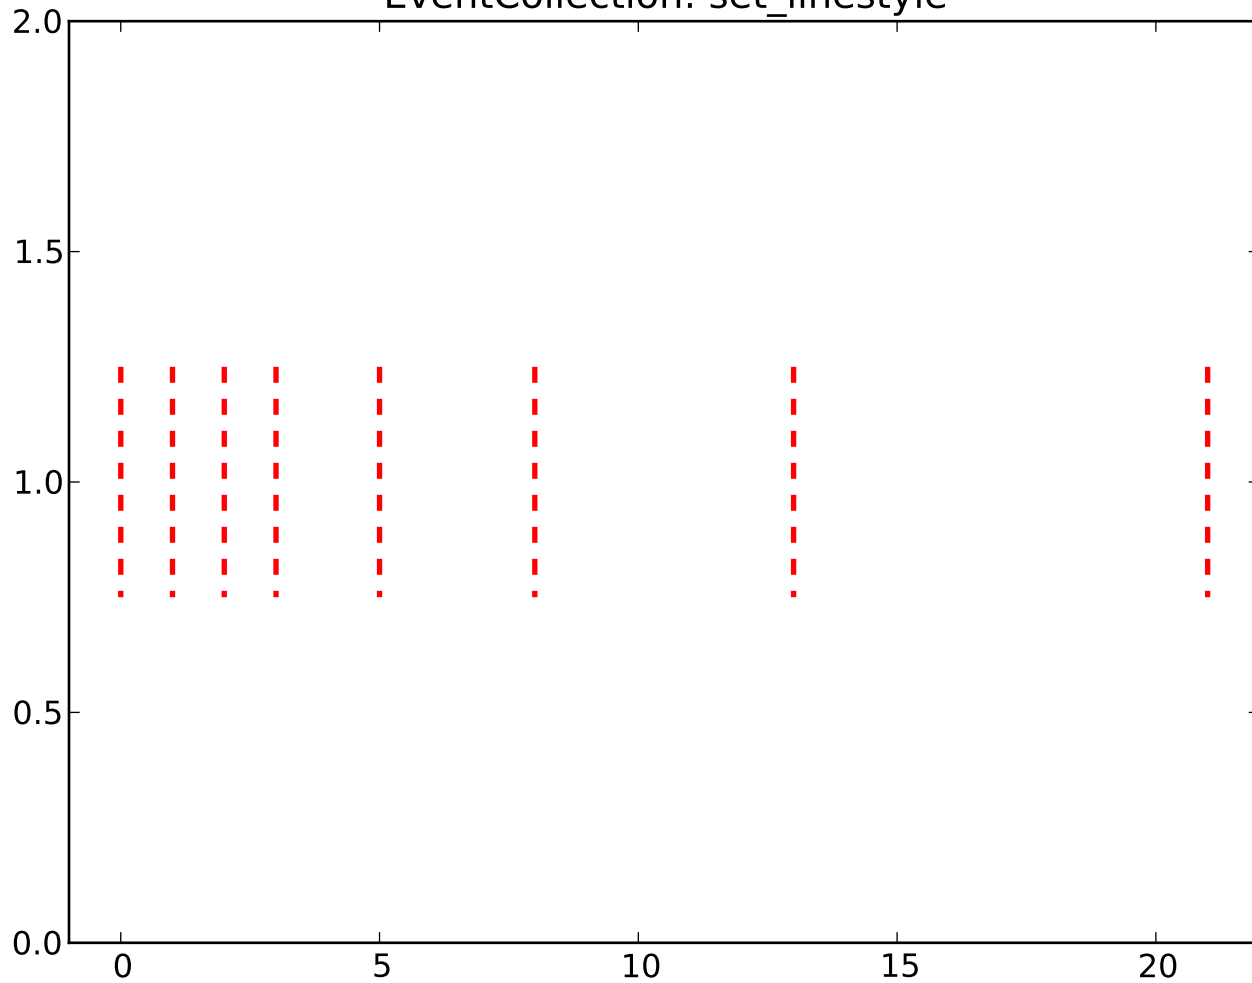

Supplement: Supplementary file 94 [file EventCollection_plot__set_linestyle.pdf › Mac OS X/dist/avlog.app/Contents/Resources/lib/python2.7/matplotlib/tests/baseline_images/test_collections/EventCollection_plot__set_linestyle.pdf]

EventCollection: set\_linewidth

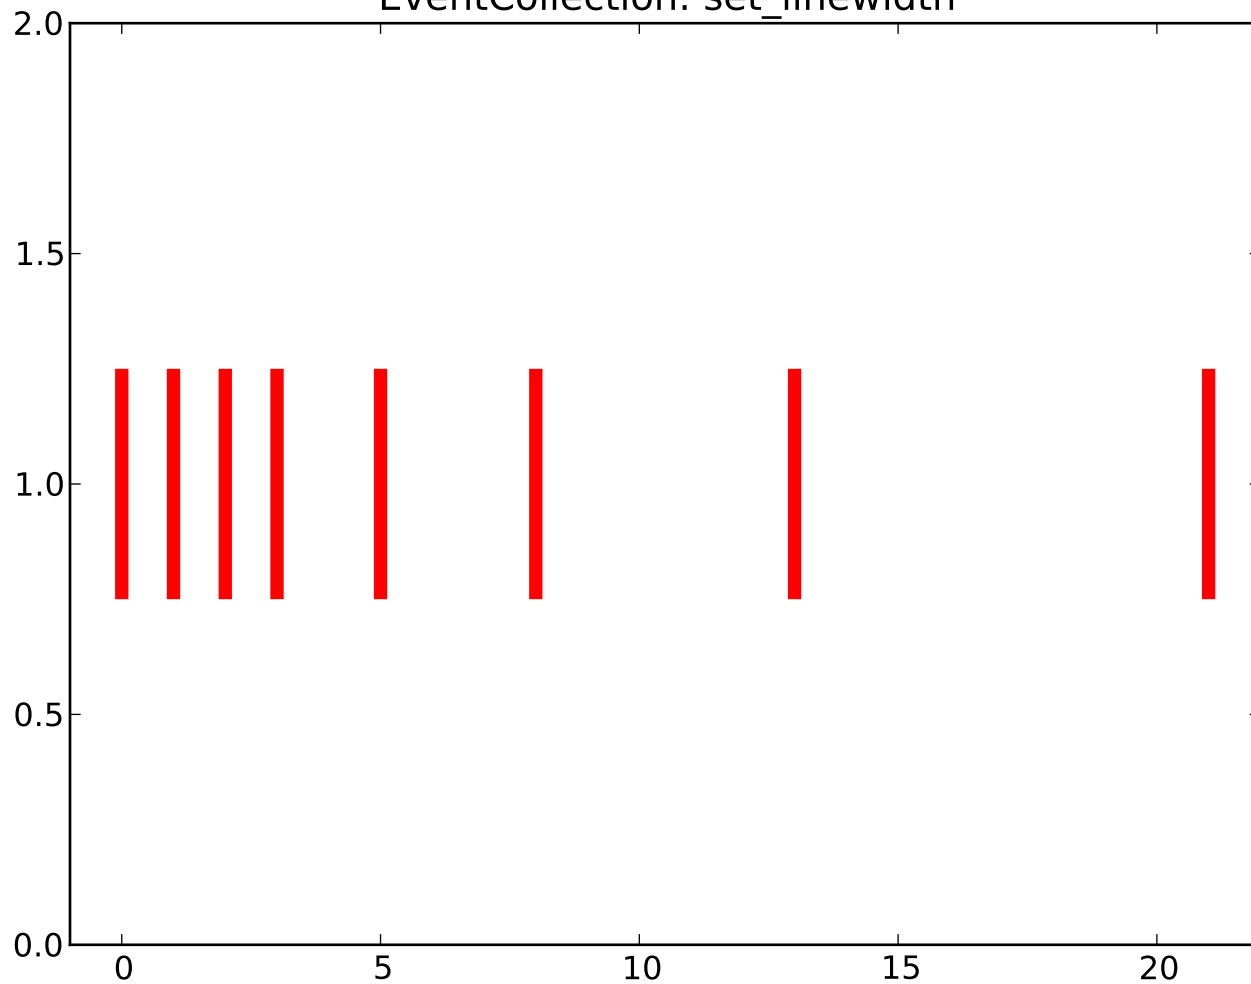

Supplement: Supplementary file 95 [file EventCollection_plot__set_linewidth.pdf › Mac OS X/dist/avlog.app/Contents/Resources/lib/python2.7/matplotlib/tests/baseline_images/test_collections/EventCollection_plot__set_linewidth.pdf]

EventCollection: set\_orientation

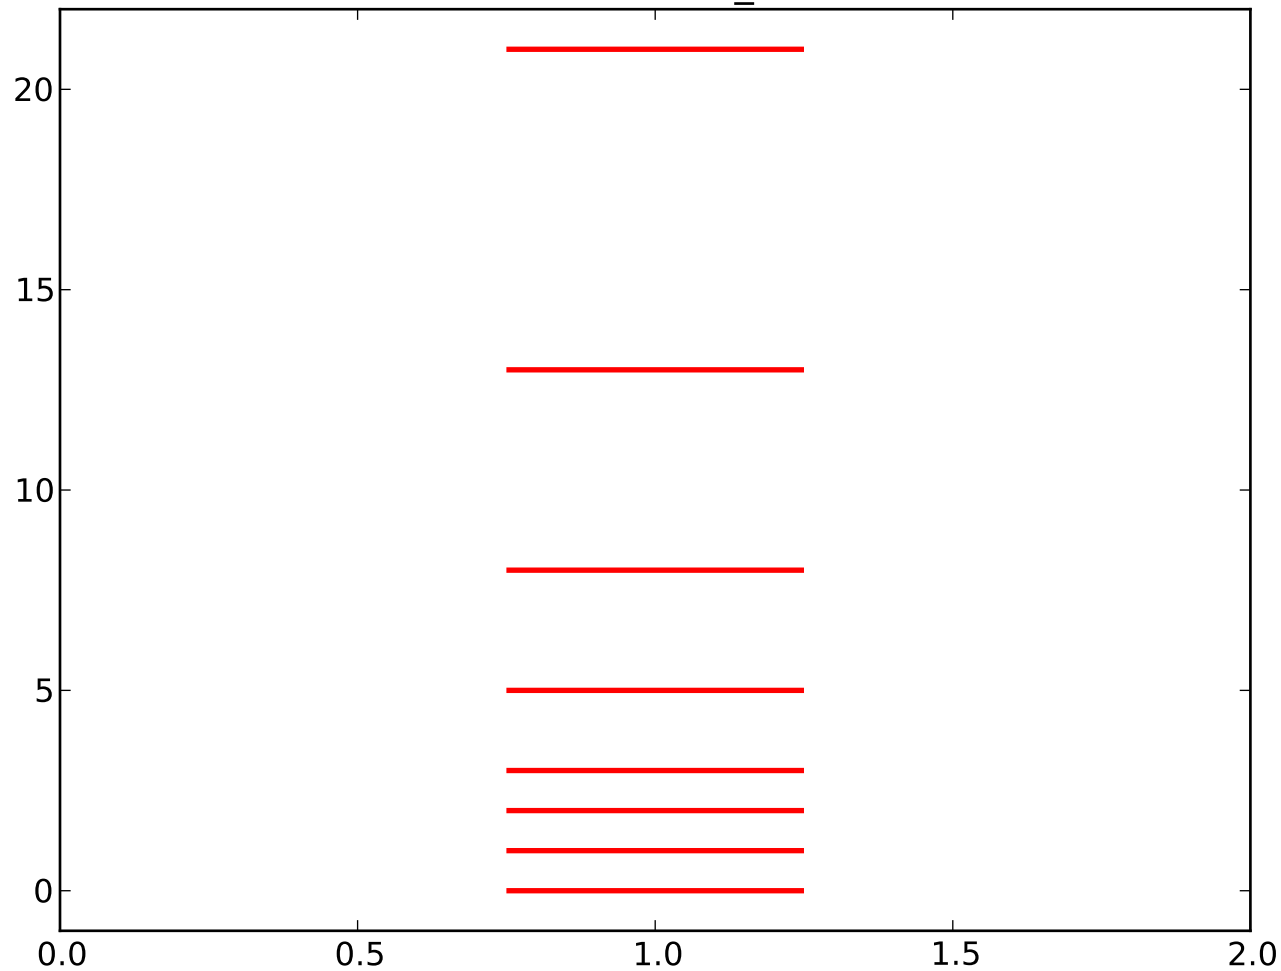

Supplement: Supplementary file 96 [file EventCollection_plot__set_orientation.pdf › Mac OS X/dist/avlog.app/Contents/Resources/lib/python2.7/matplotlib/tests/baseline_images/test_collections/EventCollection_plot__set_orientation.pdf]

EventCollection: set\_positions

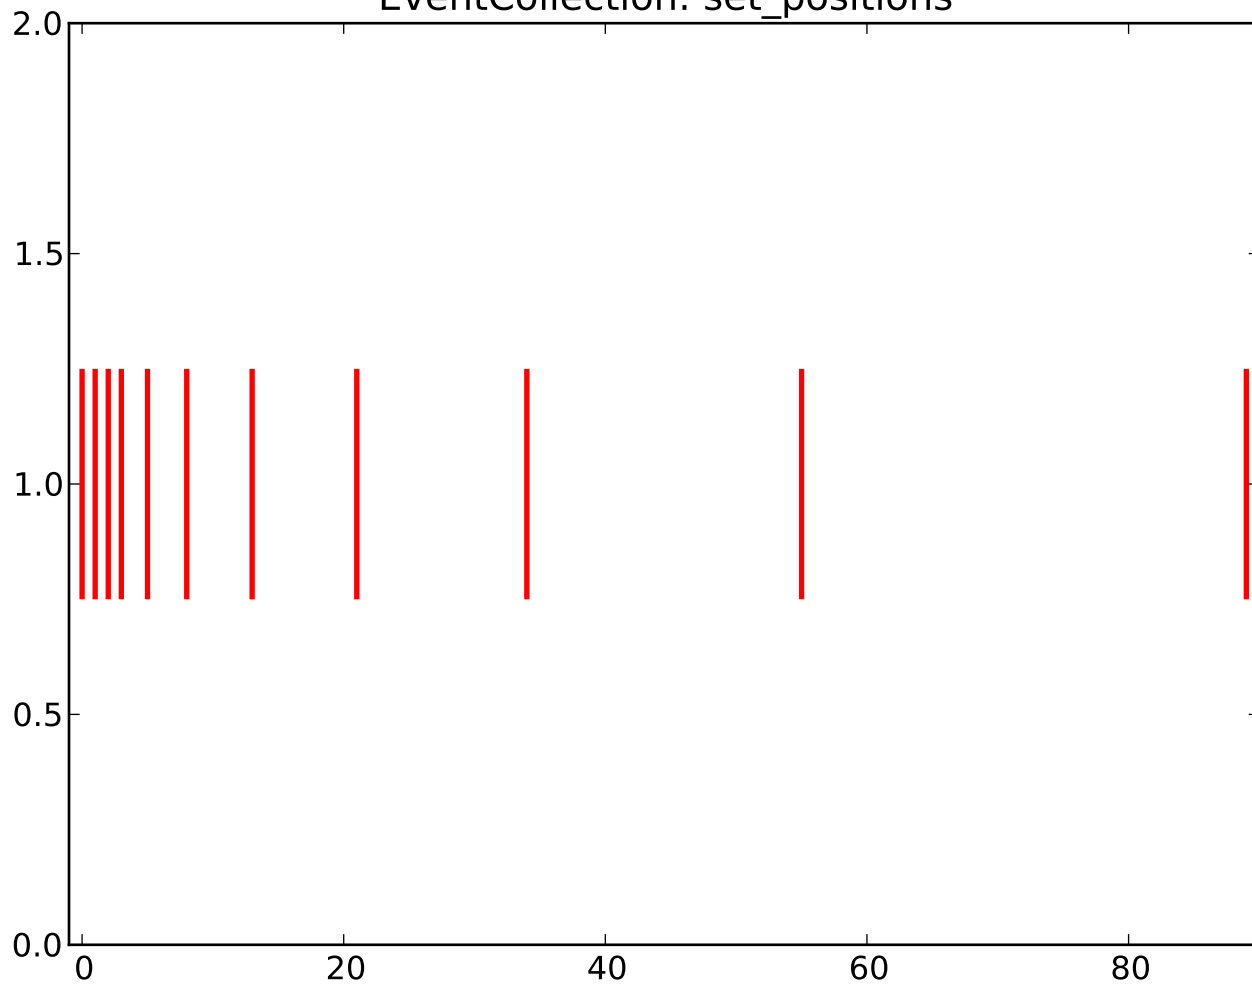

Supplement: Supplementary file 97 [file EventCollection_plot__set_positions.pdf › Mac OS X/dist/avlog.app/Contents/Resources/lib/python2.7/matplotlib/tests/baseline_images/test_collections/EventCollection_plot__set_positions.pdf]

EventCollection: switch\_orientation

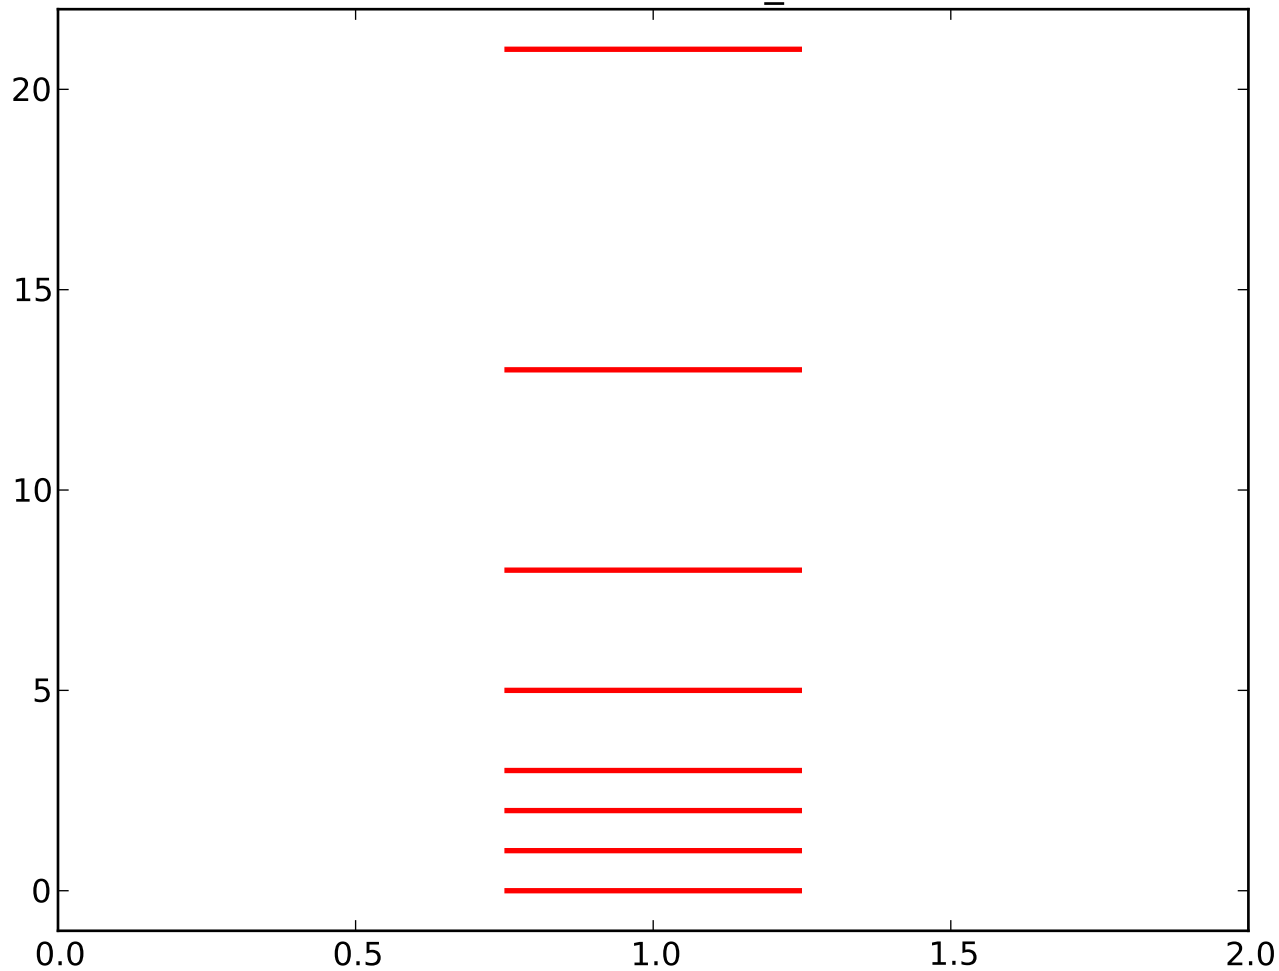

Supplement: Supplementary file 98 [file EventCollection_plot__switch_orientation.pdf › Mac OS X/dist/avlog.app/Contents/Resources/lib/python2.7/matplotlib/tests/baseline_images/test_collections/EventCollection_plot__switch_orientation.pdf]

EventCollection: switch\_orientation 2x

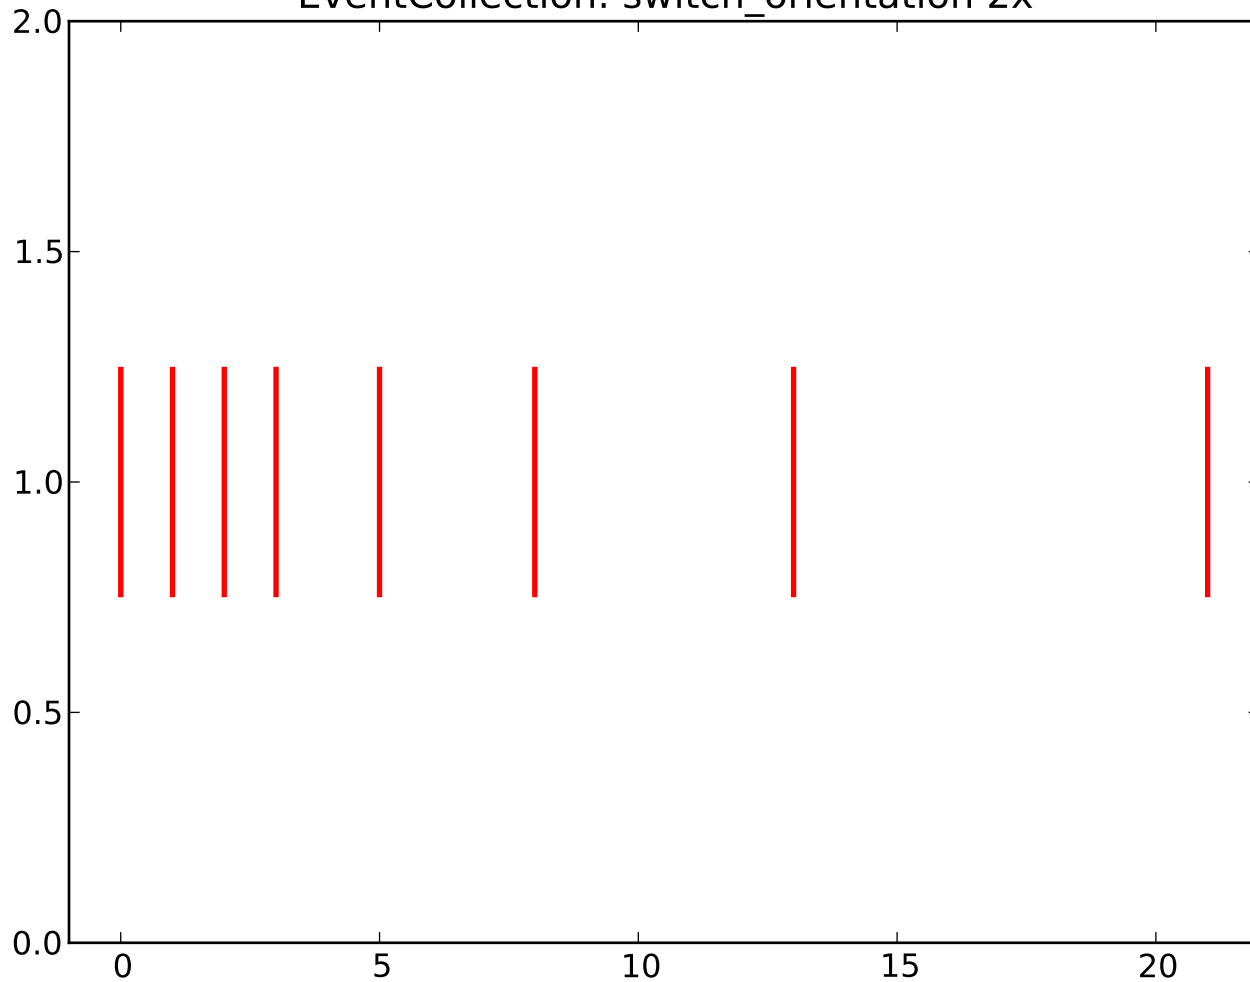

Supplement: Supplementary file 99 [file EventCollection_plot__switch_orientation__2x.pdf › Mac OS X/dist/avlog.app/Contents/Resources/lib/python2.7/matplotlib/tests/baseline_images/test_collections/EventCollection_plot__switch_orientation__2x.pdf]

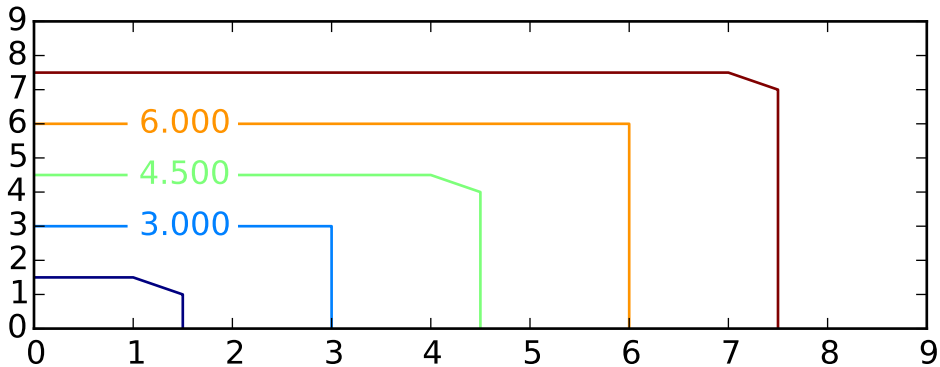

Supplement: Supplementary file 100 [file contour_manual_labels.pdf › Mac OS X/dist/avlog.app/Contents/Resources/lib/python2.7/matplotlib/tests/baseline_images/test_contour/contour_manual_labels.pdf]

title

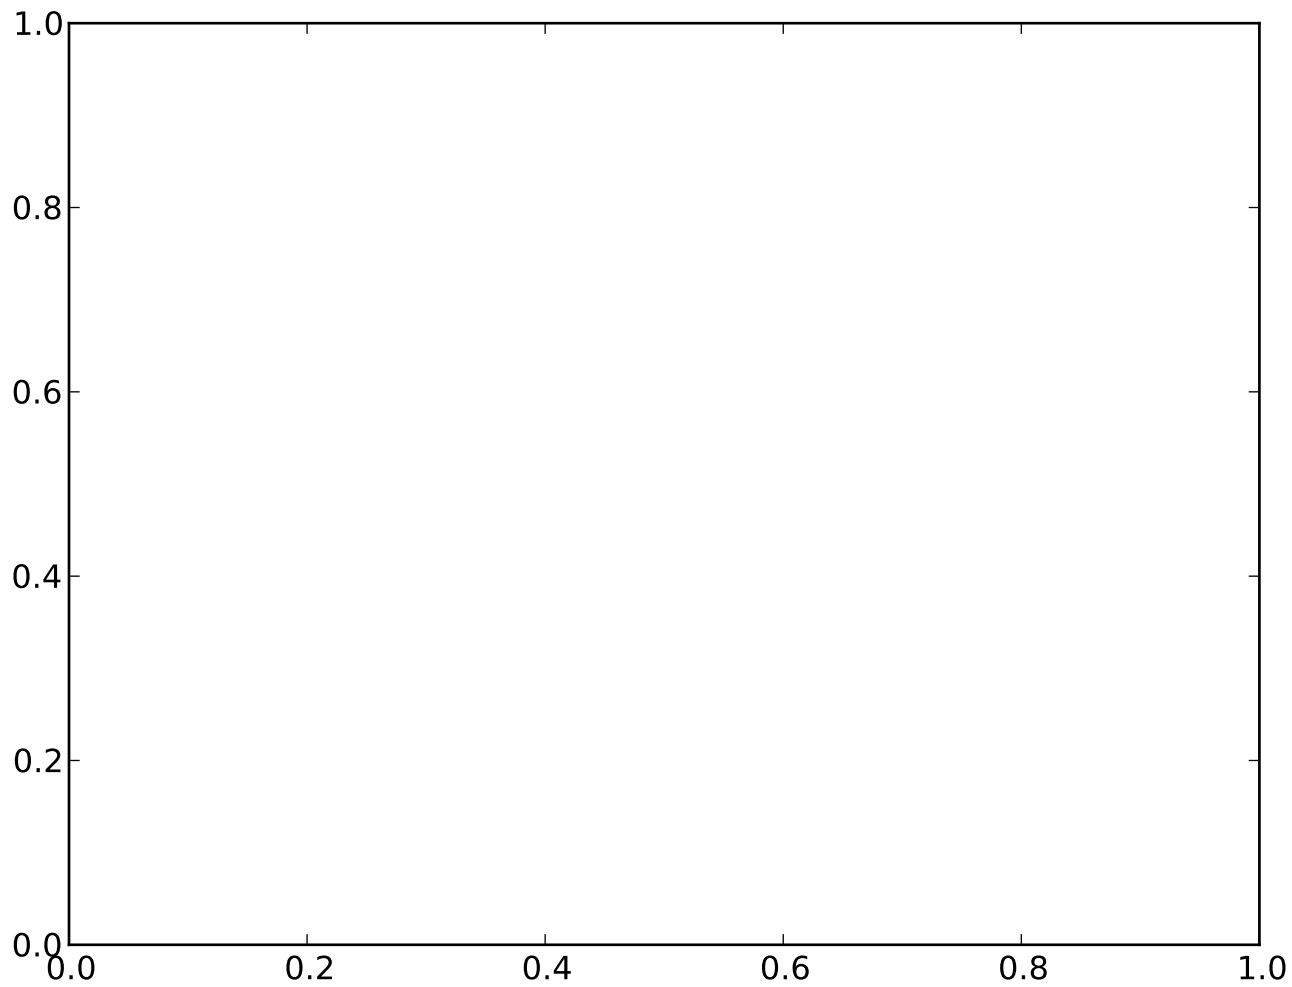

Supplement: Supplementary file 101 [file figure_suptitle.pdf › Mac OS X/dist/avlog.app/Contents/Resources/lib/python2.7/matplotlib/tests/baseline_images/test_figure/figure_suptitle.pdf]

today

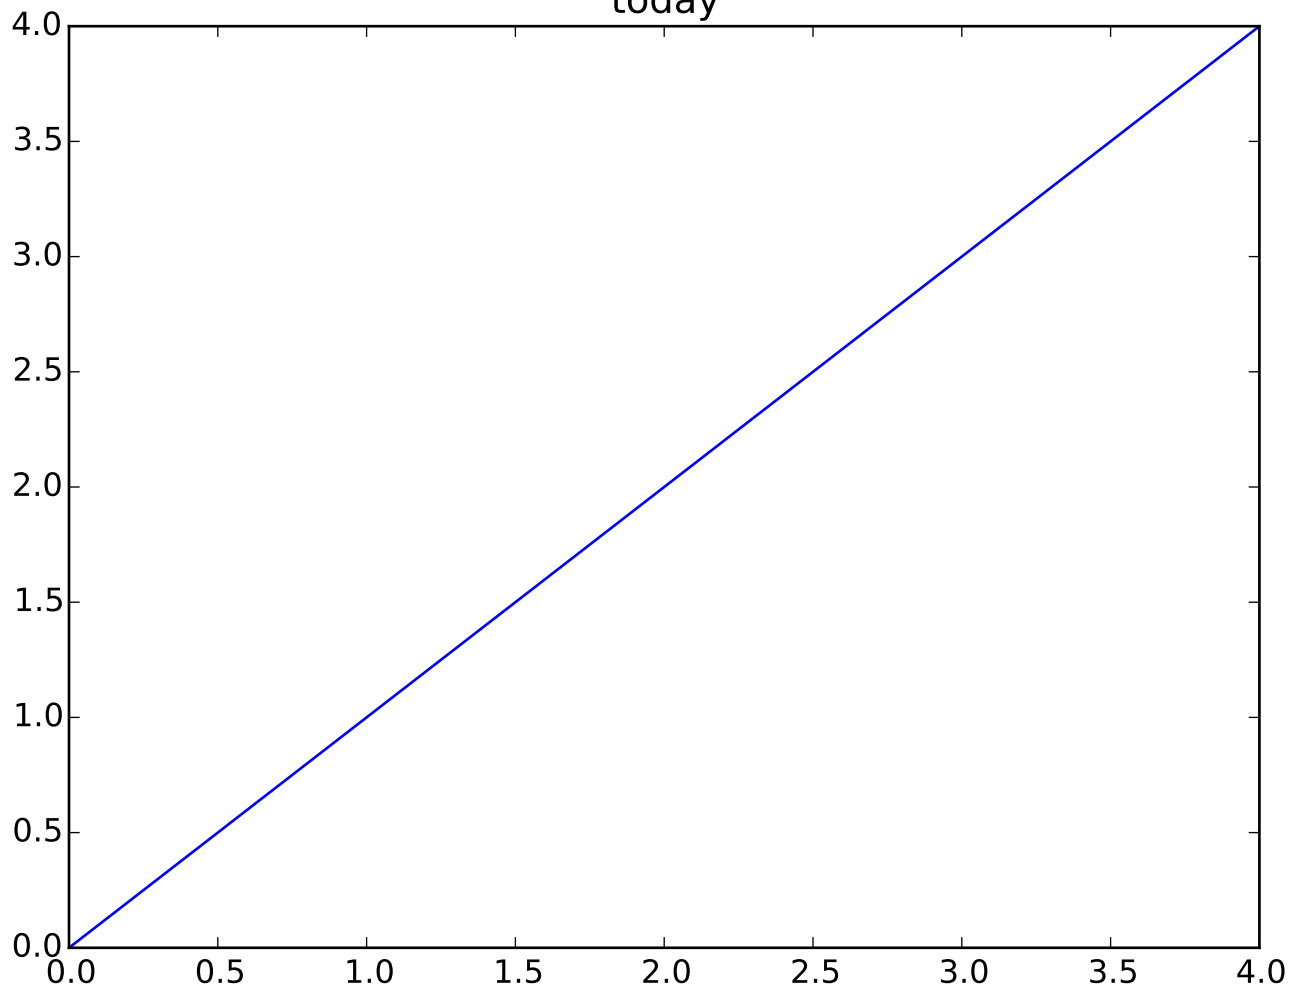

Supplement: Supplementary file 102 [file figure_today.pdf › Mac OS X/dist/avlog.app/Contents/Resources/lib/python2.7/matplotlib/tests/baseline_images/test_figure/figure_today.pdf]
