# Supplementary material (part 2 of 2)
Source: publisher site journal article supplement (https://www.degruyterbrill.com/publication/isbn/9783110413779/downloadAsset/9783110413779_avlog_MacOSX.zip)

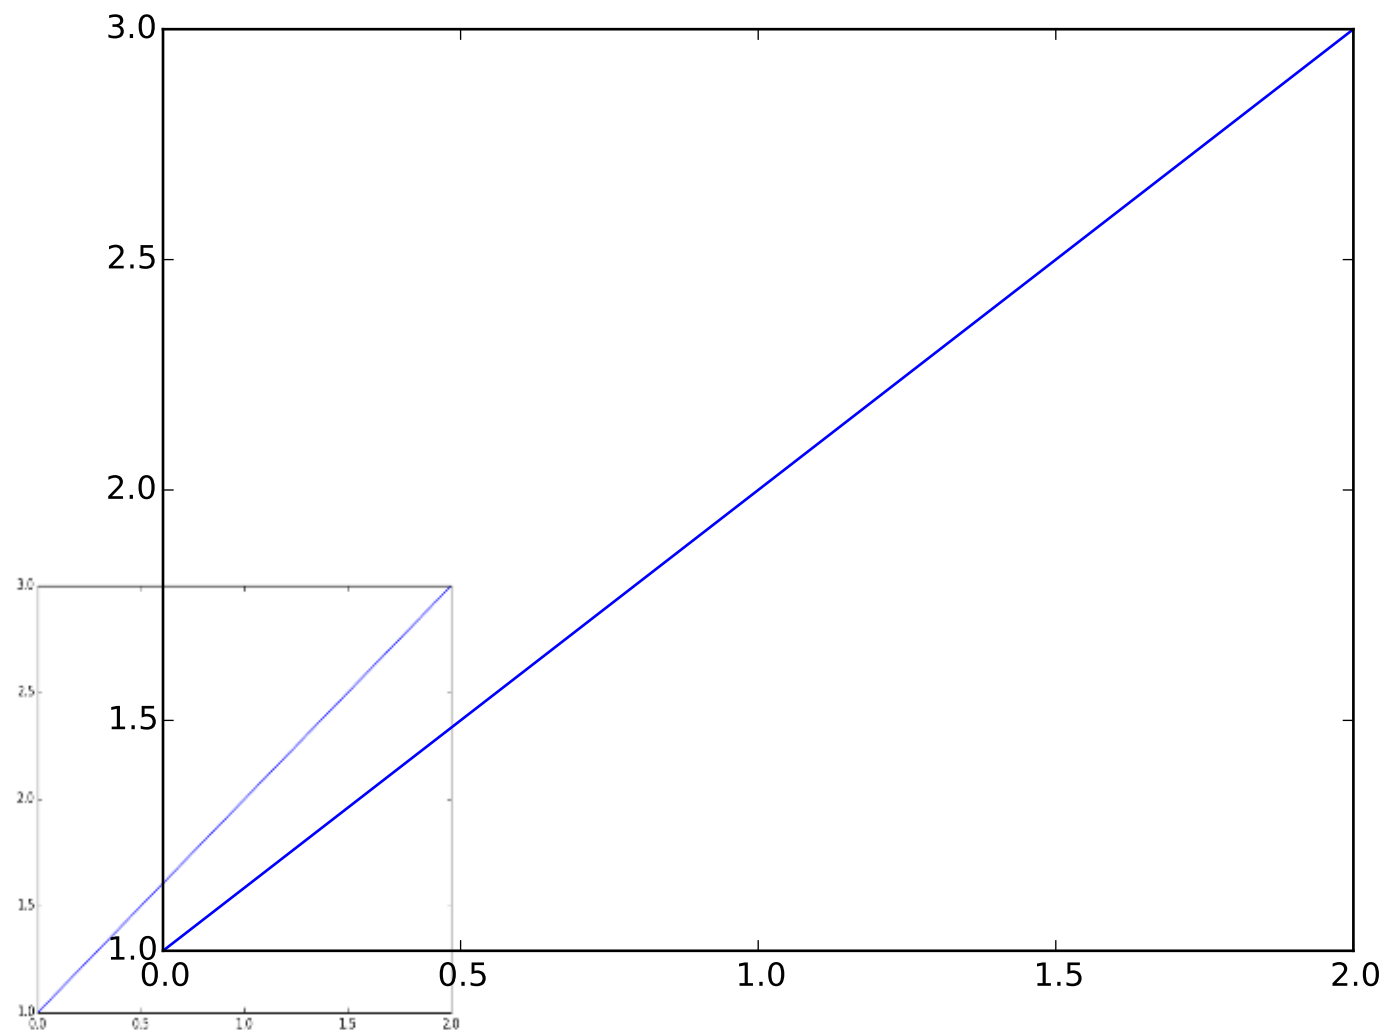

Supplement: Supplementary file 103 [file bbox_image_inverted.pdf › Mac OS X/dist/avlog.app/Contents/Resources/lib/python2.7/matplotlib/tests/baseline_images/test_image/bbox_image_inverted.pdf]

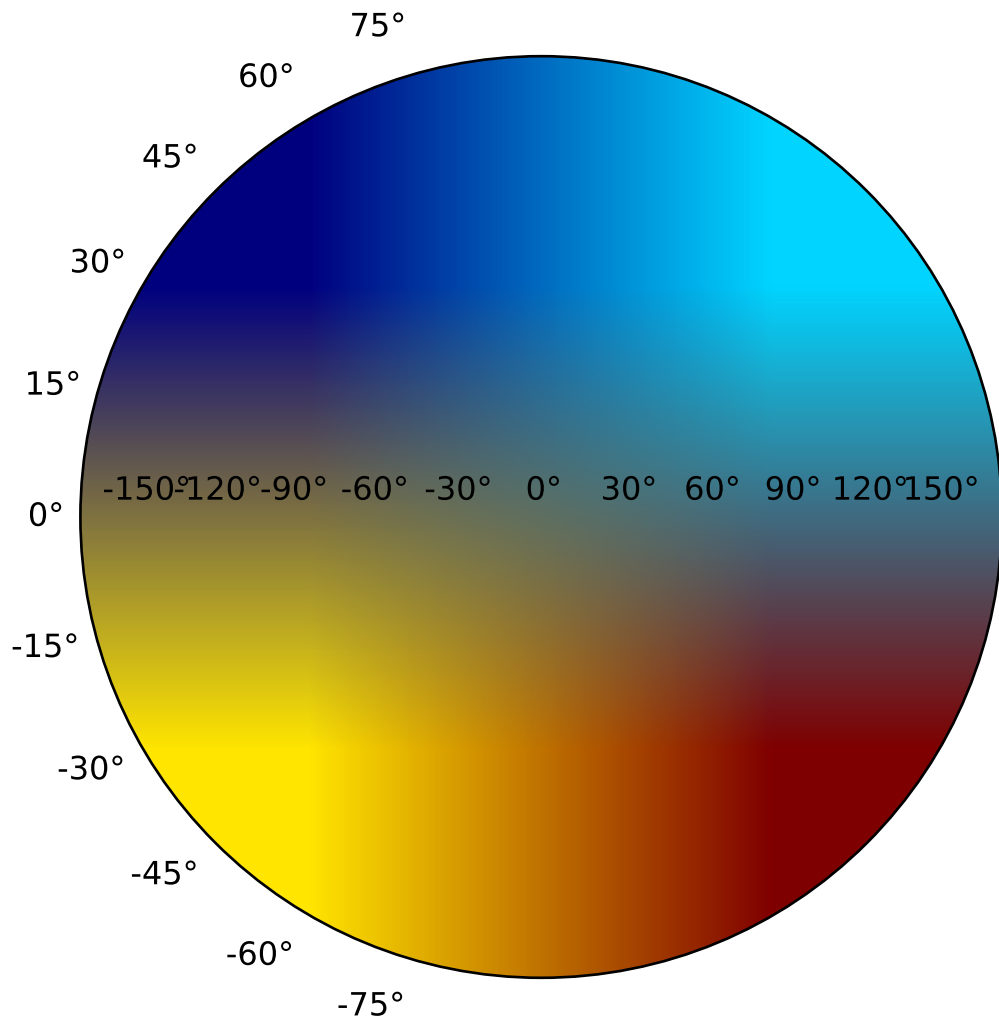

Supplement: Supplementary file 104 [file image_clip.pdf › Mac OS X/dist/avlog.app/Contents/Resources/lib/python2.7/matplotlib/tests/baseline_images/test_image/image_clip.pdf]

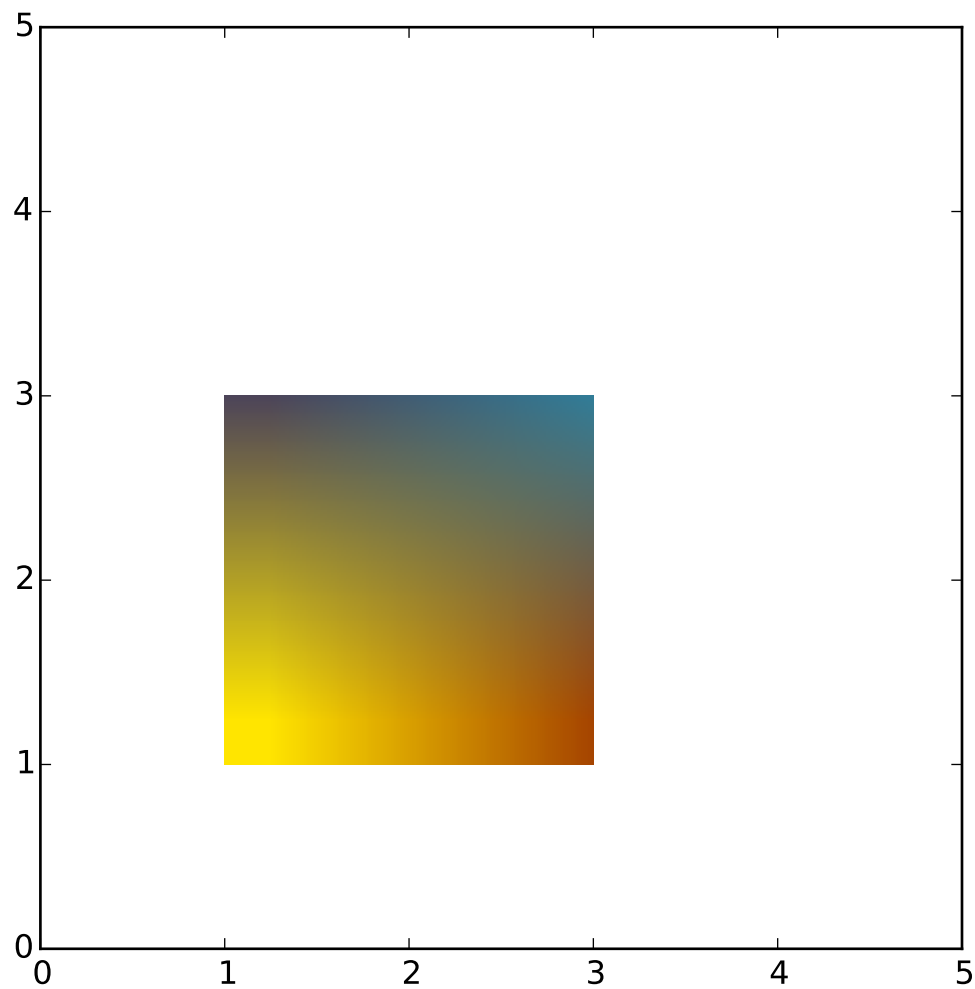

Supplement: Supplementary file 105 [file image_cliprect.pdf › Mac OS X/dist/avlog.app/Contents/Resources/lib/python2.7/matplotlib/tests/baseline_images/test_image/image_cliprect.pdf]

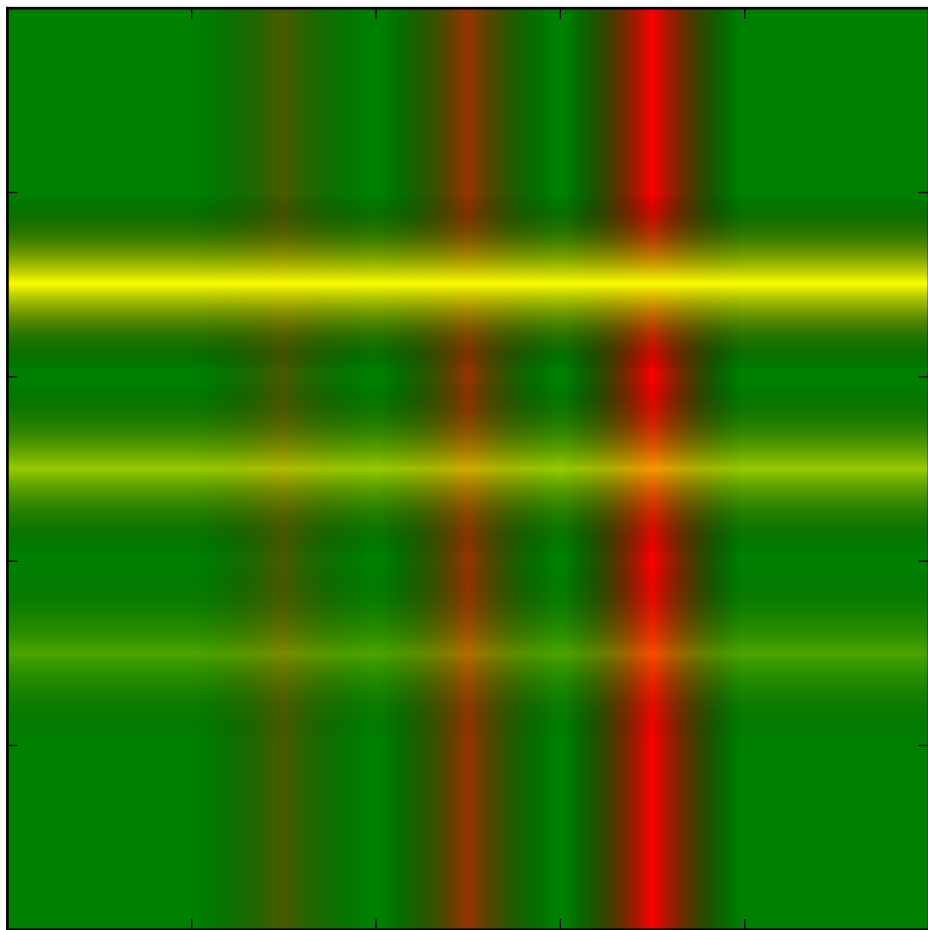

Supplement: Supplementary file 106 [file image_composite_alpha.pdf › Mac OS X/dist/avlog.app/Contents/Resources/lib/python2.7/matplotlib/tests/baseline_images/test_image/image_composite_alpha.pdf]

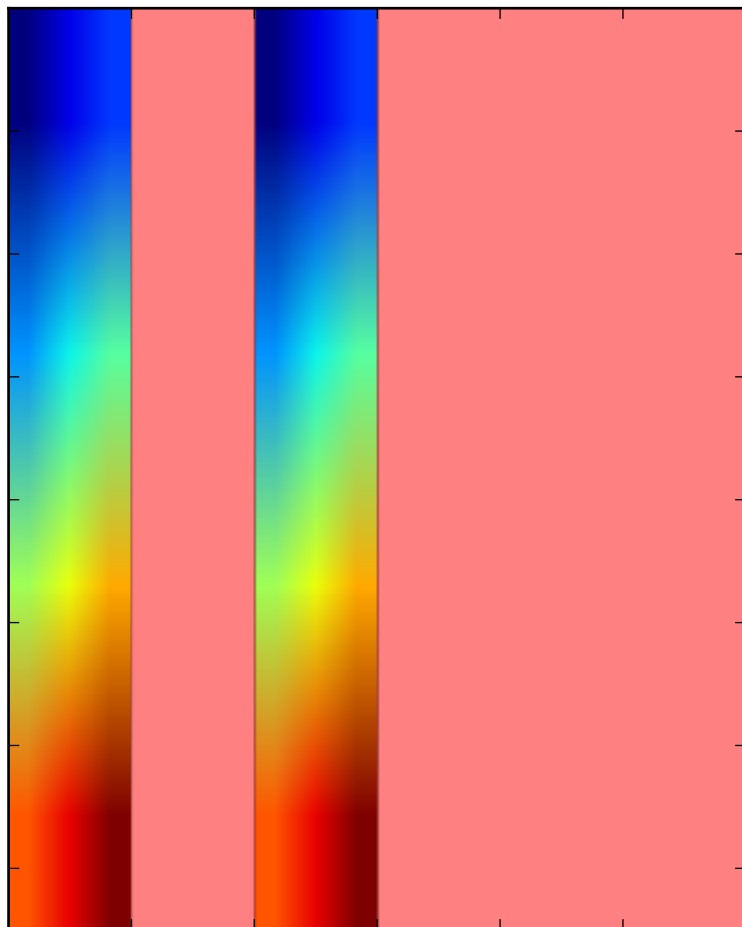

Supplement: Supplementary file 107 [file image_composite_background.pdf › Mac OS X/dist/avlog.app/Contents/Resources/lib/python2.7/matplotlib/tests/baseline_images/test_image/image_composite_background.pdf]

three interpolations

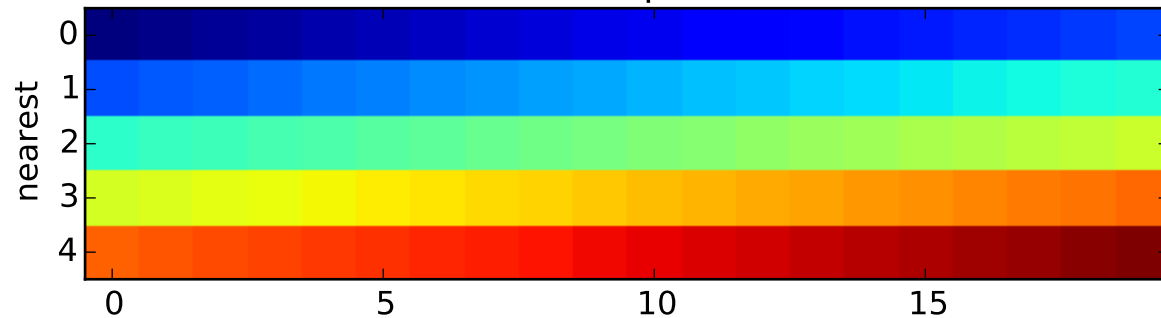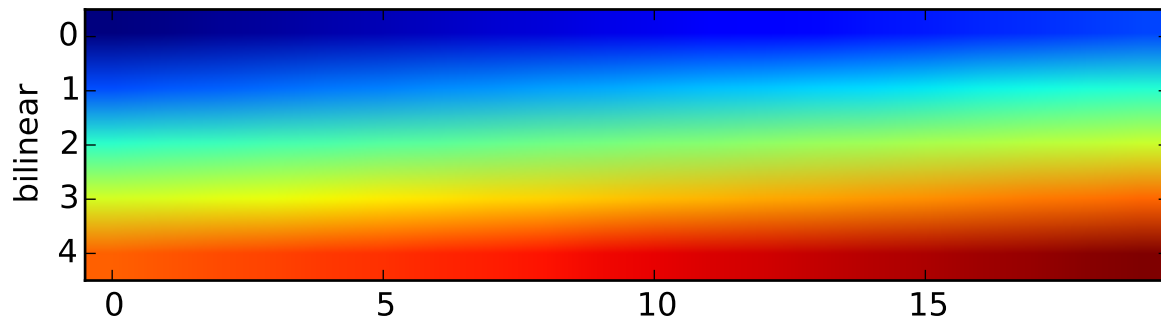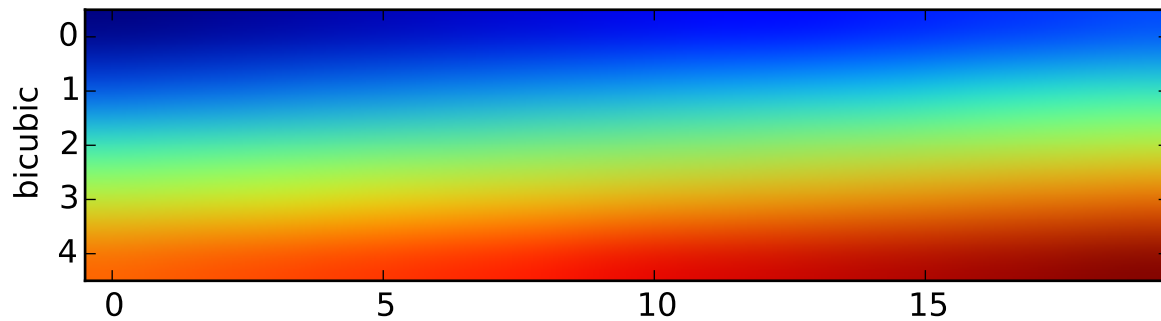

Supplement: Supplementary file 108 [file image_interps.pdf › Mac OS X/dist/avlog.app/Contents/Resources/lib/python2.7/matplotlib/tests/baseline_images/test_image/image_interps.pdf]

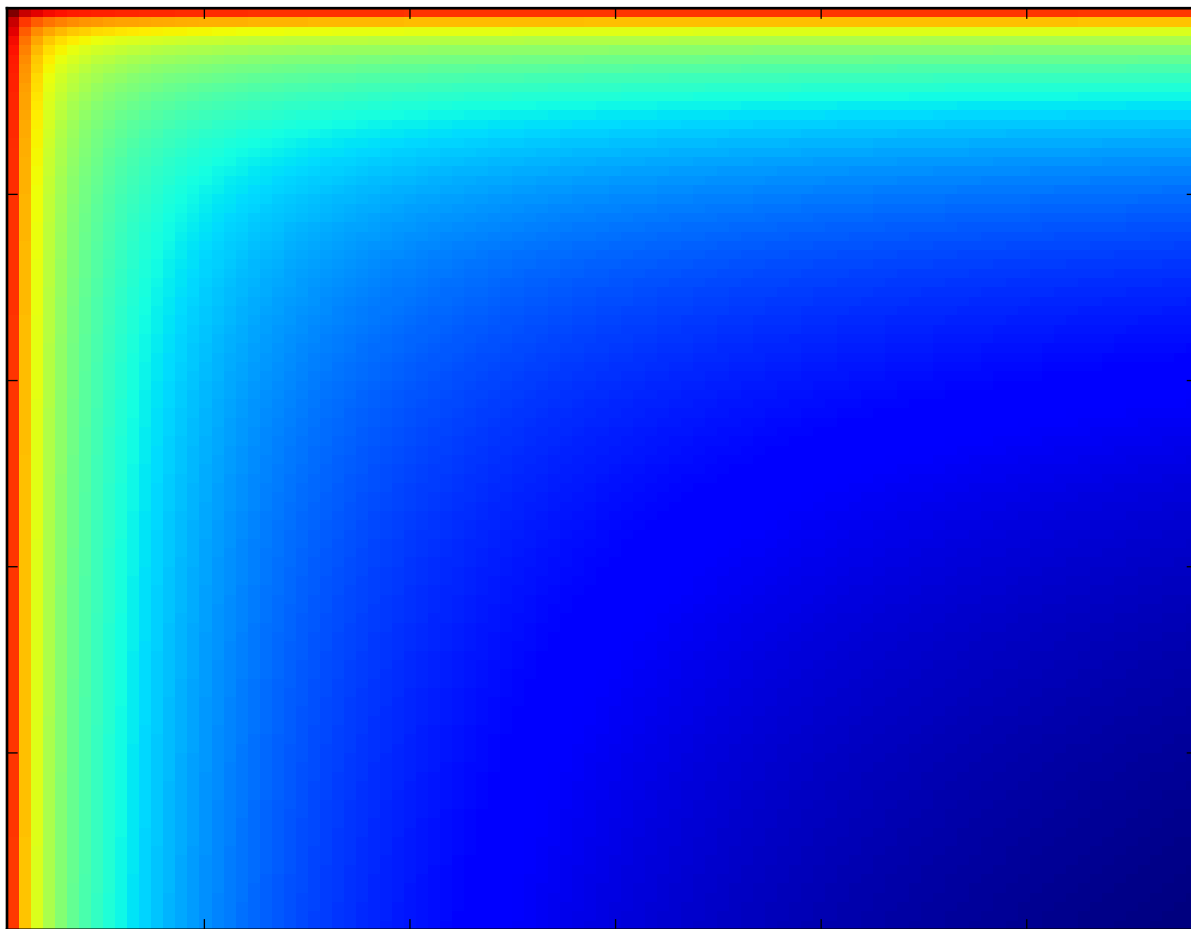

Supplement: Supplementary file 109 [file image_shift.pdf › Mac OS X/dist/avlog.app/Contents/Resources/lib/python2.7/matplotlib/tests/baseline_images/test_image/image_shift.pdf]

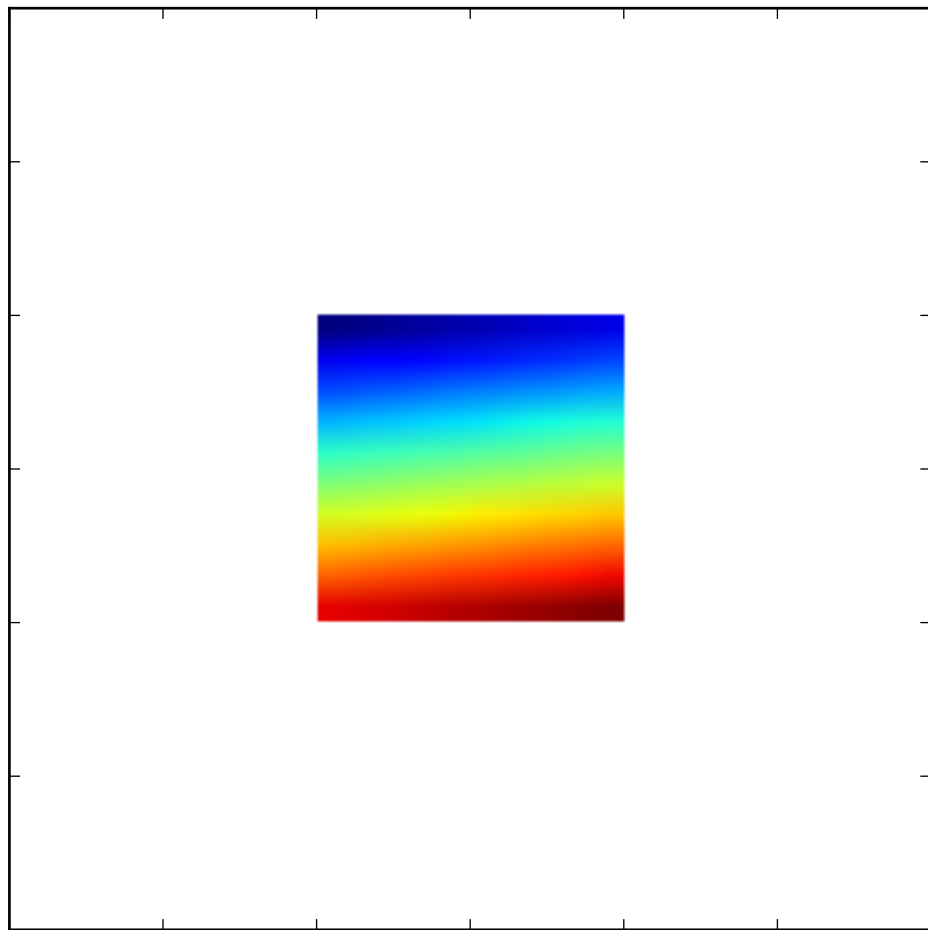

Supplement: Supplementary file 110 [file imshow.pdf › Mac OS X/dist/avlog.app/Contents/Resources/lib/python2.7/matplotlib/tests/baseline_images/test_image/imshow.pdf]

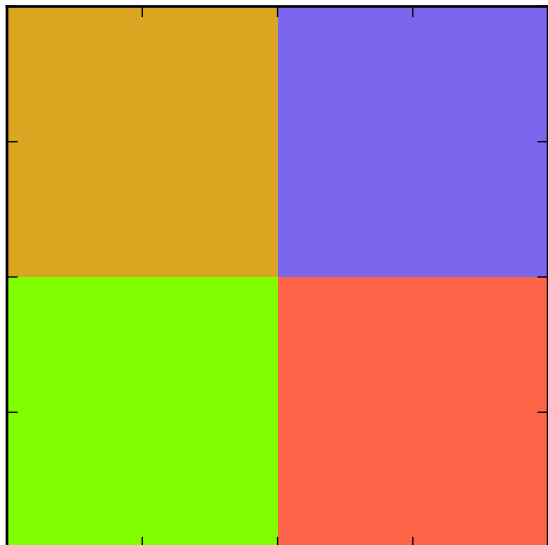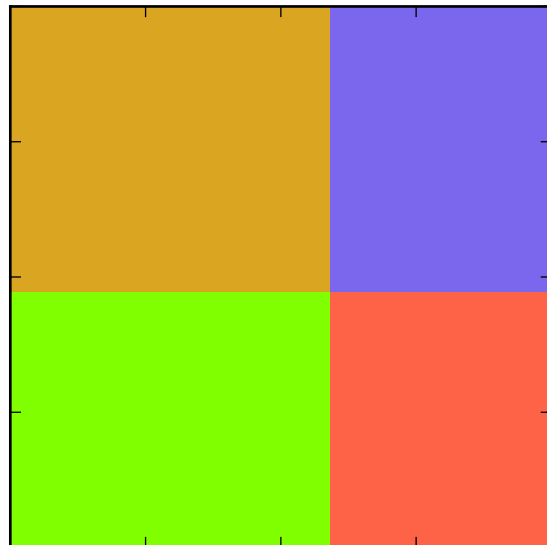

Supplement: Supplementary file 111 [file interp_nearest_vs_none.pdf › Mac OS X/dist/avlog.app/Contents/Resources/lib/python2.7/matplotlib/tests/baseline_images/test_image/interp_nearest_vs_none.pdf]

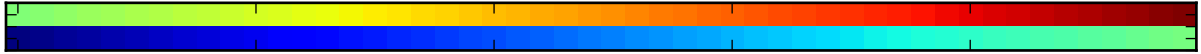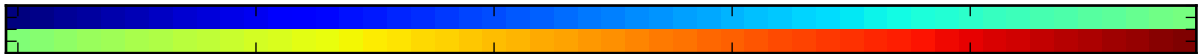

Supplement: Supplementary file 112 [file no_interpolation_origin.pdf › Mac OS X/dist/avlog.app/Contents/Resources/lib/python2.7/matplotlib/tests/baseline_images/test_image/no_interpolation_origin.pdf]

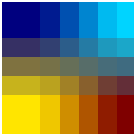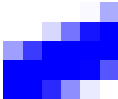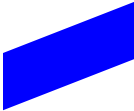

Supplement: Supplementary file 113 [file rasterize_10dpi.pdf › Mac OS X/dist/avlog.app/Contents/Resources/lib/python2.7/matplotlib/tests/baseline_images/test_image/rasterize_10dpi.pdf]

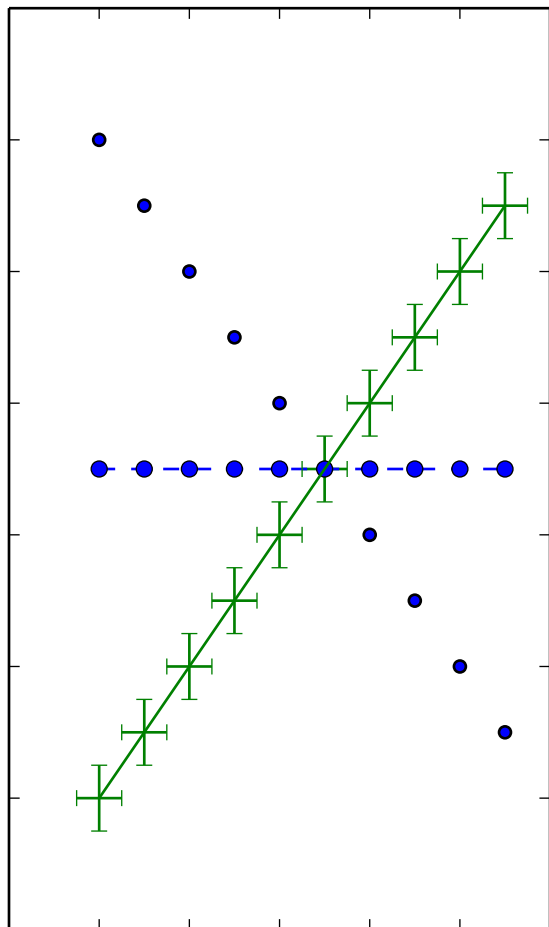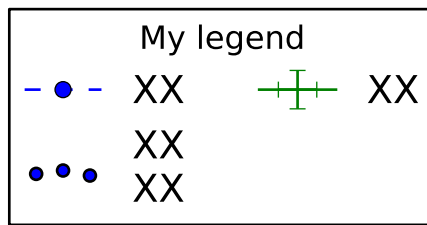

Supplement: Supplementary file 114 [file fancy.pdf › Mac OS X/dist/avlog.app/Contents/Resources/lib/python2.7/matplotlib/tests/baseline_images/test_legend/fancy.pdf]

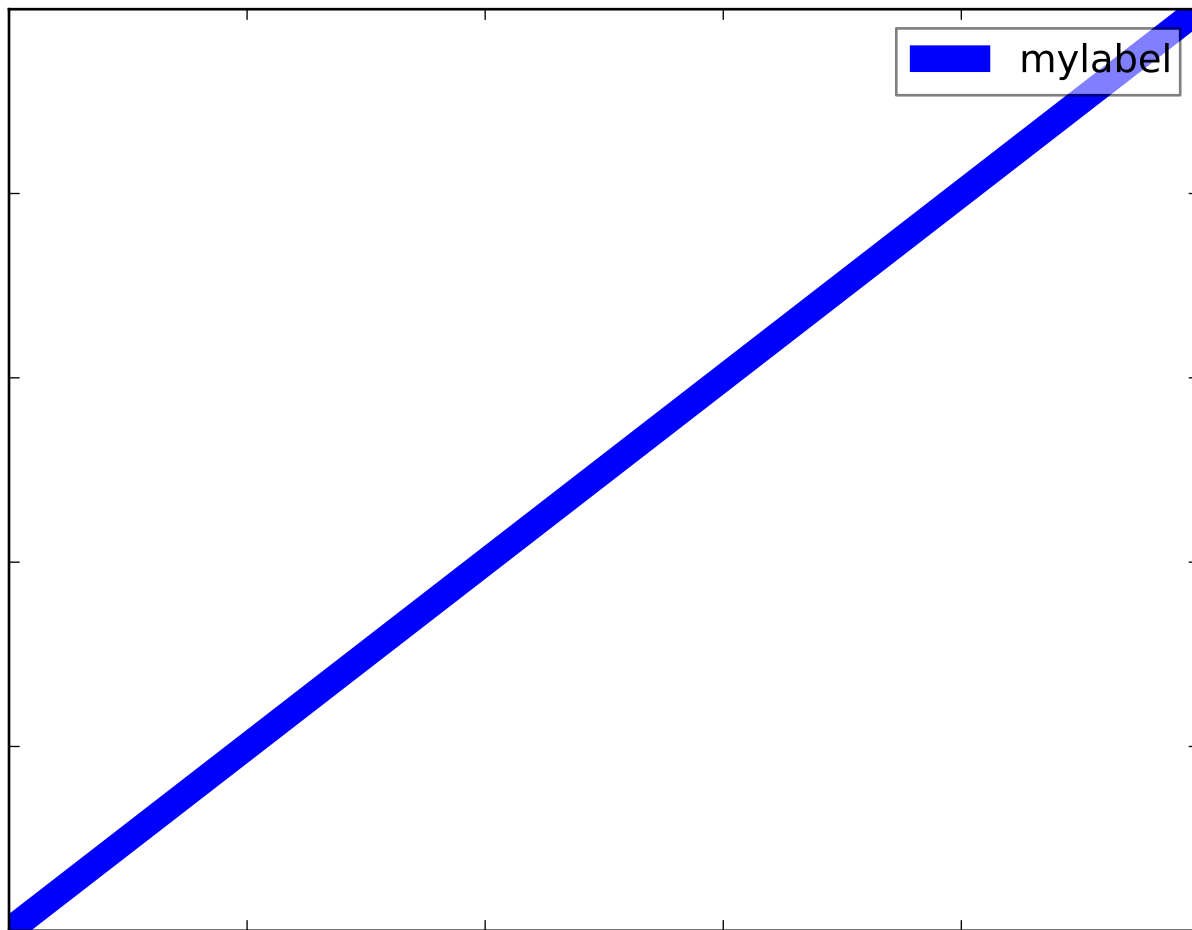

Supplement: Supplementary file 115 [file framealpha.pdf › Mac OS X/dist/avlog.app/Contents/Resources/lib/python2.7/matplotlib/tests/baseline_images/test_legend/framealpha.pdf]

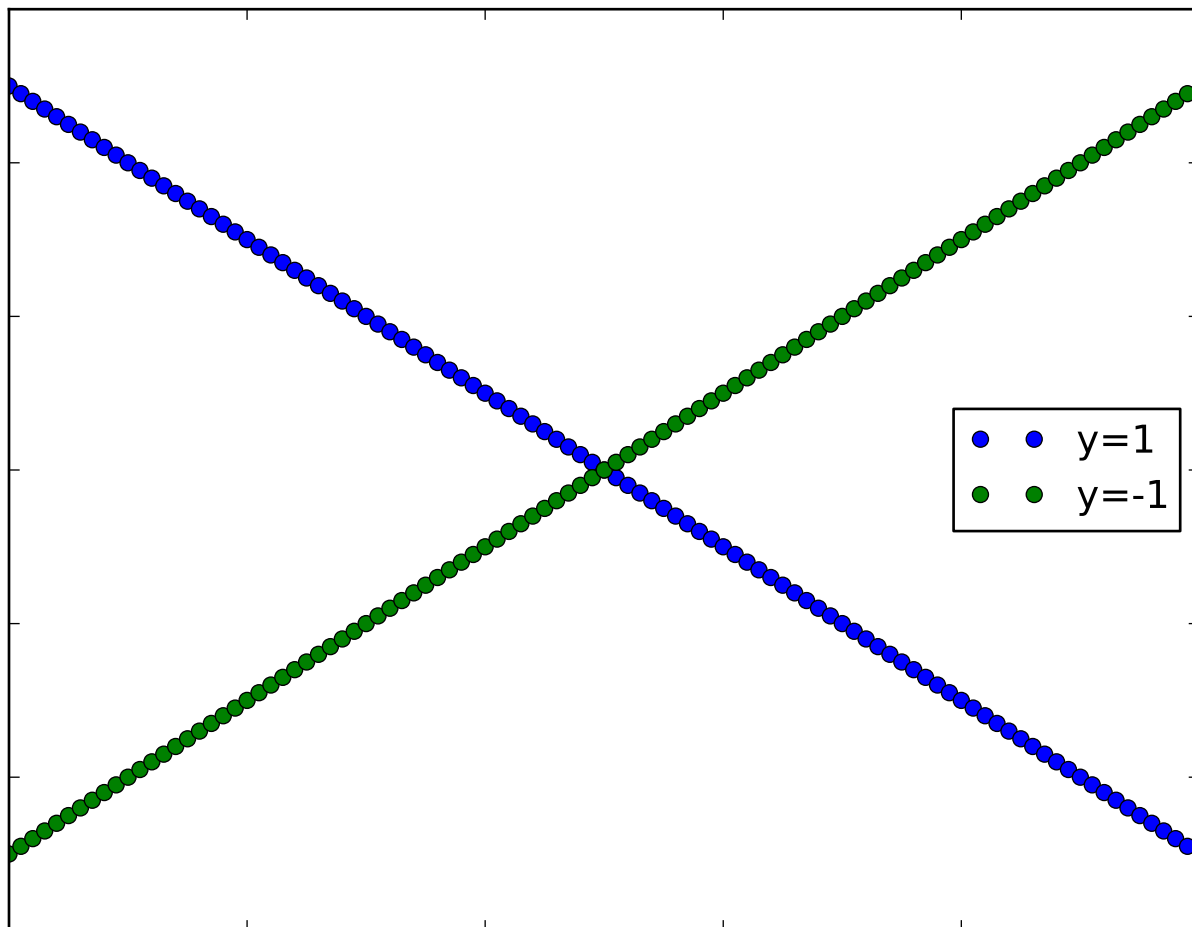

Supplement: Supplementary file 116 [file legend_auto1.pdf › Mac OS X/dist/avlog.app/Contents/Resources/lib/python2.7/matplotlib/tests/baseline_images/test_legend/legend_auto1.pdf]

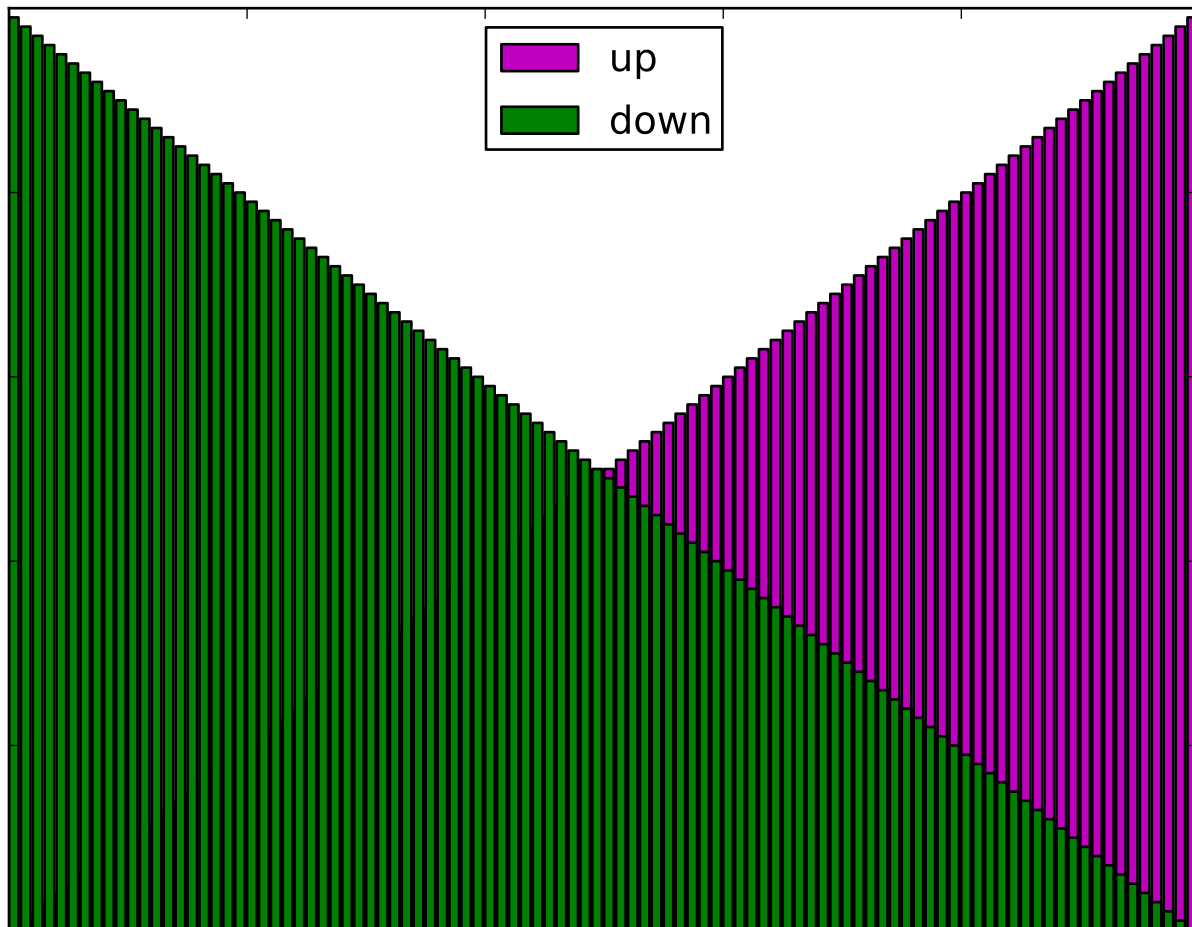

Supplement: Supplementary file 117 [file legend_auto2.pdf › Mac OS X/dist/avlog.app/Contents/Resources/lib/python2.7/matplotlib/tests/baseline_images/test_legend/legend_auto2.pdf]

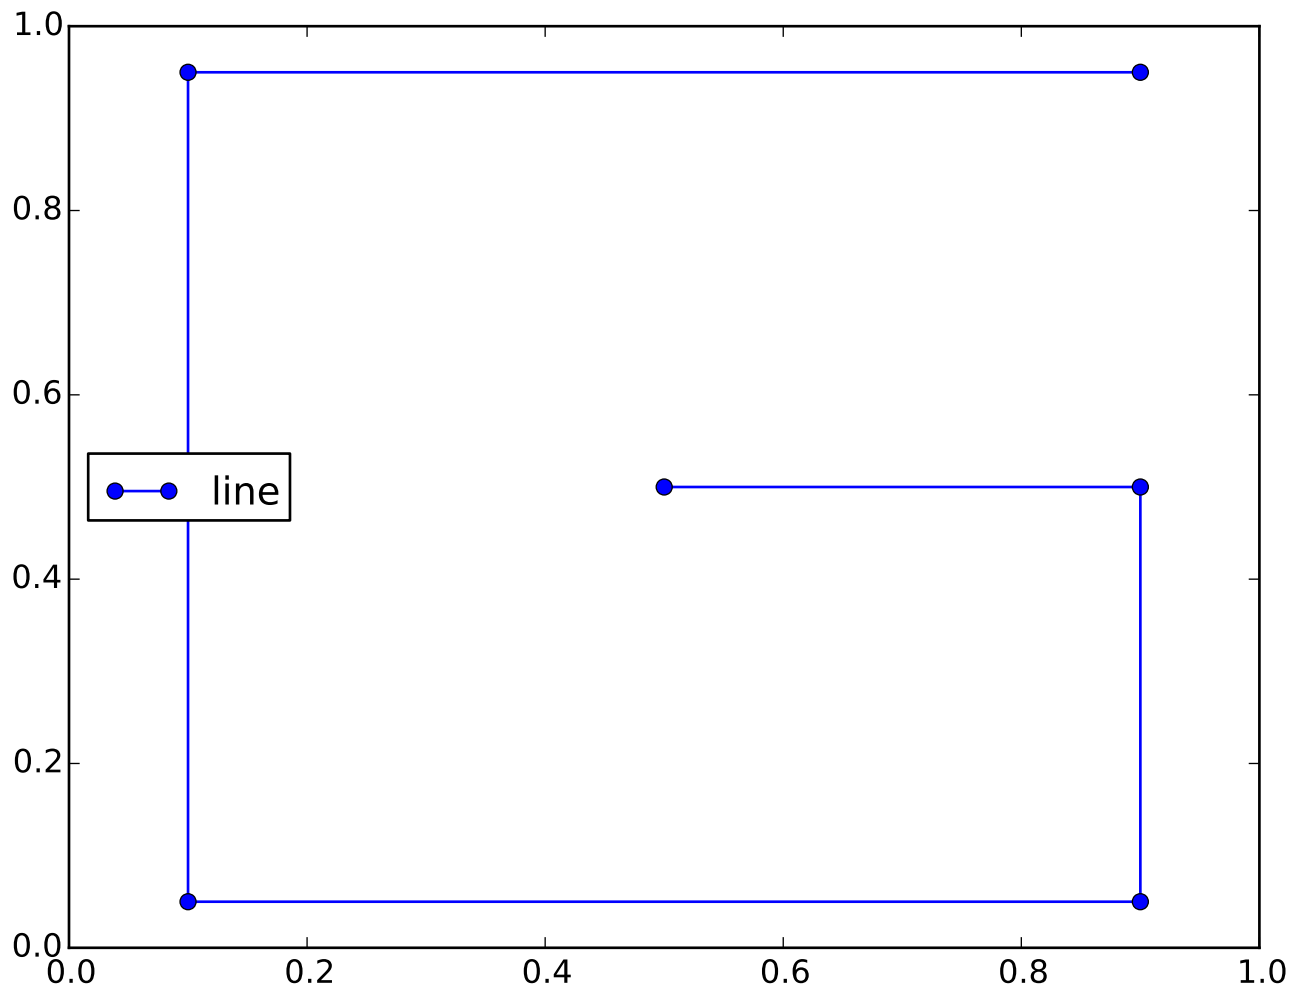

Supplement: Supplementary file 118 [file legend_auto3.pdf › Mac OS X/dist/avlog.app/Contents/Resources/lib/python2.7/matplotlib/tests/baseline_images/test_legend/legend_auto3.pdf]

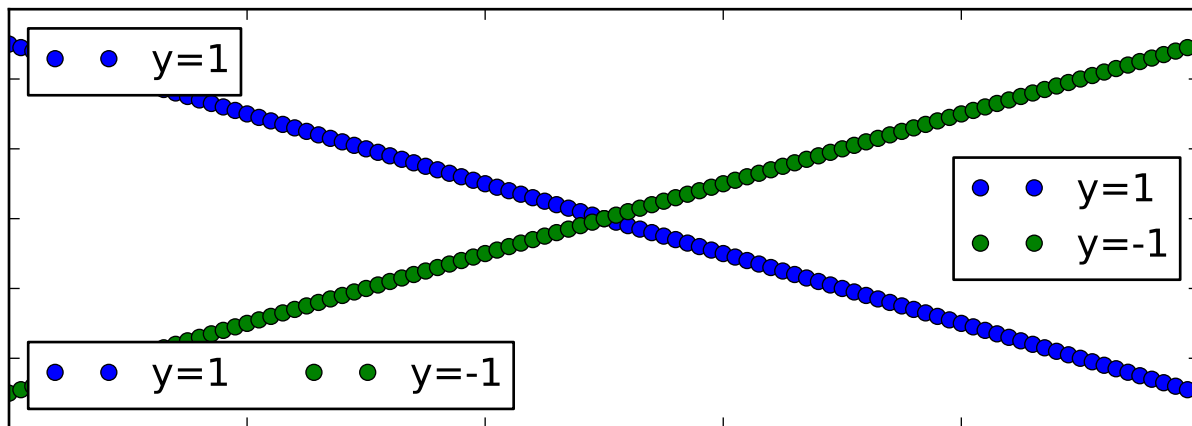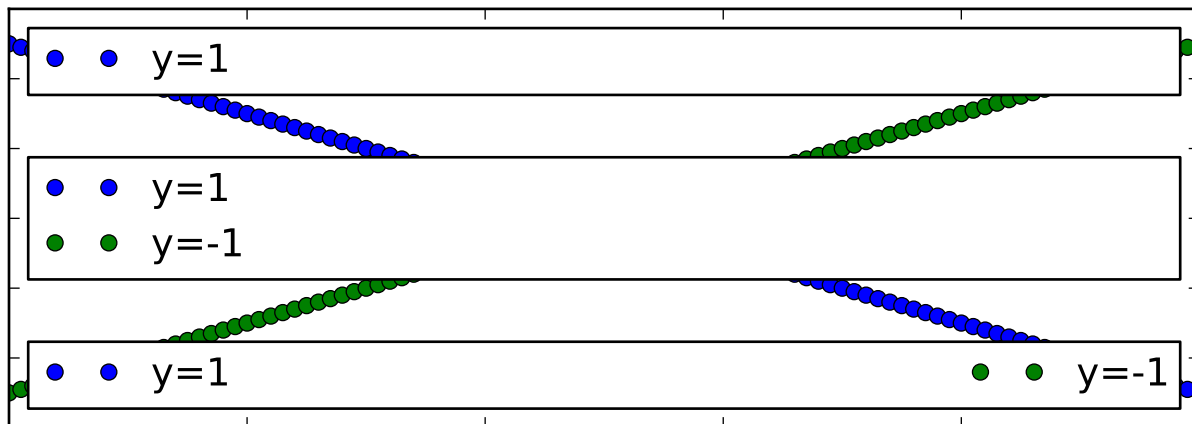

Supplement: Supplementary file 119 [file legend_expand.pdf › Mac OS X/dist/avlog.app/Contents/Resources/lib/python2.7/matplotlib/tests/baseline_images/test_legend/legend_expand.pdf]

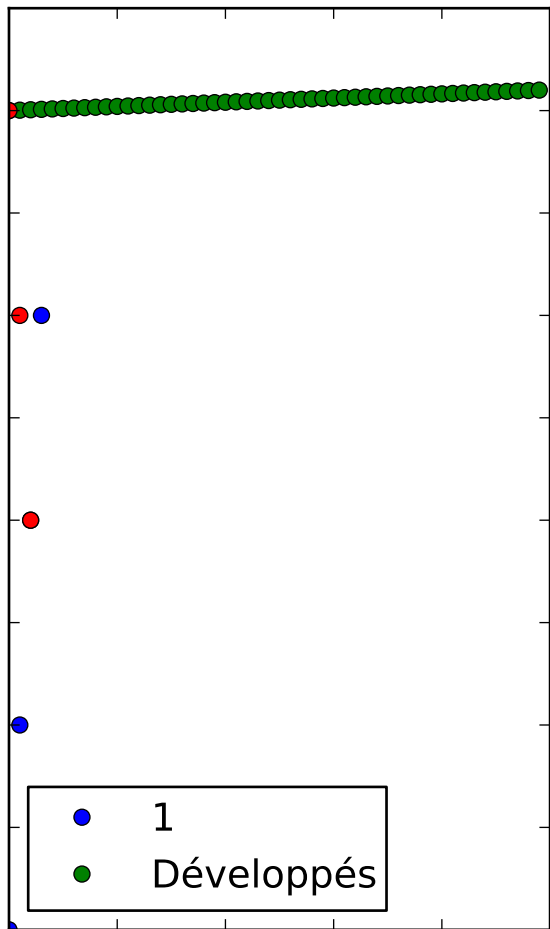

Supplement: Supplementary file 120 [file legend_various_labels.pdf › Mac OS X/dist/avlog.app/Contents/Resources/lib/python2.7/matplotlib/tests/baseline_images/test_legend/legend_various_labels.pdf]

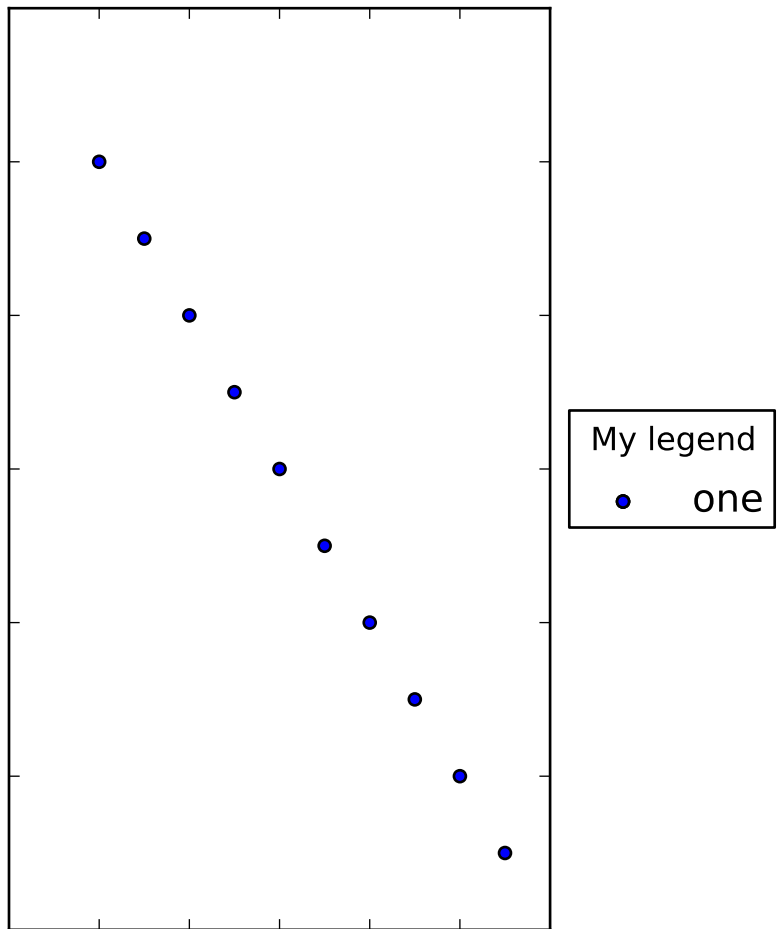

Supplement: Supplementary file 121 [file scatter_rc1.pdf › Mac OS X/dist/avlog.app/Contents/Resources/lib/python2.7/matplotlib/tests/baseline_images/test_legend/scatter_rc1.pdf]

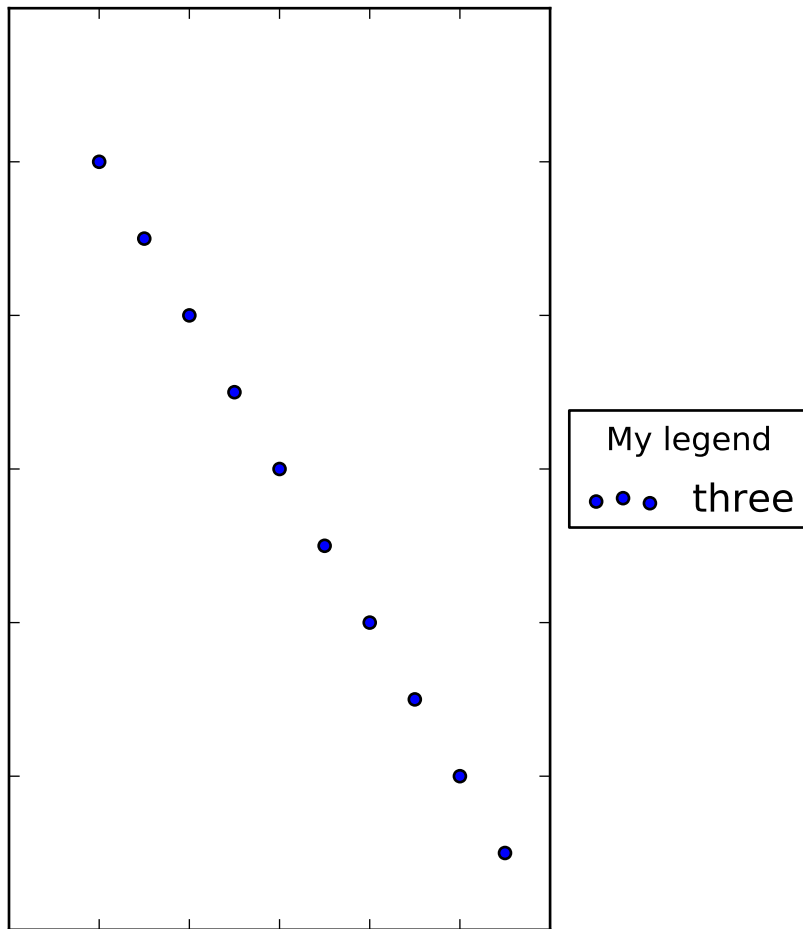

Supplement: Supplementary file 122 [file scatter_rc3.pdf › Mac OS X/dist/avlog.app/Contents/Resources/lib/python2.7/matplotlib/tests/baseline_images/test_legend/scatter_rc3.pdf]

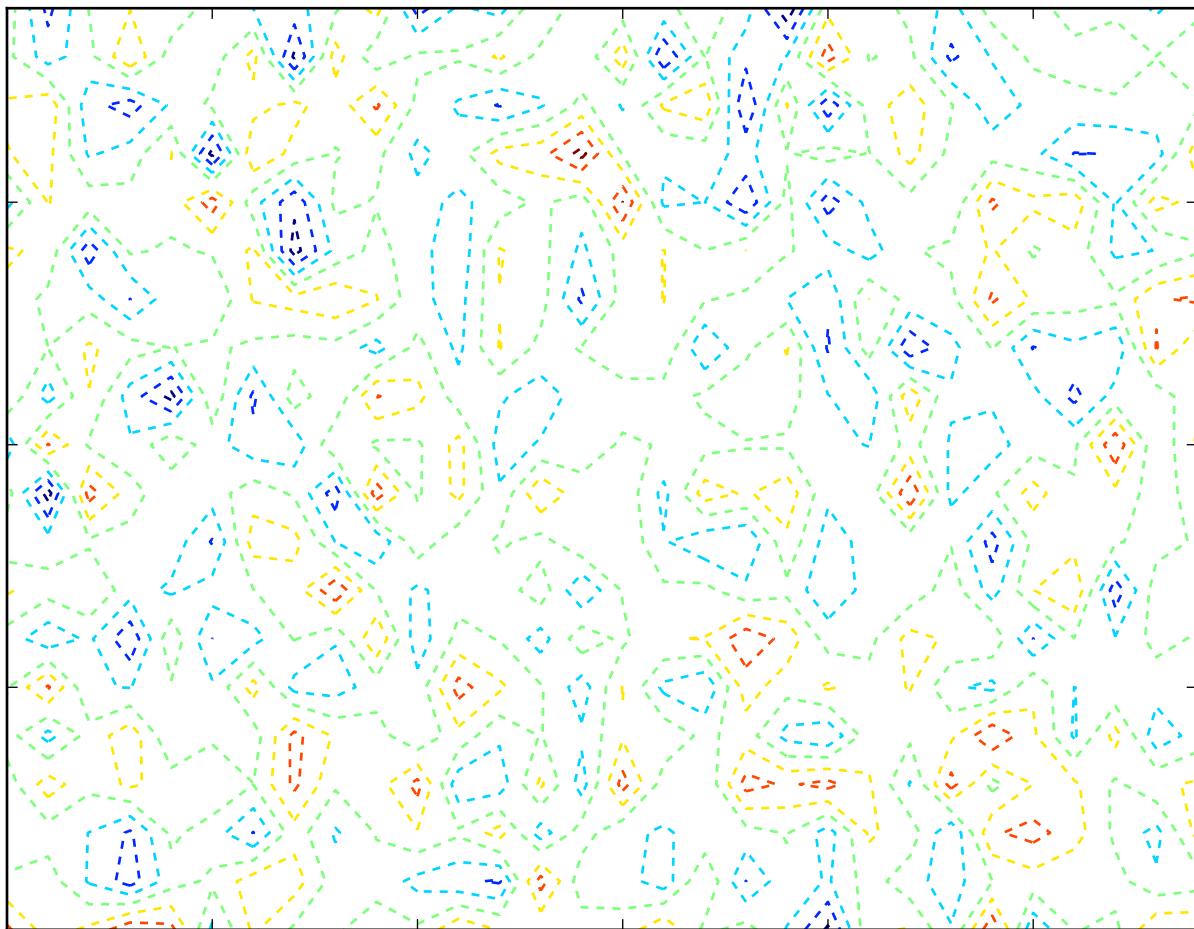

Supplement: Supplementary file 123 [file line_collection_dashes.pdf › Mac OS X/dist/avlog.app/Contents/Resources/lib/python2.7/matplotlib/tests/baseline_images/test_lines/line_collection_dashes.pdf]

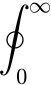

Supplement: Supplementary file 154 [file mathtext_cm_30.pdf › Mac OS X/dist/avlog.app/Contents/Resources/lib/python2.7/matplotlib/tests/baseline_images/test_mathtext/mathtext_cm_30.pdf]

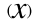

Supplement: Supplementary file 204 [file mathtext_stix_12.pdf › Mac OS X/dist/avlog.app/Contents/Resources/lib/python2.7/matplotlib/tests/baseline_images/test_mathtext/mathtext_stix_12.pdf]

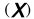

Supplement: Supplementary file 271 [file mathtext_stixsans_12.pdf › Mac OS X/dist/avlog.app/Contents/Resources/lib/python2.7/matplotlib/tests/baseline_images/test_mathtext/mathtext_stixsans_12.pdf]

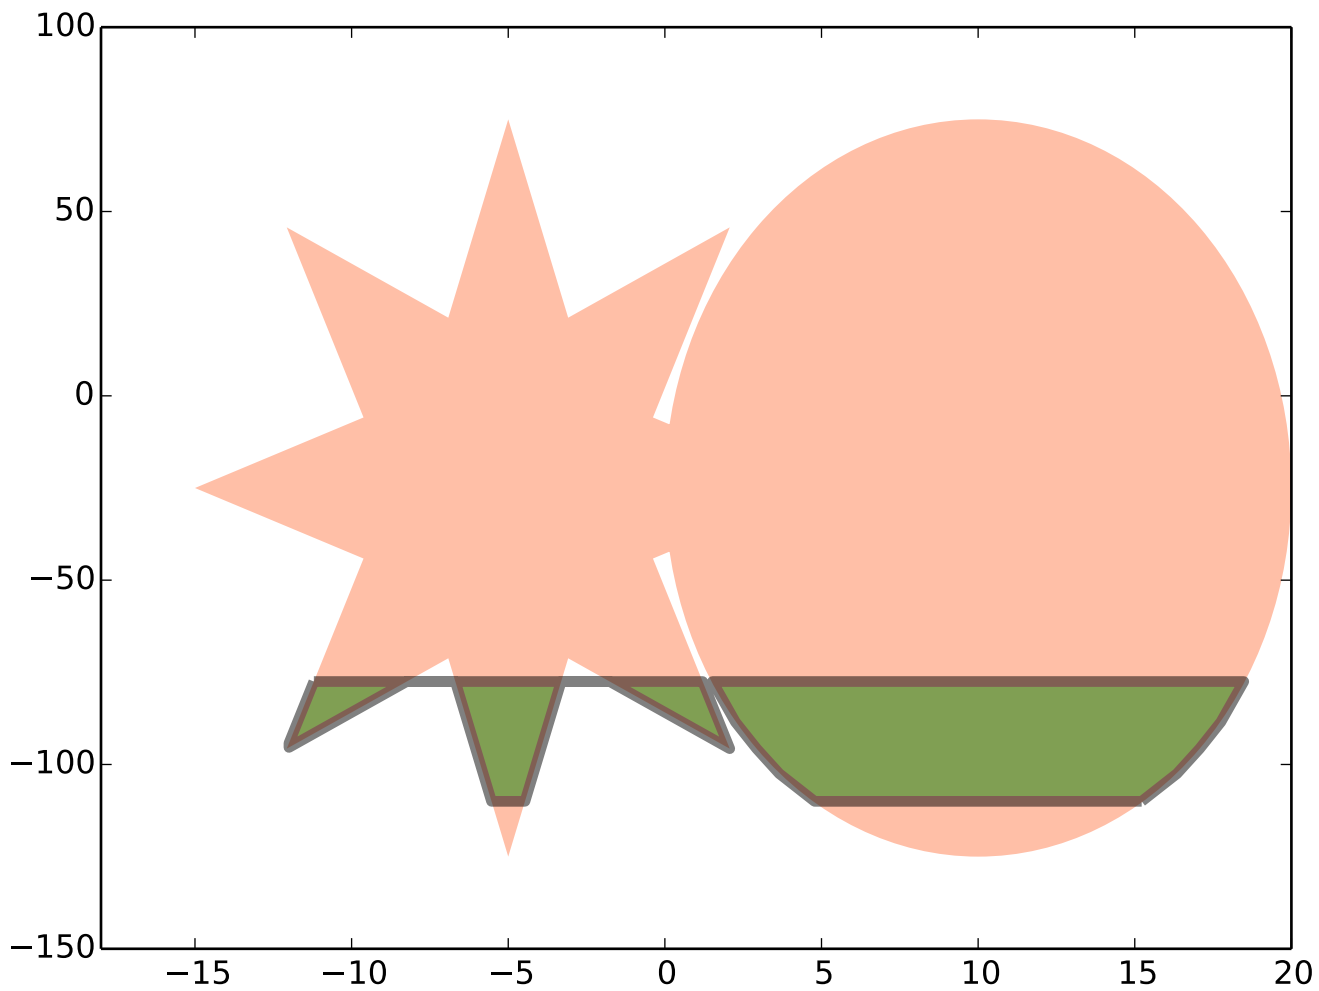

Supplement: Supplementary file 326 [file clip_to_bbox.pdf › Mac OS X/dist/avlog.app/Contents/Resources/lib/python2.7/matplotlib/tests/baseline_images/test_patches/clip_to_bbox.pdf]

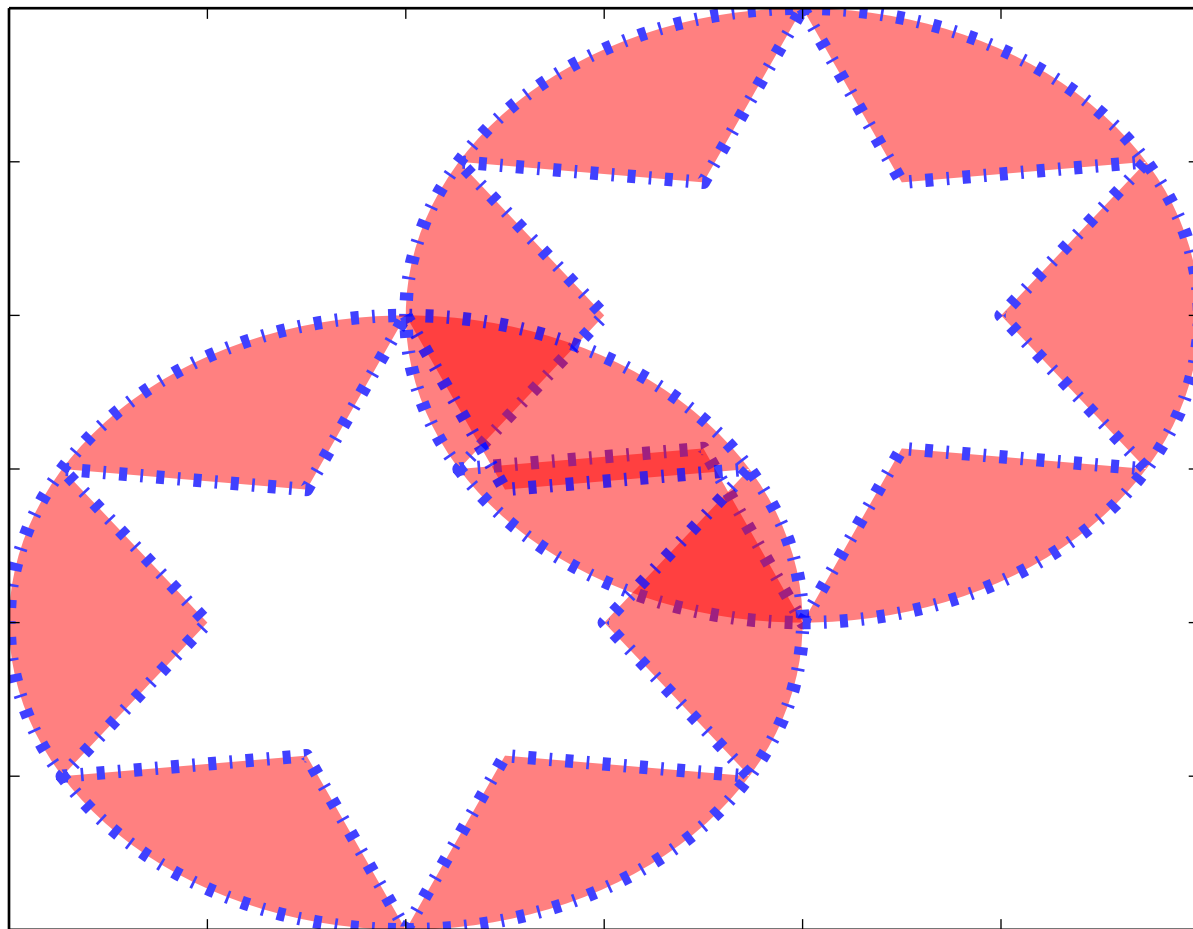

Supplement: Supplementary file 327 [file patch_alpha_coloring.pdf › Mac OS X/dist/avlog.app/Contents/Resources/lib/python2.7/matplotlib/tests/baseline_images/test_patches/patch_alpha_coloring.pdf]

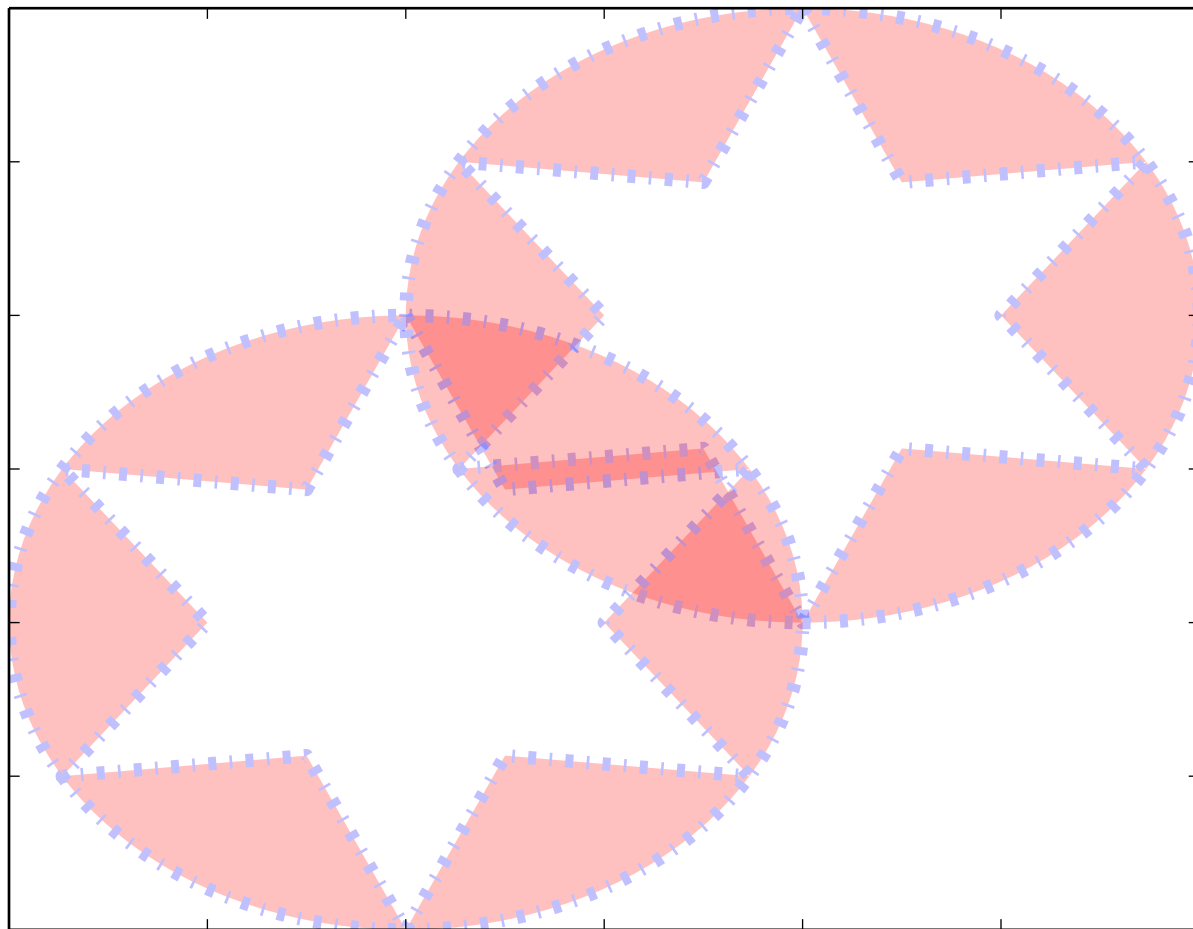

Supplement: Supplementary file 328 [file patch_alpha_override.pdf › Mac OS X/dist/avlog.app/Contents/Resources/lib/python2.7/matplotlib/tests/baseline_images/test_patches/patch_alpha_override.pdf]

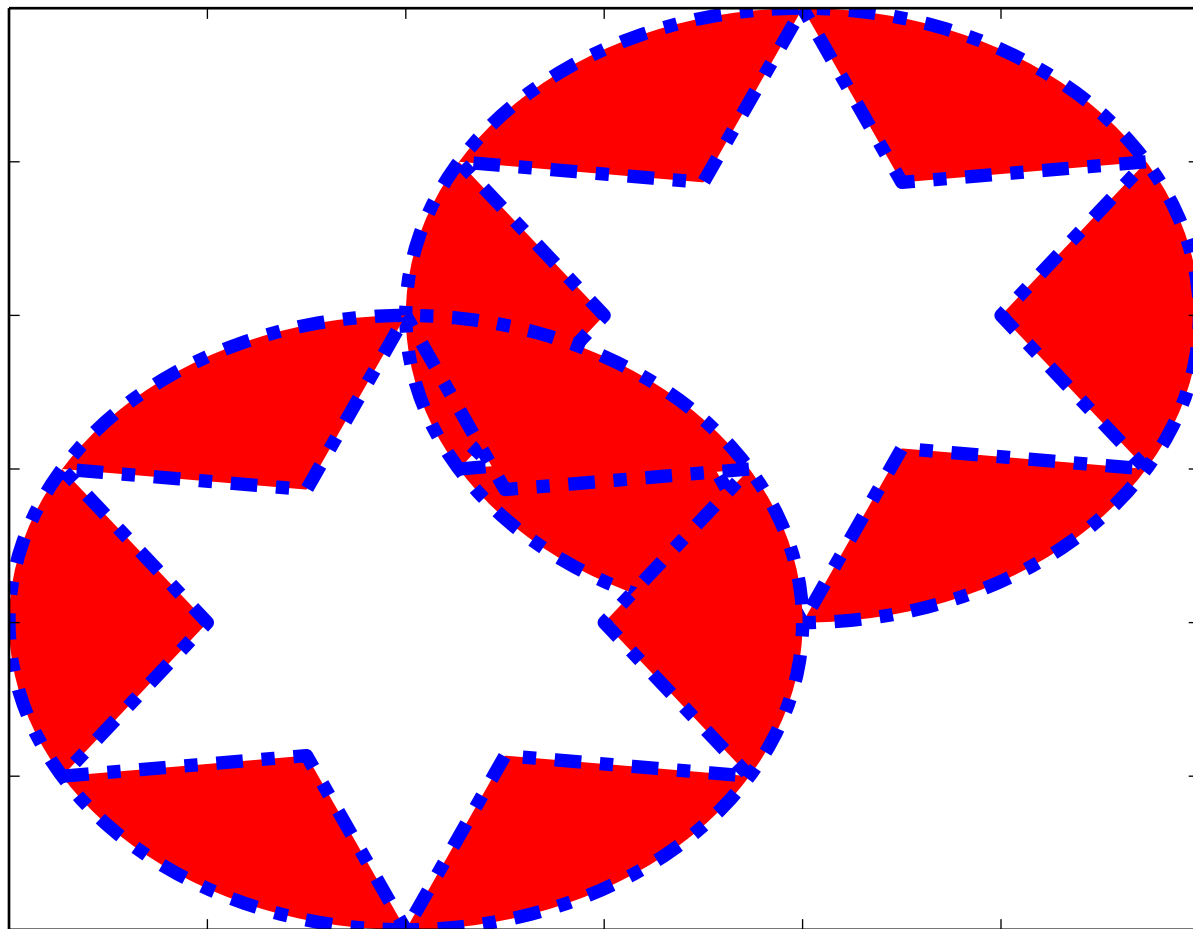

Supplement: Supplementary file 329 [file patch_custom_linestyle.pdf › Mac OS X/dist/avlog.app/Contents/Resources/lib/python2.7/matplotlib/tests/baseline_images/test_patches/patch_custom_linestyle.pdf]

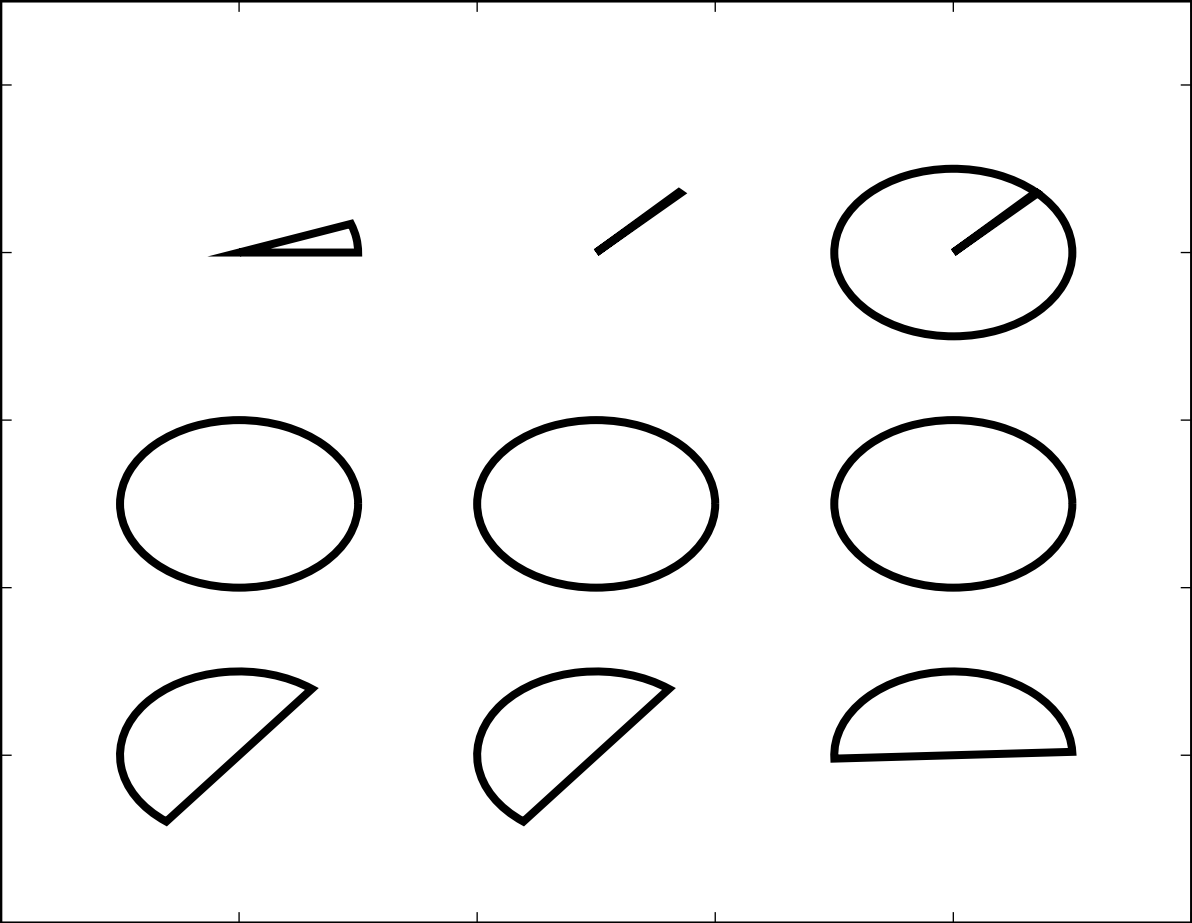

Supplement: Supplementary file 330 [file wedge_range.pdf › Mac OS X/dist/avlog.app/Contents/Resources/lib/python2.7/matplotlib/tests/baseline_images/test_patches/wedge_range.pdf]

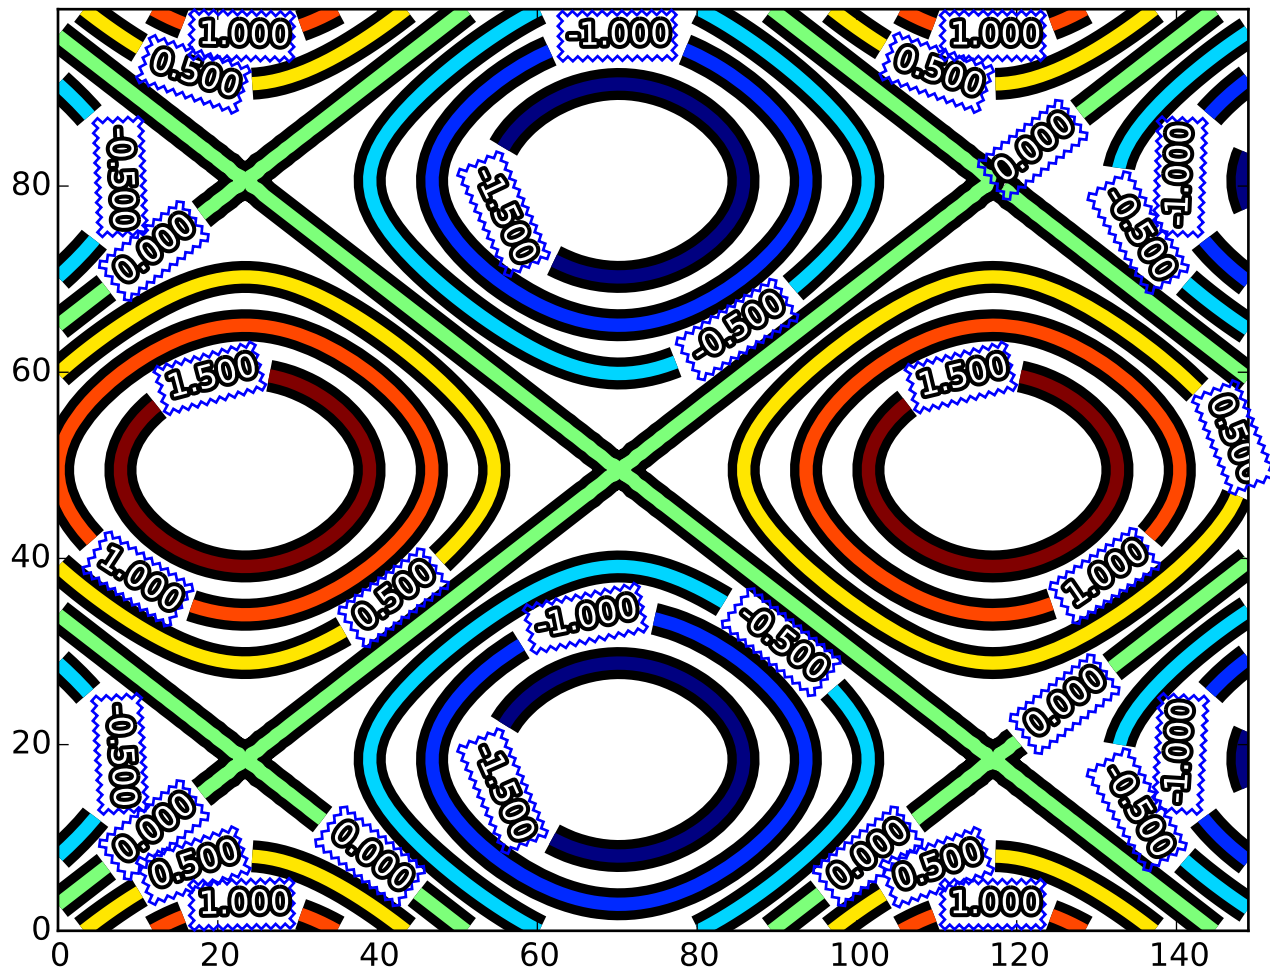

Supplement: Supplementary file 331 [file collection.pdf › Mac OS X/dist/avlog.app/Contents/Resources/lib/python2.7/matplotlib/tests/baseline_images/test_patheffects/collection.pdf]

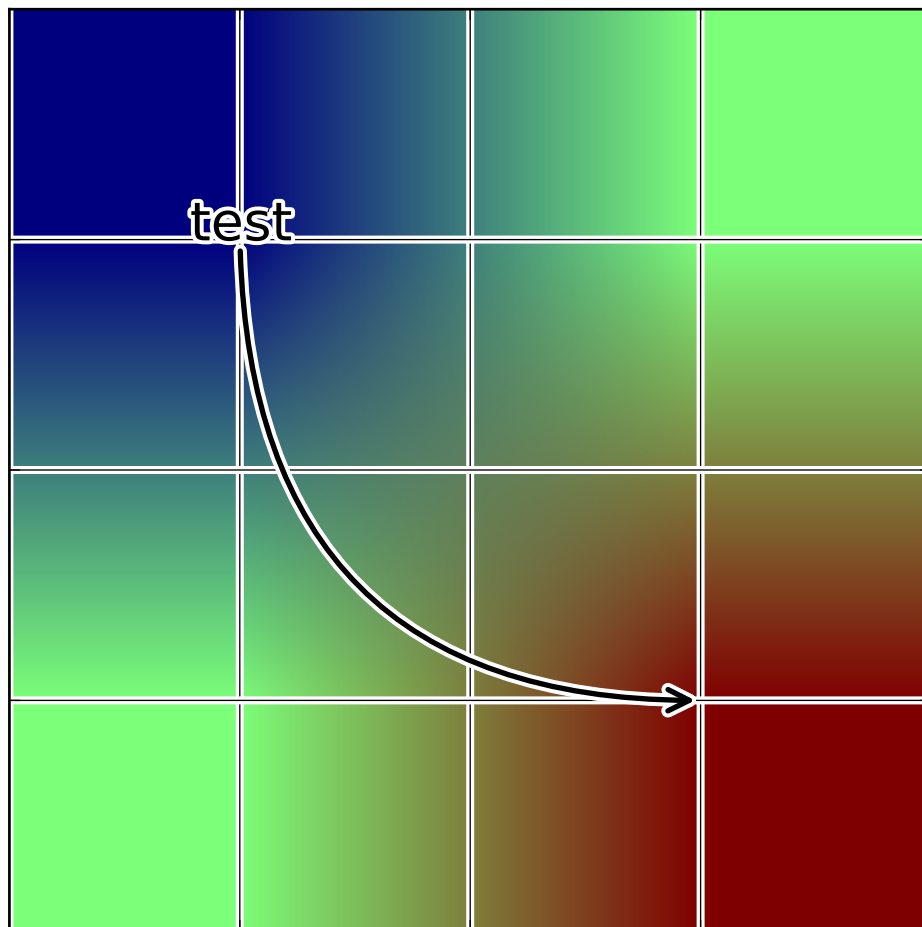

Supplement: Supplementary file 332 [file patheffect1.pdf › Mac OS X/dist/avlog.app/Contents/Resources/lib/python2.7/matplotlib/tests/baseline_images/test_patheffects/patheffect1.pdf]

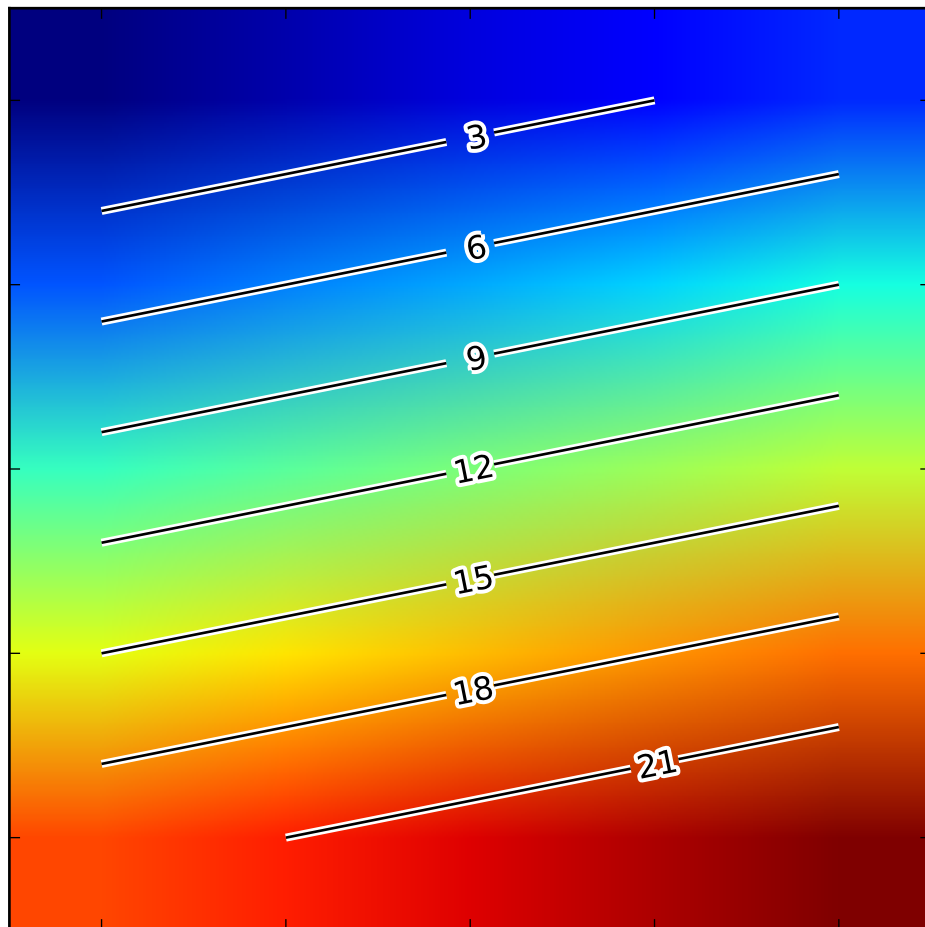

Supplement: Supplementary file 333 [file patheffect2.pdf › Mac OS X/dist/avlog.app/Contents/Resources/lib/python2.7/matplotlib/tests/baseline_images/test_patheffects/patheffect2.pdf]

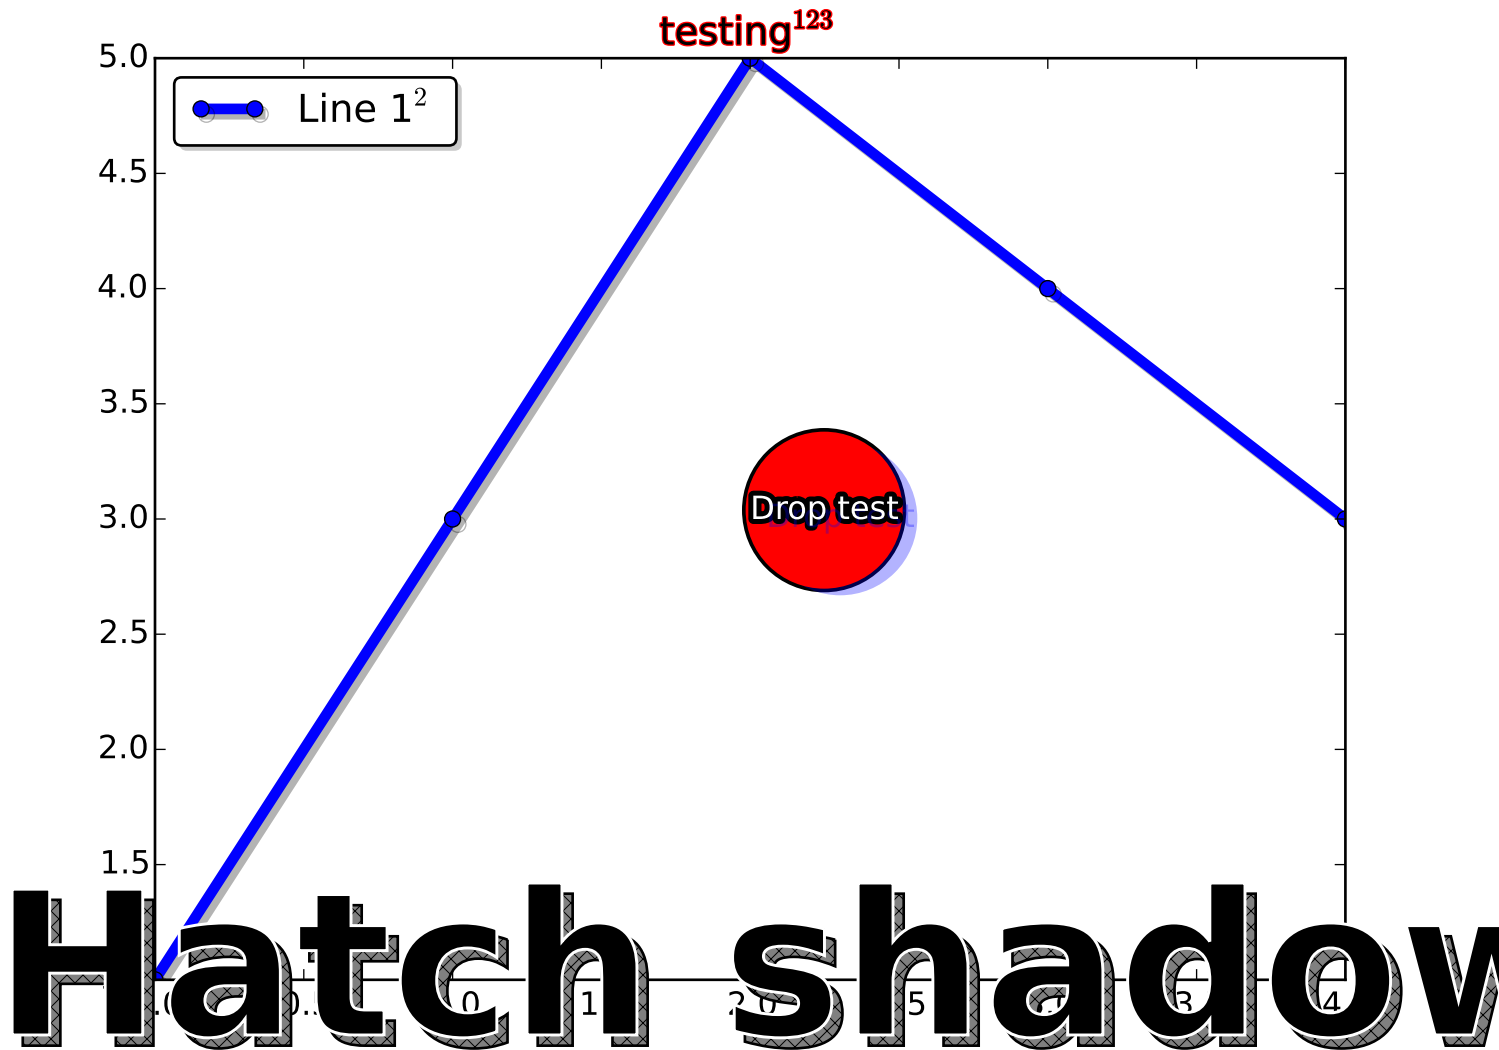

Supplement: Supplementary file 334 [file patheffect3.pdf › Mac OS X/dist/avlog.app/Contents/Resources/lib/python2.7/matplotlib/tests/baseline_images/test_patheffects/patheffect3.pdf]

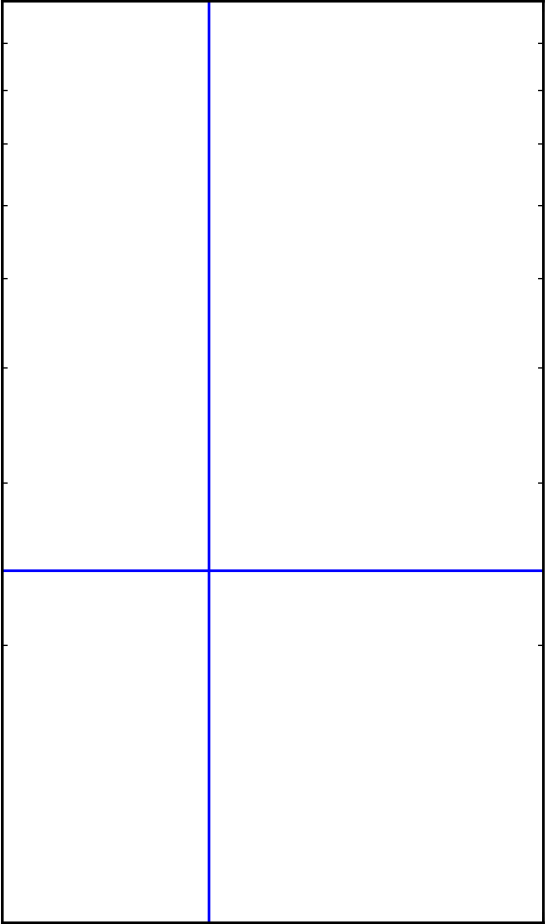

Supplement: Supplementary file 335 [file log_scales.pdf › Mac OS X/dist/avlog.app/Contents/Resources/lib/python2.7/matplotlib/tests/baseline_images/test_scale/log_scales.pdf]

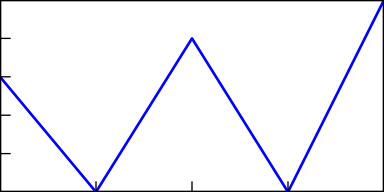

Supplement: Supplementary file 336 [file clipper_edge.pdf › Mac OS X/dist/avlog.app/Contents/Resources/lib/python2.7/matplotlib/tests/baseline_images/test_simplification/clipper_edge.pdf]

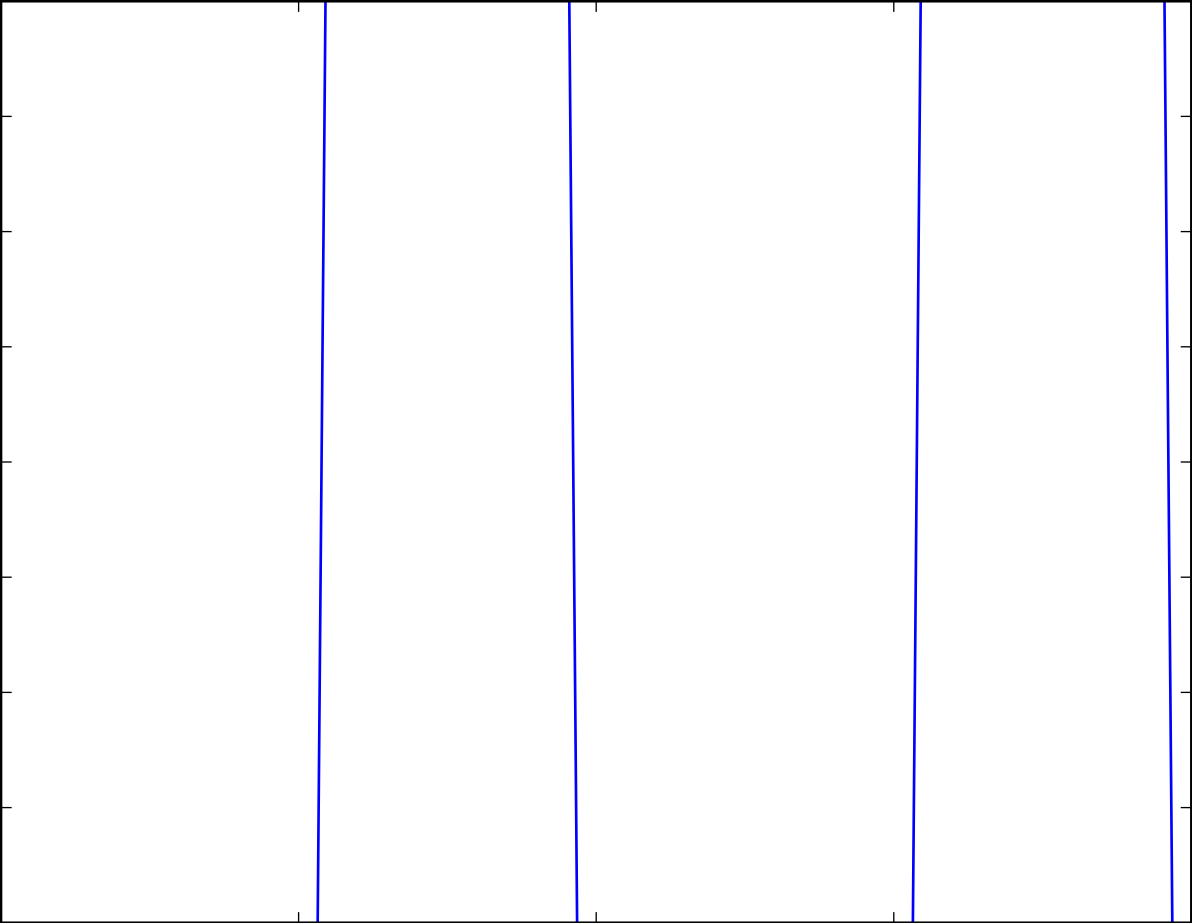

Supplement: Supplementary file 337 [file clipping.pdf › Mac OS X/dist/avlog.app/Contents/Resources/lib/python2.7/matplotlib/tests/baseline_images/test_simplification/clipping.pdf]

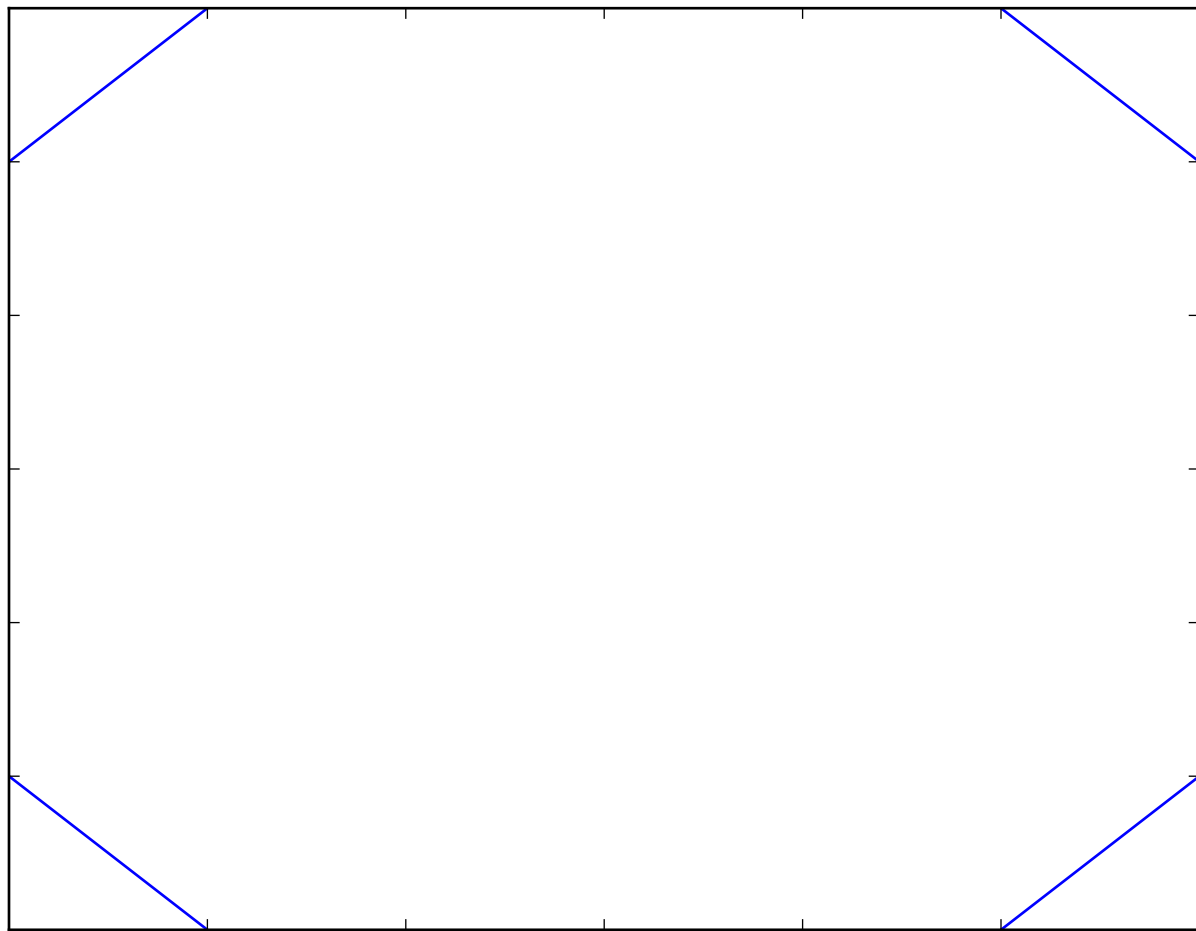

Supplement: Supplementary file 338 [file clipping_diamond.pdf › Mac OS X/dist/avlog.app/Contents/Resources/lib/python2.7/matplotlib/tests/baseline_images/test_simplification/clipping_diamond.pdf]

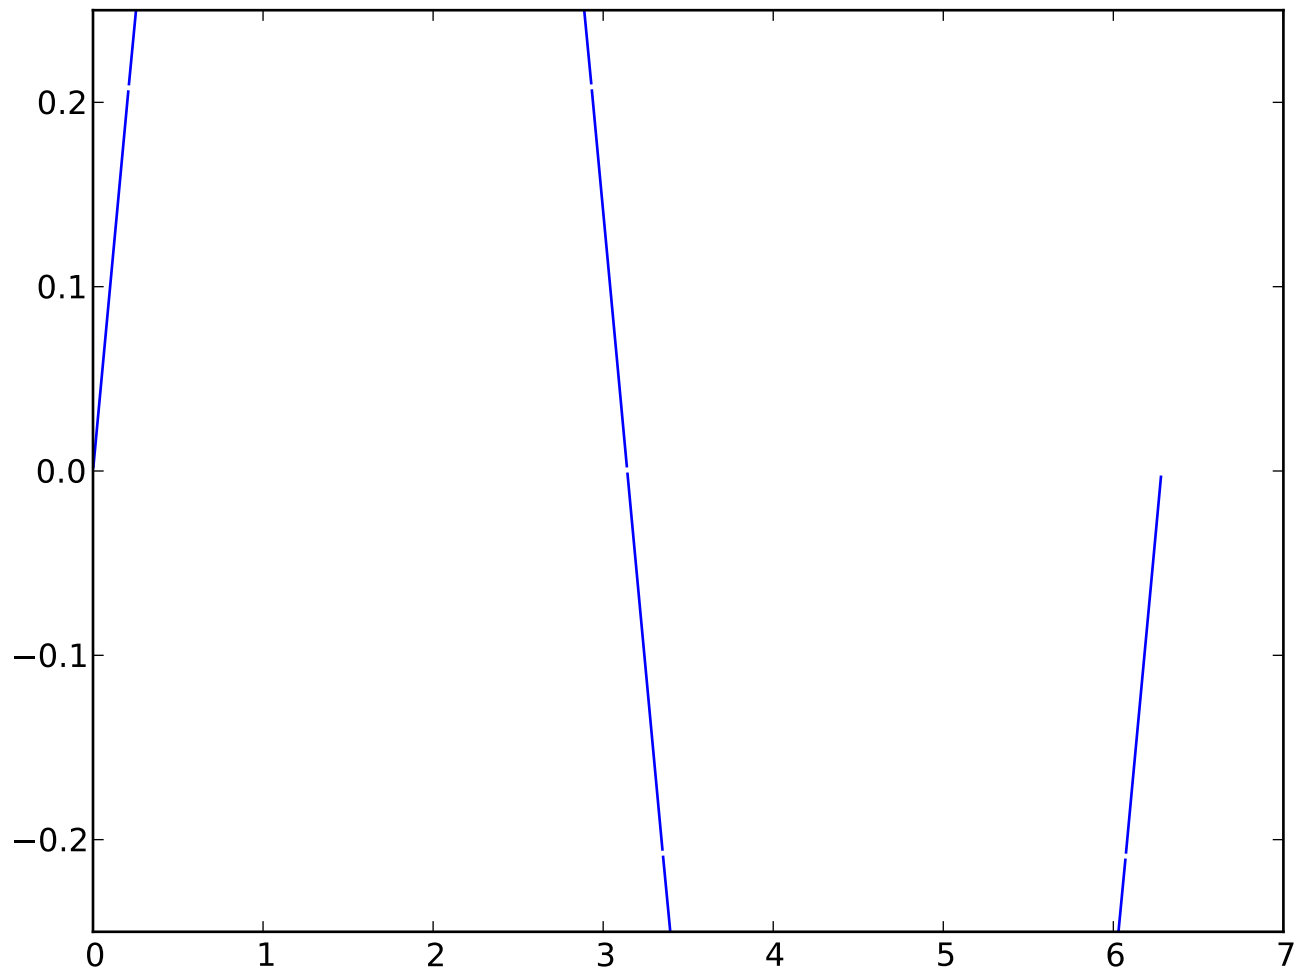

Supplement: Supplementary file 339 [file clipping_with_nans.pdf › Mac OS X/dist/avlog.app/Contents/Resources/lib/python2.7/matplotlib/tests/baseline_images/test_simplification/clipping_with_nans.pdf]

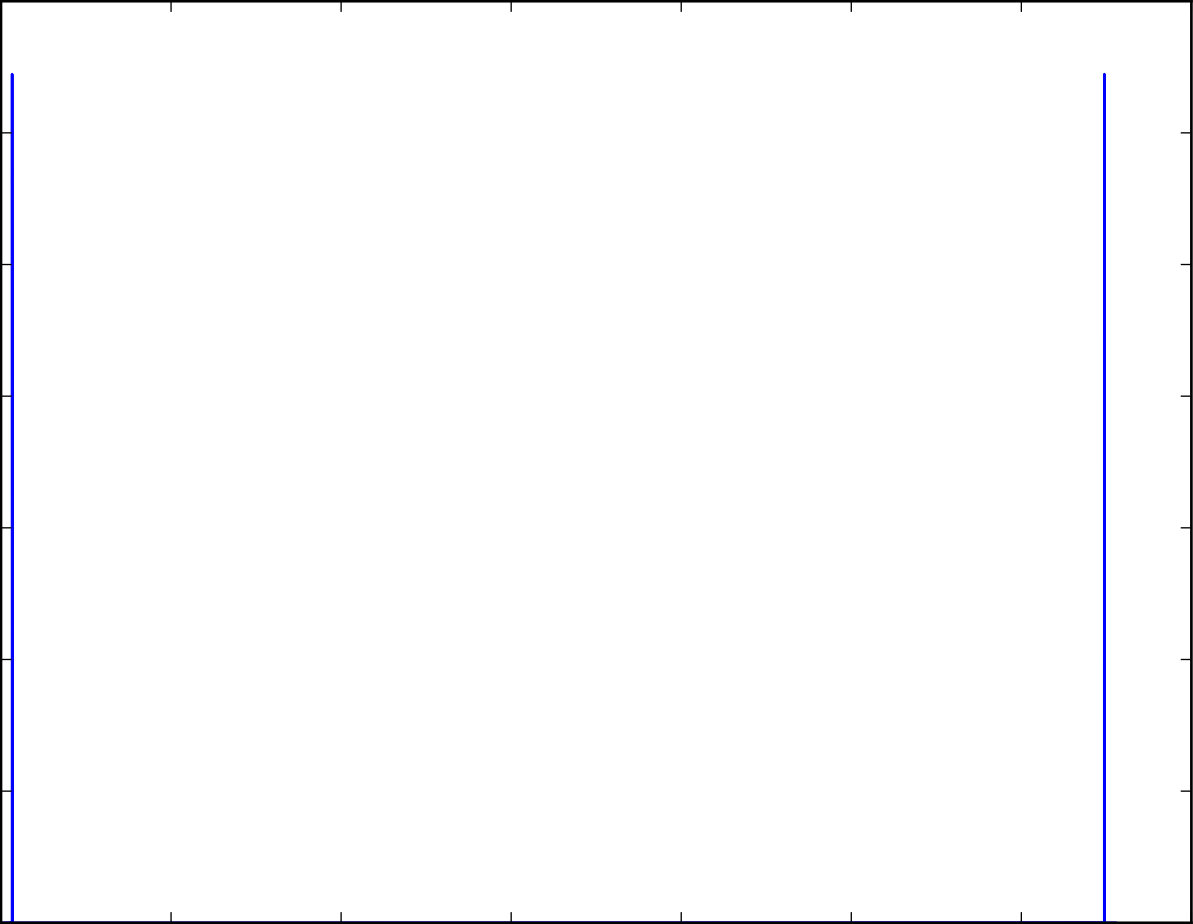

Supplement: Supplementary file 340 [file fft_peaks.pdf › Mac OS X/dist/avlog.app/Contents/Resources/lib/python2.7/matplotlib/tests/baseline_images/test_simplification/fft_peaks.pdf]

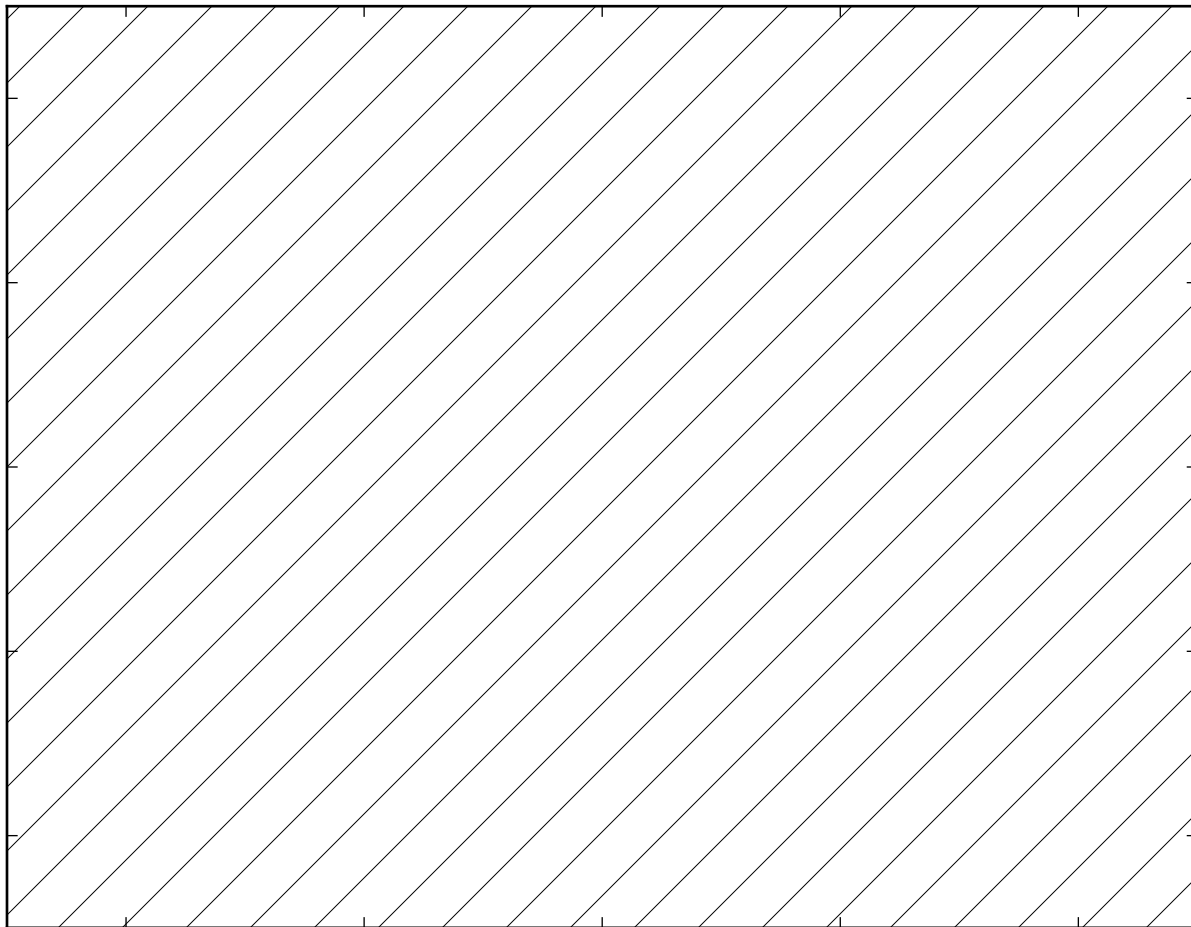

Supplement: Supplementary file 341 [file hatch_simplify.pdf › Mac OS X/dist/avlog.app/Contents/Resources/lib/python2.7/matplotlib/tests/baseline_images/test_simplification/hatch_simplify.pdf]

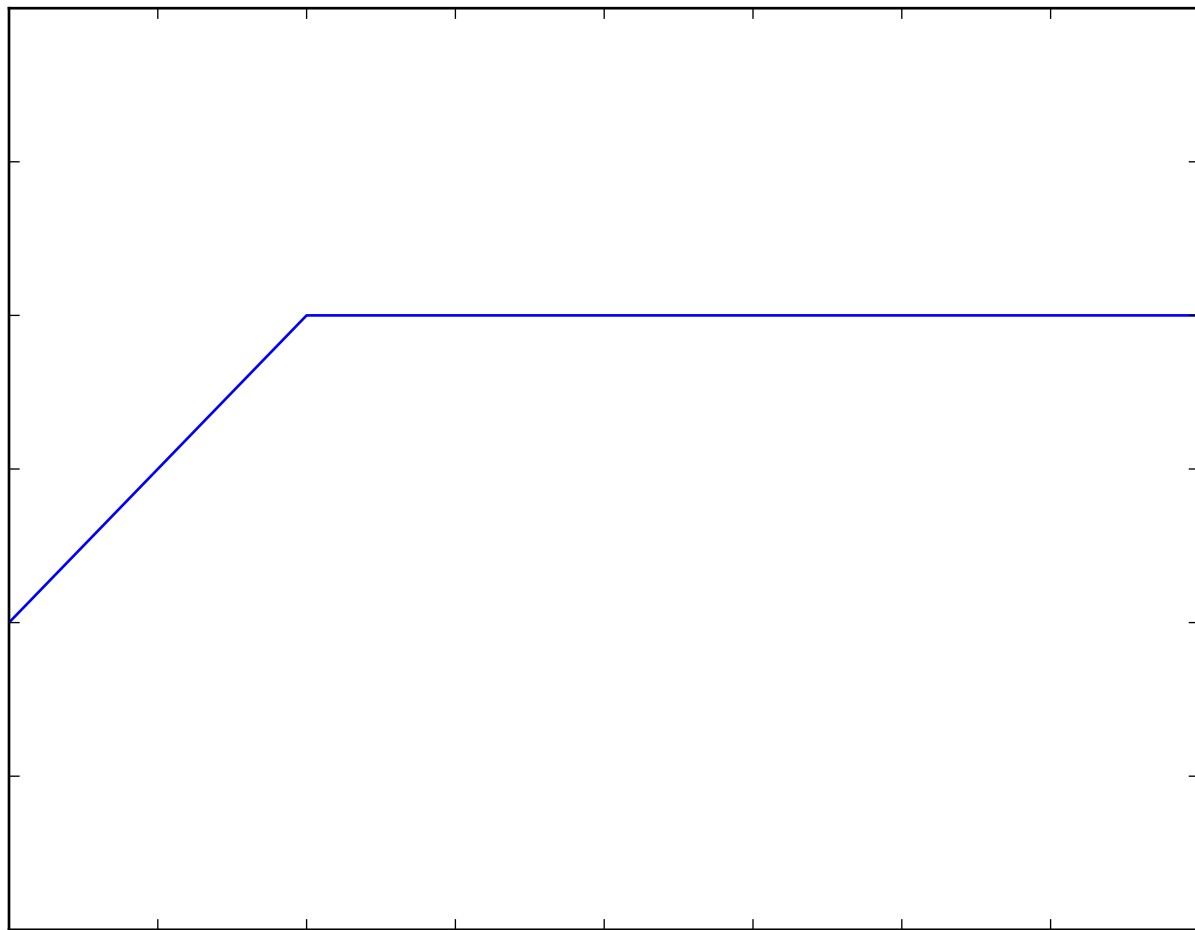

Supplement: Supplementary file 342 [file overflow.pdf › Mac OS X/dist/avlog.app/Contents/Resources/lib/python2.7/matplotlib/tests/baseline_images/test_simplification/overflow.pdf]

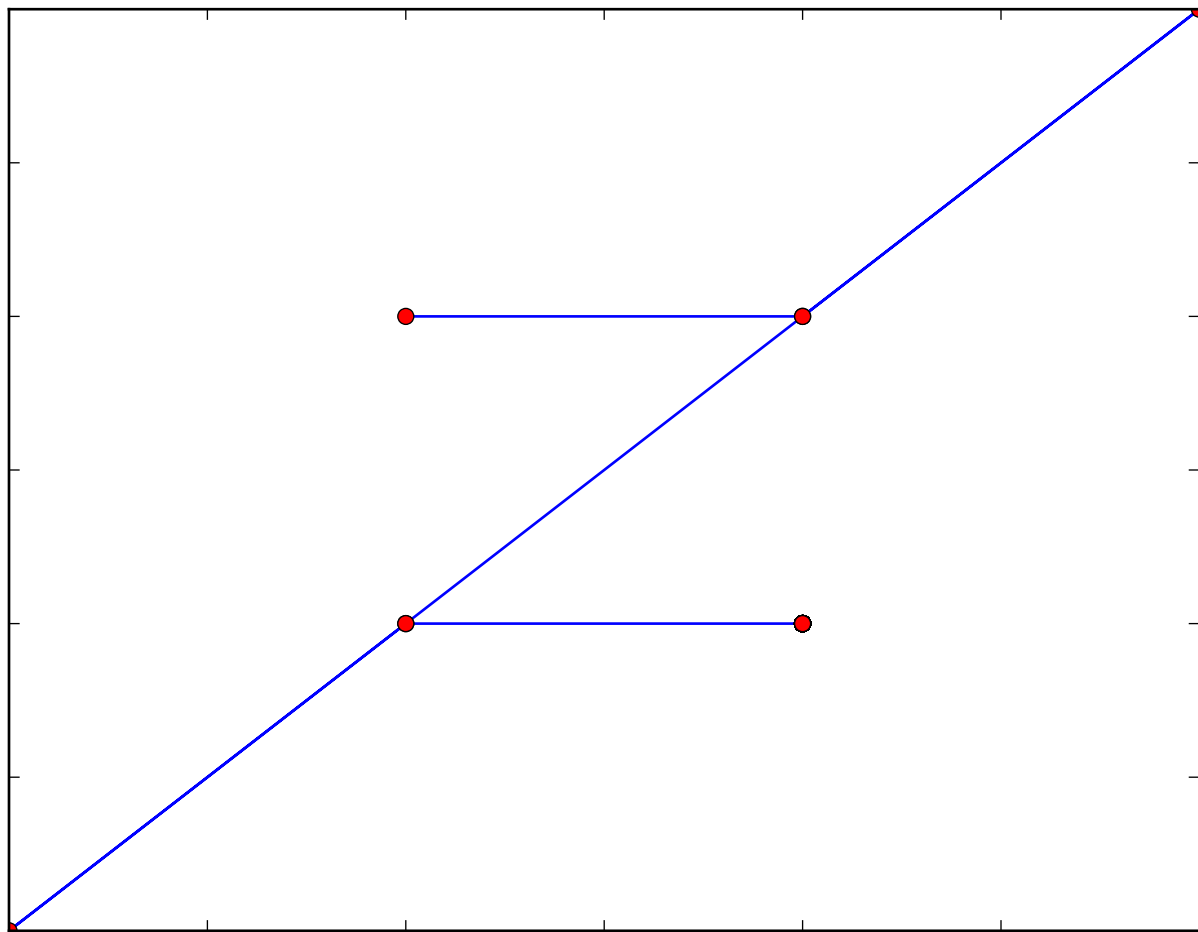

Supplement: Supplementary file 343 [file para_equal_perp.pdf › Mac OS X/dist/avlog.app/Contents/Resources/lib/python2.7/matplotlib/tests/baseline_images/test_simplification/para_equal_perp.pdf]

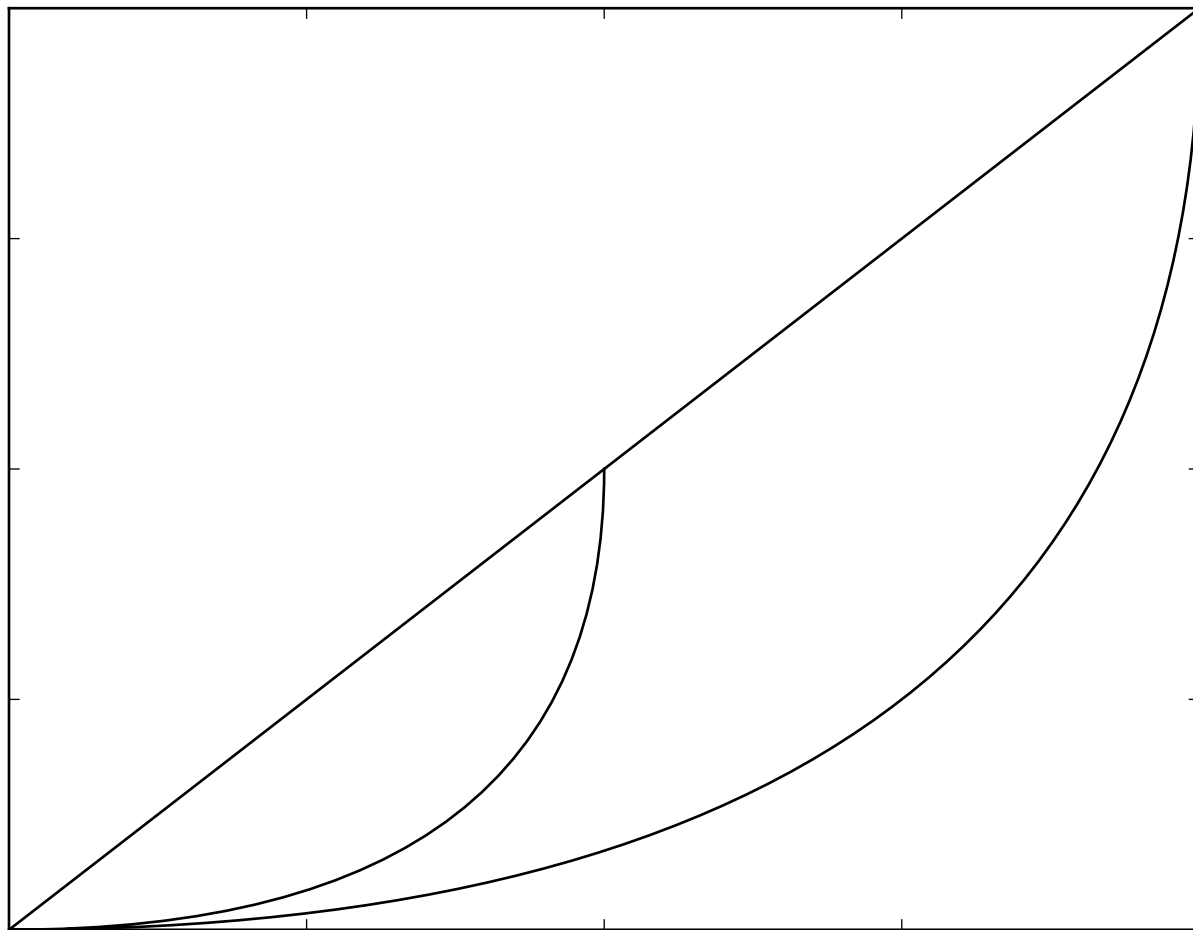

Supplement: Supplementary file 344 [file simplify_curve.pdf › Mac OS X/dist/avlog.app/Contents/Resources/lib/python2.7/matplotlib/tests/baseline_images/test_simplification/simplify_curve.pdf]

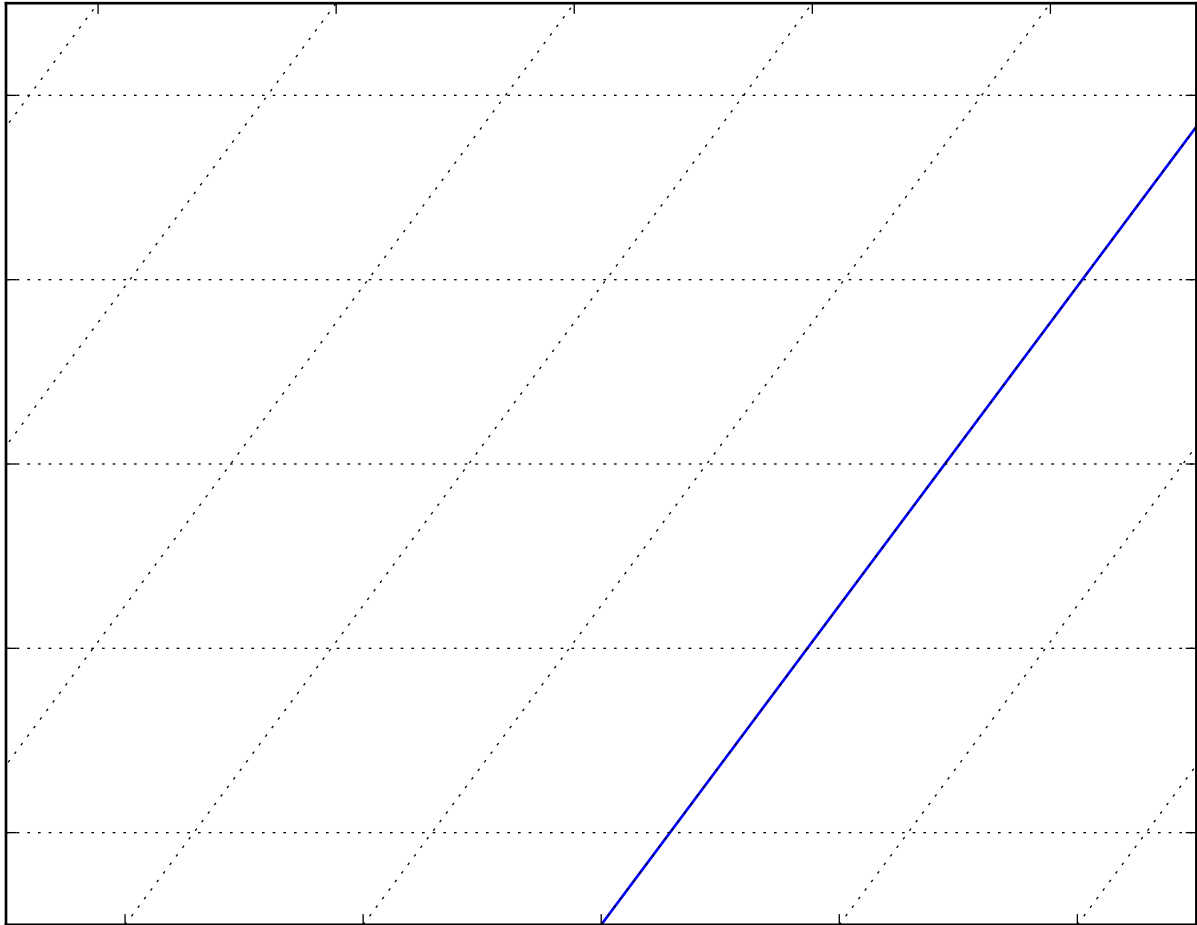

Supplement: Supplementary file 345 [file skew_axes.pdf › Mac OS X/dist/avlog.app/Contents/Resources/lib/python2.7/matplotlib/tests/baseline_images/test_skew/skew_axes.pdf]

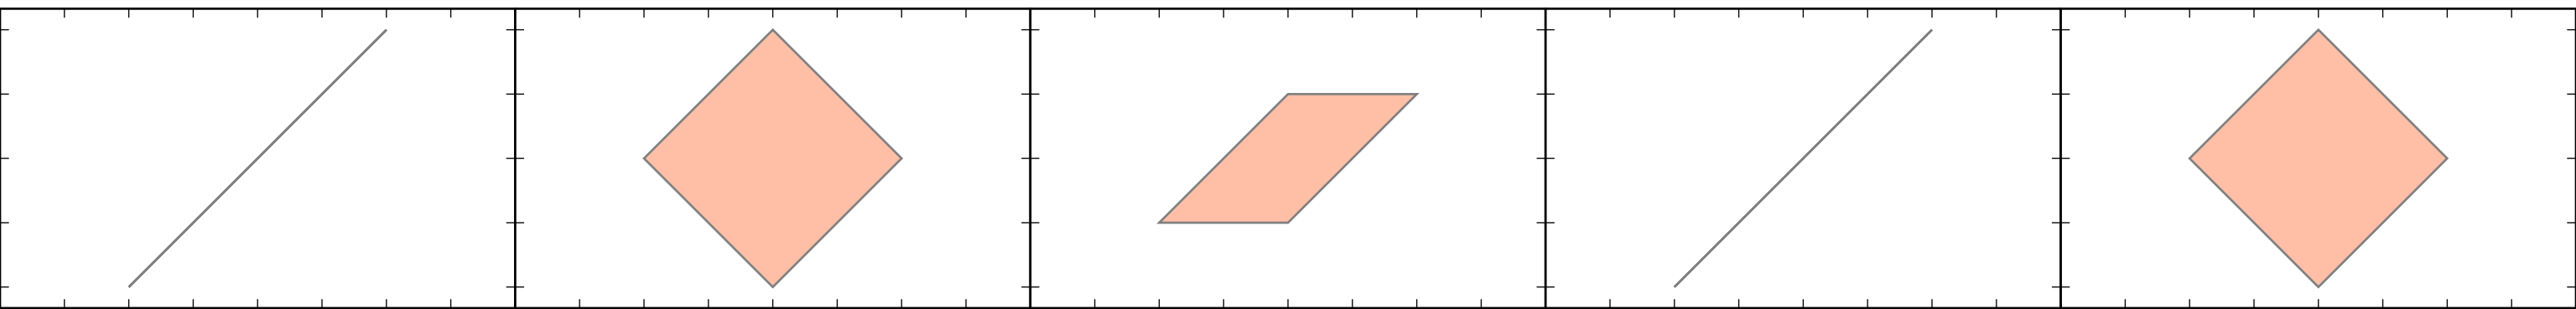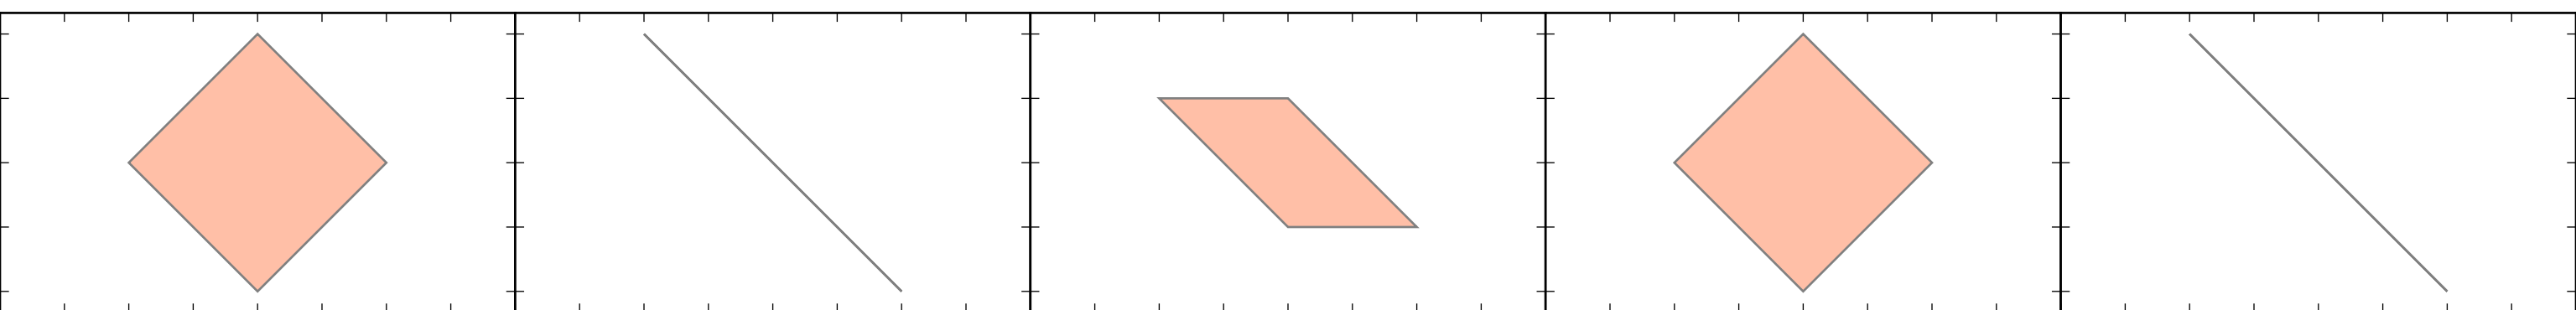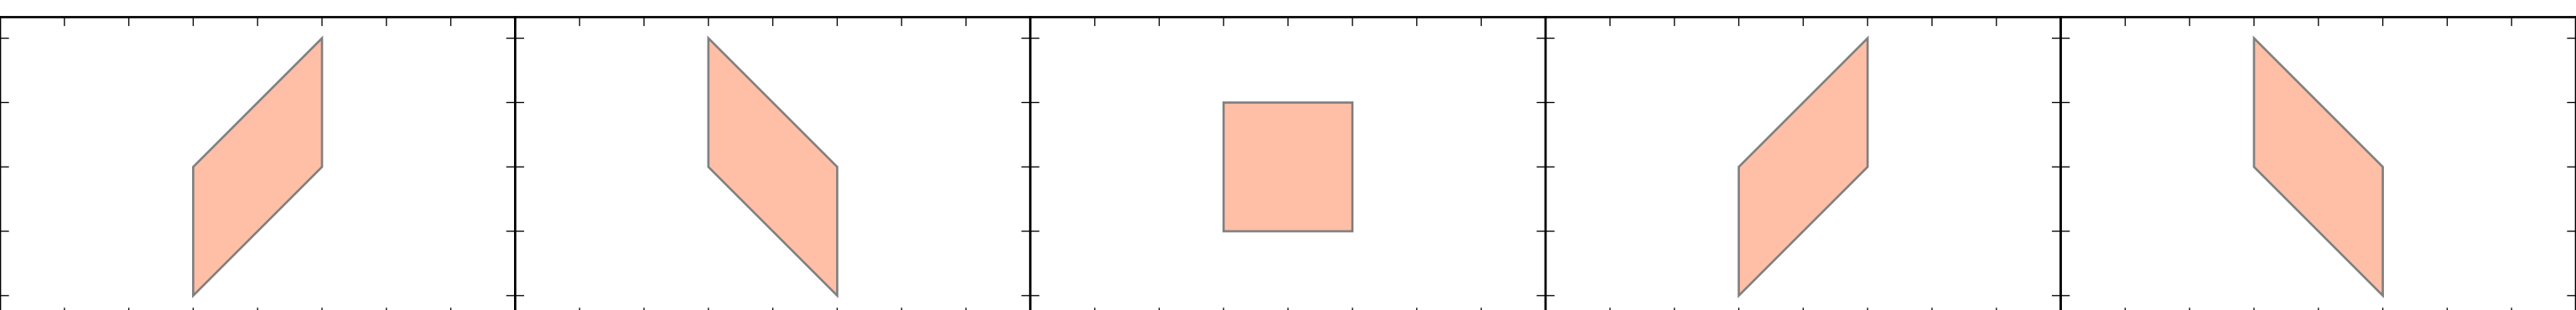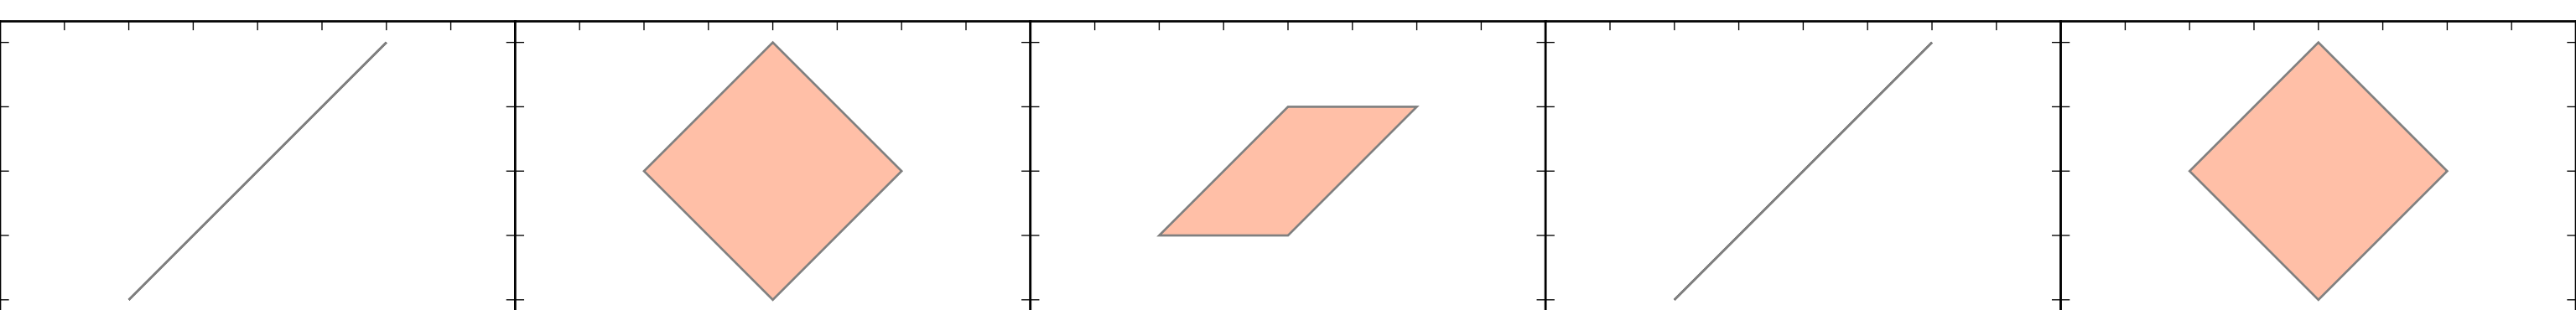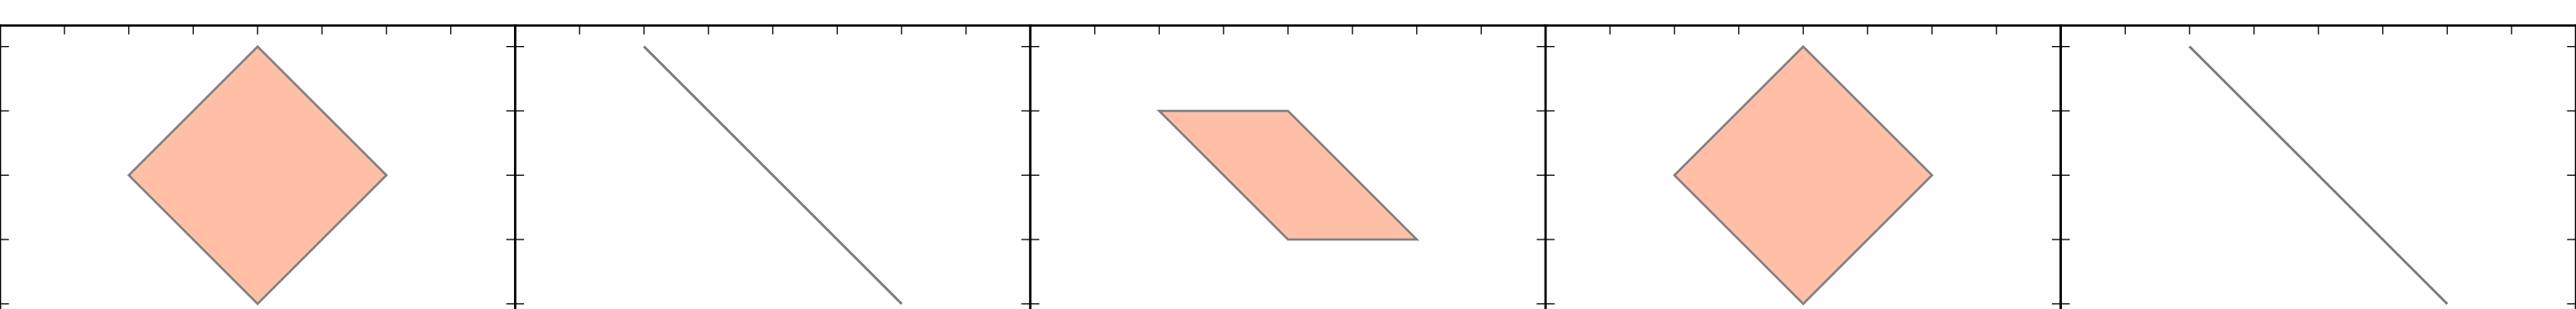

Supplement: Supplementary file 346 [file skew_rects.pdf › Mac OS X/dist/avlog.app/Contents/Resources/lib/python2.7/matplotlib/tests/baseline_images/test_skew/skew_rects.pdf]

centered spines

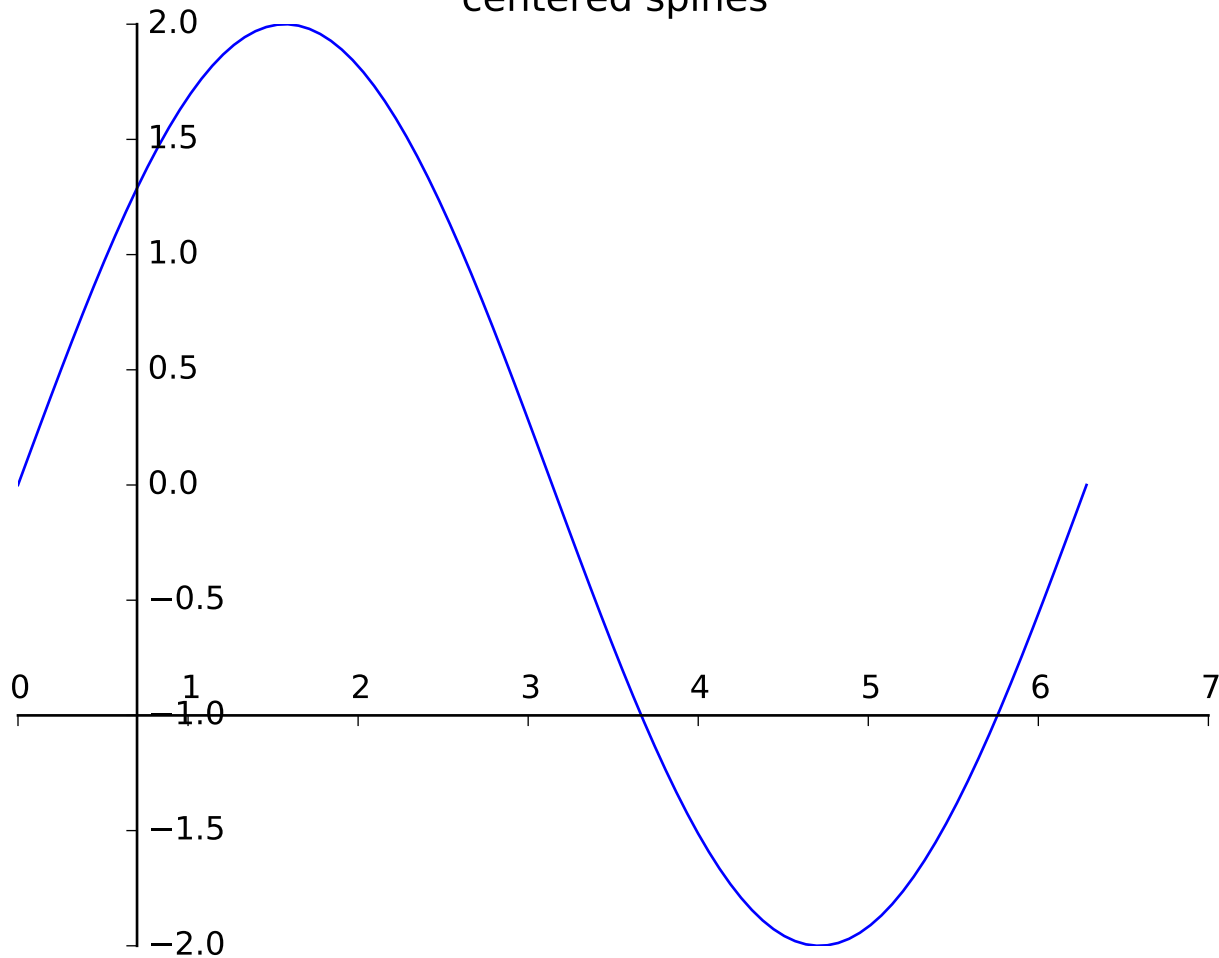

Supplement: Supplementary file 347 [file spines_axes_positions.pdf › Mac OS X/dist/avlog.app/Contents/Resources/lib/python2.7/matplotlib/tests/baseline_images/test_spines/spines_axes_positions.pdf]

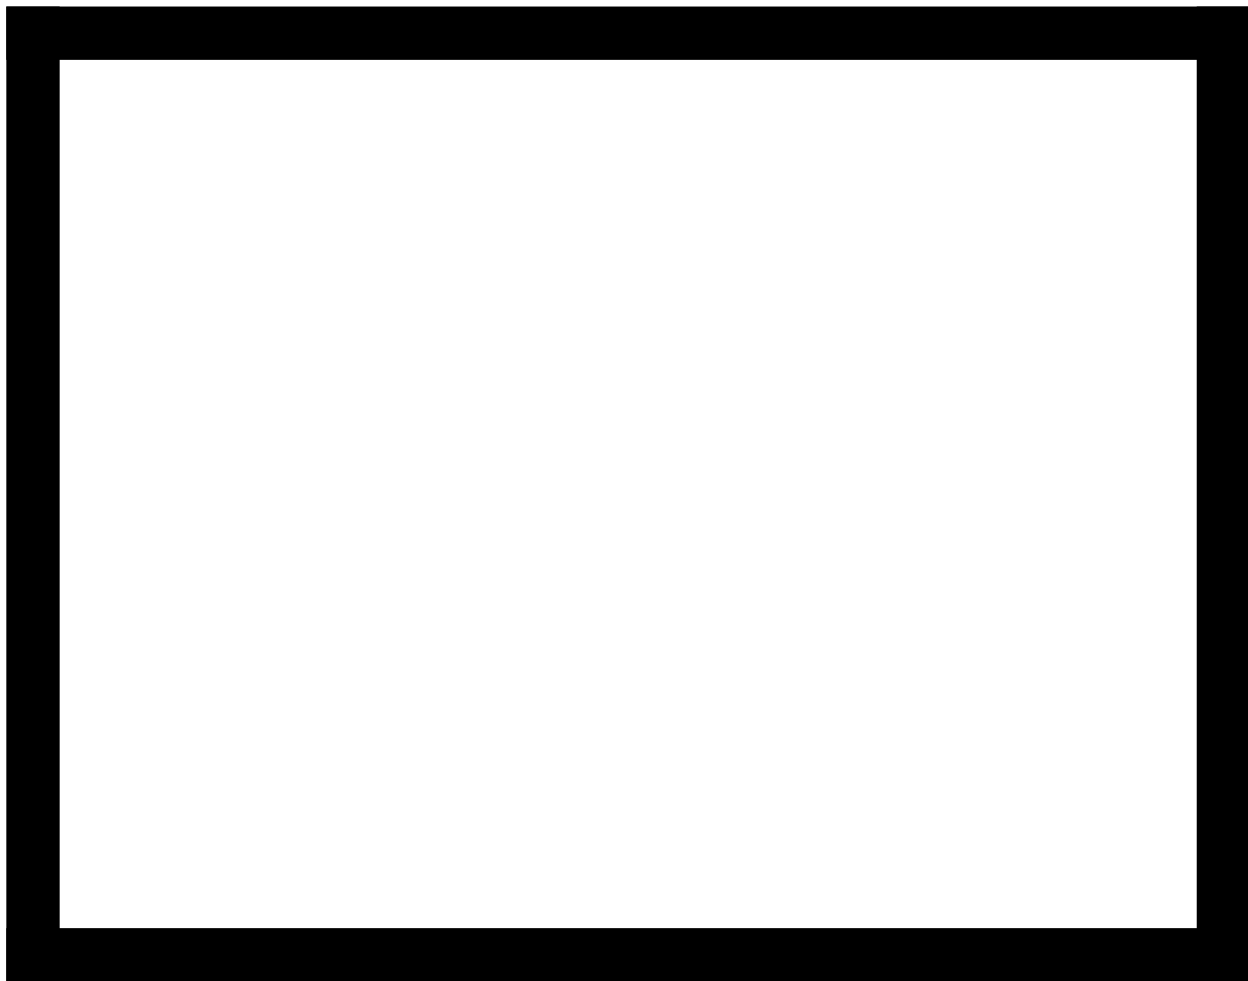

Supplement: Supplementary file 348 [file spines_capstyle.pdf › Mac OS X/dist/avlog.app/Contents/Resources/lib/python2.7/matplotlib/tests/baseline_images/test_spines/spines_capstyle.pdf]

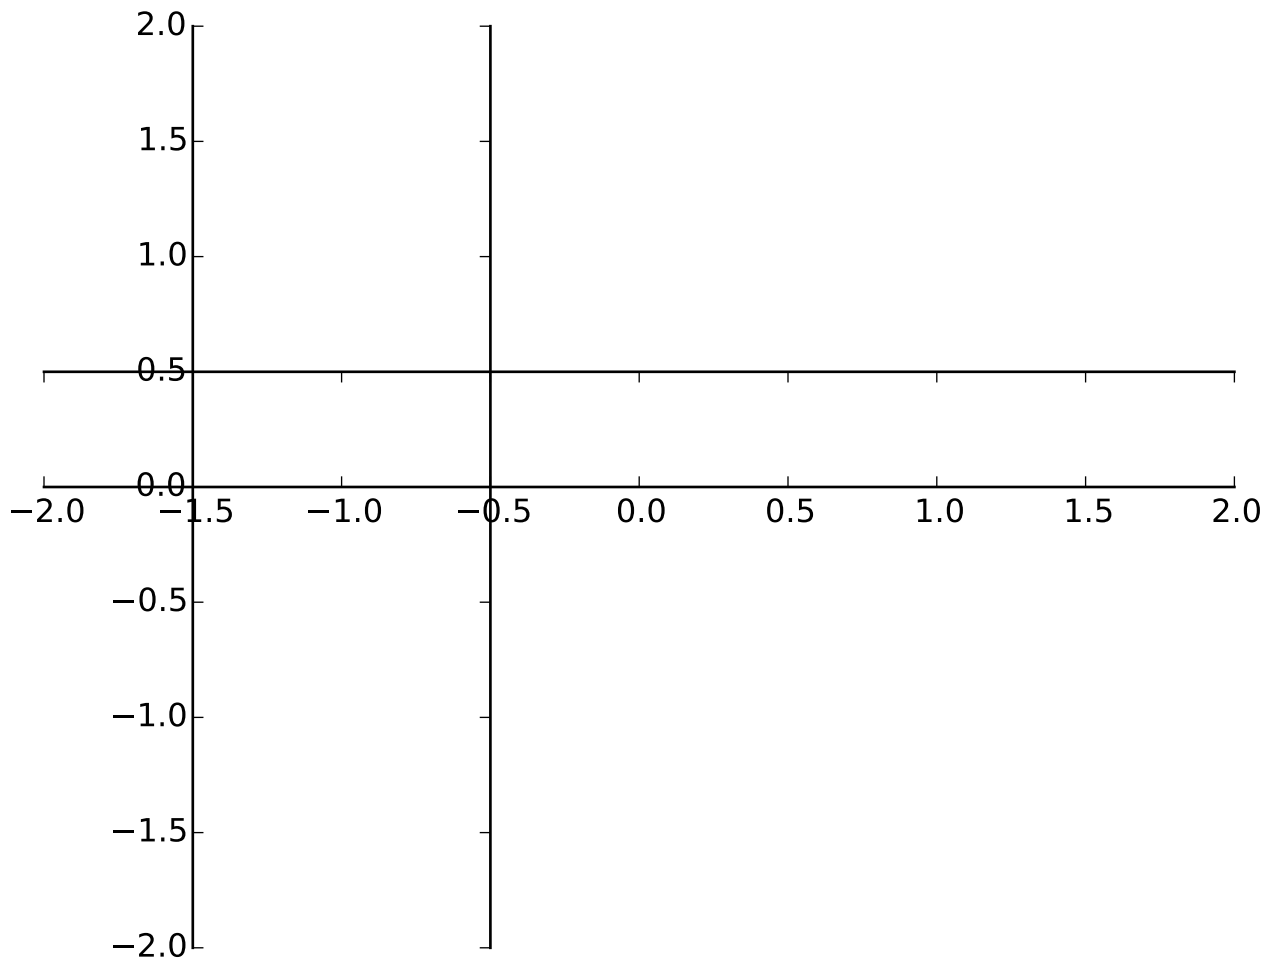

Supplement: Supplementary file 349 [file spines_data_positions.pdf › Mac OS X/dist/avlog.app/Contents/Resources/lib/python2.7/matplotlib/tests/baseline_images/test_spines/spines_data_positions.pdf]

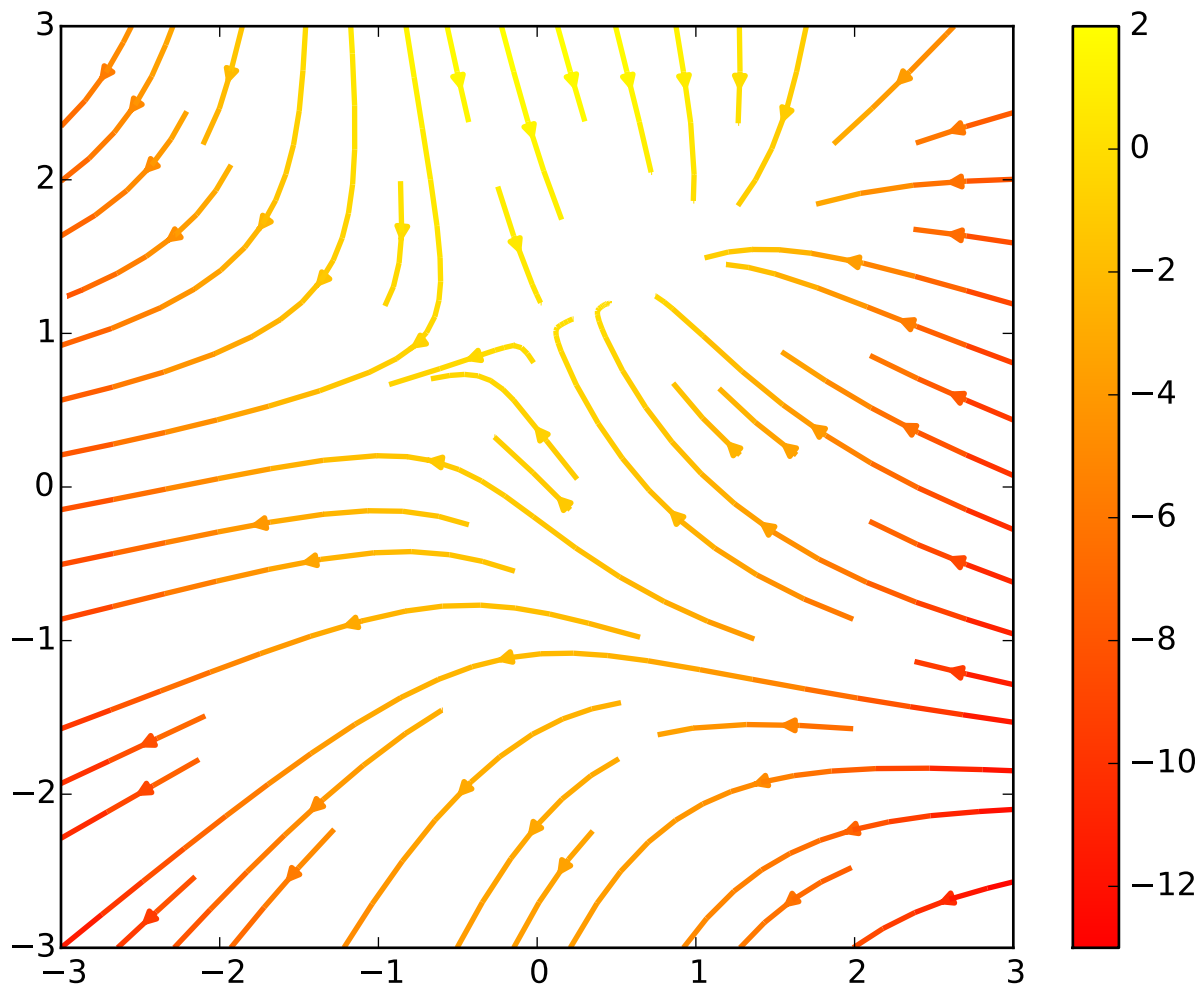

Supplement: Supplementary file 350 [file streamplot_colormap_test_image.pdf › Mac OS X/dist/avlog.app/Contents/Resources/lib/python2.7/matplotlib/tests/baseline_images/test_streamplot/streamplot_colormap_test_image.pdf]

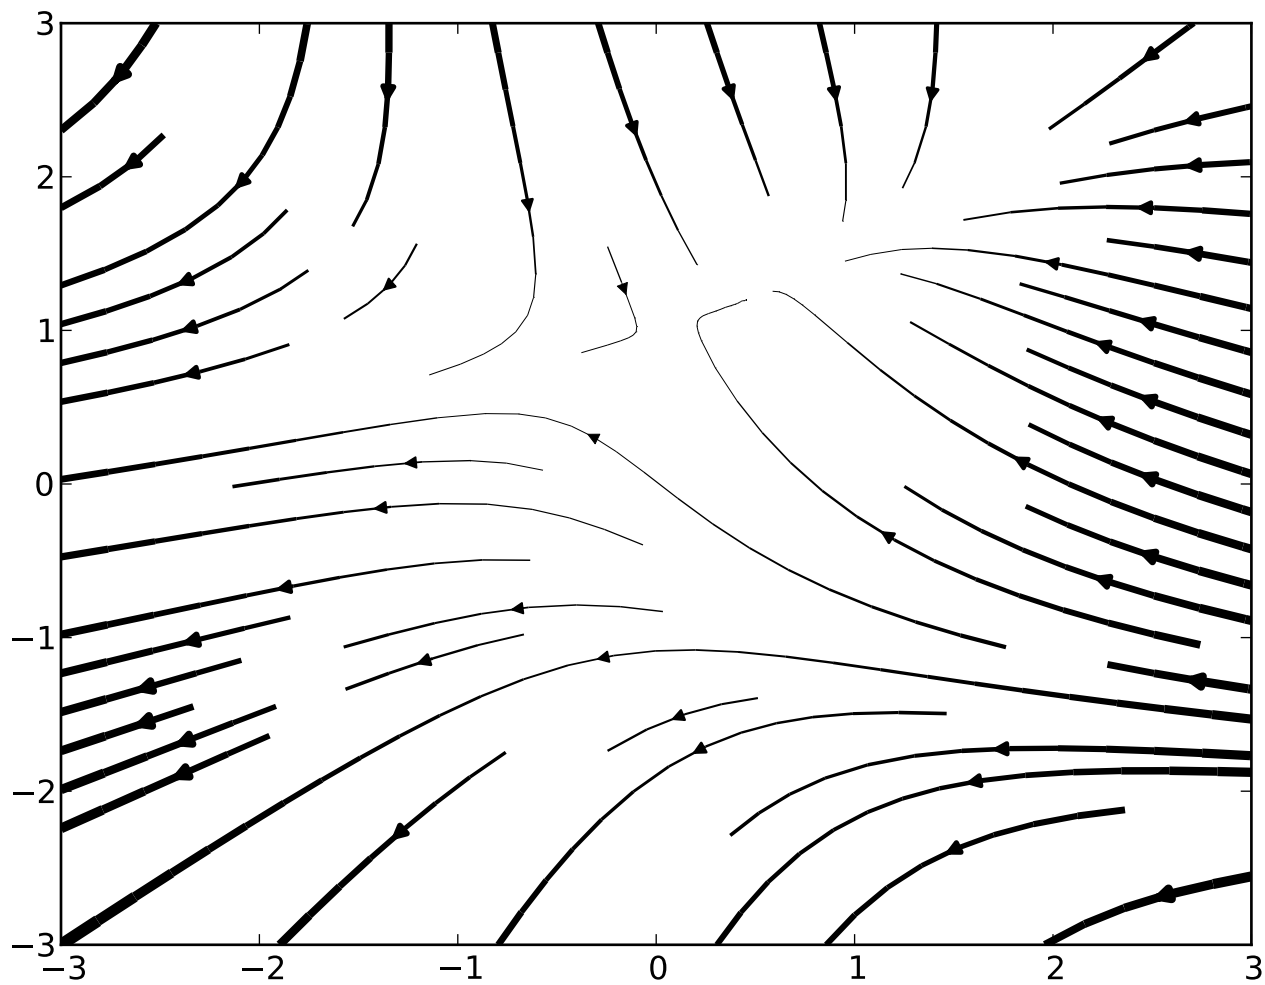

Supplement: Supplementary file 351 [file streamplot_linewidth_test_image.pdf › Mac OS X/dist/avlog.app/Contents/Resources/lib/python2.7/matplotlib/tests/baseline_images/test_streamplot/streamplot_linewidth_test_image.pdf]

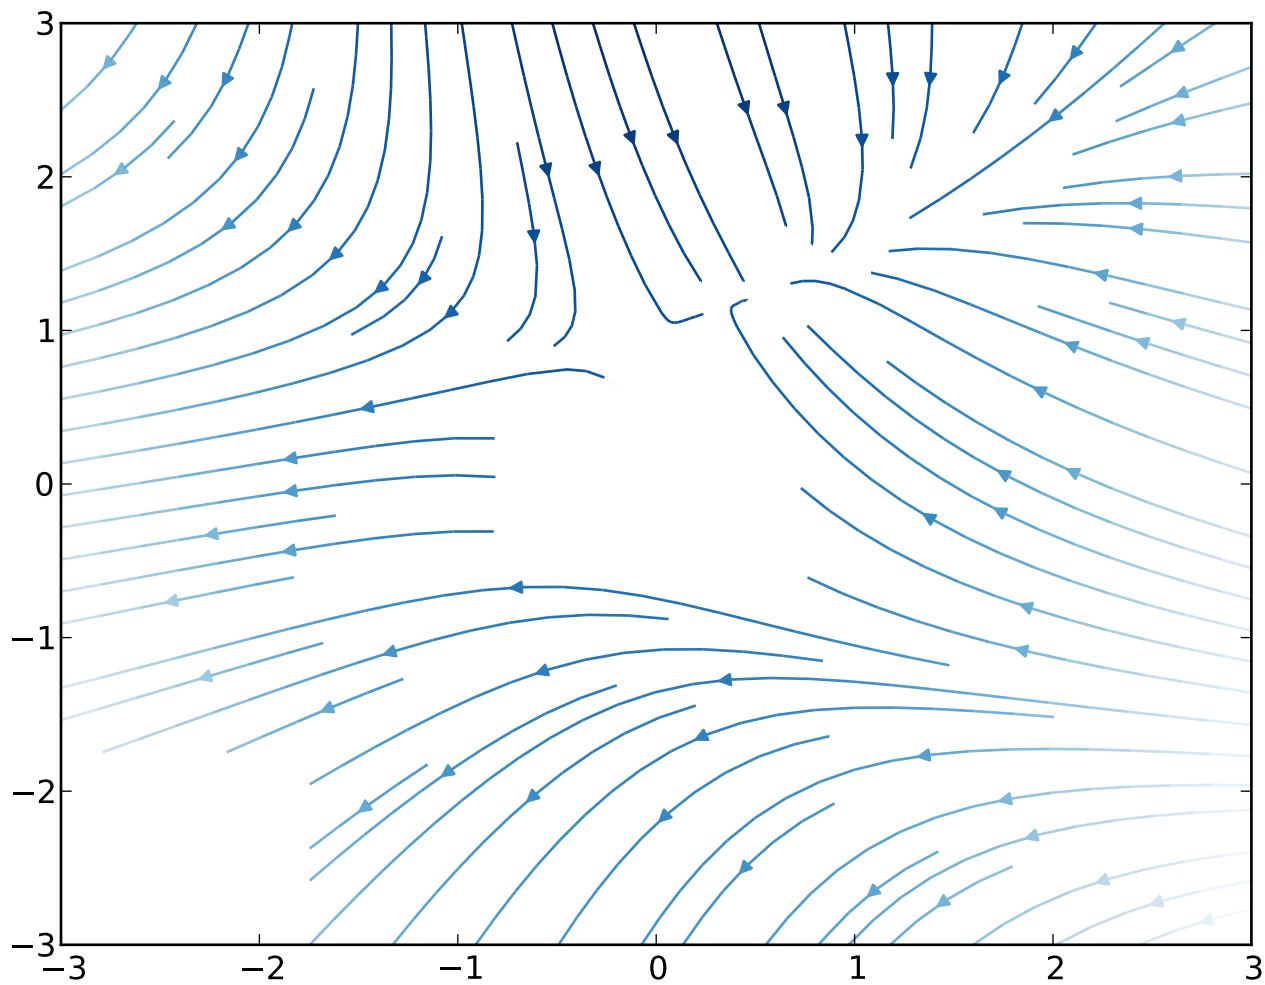

Supplement: Supplementary file 352 [file streamplot_masks_and_nans_test_image.pdf › Mac OS X/dist/avlog.app/Contents/Resources/lib/python2.7/matplotlib/tests/baseline_images/test_streamplot/streamplot_masks_and_nans_test_image.pdf]

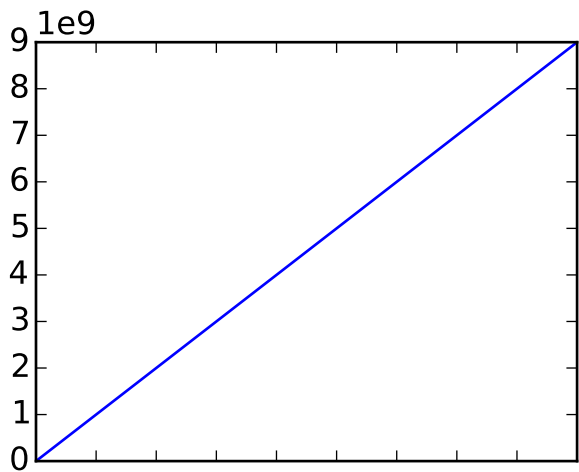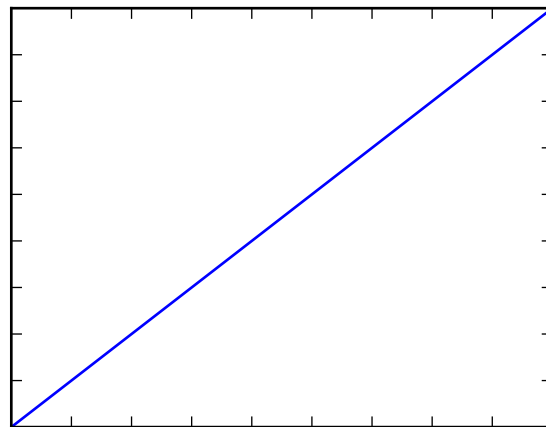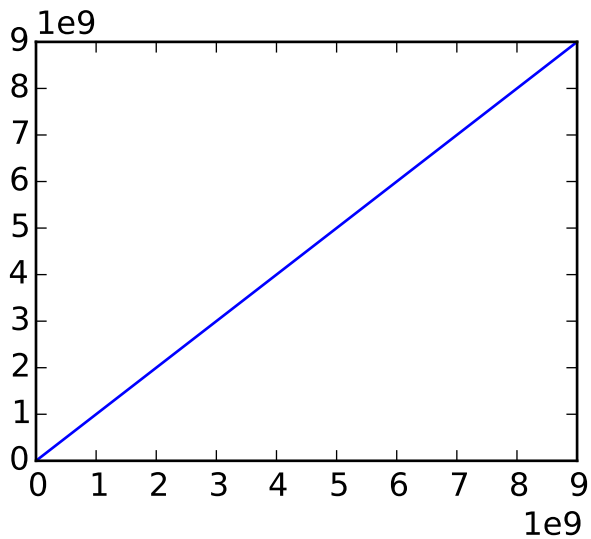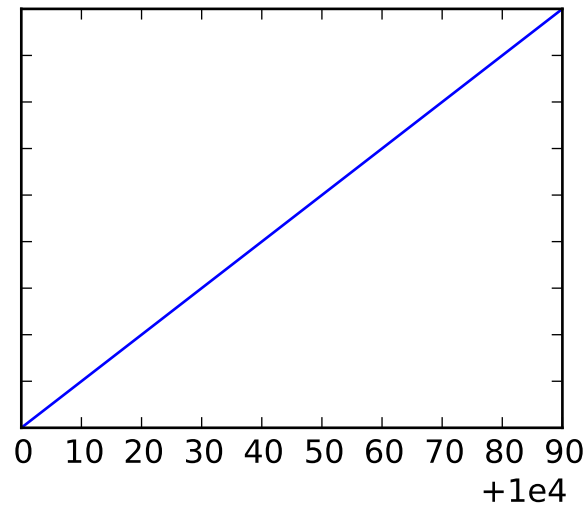

Supplement: Supplementary file 353 [file subplots_offset_text.pdf › Mac OS X/dist/avlog.app/Contents/Resources/lib/python2.7/matplotlib/tests/baseline_images/test_subplots/subplots_offset_text.pdf]

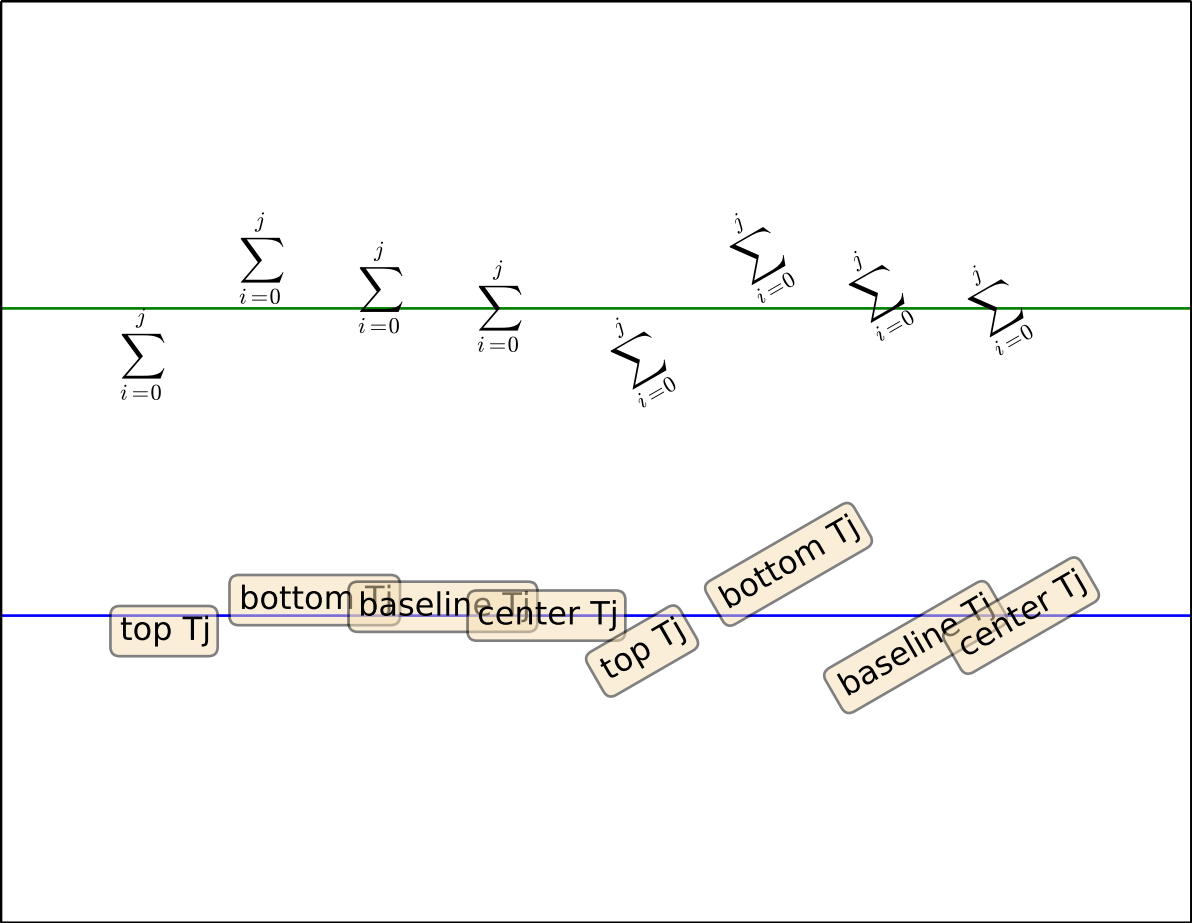

Supplement: Supplementary file 356 [file text_alignment.pdf › Mac OS X/dist/avlog.app/Contents/Resources/lib/python2.7/matplotlib/tests/baseline_images/test_text/text_alignment.pdf]

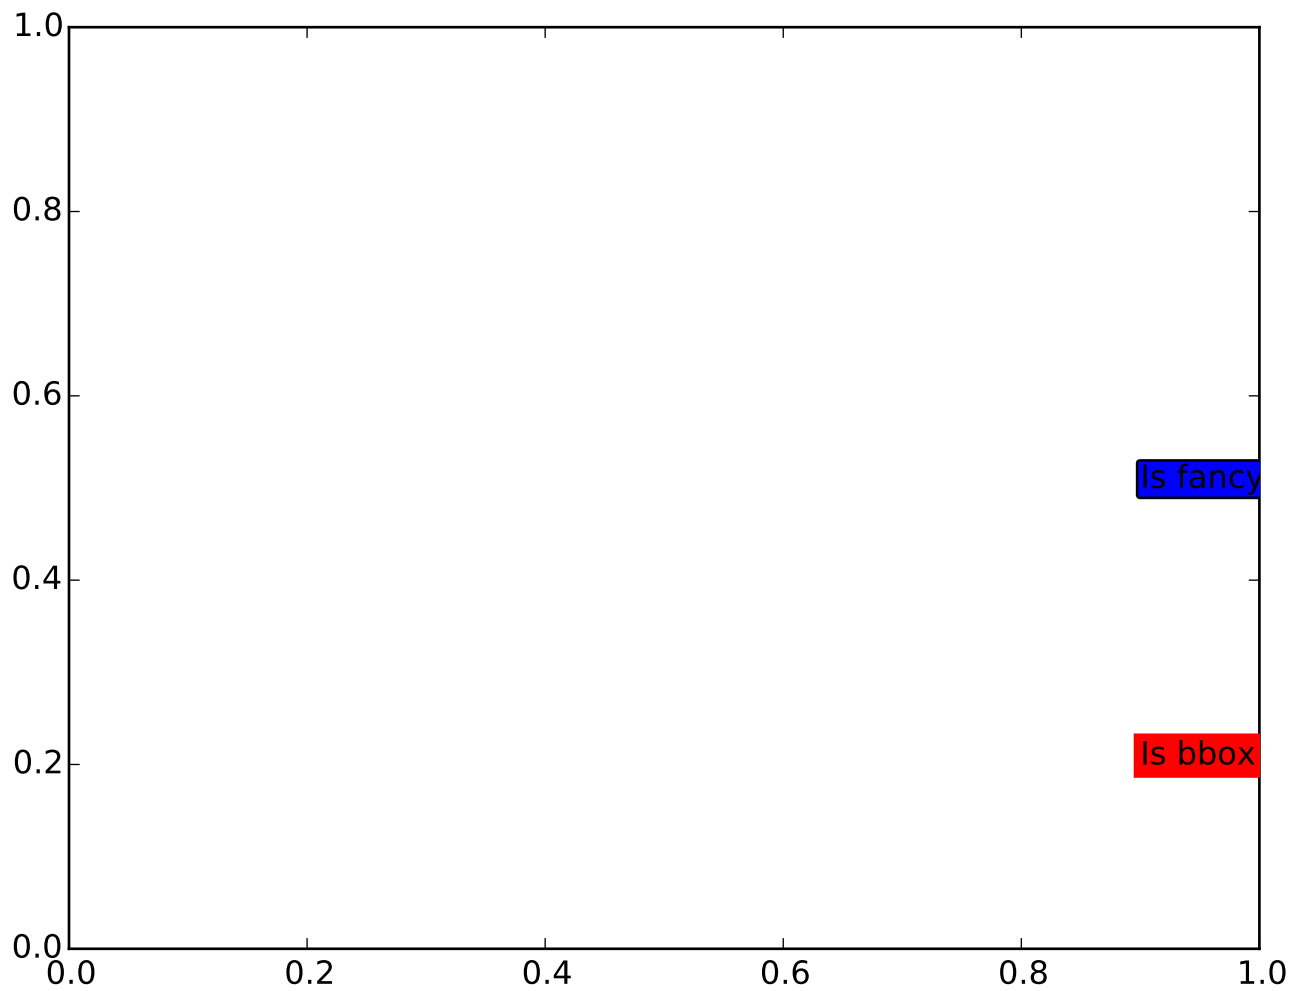

Supplement: Supplementary file 357 [file text_bboxclip.pdf › Mac OS X/dist/avlog.app/Contents/Resources/lib/python2.7/matplotlib/tests/baseline_images/test_text/text_bboxclip.pdf]

left title

right title

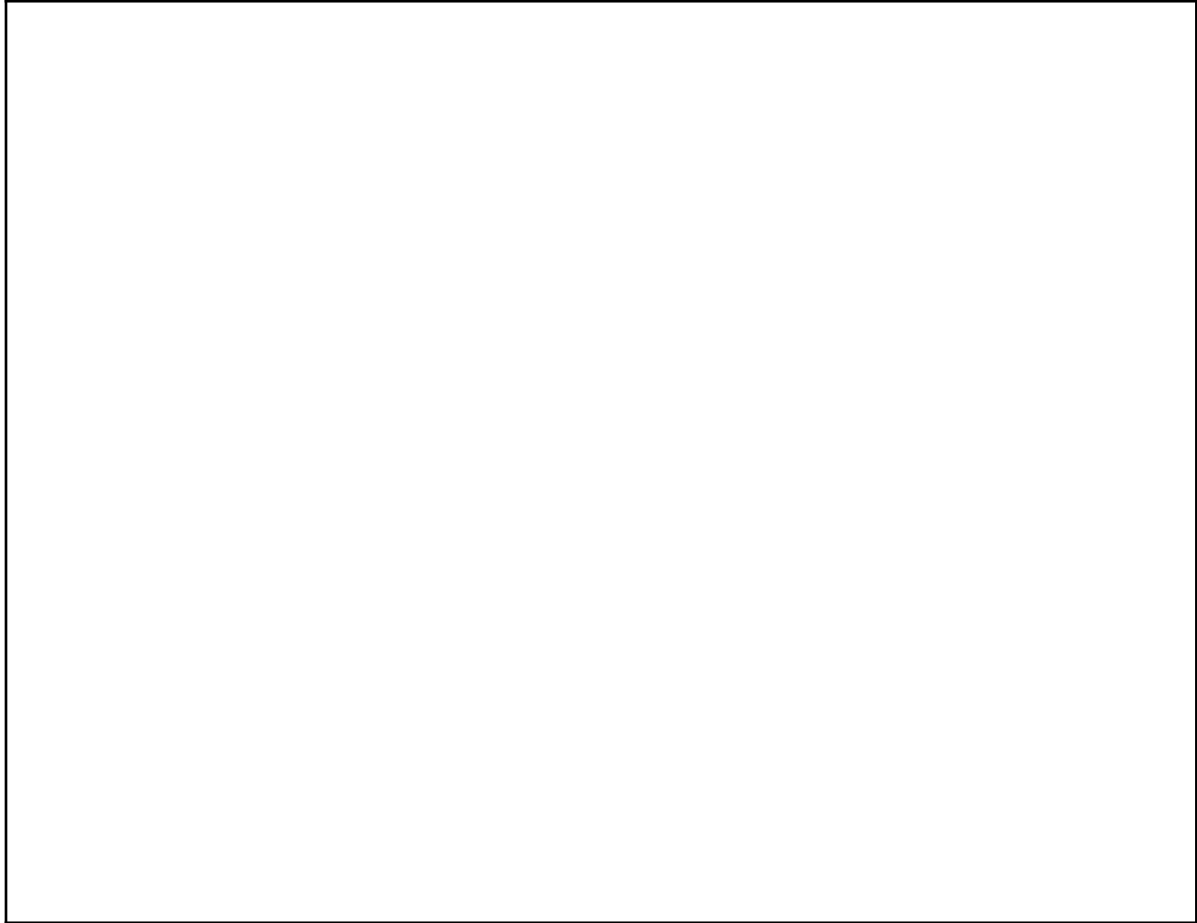

Supplement: Supplementary file 358 [file titles.pdf › Mac OS X/dist/avlog.app/Contents/Resources/lib/python2.7/matplotlib/tests/baseline_images/test_text/titles.pdf]

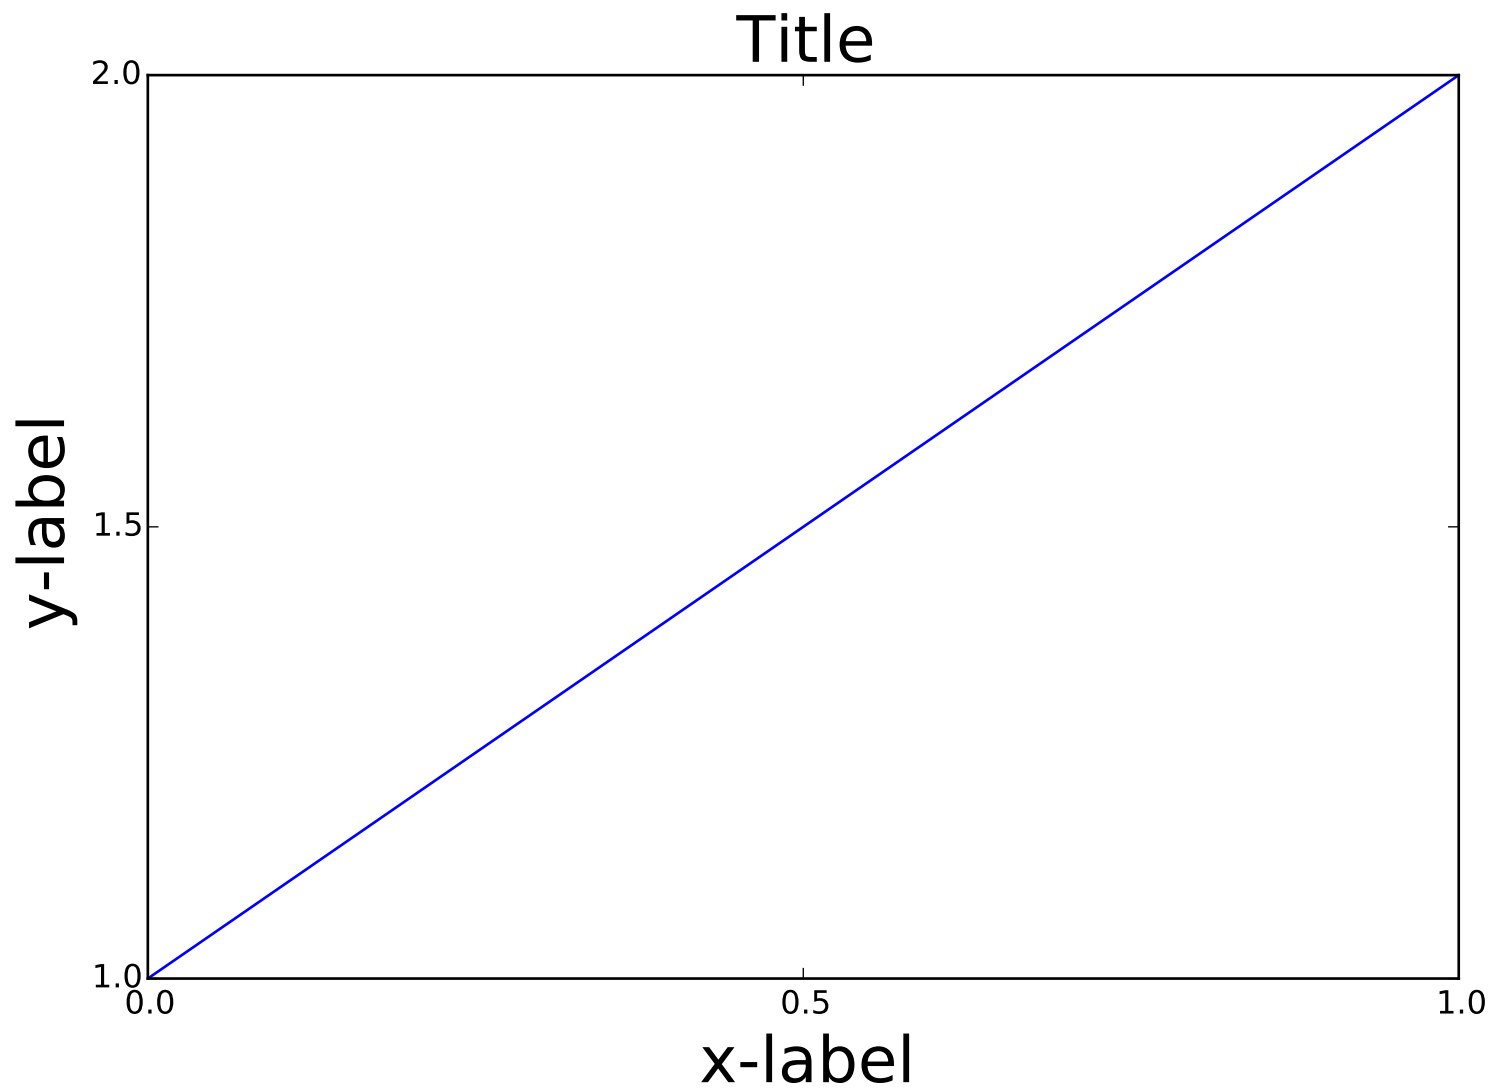

Supplement: Supplementary file 359 [file tight_layout1.pdf › Mac OS X/dist/avlog.app/Contents/Resources/lib/python2.7/matplotlib/tests/baseline_images/test_tightlayout/tight_layout1.pdf]

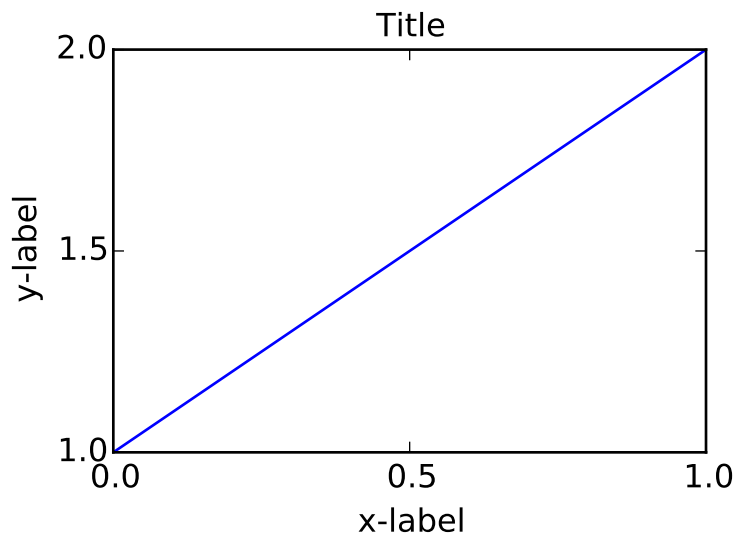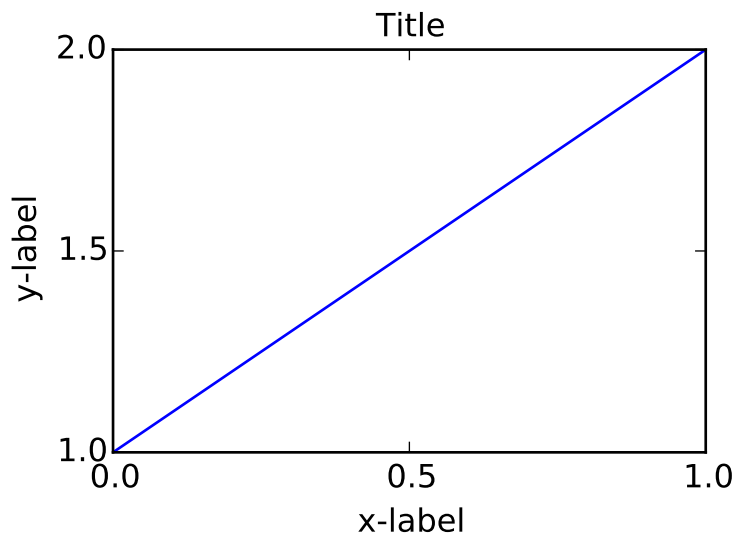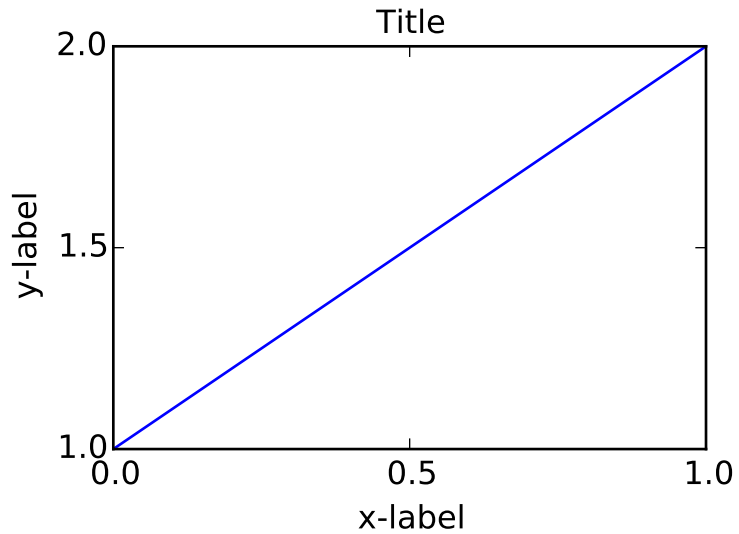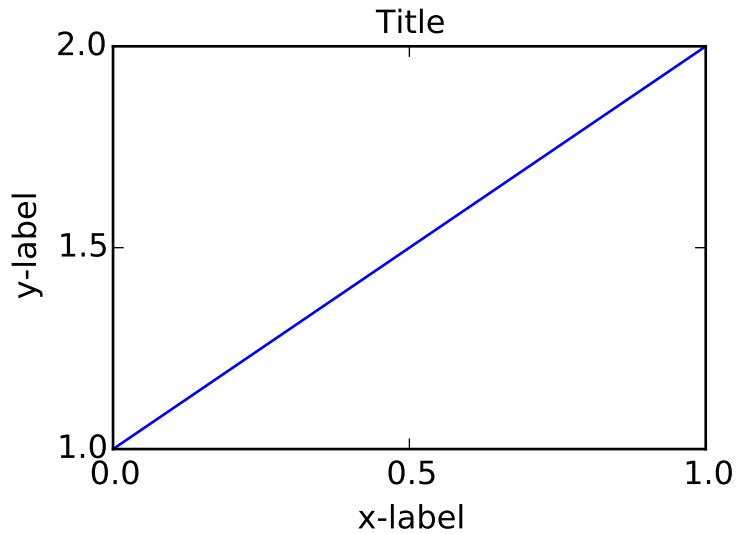

Supplement: Supplementary file 360 [file tight_layout2.pdf › Mac OS X/dist/avlog.app/Contents/Resources/lib/python2.7/matplotlib/tests/baseline_images/test_tightlayout/tight_layout2.pdf]

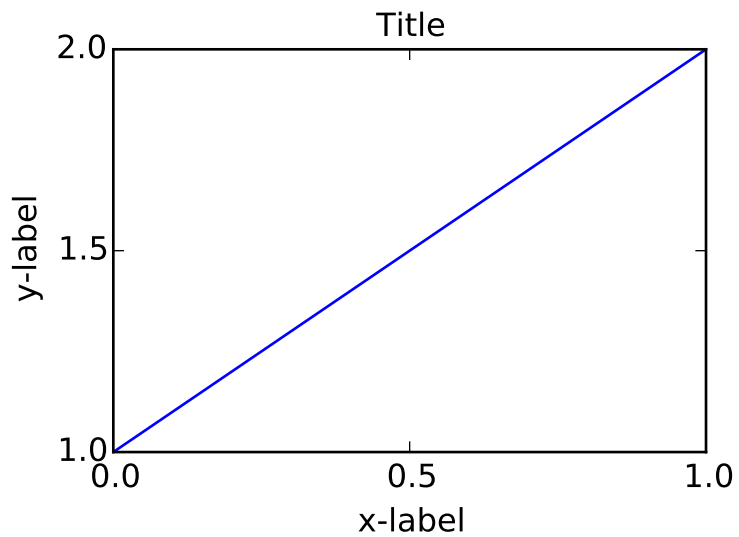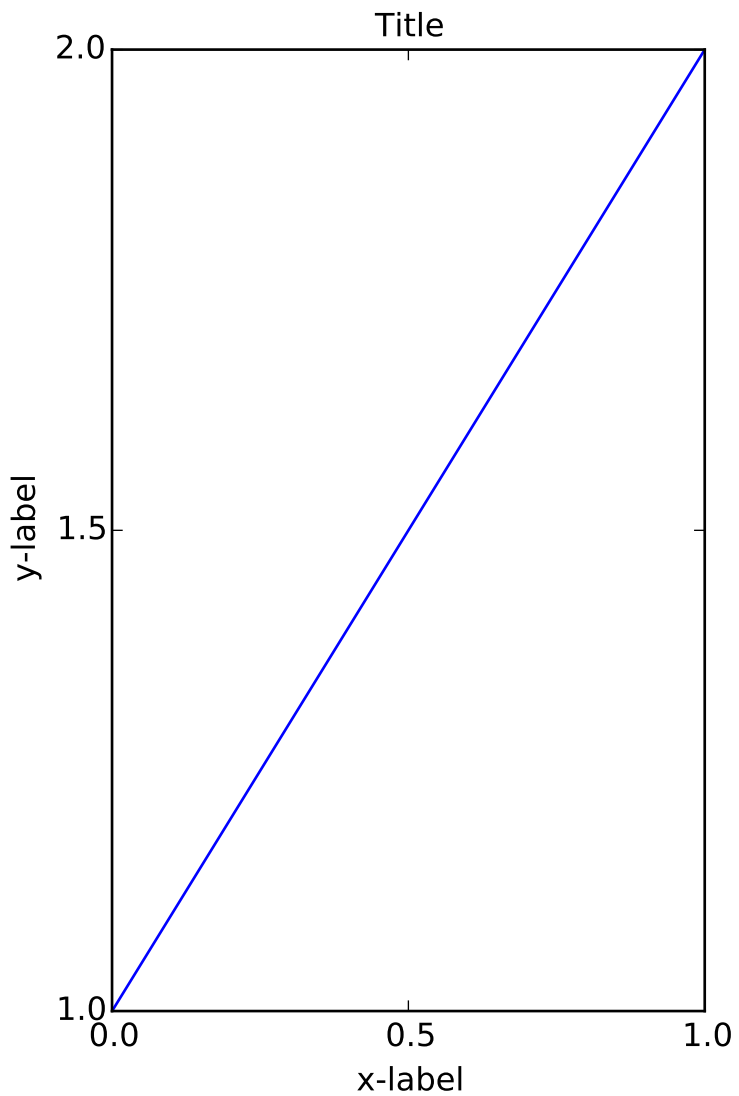

Supplement: Supplementary file 361 [file tight_layout3.pdf › Mac OS X/dist/avlog.app/Contents/Resources/lib/python2.7/matplotlib/tests/baseline_images/test_tightlayout/tight_layout3.pdf]

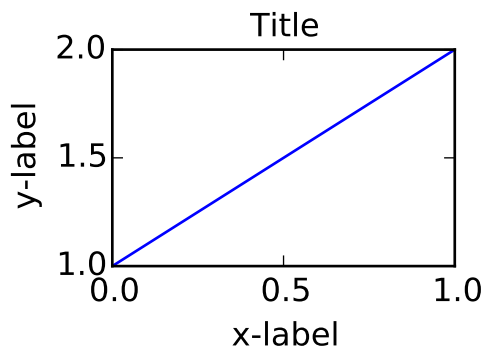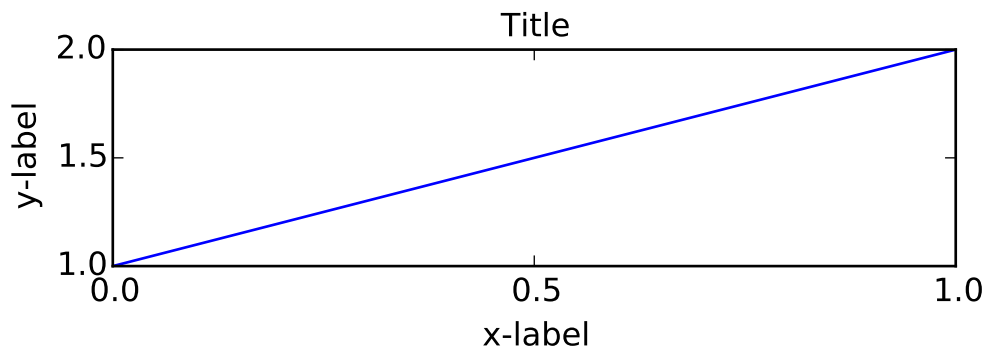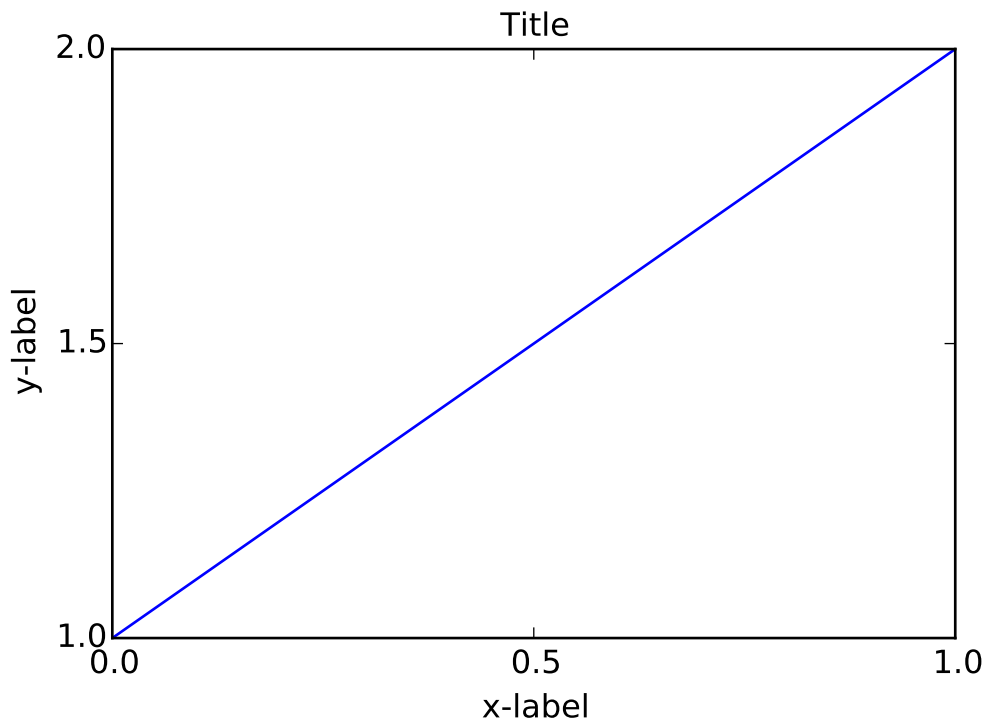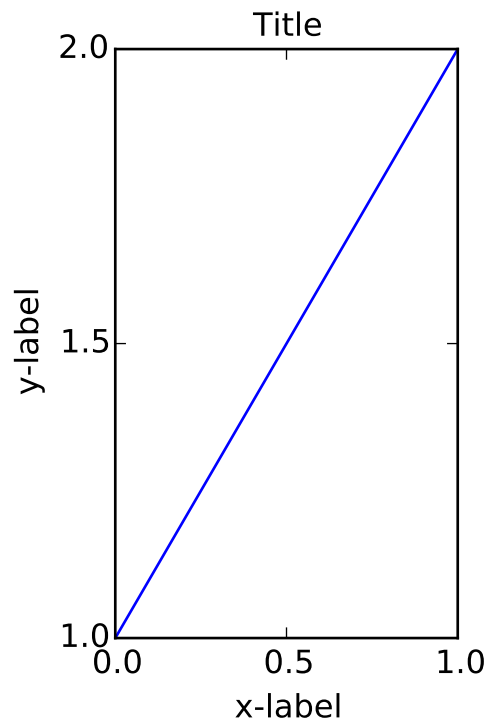

Supplement: Supplementary file 362 [file tight_layout4.pdf › Mac OS X/dist/avlog.app/Contents/Resources/lib/python2.7/matplotlib/tests/baseline_images/test_tightlayout/tight_layout4.pdf]

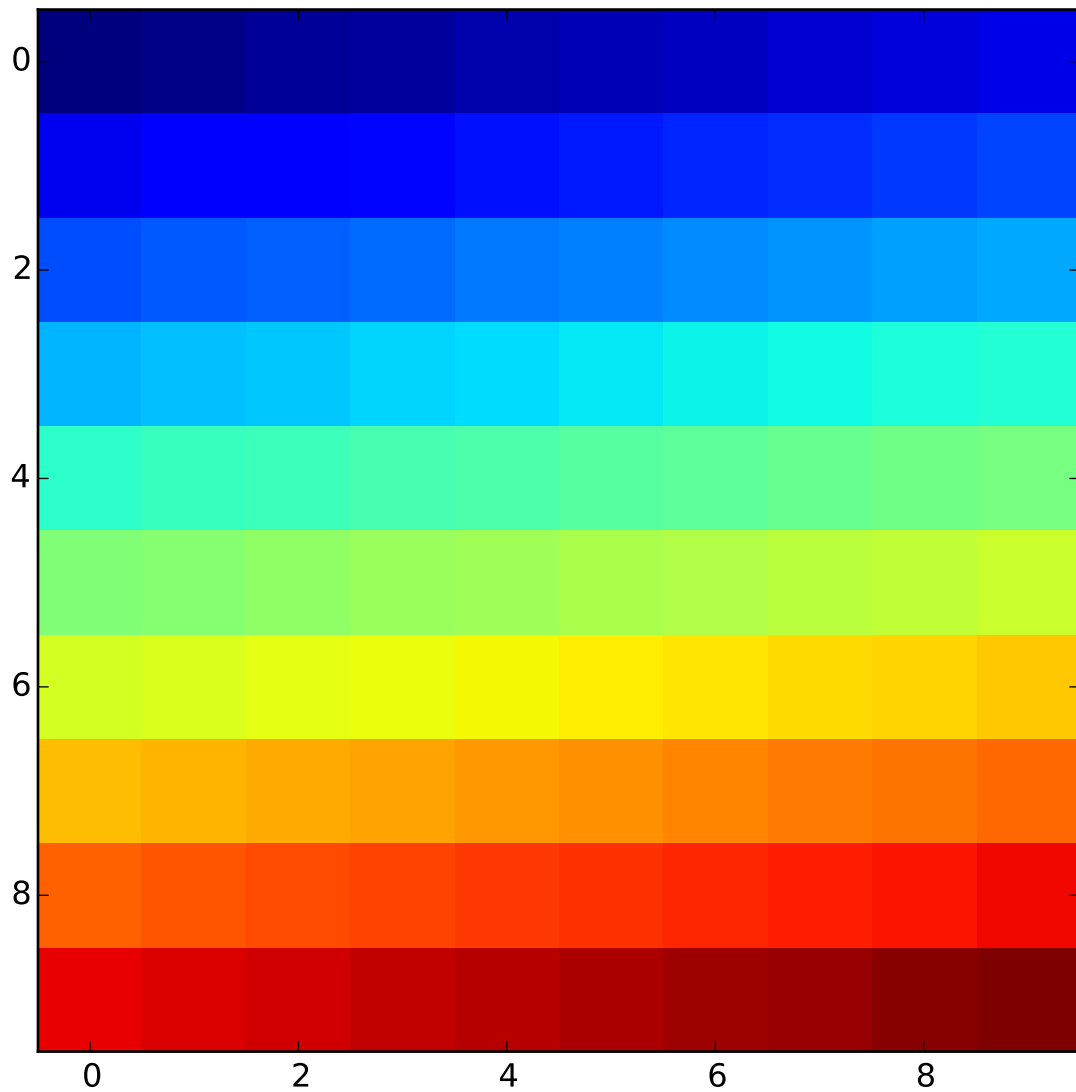

Supplement: Supplementary file 363 [file tight_layout5.pdf › Mac OS X/dist/avlog.app/Contents/Resources/lib/python2.7/matplotlib/tests/baseline_images/test_tightlayout/tight_layout5.pdf]

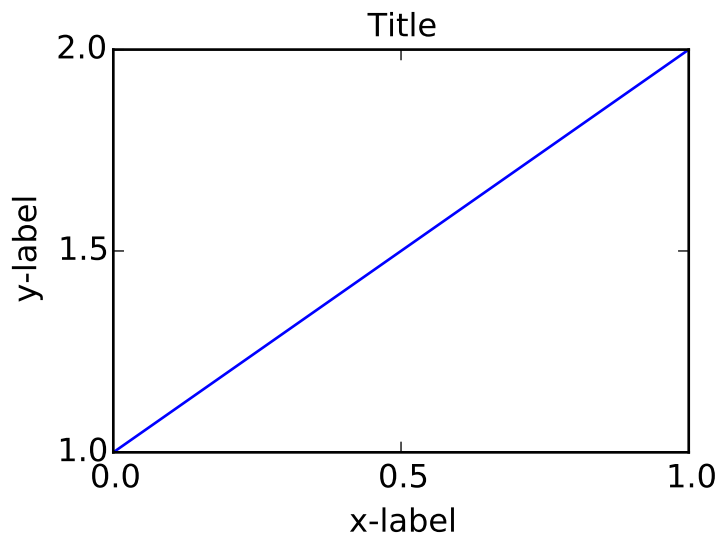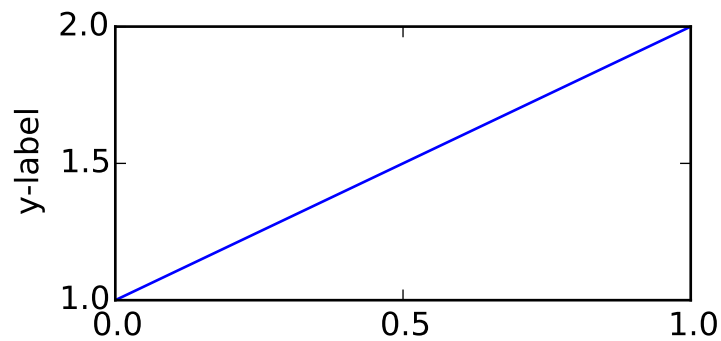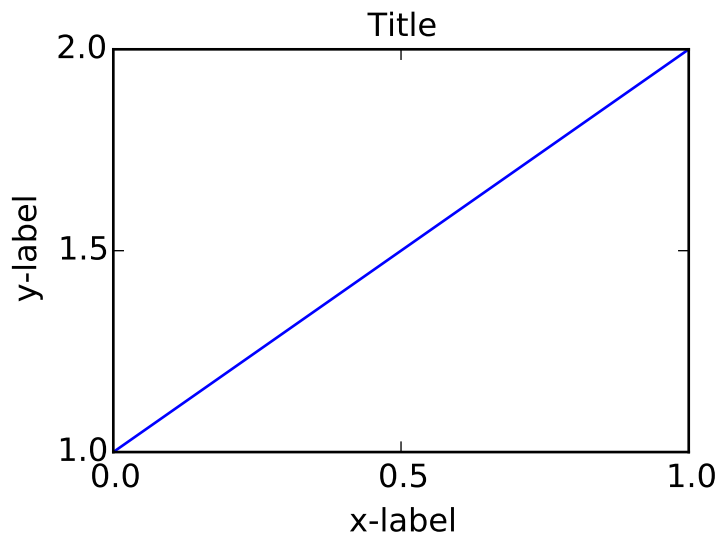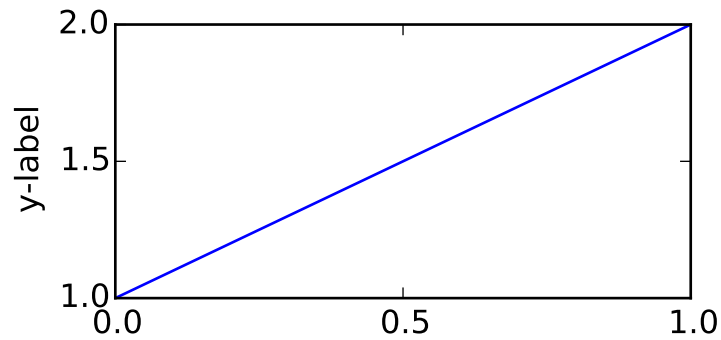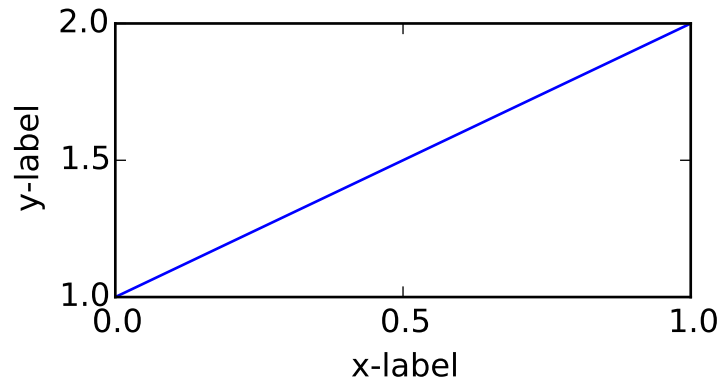

Supplement: Supplementary file 364 [file tight_layout6.pdf › Mac OS X/dist/avlog.app/Contents/Resources/lib/python2.7/matplotlib/tests/baseline_images/test_tightlayout/tight_layout6.pdf]

Left Title

Right Title

y-label

x-label

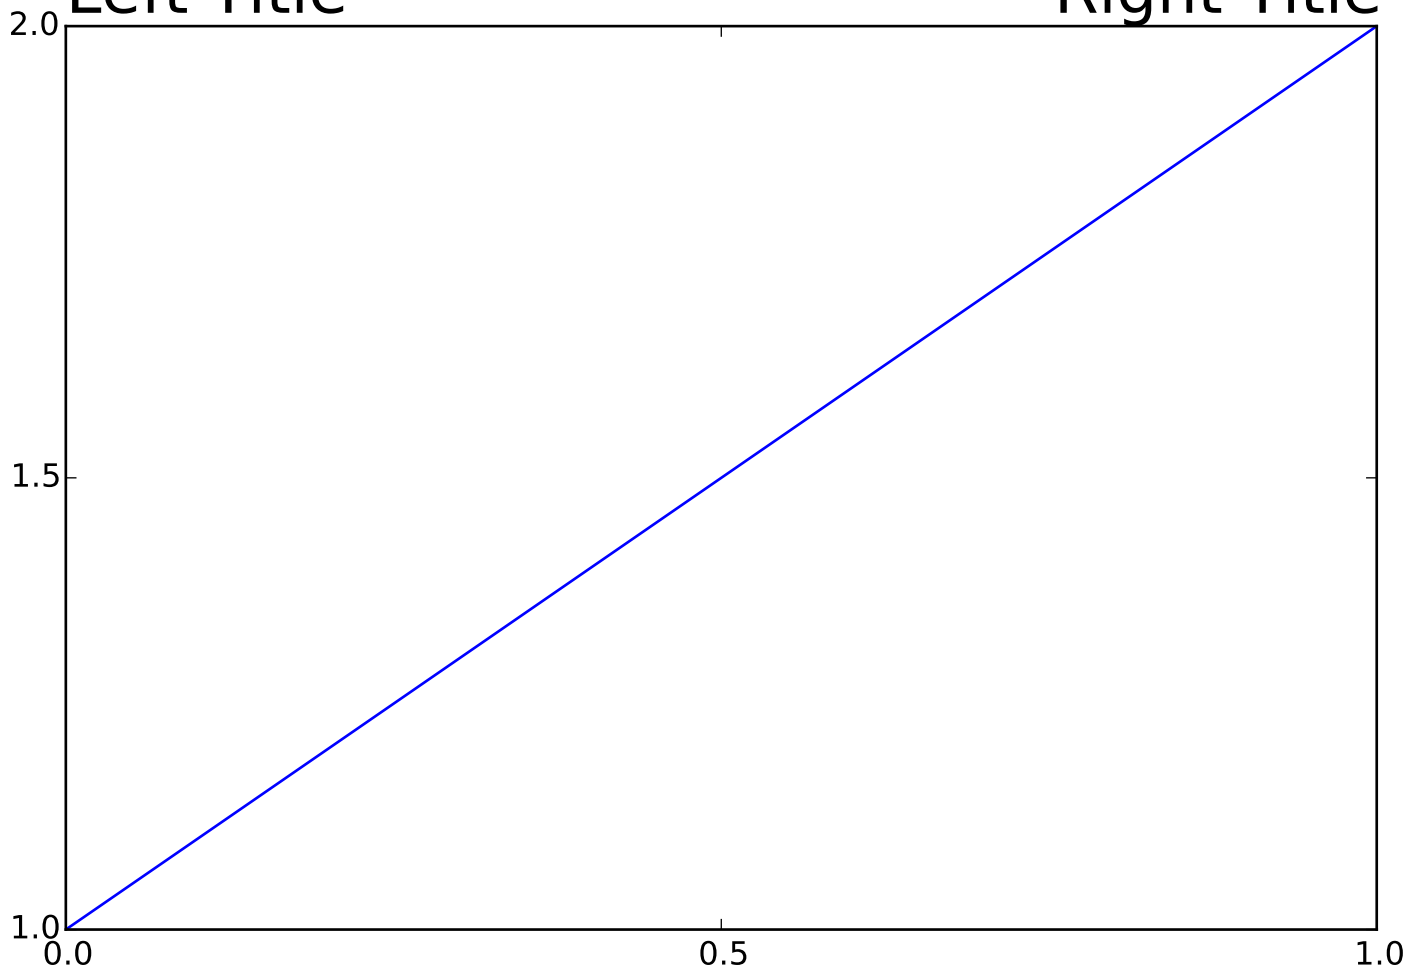

Supplement: Supplementary file 365 [file tight_layout7.pdf › Mac OS X/dist/avlog.app/Contents/Resources/lib/python2.7/matplotlib/tests/baseline_images/test_tightlayout/tight_layout7.pdf]

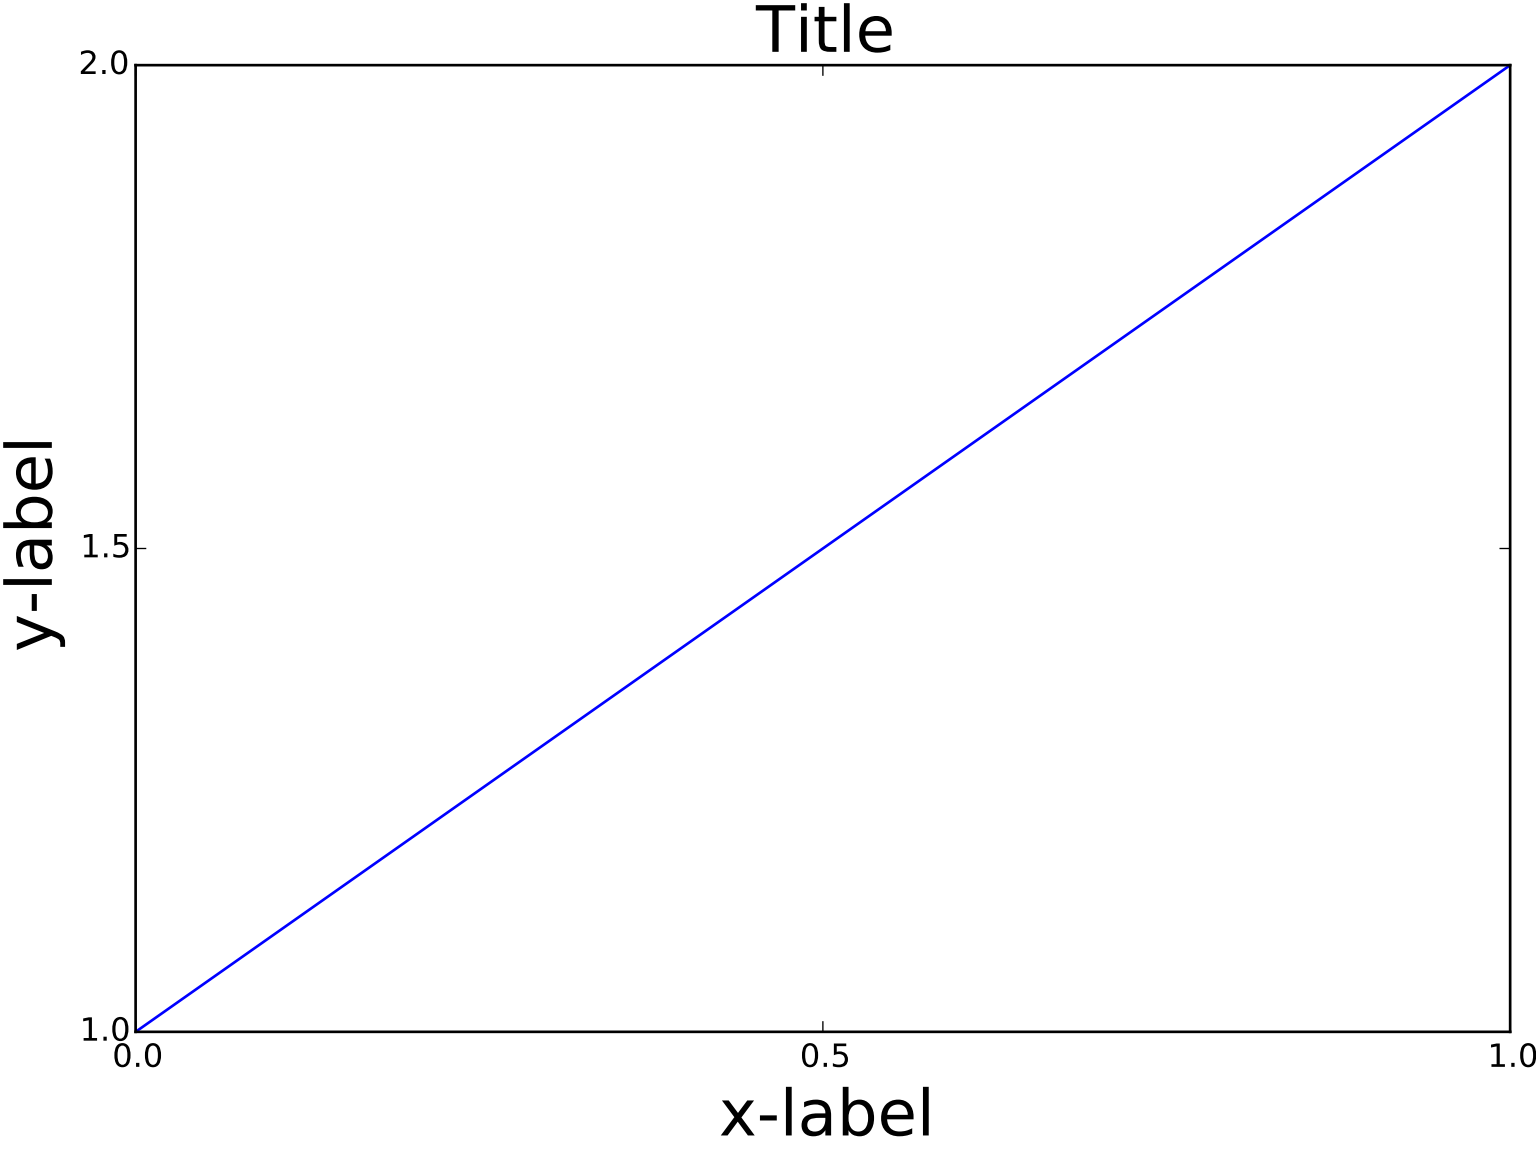

Supplement: Supplementary file 366 [file tight_layout8.pdf › Mac OS X/dist/avlog.app/Contents/Resources/lib/python2.7/matplotlib/tests/baseline_images/test_tightlayout/tight_layout8.pdf]

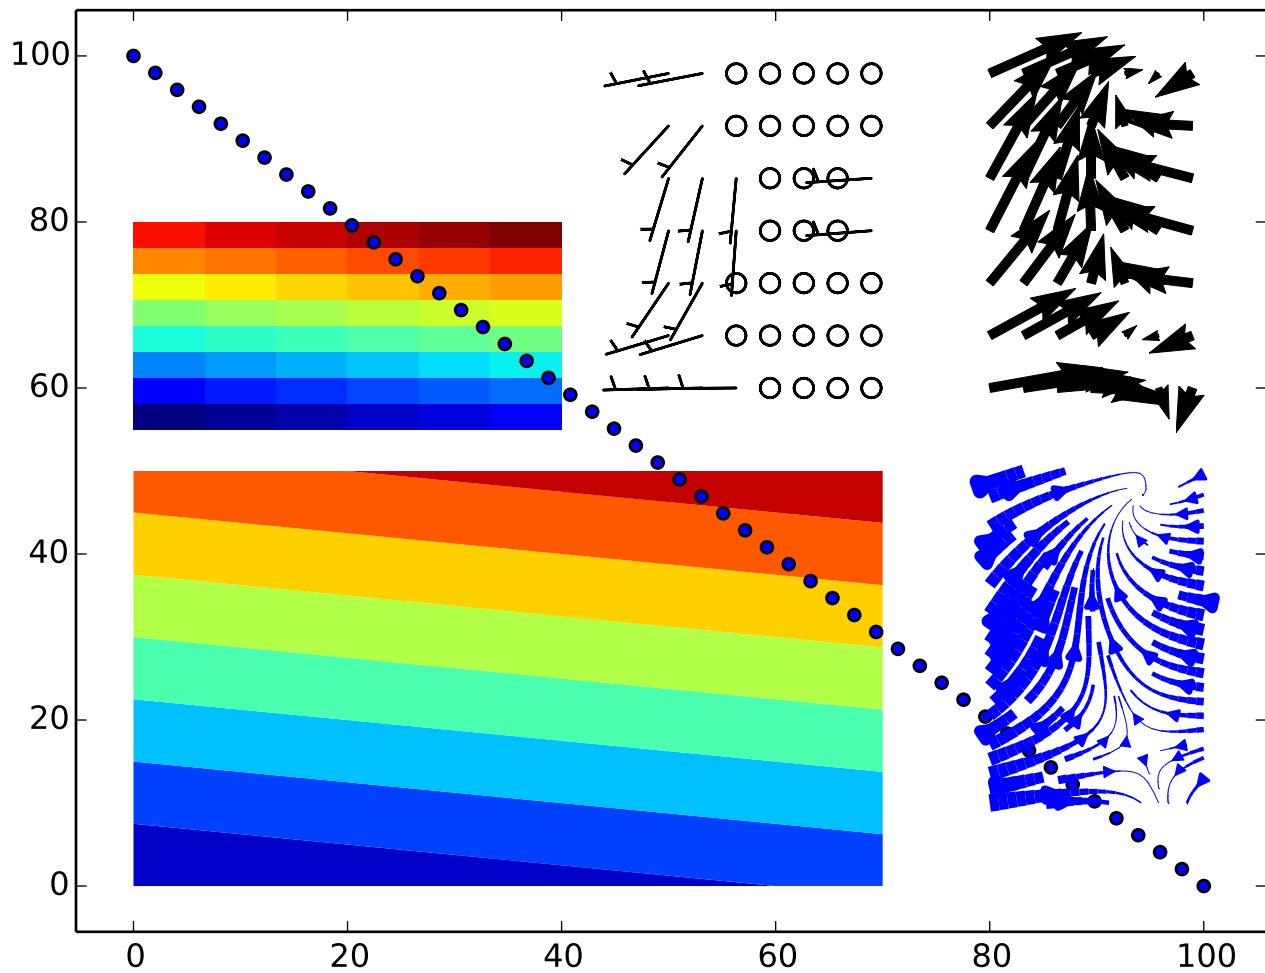

Supplement: Supplementary file 367 [file pre_transform_data.pdf › Mac OS X/dist/avlog.app/Contents/Resources/lib/python2.7/matplotlib/tests/baseline_images/test_transforms/pre_transform_data.pdf]

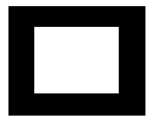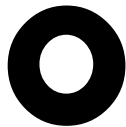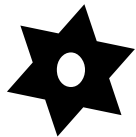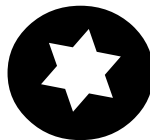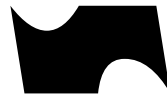

Supplement: Supplementary file 368 [file truetype-conversion.pdf › Mac OS X/dist/avlog.app/Contents/Resources/lib/python2.7/matplotlib/tests/baseline_images/test_ttconv/truetype-conversion.pdf]
